# Supplementary material for: LncRNA TINCR favors tumorigenesis via STAT3–TINCR–EGFR-feedback loop by recruiting DNMT1 and acting as a competing endogenous RNA in human breast cancer
Source: Springer Nature journal article supplement (doi:10.1038/s41419-020-03188-0), 2021-01-14
Supplement: MOESM9 [file 41419_2020_3188_MOESM9_ESM.pdf]

a.COR

| Correlated Gene | Spearman's Correlation | p-Value  | Correlated Gene | Spearman's Correlation | p-Value  | Correlated Gene | Spearman's Correlation | p-Value  |
|-----------------|------------------------|----------|-----------------|------------------------|----------|-----------------|------------------------|----------|
| MEAK7           | 0.444397               | 1.38E-53 | SYT12           | 0.226356               | 4.88E-14 | CDON            | -0.20814               | 4.70E-12 |
| DBNDD1          | 0.399647               | 9.35E-43 | PSORS1C2        | 0.226316               | 4.93E-14 | SUSD3           | -0.20824               | 4.58E-12 |
| HR              | 0.393644               | 2.01E-41 | DDX19A          | 0.226261               | 5.00E-14 | BCAT2           | -0.20857               | 4.23E-12 |
| TMEM40          | 0.380388               | 1.41E-38 | CALB2           | 0.226248               | 5.02E-14 | ZNF407          | -0.20862               | 4.19E-12 |
| FUT3            | 0.37779                | 4.90E-38 | DNAJC9          | 0.225716               | 5.77E-14 | FRMPD2          | -0.20874               | 4.07E-12 |
| B3GNT3          | 0.370716               | 1.39E-36 | PLOD1           | 0.225583               | 5.97E-14 | SELENOP         | -0.20886               | 3.95E-12 |
| NCCRP1          | 0.369515               | 2.43E-36 | MYO1E           | 0.225514               | 6.08E-14 | PRDX3           | -0.20887               | 3.94E-12 |
| CLDN23          | 0.362023               | 7.55E-35 | GTPBP4          | 0.224958               | 7.03E-14 | MTX3            | -0.20942               | 3.45E-12 |
| SDC1            | 0.361878               | 8.06E-35 | FADS6           | 0.224802               | 7.32E-14 | TRIM8           | -0.20945               | 3.42E-12 |
| KPNA7           | 0.353579               | 3.26E-33 | C11ORF80        | 0.224408               | 8.11E-14 | ZNF839          | -0.20955               | 3.34E-12 |
| KRT80           | 0.350523               | 1.24E-32 | LPAR2           | 0.22438                | 8.17E-14 | CDKL3           | -0.20966               | 3.26E-12 |
| SLC15A1         | 0.348151               | 3.46E-32 | KLK6            | 0.22435                | 8.23E-14 | MEGF8           | -0.20981               | 3.14E-12 |
| ZNRF1           | 0.347917               | 3.82E-32 | PPIF            | 0.2241                 | 8.78E-14 | CYP2A7          | -0.20991               | 3.06E-12 |
| NPW             | 0.347675               | 4.24E-32 | MIS18A          | 0.223969               | 9.09E-14 | ARMT1           | -0.20996               | 3.03E-12 |
| TFAP2C          | 0.344179               | 1.89E-31 | ACTR3           | 0.223968               | 9.09E-14 | ABLIM3          | -0.21                  | 3.00E-12 |
| TUBB3           | 0.342043               | 4.66E-31 | TGFA            | 0.223767               | 9.57E-14 | GALNT16         | -0.21004               | 2.98E-12 |
| SLC6A9          | 0.342039               | 4.67E-31 | STAU1           | 0.223741               | 9.64E-14 | MROH8           | -0.21008               | 2.94E-12 |
| NUP93           | 0.336492               | 4.72E-30 | GINS1           | 0.223598               | 1.00E-13 | SKAP1           | -0.2101                | 2.93E-12 |
| MUC16           | 0.334942               | 8.93E-30 | DNER            | 0.223355               | 1.06E-13 | CCNI            | -0.21019               | 2.87E-12 |
| CCNE1           | 0.327643               | 1.72E-28 | MPZL2           | 0.223166               | 1.12E-13 | IMPDH2          | -0.21025               | 2.82E-12 |
| KRT7            | 0.326656               | 2.54E-28 | LY6E-DT         | 0.223134               | 1.13E-13 | ABCG2           | -0.21028               | 2.81E-12 |

|          |          |          |           |          |          |         |          |          |
|----------|----------|----------|-----------|----------|----------|---------|----------|----------|
| GJB3     | 0.325285 | 4.38E-28 | SPIRE2    | 0.223072 | 1.15E-13 | CAPS2   | -0.21065 | 2.57E-12 |
| ADGRG1   | 0.324247 | 6.60E-28 | CEBPG     | 0.22297  | 1.18E-13 | TSPAN3  | -0.21065 | 2.57E-12 |
| TUBA1C   | 0.324134 | 6.90E-28 | MEX3D     | 0.222944 | 1.18E-13 | KCNJ11  | -0.21065 | 2.56E-12 |
| DUSP9    | 0.323312 | 9.54E-28 | MTHFD2    | 0.222804 | 1.23E-13 | IQGAP2  | -0.21083 | 2.46E-12 |
| S100A7   | 0.322292 | 1.42E-27 | KARS      | 0.22273  | 1.25E-13 | FSIP1   | -0.21091 | 2.41E-12 |
| HS3ST6   | 0.321236 | 2.15E-27 | ABRACL    | 0.222568 | 1.30E-13 | DBNDD2  | -0.21103 | 2.34E-12 |
| KDM7A-DT | 0.320288 | 3.11E-27 | TRPV6     | 0.222538 | 1.31E-13 | UFSP2   | -0.21108 | 2.31E-12 |
| GRHL3    | 0.319913 | 3.60E-27 | CORO1C    | 0.222419 | 1.36E-13 | TMED8   | -0.21111 | 2.29E-12 |
| SBSN     | 0.319379 | 4.42E-27 | PIMREG    | 0.222337 | 1.38E-13 | TMEM25  | -0.2114  | 2.14E-12 |
| MAB21L4  | 0.318341 | 6.61E-27 | GRHL1     | 0.222313 | 1.39E-13 | N4BP2L2 | -0.21152 | 2.07E-12 |
| KRT81    | 0.317284 | 9.92E-27 | CENPW     | 0.22208  | 1.48E-13 | GASK1B  | -0.21155 | 2.06E-12 |
| MUC21    | 0.315917 | 1.68E-26 | UTP4      | 0.222055 | 1.49E-13 | MYOZ3   | -0.2118  | 1.94E-12 |
| ANLN     | 0.315608 | 1.89E-26 | PADI1     | 0.221983 | 1.52E-13 | TCTN1   | -0.21207 | 1.81E-12 |
| USB1     | 0.313459 | 4.27E-26 | DBF4      | 0.221703 | 1.63E-13 | PHF21A  | -0.21218 | 1.77E-12 |
| SLC2A1   | 0.313455 | 4.27E-26 | SMIM13    | 0.22149  | 1.72E-13 | ZNF25   | -0.21221 | 1.75E-12 |
| CBX2     | 0.31312  | 4.85E-26 | SLC22A20P | 0.221418 | 1.75E-13 | FAM81B  | -0.21225 | 1.74E-12 |
| PTTG1IP  | 0.313029 | 5.02E-26 | SUV39H1   | 0.221416 | 1.75E-13 | BMPR1B  | -0.21236 | 1.69E-12 |
| INAVA    | 0.312572 | 5.97E-26 | RHCG      | 0.221343 | 1.79E-13 | RETREG1 | -0.21284 | 1.50E-12 |
| NRBP1    | 0.311945 | 7.56E-26 | FAM171A2  | 0.221286 | 1.81E-13 | FHIT    | -0.21298 | 1.45E-12 |
| SLURP1   | 0.310927 | 1.11E-25 | PPM1G     | 0.221279 | 1.82E-13 | SLITRK6 | -0.21301 | 1.44E-12 |
| ULBP2    | 0.310602 | 1.25E-25 | NUF2      | 0.221231 | 1.84E-13 | RAB17   | -0.21327 | 1.35E-12 |
| SLC6A17  | 0.309904 | 1.62E-25 | KRT6A     | 0.221203 | 1.85E-13 | CCDC91  | -0.21351 | 1.27E-12 |
| KCNG1    | 0.309536 | 1.86E-25 | VSTM2L    | 0.220948 | 1.98E-13 | IGBP1   | -0.21356 | 1.26E-12 |
| LAD1     | 0.309383 | 1.97E-25 | NRBF2     | 0.220912 | 1.99E-13 | CHN2    | -0.2136  | 1.25E-12 |
| TMEM189  | 0.308315 | 2.93E-25 | C10ORF55  | 0.22091  | 1.99E-13 | CCNDBP1 | -0.21367 | 1.23E-12 |

|          |          |          |        |          |          |           |          |          |
|----------|----------|----------|--------|----------|----------|-----------|----------|----------|
| B3GNT4   | 0.307321 | 4.24E-25 | MND1   | 0.220822 | 2.04E-13 | KYAT1     | -0.21367 | 1.23E-12 |
| PTPRU    | 0.307094 | 4.61E-25 | DDX39A | 0.220811 | 2.05E-13 | TRMO      | -0.2137  | 1.22E-12 |
| MMP1     | 0.307004 | 4.77E-25 | GPR87  | 0.220759 | 2.07E-13 | STRADB    | -0.21374 | 1.21E-12 |
| AUNIP    | 0.306741 | 5.25E-25 | NDC80  | 0.220716 | 2.10E-13 | BECN1     | -0.21375 | 1.20E-12 |
| ADGRF4   | 0.305603 | 7.99E-25 | CDH3   | 0.220622 | 2.15E-13 | PCM1      | -0.21394 | 1.15E-12 |
| S100A11  | 0.305366 | 8.71E-25 | DESI2  | 0.220549 | 2.19E-13 | HPN       | -0.214   | 1.13E-12 |
| PSMD7    | 0.304877 | 1.04E-24 | TAF7L  | 0.22051  | 2.21E-13 | LYPD6B    | -0.21406 | 1.11E-12 |
| TPD52L2  | 0.304389 | 1.25E-24 | SLPI   | 0.220412 | 2.26E-13 | THAP6     | -0.21427 | 1.06E-12 |
| KCTD5    | 0.303257 | 1.88E-24 | TAF4   | 0.220351 | 2.30E-13 | DEFB132   | -0.21454 | 9.88E-13 |
| ATP6V1C2 | 0.303245 | 1.89E-24 | TMEM54 | 0.220341 | 2.31E-13 | METTL25   | -0.21455 | 9.87E-13 |
| CALML5   | 0.302273 | 2.69E-24 | MRPL15 | 0.220297 | 2.33E-13 | RAPGEF3   | -0.21463 | 9.66E-13 |
| ORC6     | 0.301677 | 3.34E-24 | VGFB   | 0.220173 | 2.41E-13 | ZBTB25    | -0.21464 | 9.65E-13 |
| SLC7A5   | 0.299955 | 6.21E-24 | GPI    | 0.220136 | 2.43E-13 | LINC00957 | -0.21464 | 9.65E-13 |
| UPK2     | 0.299895 | 6.35E-24 | LRRC59 | 0.220042 | 2.49E-13 | TMEM9B    | -0.21495 | 8.93E-13 |
| KRT83    | 0.298666 | 9.86E-24 | AGO2   | 0.22003  | 2.50E-13 | FBXL5     | -0.21503 | 8.76E-13 |
| CLIC3    | 0.297897 | 1.30E-23 | SRPK3  | 0.219786 | 2.66E-13 | CPB1      | -0.21527 | 8.25E-13 |
| PLEKHN1  | 0.296856 | 1.88E-23 | TBC1D7 | 0.219757 | 2.67E-13 | PHYHD1    | -0.21528 | 8.24E-13 |
| MYBL2    | 0.296656 | 2.02E-23 | CCNE2  | 0.219748 | 2.68E-13 | ABHD10    | -0.21529 | 8.21E-13 |
| RAET1L   | 0.29615  | 2.41E-23 | SCAF4  | 0.219585 | 2.79E-13 | KLHDC2    | -0.21543 | 7.93E-13 |
| B3GNT7   | 0.295867 | 2.67E-23 | FAM72B | 0.219584 | 2.79E-13 | EPHX2     | -0.21573 | 7.35E-13 |
| S100A7A  | 0.29529  | 3.27E-23 | TAS1R3 | 0.219493 | 2.86E-13 | NXPE3     | -0.2158  | 7.23E-13 |
| DNMT3B   | 0.294154 | 4.88E-23 | GGH    | 0.219482 | 2.87E-13 | RPGR      | -0.21591 | 7.03E-13 |
| MYH14    | 0.29368  | 5.76E-23 | RAET1G | 0.21947  | 2.88E-13 | ATP6V1G2  | -0.21596 | 6.94E-13 |
| RCC1     | 0.293256 | 6.68E-23 | C1QL4  | 0.219357 | 2.96E-13 | CCDC30    | -0.21602 | 6.85E-13 |
| IVL      | 0.293057 | 7.16E-23 | SGO1   | 0.219305 | 3.00E-13 | C6ORF201  | -0.21602 | 6.85E-13 |

|          |          |          |          |          |          |          |          |          |
|----------|----------|----------|----------|----------|----------|----------|----------|----------|
| PFKP     | 0.293018 | 7.26E-23 | FAM47C   | 0.219264 | 3.03E-13 | HPS4     | -0.2162  | 6.55E-13 |
| PPP2R2C  | 0.292879 | 7.62E-23 | CSNK2A2  | 0.219245 | 3.05E-13 | MAOA     | -0.21621 | 6.53E-13 |
| UNC13D   | 0.292831 | 7.75E-23 | TONSL    | 0.219205 | 3.08E-13 | PIH1D2   | -0.21623 | 6.51E-13 |
| DONSON   | 0.292705 | 8.10E-23 | ZNF217   | 0.219196 | 3.08E-13 | ANKS1B   | -0.21636 | 6.29E-13 |
| KCTD15   | 0.292657 | 8.24E-23 | FUT6     | 0.219053 | 3.20E-13 | ZNF763   | -0.21638 | 6.25E-13 |
| NCS1     | 0.292447 | 8.86E-23 | TMEM65   | 0.218945 | 3.29E-13 | FAN1     | -0.2164  | 6.22E-13 |
| ZNF488   | 0.290959 | 1.49E-22 | KIF4B    | 0.218898 | 3.33E-13 | ARL6     | -0.21647 | 6.11E-13 |
| PGLYRP4  | 0.290403 | 1.80E-22 | LMO1     | 0.21875  | 3.45E-13 | PCBD2    | -0.21654 | 6.02E-13 |
| TICRR    | 0.290303 | 1.87E-22 | MYL12A   | 0.218727 | 3.47E-13 | DYNC2H1  | -0.21662 | 5.90E-13 |
| DGCR5    | 0.290297 | 1.87E-22 | SLC28A1  | 0.218674 | 3.52E-13 | MYL5     | -0.21668 | 5.81E-13 |
| LSR      | 0.289995 | 2.08E-22 | FZD9     | 0.218586 | 3.60E-13 | SAMD15   | -0.2167  | 5.77E-13 |
| L1CAM    | 0.289539 | 2.43E-22 | EFNA2    | 0.218527 | 3.65E-13 | HEMK1    | -0.21676 | 5.69E-13 |
| CPA4     | 0.289537 | 2.43E-22 | AVEN     | 0.218399 | 3.77E-13 | WDR35    | -0.21692 | 5.46E-13 |
| EPOP     | 0.288649 | 3.30E-22 | CDC25A   | 0.218276 | 3.89E-13 | CENPP    | -0.21694 | 5.45E-13 |
| MCM4     | 0.287936 | 4.21E-22 | NCAPH    | 0.21827  | 3.90E-13 | NAT1     | -0.21727 | 5.01E-13 |
| AURKA    | 0.287528 | 4.85E-22 | ULBP3    | 0.218178 | 3.99E-13 | CCDC173  | -0.21728 | 5.00E-13 |
| CABLES2  | 0.287264 | 5.30E-22 | RAD54L   | 0.218131 | 4.03E-13 | PTCD2    | -0.21777 | 4.42E-13 |
| SHCBP1   | 0.287101 | 5.61E-22 | CDCA3    | 0.217893 | 4.28E-13 | GATA3    | -0.2182  | 3.96E-13 |
| SLC44A2  | 0.286525 | 6.82E-22 | RTKN2    | 0.217822 | 4.36E-13 | ZNF620   | -0.21824 | 3.92E-13 |
| CAVIN4   | 0.286323 | 7.31E-22 | RAB22A   | 0.21749  | 4.74E-13 | DUSP28   | -0.2183  | 3.87E-13 |
| AIF1L    | 0.285935 | 8.34E-22 | GPR37L1  | 0.217412 | 4.83E-13 | NUDT16P1 | -0.21837 | 3.80E-13 |
| CENPN    | 0.285817 | 8.68E-22 | ANKRD34B | 0.21731  | 4.96E-13 | AUH      | -0.21838 | 3.79E-13 |
| A2ML1    | 0.285591 | 9.37E-22 | H2BFXP   | 0.21728  | 5.00E-13 | RASA4CP  | -0.2186  | 3.59E-13 |
| ASS1     | 0.284967 | 1.16E-21 | HCCS     | 0.217272 | 5.01E-13 | GRIA1    | -0.2187  | 3.49E-13 |
| C15ORF39 | 0.284865 | 1.20E-21 | P2RY6    | 0.21716  | 5.15E-13 | SIAH2    | -0.2187  | 3.49E-13 |

|          |          |          |          |          |          |          |          |          |
|----------|----------|----------|----------|----------|----------|----------|----------|----------|
| ULBP1    | 0.284313 | 1.44E-21 | TMEM158  | 0.217118 | 5.20E-13 | GLCCI1   | -0.21881 | 3.40E-13 |
| CDCA8    | 0.283874 | 1.67E-21 | ACTB     | 0.216793 | 5.65E-13 | DMAC2L   | -0.21883 | 3.38E-13 |
| GABBR2   | 0.283495 | 1.90E-21 | SH2B2    | 0.216587 | 5.94E-13 | MEIS3P1  | -0.21885 | 3.37E-13 |
| RBM38    | 0.282767 | 2.43E-21 | MYD88    | 0.216566 | 5.97E-13 | ZCWPW2   | -0.21904 | 3.21E-13 |
| TMEM79   | 0.282108 | 3.03E-21 | YWHAZ    | 0.216562 | 5.98E-13 | AP1AR    | -0.21929 | 3.01E-13 |
| RFWD3    | 0.282053 | 3.09E-21 | PLAAT1   | 0.216507 | 6.06E-13 | TBC1D14  | -0.21943 | 2.91E-13 |
| TMEM105  | 0.280096 | 5.92E-21 | KLHDC7B  | 0.216464 | 6.13E-13 | CFAP44   | -0.21945 | 2.89E-13 |
| S100A9   | 0.280045 | 6.02E-21 | CLDN7    | 0.216455 | 6.14E-13 | LANCL1   | -0.21965 | 2.75E-13 |
| ABCD1    | 0.279597 | 6.99E-21 | CALU     | 0.216352 | 6.30E-13 | FBP1     | -0.21991 | 2.57E-13 |
| GINS3    | 0.279389 | 7.49E-21 | CCK      | 0.216272 | 6.43E-13 | FAM227B  | -0.22017 | 2.41E-13 |
| GAL      | 0.27921  | 7.94E-21 | GJB4     | 0.21626  | 6.45E-13 | BBS4     | -0.22059 | 2.17E-13 |
| SLC16A13 | 0.279165 | 8.06E-21 | NECTIN4  | 0.216151 | 6.63E-13 | USP30    | -0.22059 | 2.17E-13 |
| S100P    | 0.279059 | 8.35E-21 | RRP1B    | 0.216145 | 6.64E-13 | CAMK1    | -0.22061 | 2.15E-13 |
| GATA5    | 0.278924 | 8.73E-21 | GTF2IRD1 | 0.215965 | 6.94E-13 | AGTR1    | -0.22085 | 2.03E-13 |
| NUTF2    | 0.278676 | 9.47E-21 | TUBA1B   | 0.215852 | 7.14E-13 | KCNE4    | -0.22092 | 1.99E-13 |
| TLE1     | 0.278237 | 1.09E-20 | ALYREF   | 0.215821 | 7.19E-13 | MAP3K12  | -0.22108 | 1.91E-13 |
| GALNS    | 0.278229 | 1.10E-20 | ASCL2    | 0.215365 | 8.06E-13 | TMEM161B | -0.22115 | 1.88E-13 |
| MMP15    | 0.277828 | 1.25E-20 | MCU      | 0.215297 | 8.19E-13 | ARL17A   | -0.22115 | 1.88E-13 |
| FAM83D   | 0.277797 | 1.27E-20 | AADAT    | 0.215211 | 8.37E-13 | SNX1     | -0.22163 | 1.66E-13 |
| STIL     | 0.277603 | 1.35E-20 | TUBB6    | 0.214995 | 8.83E-13 | MAML3    | -0.22187 | 1.56E-13 |
| RASGRF1  | 0.277597 | 1.35E-20 | SPINDOC  | 0.214807 | 9.25E-13 | LIAS     | -0.22203 | 1.50E-13 |
| S100A8   | 0.277567 | 1.36E-20 | DUS2     | 0.214714 | 9.47E-13 | FAM172A  | -0.22213 | 1.46E-13 |
| CLDN9    | 0.276091 | 2.21E-20 | CPPED1   | 0.214512 | 9.96E-13 | RBM5     | -0.22214 | 1.45E-13 |
| KRT86    | 0.275703 | 2.51E-20 | GJB5     | 0.214398 | 1.02E-12 | TMEM128  | -0.22247 | 1.34E-13 |
| KREMEN2  | 0.27517  | 2.99E-20 | SPNS2    | 0.214384 | 1.03E-12 | ZNF540   | -0.22251 | 1.32E-13 |

|         |          |          |           |          |          |           |          |          |
|---------|----------|----------|-----------|----------|----------|-----------|----------|----------|
| NXP4    | 0.275098 | 3.06E-20 | TUBB      | 0.214067 | 1.11E-12 | C2ORF73   | -0.22258 | 1.30E-13 |
| STK38   | 0.275055 | 3.10E-20 | RNF222    | 0.21404  | 1.12E-12 | FBX04     | -0.2226  | 1.29E-13 |
| PLK1    | 0.274987 | 3.17E-20 | PSME4     | 0.213985 | 1.13E-12 | CLDN12    | -0.22336 | 1.06E-13 |
| TMEM51  | 0.274472 | 3.75E-20 | OLFM2     | 0.213954 | 1.14E-12 | SYT9      | -0.22347 | 1.03E-13 |
| MTSS2   | 0.273965 | 4.41E-20 | FIBCD1    | 0.213925 | 1.15E-12 | ZNF493    | -0.22353 | 1.02E-13 |
| NTAN1   | 0.2737   | 4.81E-20 | LINC01096 | 0.213899 | 1.16E-12 | PATZ1     | -0.22362 | 9.94E-14 |
| UBE2C   | 0.273576 | 5.00E-20 | DDX28     | 0.213673 | 1.22E-12 | HEBP1     | -0.2239  | 9.24E-14 |
| CIB2    | 0.273364 | 5.36E-20 | YWHAQ     | 0.213634 | 1.24E-12 | LINC02381 | -0.22401 | 8.98E-14 |
| ERCC6L  | 0.273184 | 5.68E-20 | CTNNBIP1  | 0.213633 | 1.24E-12 | SNRPN     | -0.22406 | 8.88E-14 |
| NXN     | 0.27317  | 5.70E-20 | CLDN4     | 0.213541 | 1.27E-12 | ARHGEF3   | -0.22417 | 8.62E-14 |
| MESP2   | 0.273074 | 5.88E-20 | SLC35A2   | 0.213474 | 1.29E-12 | NAPB      | -0.2242  | 8.55E-14 |
| DIRAS1  | 0.272701 | 6.63E-20 | DTNA      | 0.213425 | 1.30E-12 | DTX3      | -0.22421 | 8.54E-14 |
| CFAP20  | 0.271796 | 8.87E-20 | CHFR      | 0.213309 | 1.34E-12 | RAB30     | -0.22426 | 8.42E-14 |
| SUMO3   | 0.271517 | 9.70E-20 | PXDC1     | 0.213167 | 1.39E-12 | ZNF214    | -0.22439 | 8.15E-14 |
| RAP2B   | 0.270809 | 1.22E-19 | ADARB1    | 0.213116 | 1.40E-12 | PWARSN    | -0.22454 | 7.83E-14 |
| GAN     | 0.270406 | 1.38E-19 | CCNA2     | 0.213107 | 1.41E-12 | DCAF16    | -0.22483 | 7.26E-14 |
| PCP4L1  | 0.27025  | 1.45E-19 | RASGEF1C  | 0.213093 | 1.41E-12 | ANGEL1    | -0.22489 | 7.16E-14 |
| CPNE2   | 0.269977 | 1.59E-19 | DEPDC1    | 0.213065 | 1.42E-12 | NME5      | -0.22497 | 7.00E-14 |
| S100A10 | 0.269964 | 1.59E-19 | EBP       | 0.213008 | 1.44E-12 | N4BP2L1   | -0.22505 | 6.87E-14 |
| ACTN4   | 0.269927 | 1.61E-19 | SYT16     | 0.212703 | 1.55E-12 | AFF3      | -0.22505 | 6.87E-14 |
| MELK    | 0.269633 | 1.77E-19 | CARM1     | 0.212649 | 1.57E-12 | WDR6      | -0.22549 | 6.13E-14 |
| RASAL1  | 0.269529 | 1.83E-19 | UHRF1     | 0.21225  | 1.74E-12 | TLE3      | -0.2257  | 5.79E-14 |
| SOX11   | 0.269469 | 1.86E-19 | ANKRD27   | 0.211951 | 1.87E-12 | ATP6AP1L  | -0.22575 | 5.71E-14 |
| SPSB1   | 0.269124 | 2.08E-19 | REEP4     | 0.211836 | 1.92E-12 | NMNAT3    | -0.22575 | 5.71E-14 |
| PSCA    | 0.268993 | 2.17E-19 | SRD5A1    | 0.211772 | 1.95E-12 | AGR3      | -0.22606 | 5.27E-14 |

|          |          |          |           |          |          |           |          |          |
|----------|----------|----------|-----------|----------|----------|-----------|----------|----------|
| CDC42BPG | 0.268589 | 2.46E-19 | RAE1      | 0.211769 | 1.95E-12 | NEK9      | -0.22614 | 5.17E-14 |
| CIAPIN1  | 0.268515 | 2.52E-19 | NUDT8     | 0.211654 | 2.01E-12 | LINC02447 | -0.22619 | 5.09E-14 |
| RRM2     | 0.268506 | 2.53E-19 | MGC2889   | 0.211648 | 2.01E-12 | CCNG1     | -0.2262  | 5.09E-14 |
| MTRFR2   | 0.268186 | 2.80E-19 | PTPRH     | 0.211638 | 2.02E-12 | ANOS1     | -0.22635 | 4.89E-14 |
| FANCA    | 0.267041 | 4.01E-19 | TTYH3     | 0.211489 | 2.09E-12 | ALKBH8    | -0.22659 | 4.59E-14 |
| EMC8     | 0.266949 | 4.13E-19 | FXVD5     | 0.211467 | 2.10E-12 | DEGS2     | -0.22687 | 4.27E-14 |
| SLC66A3  | 0.26693  | 4.16E-19 | ABTB2     | 0.211341 | 2.17E-12 | CDK17     | -0.22717 | 3.94E-14 |
| PERP     | 0.266787 | 4.35E-19 | TRIB3     | 0.211231 | 2.23E-12 | POLL      | -0.2275  | 3.62E-14 |
| JPT1     | 0.266394 | 4.92E-19 | FAM110A   | 0.211106 | 2.30E-12 | POLN      | -0.22784 | 3.30E-14 |
| CDCA2    | 0.266048 | 5.48E-19 | SERPINH1  | 0.210907 | 2.41E-12 | METTL15   | -0.22787 | 3.28E-14 |
| MGAT5B   | 0.265844 | 5.84E-19 | USP6NL    | 0.210822 | 2.46E-12 | C2CD5     | -0.22799 | 3.17E-14 |
| RSU1     | 0.265707 | 6.09E-19 | CDH16     | 0.2108   | 2.47E-12 | LYPD6     | -0.22815 | 3.05E-14 |
| WNT3A    | 0.265017 | 7.56E-19 | SHMT2     | 0.210769 | 2.49E-12 | TMBIM4    | -0.22817 | 3.03E-14 |
| TH       | 0.264912 | 7.81E-19 | USP39     | 0.210694 | 2.54E-12 | BBS12     | -0.22823 | 2.98E-14 |
| IQGAP3   | 0.264162 | 9.86E-19 | KDELR3    | 0.210584 | 2.61E-12 | CLGN      | -0.22826 | 2.96E-14 |
| CBFB     | 0.263795 | 1.10E-18 | CDK16     | 0.210583 | 2.61E-12 | CYP21A2   | -0.22826 | 2.95E-14 |
| OVOL1    | 0.263659 | 1.15E-18 | HASPIN    | 0.21051  | 2.65E-12 | RNASE4    | -0.22886 | 2.52E-14 |
| VPS35    | 0.263502 | 1.21E-18 | SEPTIN3   | 0.210499 | 2.66E-12 | TXNDC15   | -0.22922 | 2.29E-14 |
| P4HA2    | 0.263195 | 1.33E-18 | CARHSP1   | 0.210461 | 2.68E-12 | CYFIP2    | -0.22926 | 2.27E-14 |
| ZSWIM4   | 0.263193 | 1.33E-18 | EFS       | 0.210452 | 2.69E-12 | CRY2      | -0.22936 | 2.21E-14 |
| CDC20    | 0.263018 | 1.41E-18 | ARID3C    | 0.210424 | 2.71E-12 | SLC25A12  | -0.22937 | 2.20E-14 |
| ANXA4    | 0.262821 | 1.49E-18 | MPHOSPH10 | 0.210421 | 2.71E-12 | ETNPPL    | -0.22945 | 2.16E-14 |
| CLDN14   | 0.262638 | 1.58E-18 | LMNB2     | 0.210363 | 2.75E-12 | XBP1      | -0.22958 | 2.08E-14 |
| GUCA1A   | 0.262635 | 1.58E-18 | FOSL1     | 0.21035  | 2.76E-12 | BBS5      | -0.22993 | 1.90E-14 |
| PBDC1    | 0.262604 | 1.60E-18 | ATP11A    | 0.210334 | 2.77E-12 | ABHD14A   | -0.22994 | 1.89E-14 |

|           |          |          |          |          |          |        |          |          |
|-----------|----------|----------|----------|----------|----------|--------|----------|----------|
| CDC25B    | 0.262537 | 1.63E-18 | EHD1     | 0.210322 | 2.78E-12 | PJA2   | -0.23036 | 1.69E-14 |
| RAD51     | 0.262463 | 1.67E-18 | RBM17    | 0.210168 | 2.88E-12 | POMT2  | -0.2305  | 1.63E-14 |
| CDR2      | 0.26238  | 1.71E-18 | CEBPB    | 0.21013  | 2.91E-12 | LONRF2 | -0.23072 | 1.54E-14 |
| PSMA7     | 0.262223 | 1.80E-18 | CASP14   | 0.210021 | 2.99E-12 | OCIAD1 | -0.23088 | 1.47E-14 |
| PLCB3     | 0.261821 | 2.03E-18 | HSPA14   | 0.20995  | 3.04E-12 | DOK1   | -0.23089 | 1.47E-14 |
| GNAS      | 0.261605 | 2.17E-18 | THEG     | 0.209885 | 3.09E-12 | DCLK1  | -0.23107 | 1.40E-14 |
| TEX30     | 0.261508 | 2.24E-18 | BORA     | 0.209792 | 3.16E-12 | ZNF141 | -0.23111 | 1.39E-14 |
| NSDHL     | 0.26148  | 2.26E-18 | PITPNM3  | 0.209564 | 3.34E-12 | ASB16  | -0.23111 | 1.39E-14 |
| MPHOSPH6  | 0.26146  | 2.27E-18 | OPN3     | 0.209563 | 3.34E-12 | ZNF516 | -0.2313  | 1.32E-14 |
| UNC93A    | 0.260923 | 2.68E-18 | FAM72D   | 0.209562 | 3.34E-12 | PARP3  | -0.23158 | 1.22E-14 |
| TTK       | 0.260066 | 3.48E-18 | ACTL8    | 0.209562 | 3.34E-12 | LZTFL1 | -0.23181 | 1.15E-14 |
| KIF4A     | 0.260062 | 3.48E-18 | RAB51F   | 0.209547 | 3.35E-12 | LRRC49 | -0.23186 | 1.13E-14 |
| NDRG4     | 0.25981  | 3.76E-18 | ADAM9    | 0.209518 | 3.37E-12 | CGRRF1 | -0.2319  | 1.12E-14 |
| TMSB10    | 0.259679 | 3.91E-18 | CCT5     | 0.209397 | 3.47E-12 | THSD4  | -0.23213 | 1.05E-14 |
| LINC01588 | 0.259523 | 4.10E-18 | ABCA12   | 0.209022 | 3.80E-12 | MDH1B  | -0.23214 | 1.05E-14 |
| CHRM1     | 0.259431 | 4.22E-18 | DHX38    | 0.208938 | 3.88E-12 | RAMP2  | -0.23251 | 9.50E-15 |
| BUB1      | 0.258843 | 5.04E-18 | UBE2T    | 0.208854 | 3.96E-12 | ANKAR  | -0.23265 | 9.16E-15 |
| SUSD2     | 0.258817 | 5.09E-18 | S1PR5    | 0.208832 | 3.98E-12 | GLRB   | -0.23272 | 8.98E-15 |
| MESP1     | 0.258801 | 5.11E-18 | DMRT1    | 0.208751 | 4.06E-12 | RAD17  | -0.23274 | 8.94E-15 |
| KIF1A     | 0.258656 | 5.34E-18 | PCSK1N   | 0.208615 | 4.19E-12 | NAP1L5 | -0.2332  | 7.89E-15 |
| HJURP     | 0.258246 | 6.04E-18 | MACC1    | 0.208613 | 4.19E-12 | KBTBD3 | -0.23334 | 7.61E-15 |
| MFAP3L    | 0.258169 | 6.19E-18 | MYPN     | 0.208538 | 4.27E-12 | TRIM66 | -0.23338 | 7.53E-15 |
| CCNB2     | 0.25811  | 6.30E-18 | AMER1    | 0.208494 | 4.31E-12 | NADK2  | -0.23341 | 7.46E-15 |
| SAPCD2    | 0.258096 | 6.33E-18 | TMEM151A | 0.208445 | 4.37E-12 | ECI2   | -0.23355 | 7.18E-15 |
| SF3B3     | 0.257893 | 6.73E-18 | ITPR3    | 0.208443 | 4.37E-12 | NTN4   | -0.23359 | 7.10E-15 |

|          |          |          |         |          |          |           |          |          |
|----------|----------|----------|---------|----------|----------|-----------|----------|----------|
| FRMD8    | 0.25717  | 8.36E-18 | CFDP1   | 0.208192 | 4.64E-12 | CYP4X1    | -0.23365 | 6.99E-15 |
| KLRG2    | 0.257097 | 8.55E-18 | TMC6    | 0.208055 | 4.79E-12 | DNAH7     | -0.23382 | 6.66E-15 |
| HES2     | 0.25675  | 9.49E-18 | CCDC168 | 0.207998 | 4.86E-12 | SPAG8     | -0.23407 | 6.23E-15 |
| PADI2    | 0.256412 | 1.05E-17 | MSANTD3 | 0.207986 | 4.87E-12 | NBEA      | -0.23421 | 6.01E-15 |
| SLC52A2  | 0.256005 | 1.19E-17 | POC1A   | 0.207959 | 4.90E-12 | CYB5A     | -0.23427 | 5.90E-15 |
| MUC5B    | 0.255972 | 1.20E-17 | CDK1    | 0.207952 | 4.91E-12 | DYNC2LI1  | -0.23458 | 5.42E-15 |
| FAM83B   | 0.255829 | 1.25E-17 | FAM131C | 0.207946 | 4.92E-12 | 8-Mar     | -0.23495 | 4.91E-15 |
| C11ORF86 | 0.255668 | 1.31E-17 | GTSE1   | 0.207924 | 4.95E-12 | TUBG2     | -0.23514 | 4.66E-15 |
| PKMYT1   | 0.25561  | 1.34E-17 | SH3GL3  | 0.20786  | 5.02E-12 | BHLHE40   | -0.23534 | 4.41E-15 |
| PERM1    | 0.255542 | 1.36E-17 | BAK1    | 0.207779 | 5.12E-12 | CST9      | -0.23545 | 4.27E-15 |
| CHMP1A   | 0.255501 | 1.38E-17 | DNAJB1  | 0.207776 | 5.12E-12 | PLA2G12A  | -0.23559 | 4.12E-15 |
| CENPA    | 0.255383 | 1.43E-17 | DIAPH3  | 0.20764  | 5.29E-12 | LRTOMT    | -0.23595 | 3.73E-15 |
| NHSL1    | 0.255284 | 1.47E-17 | CIAO2B  | 0.207591 | 5.36E-12 | SOX2-OT   | -0.23596 | 3.73E-15 |
| KIF2C    | 0.255079 | 1.57E-17 | ZC3H18  | 0.207577 | 5.37E-12 | CYBRD1    | -0.23597 | 3.71E-15 |
| COL13A1  | 0.25471  | 1.75E-17 | ZNF185  | 0.207555 | 5.40E-12 | C3ORF18   | -0.23618 | 3.51E-15 |
| HEBP2    | 0.253676 | 2.38E-17 | EDC4    | 0.207534 | 5.43E-12 | INTU      | -0.23622 | 3.47E-15 |
| ADGRG6   | 0.253319 | 2.64E-17 | CLTCL1  | 0.207519 | 5.45E-12 | CCDC170   | -0.23624 | 3.45E-15 |
| NOTCH1   | 0.2533   | 2.66E-17 | RHBDF2  | 0.207505 | 5.47E-12 | DNAJC19   | -0.23631 | 3.38E-15 |
| PGBD5    | 0.25312  | 2.80E-17 | PRDX1   | 0.207329 | 5.70E-12 | CCDC158   | -0.23646 | 3.25E-15 |
| ELOVL1   | 0.252967 | 2.93E-17 | SAE1    | 0.207283 | 5.76E-12 | ZNF182    | -0.2369  | 2.88E-15 |
| DLX3     | 0.252939 | 2.96E-17 | DSCC1   | 0.207277 | 5.77E-12 | GRIK1-AS1 | -0.23697 | 2.82E-15 |
| UBXN2A   | 0.252921 | 2.97E-17 | CHD5    | 0.20716  | 5.94E-12 | KANSL3    | -0.23709 | 2.73E-15 |
| CNIH2    | 0.252366 | 3.50E-17 | MSL3P1  | 0.207124 | 5.99E-12 | CPLX1     | -0.23719 | 2.66E-15 |
| GPRIN1   | 0.252305 | 3.57E-17 | RSPO4   | 0.206992 | 6.18E-12 | CASD1     | -0.23724 | 2.62E-15 |
| KRT78    | 0.251799 | 4.14E-17 | CA5BP1  | 0.206844 | 6.40E-12 | ZNF483    | -0.23757 | 2.39E-15 |

|           |          |          |               |          |          |            |          |          |
|-----------|----------|----------|---------------|----------|----------|------------|----------|----------|
| CDCA4     | 0.251416 | 4.63E-17 | CLSPN         | 0.206704 | 6.62E-12 | MBLAC2     | -0.23772 | 2.29E-15 |
| TPM3      | 0.251392 | 4.67E-17 | PRC1          | 0.206601 | 6.78E-12 | IGIP       | -0.23777 | 2.26E-15 |
| CDT1      | 0.251292 | 4.80E-17 | KIF18A        | 0.206492 | 6.96E-12 | DLG4       | -0.23782 | 2.23E-15 |
| LINC00592 | 0.25117  | 4.98E-17 | DNMT3A        | 0.206399 | 7.11E-12 | PSD4       | -0.23811 | 2.06E-15 |
| VAC14     | 0.251146 | 5.01E-17 | MSL3          | 0.206358 | 7.18E-12 | NUDT16     | -0.2382  | 2.01E-15 |
| SNAI1     | 0.25086  | 5.45E-17 | CCZ1P-OR7E38P | 0.206352 | 7.19E-12 | CD302      | -0.23833 | 1.94E-15 |
| CRYBG2    | 0.250265 | 6.49E-17 | GINS4         | 0.206212 | 7.44E-12 | ARHGAP35   | -0.23837 | 1.91E-15 |
| CSTB      | 0.250192 | 6.63E-17 | PRIM2         | 0.206176 | 7.50E-12 | DPY19L2P4  | -0.23862 | 1.79E-15 |
| CCNF      | 0.249813 | 7.40E-17 | FLVCR2        | 0.206057 | 7.72E-12 | FBXL17     | -0.23877 | 1.71E-15 |
| VGLL1     | 0.2498   | 7.43E-17 | PPP4C         | 0.205965 | 7.89E-12 | ANKRD42    | -0.23895 | 1.63E-15 |
| SRC       | 0.24977  | 7.50E-17 | RTN4R         | 0.205949 | 7.91E-12 | NICN1      | -0.23992 | 1.25E-15 |
| TMEM132A  | 0.249707 | 7.64E-17 | KLK5          | 0.20592  | 7.97E-12 | ACBD4      | -0.24078 | 9.80E-16 |
| LRRC3     | 0.249673 | 7.71E-17 | MFGE8         | 0.205845 | 8.11E-12 | CFAP61     | -0.24081 | 9.72E-16 |
| TES       | 0.249581 | 7.92E-17 | NRTN          | 0.205833 | 8.14E-12 | PCAT18     | -0.24136 | 8.33E-16 |
| MCM10     | 0.249432 | 8.27E-17 | SECTM1        | 0.205689 | 8.42E-12 | LTA4H      | -0.24139 | 8.25E-16 |
| E2F2      | 0.249387 | 8.39E-17 | UBE2I         | 0.20565  | 8.50E-12 | GLYATL1    | -0.2414  | 8.23E-16 |
| DDX27     | 0.249191 | 8.87E-17 | MRPS6         | 0.205624 | 8.55E-12 | ZBTB4      | -0.24159 | 7.81E-16 |
| CHAC1     | 0.248977 | 9.45E-17 | SLC9A2        | 0.205546 | 8.71E-12 | POLI       | -0.24201 | 6.93E-16 |
| OSBPL2    | 0.24892  | 9.60E-17 | ESYT3         | 0.205453 | 8.90E-12 | DNAAF4     | -0.24217 | 6.63E-16 |
| RIPK4     | 0.248878 | 9.72E-17 | PWP2          | 0.20541  | 8.99E-12 | ATP1A1-AS1 | -0.24267 | 5.75E-16 |
| KIF23     | 0.248758 | 1.01E-16 | MARVELD3      | 0.205145 | 9.57E-12 | NEDD4L     | -0.24276 | 5.61E-16 |
| CSMD2     | 0.248265 | 1.16E-16 | PAQR4         | 0.205056 | 9.78E-12 | TRIM52     | -0.24329 | 4.83E-16 |
| DLL3      | 0.248206 | 1.18E-16 | UBE2S         | 0.205052 | 9.79E-12 | RNF157     | -0.24333 | 4.77E-16 |
| HTR1D     | 0.247965 | 1.27E-16 | SPRR1B        | 0.205024 | 9.85E-12 | SLC39A6    | -0.24374 | 4.26E-16 |
| PADI3     | 0.24785  | 1.31E-16 | POLQ          | 0.204862 | 1.02E-11 | NBR1       | -0.24385 | 4.12E-16 |

|           |          |          |            |          |          |              |          |          |
|-----------|----------|----------|------------|----------|----------|--------------|----------|----------|
| DHTKD1    | 0.247625 | 1.40E-16 | ETFA       | 0.204853 | 1.03E-11 | CYB5D1       | -0.24392 | 4.04E-16 |
| TNFSF9    | 0.247557 | 1.43E-16 | ACOT7      | 0.204828 | 1.03E-11 | TMEM232      | -0.24396 | 4.00E-16 |
| SLC5A6    | 0.247552 | 1.43E-16 | PDXK       | 0.204818 | 1.03E-11 | CPEB2        | -0.24401 | 3.94E-16 |
| TMEFF1    | 0.247534 | 1.43E-16 | GEN1       | 0.204807 | 1.04E-11 | DRC3         | -0.24413 | 3.81E-16 |
| TPX2      | 0.247453 | 1.47E-16 | IMPA2      | 0.204797 | 1.04E-11 | EZH1         | -0.24464 | 3.29E-16 |
| ST14      | 0.247369 | 1.50E-16 | TMEM51-AS1 | 0.204672 | 1.07E-11 | ICE2         | -0.24467 | 3.26E-16 |
| LCN2      | 0.247195 | 1.58E-16 | OGFOD1     | 0.20448  | 1.12E-11 | ESR1         | -0.24492 | 3.04E-16 |
| RGS9BP    | 0.247151 | 1.60E-16 | PSPH       | 0.204468 | 1.12E-11 | GMPR2        | -0.24551 | 2.57E-16 |
| TRIM47    | 0.247057 | 1.65E-16 | FANCI      | 0.204462 | 1.12E-11 | CBX7         | -0.24597 | 2.25E-16 |
| SEMA7A    | 0.246993 | 1.68E-16 | PDIA6      | 0.204427 | 1.13E-11 | COQ10A       | -0.24617 | 2.12E-16 |
| APOBEC3B  | 0.246474 | 1.95E-16 | SUV39H2    | 0.204225 | 1.19E-11 | TBC1D19      | -0.24623 | 2.09E-16 |
| C1ORF198  | 0.245988 | 2.24E-16 | AWAT2      | 0.204172 | 1.20E-11 | DNAJC24      | -0.24652 | 1.92E-16 |
| ELF4      | 0.245651 | 2.47E-16 | DTX2       | 0.204126 | 1.22E-11 | FUCA1        | -0.24676 | 1.79E-16 |
| PKP1      | 0.245607 | 2.50E-16 | TYRO3      | 0.203859 | 1.30E-11 | CCNG2        | -0.24694 | 1.70E-16 |
| TCHHL1    | 0.245451 | 2.61E-16 | TRIP13     | 0.20383  | 1.30E-11 | ARL14EP      | -0.24708 | 1.63E-16 |
| SKA3      | 0.245273 | 2.75E-16 | TREM1      | 0.203821 | 1.31E-11 | CST3         | -0.24728 | 1.54E-16 |
| ADRM1     | 0.245199 | 2.81E-16 | NRDC       | 0.203584 | 1.38E-11 | DNAL1        | -0.24767 | 1.38E-16 |
| PSMB2     | 0.244889 | 3.07E-16 | KLHL30     | 0.203545 | 1.39E-11 | SPOP         | -0.24771 | 1.36E-16 |
| EZH2      | 0.244781 | 3.16E-16 | HSPH1      | 0.203447 | 1.43E-11 | MYCBPAP      | -0.24778 | 1.34E-16 |
| POR       | 0.244688 | 3.25E-16 | LYPD3      | 0.203436 | 1.43E-11 | EPB41L4A-AS1 | -0.24789 | 1.30E-16 |
| SDCBP2    | 0.244442 | 3.48E-16 | BRD7       | 0.203394 | 1.44E-11 | SPATA6L      | -0.24791 | 1.29E-16 |
| TNFRSF12A | 0.244377 | 3.55E-16 | KLK7       | 0.203349 | 1.46E-11 | UNC119B      | -0.24857 | 1.06E-16 |
| NECTIN1   | 0.244245 | 3.68E-16 | KRT3       | 0.203078 | 1.56E-11 | ZNF280D      | -0.24867 | 1.03E-16 |
| LRP8      | 0.244202 | 3.73E-16 | APEX2      | 0.203023 | 1.58E-11 | IMPACT       | -0.24914 | 9.01E-17 |
| KRT16     | 0.243822 | 4.15E-16 | CCNB1      | 0.202951 | 1.60E-11 | SLC45A1      | -0.24918 | 8.91E-17 |

|         |          |          |           |          |          |           |          |          |
|---------|----------|----------|-----------|----------|----------|-----------|----------|----------|
| G6PD    | 0.243712 | 4.28E-16 | NANOS1    | 0.202833 | 1.65E-11 | LIFR      | -0.24918 | 8.90E-17 |
| PLAUR   | 0.243433 | 4.64E-16 | FER1L4    | 0.202783 | 1.67E-11 | LINCO0908 | -0.24924 | 8.76E-17 |
| ABCC2   | 0.243288 | 4.83E-16 | RDH13     | 0.202721 | 1.69E-11 | DNAJC12   | -0.24955 | 7.99E-17 |
| KPNA2   | 0.243136 | 5.04E-16 | EXOSC6    | 0.202571 | 1.75E-11 | IGFALS    | -0.24964 | 7.78E-17 |
| NTSR1   | 0.243113 | 5.08E-16 | TSPYL5    | 0.202471 | 1.79E-11 | TCEAL1    | -0.24979 | 7.46E-17 |
| KCNK12  | 0.242851 | 5.47E-16 | ATP2B2    | 0.202329 | 1.85E-11 | METAP1D   | -0.24987 | 7.28E-17 |
| CWH43   | 0.242833 | 5.50E-16 | KIFC3     | 0.202115 | 1.95E-11 | CHIC1     | -0.24992 | 7.18E-17 |
| ACOT9   | 0.242752 | 5.62E-16 | CRABP1    | 0.202035 | 1.98E-11 | ETFRF1    | -0.2501  | 6.80E-17 |
| CALHM3  | 0.242533 | 5.98E-16 | DLGAP3    | 0.202013 | 1.99E-11 | MRPS30    | -0.25046 | 6.13E-17 |
| NIPAL1  | 0.242528 | 5.99E-16 | FOXMI     | 0.201985 | 2.01E-11 | LINCO0324 | -0.25046 | 6.13E-17 |
| KCNN4   | 0.24217  | 6.63E-16 | HTATSF1   | 0.201867 | 2.06E-11 | EFCAB12   | -0.25111 | 5.06E-17 |
| AKR1B15 | 0.242166 | 6.63E-16 | BARX1     | 0.20183  | 2.08E-11 | MLEC      | -0.25115 | 5.01E-17 |
| DLGAP5  | 0.242018 | 6.92E-16 | NUDT5     | 0.201753 | 2.12E-11 | GNPDA2    | -0.25146 | 4.58E-17 |
| IGF2BP1 | 0.241828 | 7.30E-16 | SLC35C1   | 0.201649 | 2.17E-11 | ZNF226    | -0.25165 | 4.33E-17 |
| PHLDA2  | 0.241771 | 7.42E-16 | SPRR2D    | 0.201628 | 2.18E-11 | TTC14     | -0.25165 | 4.32E-17 |
| NELFCD  | 0.241722 | 7.52E-16 | TTC7A     | 0.201578 | 2.20E-11 | ZC3H6     | -0.25182 | 4.11E-17 |
| SLC30A3 | 0.241583 | 7.82E-16 | CCT6A     | 0.201573 | 2.21E-11 | GIN1      | -0.25192 | 4.00E-17 |
| NIP7    | 0.241514 | 7.97E-16 | PSAPL1    | 0.201332 | 2.33E-11 | JADE2     | -0.25195 | 3.95E-17 |
| TMC7    | 0.241456 | 8.10E-16 | PRR11     | 0.201249 | 2.38E-11 | GLIPR1L2  | -0.25258 | 3.29E-17 |
| ENTPD2  | 0.241389 | 8.26E-16 | HIST1H2BJ | 0.201203 | 2.40E-11 | SETBP1    | -0.25341 | 2.57E-17 |
| DPM1    | 0.240947 | 9.35E-16 | SNRPA1    | 0.201202 | 2.40E-11 | MAGI2     | -0.25402 | 2.15E-17 |
| CASP3   | 0.240839 | 9.63E-16 | SLC6A19   | 0.201162 | 2.43E-11 | OSGEPL1   | -0.2542  | 2.04E-17 |
| RNF114  | 0.2408   | 9.74E-16 | TXN       | 0.201147 | 2.44E-11 | KIZ       | -0.2542  | 2.03E-17 |
| PCBP3   | 0.240715 | 9.97E-16 | OPRK1     | 0.201089 | 2.47E-11 | EGOT      | -0.2545  | 1.86E-17 |
| USH1G   | 0.240232 | 1.14E-15 | MOCS3     | 0.201073 | 2.48E-11 | GLI3      | -0.25479 | 1.71E-17 |

|          |          |          |           |          |          |           |          |          |
|----------|----------|----------|-----------|----------|----------|-----------|----------|----------|
| DLGAP4   | 0.240132 | 1.17E-15 | LINC01634 | 0.201067 | 2.48E-11 | FRY       | -0.25481 | 1.70E-17 |
| MROH6    | 0.240106 | 1.18E-15 | PKM       | 0.201015 | 2.51E-11 | MCC       | -0.25483 | 1.69E-17 |
| SPTBN2   | 0.239879 | 1.26E-15 | TMCC2     | 0.200982 | 2.53E-11 | SEZ6L     | -0.25533 | 1.45E-17 |
| EFNA3    | 0.239865 | 1.26E-15 | DKC1      | 0.200975 | 2.53E-11 | SPATA4    | -0.25592 | 1.22E-17 |
| WDR62    | 0.23984  | 1.27E-15 | UMODL1    | 0.200967 | 2.54E-11 | SLC25A45  | -0.25659 | 9.97E-18 |
| KIF20A   | 0.2398   | 1.29E-15 | SKA1      | 0.200963 | 2.54E-11 | CTC1      | -0.25697 | 8.89E-18 |
| PPP1R14C | 0.239707 | 1.32E-15 | STMN1     | 0.200923 | 2.56E-11 | CNTD1     | -0.25709 | 8.56E-18 |
| CHAF1B   | 0.239671 | 1.34E-15 | IGF2BP2   | 0.200713 | 2.69E-11 | SERPINA11 | -0.25713 | 8.47E-18 |
| ACP7     | 0.239419 | 1.43E-15 | HSP90AA1  | 0.200653 | 2.73E-11 | TCTN2     | -0.25715 | 8.42E-18 |
| CD24     | 0.23897  | 1.62E-15 | RACGAP1   | 0.200545 | 2.80E-11 | NDFIP1    | -0.25728 | 8.09E-18 |
| KRT9     | 0.238815 | 1.69E-15 | TPM4      | 0.200501 | 2.83E-11 | CCNH      | -0.25781 | 6.89E-18 |
| GIPC1    | 0.238706 | 1.75E-15 | PIEZO1    | 0.200474 | 2.84E-11 | TNS2      | -0.25801 | 6.49E-18 |
| MTHFD1L  | 0.238702 | 1.75E-15 | OLIG1     | 0.200267 | 2.98E-11 | NUDT6     | -0.25842 | 5.74E-18 |
| VSIG10L  | 0.238573 | 1.81E-15 | PGLYRP3   | 0.200193 | 3.03E-11 | TMEM144   | -0.25844 | 5.70E-18 |
| SMYD2    | 0.238527 | 1.83E-15 | HNRNPAB   | 0.200184 | 3.04E-11 | FAM110B   | -0.25887 | 5.00E-18 |
| HAUS8    | 0.238512 | 1.84E-15 | NMU       | 0.200091 | 3.11E-11 | BTRC      | -0.25922 | 4.51E-18 |
| MYCN     | 0.238482 | 1.86E-15 | TEAD3     | 0.200088 | 3.11E-11 | VWA2      | -0.25963 | 3.97E-18 |
| KIFC1    | 0.23824  | 1.99E-15 | LINC00938 | -0.20003 | 3.15E-11 | KIF13B    | -0.25979 | 3.78E-18 |
| CMC2     | 0.238106 | 2.06E-15 | PHGR1     | -0.2001  | 3.10E-11 | TTC41P    | -0.25981 | 3.76E-18 |
| PGRMC1   | 0.238057 | 2.09E-15 | IVD       | -0.20035 | 2.93E-11 | C5ORF63   | -0.25983 | 3.73E-18 |
| PLP2     | 0.237802 | 2.24E-15 | C12ORF76  | -0.20044 | 2.87E-11 | ERBB4     | -0.25991 | 3.64E-18 |
| PNP      | 0.237723 | 2.29E-15 | MZF1      | -0.20052 | 2.81E-11 | TRAK1     | -0.26005 | 3.49E-18 |
| NAE1     | 0.237663 | 2.33E-15 | ZNF227    | -0.20057 | 2.78E-11 | CASC1     | -0.26015 | 3.39E-18 |
| CAMK1D   | 0.237544 | 2.41E-15 | MTMR10    | -0.20057 | 2.78E-11 | ARSG      | -0.26028 | 3.26E-18 |
| GALNT3   | 0.237269 | 2.60E-15 | FBX036    | -0.20073 | 2.68E-11 | NUMA1     | -0.26174 | 2.08E-18 |

|          |          |          |          |          |          |          |          |          |
|----------|----------|----------|----------|----------|----------|----------|----------|----------|
| FGFR4    | 0.23702  | 2.78E-15 | EDEM1    | -0.20076 | 2.67E-11 | EFHC1    | -0.2618  | 2.04E-18 |
| RYR1     | 0.236589 | 3.13E-15 | TRIM45   | -0.2008  | 2.64E-11 | MLLT3    | -0.26241 | 1.70E-18 |
| LY6E     | 0.236514 | 3.20E-15 | HSD17B8  | -0.20083 | 2.62E-11 | ZSCAN26  | -0.26268 | 1.56E-18 |
| IL36RN   | 0.236507 | 3.20E-15 | C20ORF96 | -0.20087 | 2.60E-11 | THTPA    | -0.26277 | 1.52E-18 |
| CAMP     | 0.236459 | 3.25E-15 | C5AR2    | -0.20093 | 2.56E-11 | RABEP1   | -0.2628  | 1.50E-18 |
| SCEL     | 0.236407 | 3.29E-15 | PRKAB1   | -0.20116 | 2.43E-11 | EWSAT1   | -0.26287 | 1.47E-18 |
| KLF5     | 0.236156 | 3.53E-15 | C9ORF64  | -0.20122 | 2.40E-11 | CCDC183  | -0.26302 | 1.41E-18 |
| PDSS1    | 0.236122 | 3.56E-15 | ENPP4    | -0.2013  | 2.35E-11 | ZNF546   | -0.26302 | 1.40E-18 |
| ZNF695   | 0.236024 | 3.66E-15 | CEP120   | -0.20134 | 2.33E-11 | SNHG8    | -0.26315 | 1.35E-18 |
| SMOX     | 0.235999 | 3.68E-15 | PACRGL   | -0.20142 | 2.28E-11 | SEPSECS  | -0.26322 | 1.32E-18 |
| RAET1K   | 0.235803 | 3.89E-15 | CFAP43   | -0.20158 | 2.21E-11 | TBC1D9   | -0.26368 | 1.14E-18 |
| RHBDL2   | 0.235676 | 4.02E-15 | FGD3     | -0.20175 | 2.12E-11 | STK32B   | -0.26377 | 1.11E-18 |
| SLC9A4   | 0.235555 | 4.16E-15 | PPM1M    | -0.20181 | 2.09E-11 | NPHP1    | -0.26473 | 8.26E-19 |
| TMSB15B  | 0.235483 | 4.24E-15 | IDUA     | -0.20188 | 2.05E-11 | MYO18B   | -0.26518 | 7.19E-19 |
| RCC2     | 0.235432 | 4.30E-15 | KIAA1328 | -0.20198 | 2.01E-11 | GRK3     | -0.26532 | 6.89E-19 |
| CHD7     | 0.235344 | 4.41E-15 | KIF12    | -0.20202 | 1.99E-11 | POLK     | -0.26559 | 6.33E-19 |
| AMMECR1  | 0.235169 | 4.62E-15 | KLHL32   | -0.20206 | 1.97E-11 | LYRM9    | -0.26564 | 6.22E-19 |
| HOMER3   | 0.235153 | 4.64E-15 | ZNF721   | -0.20209 | 1.96E-11 | MAATS1   | -0.26583 | 5.87E-19 |
| COLGALT1 | 0.235053 | 4.77E-15 | ZBTB14   | -0.2021  | 1.95E-11 | SUGT1P3  | -0.26598 | 5.59E-19 |
| GPT2     | 0.234872 | 5.01E-15 | KIAA1324 | -0.20234 | 1.85E-11 | BBS1     | -0.26678 | 4.35E-19 |
| TGM1     | 0.234772 | 5.15E-15 | SPATA24  | -0.2025  | 1.78E-11 | CIRBP    | -0.26738 | 3.61E-19 |
| EXO1     | 0.234724 | 5.22E-15 | ARFIP2   | -0.20257 | 1.75E-11 | CALCOCO1 | -0.26753 | 3.44E-19 |
| GSDMC    | 0.234531 | 5.50E-15 | RAPGEF4  | -0.20258 | 1.75E-11 | ZSCAN30  | -0.26797 | 3.00E-19 |
| CYP27C1  | 0.234449 | 5.62E-15 | SRSF5    | -0.20267 | 1.71E-11 | ELP2     | -0.26822 | 2.77E-19 |
| BIRC5    | 0.234335 | 5.80E-15 | LRP2     | -0.20269 | 1.70E-11 | NOSTRIN  | -0.26882 | 2.29E-19 |

|          |          |          |           |          |          |           |          |          |
|----------|----------|----------|-----------|----------|----------|-----------|----------|----------|
| PLA2G15  | 0.23433  | 5.81E-15 | CLASP2    | -0.2027  | 1.70E-11 | NEK10     | -0.26888 | 2.24E-19 |
| EN1      | 0.234271 | 5.90E-15 | FAM174A   | -0.20278 | 1.67E-11 | SALL2     | -0.27044 | 1.37E-19 |
| SMURF1   | 0.233924 | 6.48E-15 | CST5      | -0.20283 | 1.65E-11 | DUBR      | -0.27161 | 9.43E-20 |
| KCNF1    | 0.233488 | 7.30E-15 | LINC00663 | -0.20287 | 1.63E-11 | BORCS7    | -0.27172 | 9.11E-20 |
| DPYSL5   | 0.233377 | 7.52E-15 | PEX12     | -0.20291 | 1.62E-11 | BTF3      | -0.27272 | 6.60E-20 |
| MVD      | 0.233322 | 7.63E-15 | NSA2      | -0.20311 | 1.55E-11 | PCSK6     | -0.27273 | 6.58E-20 |
| ORC1     | 0.23323  | 7.83E-15 | HDAC7     | -0.20312 | 1.54E-11 | BTG2      | -0.27303 | 5.98E-20 |
| VASN     | 0.233154 | 7.99E-15 | TTC8      | -0.20314 | 1.53E-11 | CCDC28A   | -0.27336 | 5.37E-20 |
| ABHD11   | 0.233103 | 8.10E-15 | TBC1D15   | -0.20316 | 1.52E-11 | SERPINI1  | -0.27372 | 4.78E-20 |
| RGS20    | 0.233078 | 8.16E-15 | SLC27A1   | -0.20317 | 1.52E-11 | WDR19     | -0.27391 | 4.49E-20 |
| PSAT1    | 0.23284  | 8.70E-15 | ABHD1     | -0.20331 | 1.47E-11 | TPRG1     | -0.2744  | 3.83E-20 |
| UBE2A    | 0.232802 | 8.79E-15 | CFB       | -0.20333 | 1.47E-11 | NUDT12    | -0.27445 | 3.77E-20 |
| AURKB    | 0.232792 | 8.81E-15 | DCTN4     | -0.20336 | 1.45E-11 | ZNF740    | -0.27464 | 3.55E-20 |
| CTSV     | 0.232678 | 9.09E-15 | PPP1R3E   | -0.20337 | 1.45E-11 | DNAH5     | -0.2747  | 3.47E-20 |
| SMIM5    | 0.232627 | 9.21E-15 | ZCCHC4    | -0.20342 | 1.44E-11 | MOAP1     | -0.27489 | 3.27E-20 |
| F11R     | 0.232553 | 9.40E-15 | BRD8      | -0.20346 | 1.42E-11 | GATA3-AS1 | -0.2757  | 2.51E-20 |
| APBA2    | 0.2325   | 9.53E-15 | FAM161B   | -0.20351 | 1.41E-11 | VAMP2     | -0.2759  | 2.35E-20 |
| C1ORF105 | 0.232316 | 1.00E-14 | CA14      | -0.20352 | 1.40E-11 | FM05      | -0.27597 | 2.30E-20 |
| CLCN5    | 0.232091 | 1.06E-14 | HTR7P1    | -0.20358 | 1.38E-11 | CYP2B7P   | -0.27623 | 2.12E-20 |
| TROAP    | 0.232079 | 1.07E-14 | TMED7     | -0.20358 | 1.38E-11 | FAM47E    | -0.2763  | 2.06E-20 |
| ARHGEF4  | 0.231945 | 1.11E-14 | CCDC191   | -0.2036  | 1.38E-11 | CAMLG     | -0.27641 | 2.00E-20 |
| YTHDF1   | 0.23192  | 1.11E-14 | ATPAF1    | -0.20373 | 1.34E-11 | QDPR      | -0.27656 | 1.90E-20 |
| TCP1     | 0.231704 | 1.18E-14 | CACNA1D   | -0.20385 | 1.30E-11 | TAPT1-AS1 | -0.27736 | 1.46E-20 |
| C16ORF87 | 0.23157  | 1.22E-14 | PCED1A    | -0.20388 | 1.29E-11 | IKZF5     | -0.27836 | 1.05E-20 |
| TCF3     | 0.231363 | 1.29E-14 | MED13L    | -0.2039  | 1.28E-11 | RERG      | -0.27842 | 1.03E-20 |

|         |          |          |         |          |          |          |          |          |
|---------|----------|----------|---------|----------|----------|----------|----------|----------|
| SLC10A3 | 0.231322 | 1.31E-14 | CHRD    | -0.20397 | 1.26E-11 | C4A      | -0.27873 | 9.30E-21 |
| STIP1   | 0.231205 | 1.35E-14 | PHYKPL  | -0.20409 | 1.23E-11 | SLC46A1  | -0.27959 | 6.99E-21 |
| CDH1    | 0.231193 | 1.35E-14 | TRMT10A | -0.2041  | 1.23E-11 | TTC39C   | -0.28034 | 5.46E-21 |
| SLCO4A1 | 0.231071 | 1.40E-14 | PTGR2   | -0.20414 | 1.21E-11 | CHD3     | -0.28176 | 3.40E-21 |
| HPCAL1  | 0.230682 | 1.55E-14 | CFAP36  | -0.20426 | 1.18E-11 | EVL      | -0.28242 | 2.73E-21 |
| DSC2    | 0.230071 | 1.83E-14 | SIRT3   | -0.20427 | 1.18E-11 | TTC23L   | -0.28269 | 2.49E-21 |
| MSI1    | 0.229687 | 2.03E-14 | NEAT1   | -0.20431 | 1.17E-11 | FAM114A2 | -0.28307 | 2.20E-21 |
| DHCR7   | 0.229614 | 2.06E-14 | SLC30A9 | -0.20442 | 1.14E-11 | HSD17B4  | -0.28355 | 1.87E-21 |
| CLDN3   | 0.229499 | 2.13E-14 | EFCAB6  | -0.20461 | 1.09E-11 | PIGH     | -0.28392 | 1.65E-21 |
| E2F8    | 0.229461 | 2.15E-14 | LTBP3   | -0.20473 | 1.05E-11 | GSAP     | -0.28394 | 1.64E-21 |
| GARS    | 0.229289 | 2.25E-14 | DRAIC   | -0.20489 | 1.02E-11 | SPEF2    | -0.28422 | 1.49E-21 |
| UCA1    | 0.22928  | 2.26E-14 | FBXW4   | -0.20503 | 9.83E-12 | B4GAT1   | -0.28506 | 1.12E-21 |
| KHSRP   | 0.229242 | 2.28E-14 | FAAH2   | -0.20505 | 9.80E-12 | CREBL2   | -0.28509 | 1.11E-21 |
| CENPI   | 0.22913  | 2.35E-14 | RSBN1L  | -0.20506 | 9.76E-12 | PGPEP1   | -0.28532 | 1.03E-21 |
| HENMT1  | 0.22899  | 2.44E-14 | SERF1A  | -0.20551 | 8.79E-12 | SYBU     | -0.28547 | 9.76E-22 |
| MNX1    | 0.228975 | 2.45E-14 | ICA1    | -0.2056  | 8.60E-12 | MRPS27   | -0.28554 | 9.54E-22 |
| CEP55   | 0.2289   | 2.50E-14 | PGGHG   | -0.20561 | 8.59E-12 | INPP5J   | -0.28622 | 7.57E-22 |
| PLAU    | 0.228806 | 2.56E-14 | ABCC8   | -0.20566 | 8.48E-12 | JADE1    | -0.28841 | 3.58E-22 |
| CDCA5   | 0.228743 | 2.60E-14 | TYW3    | -0.20568 | 8.43E-12 | CFAP69   | -0.28844 | 3.55E-22 |
| PALM2   | 0.228575 | 2.72E-14 | SMAP2   | -0.20578 | 8.23E-12 | TRAM1L1  | -0.28856 | 3.40E-22 |
| BEND3   | 0.228557 | 2.73E-14 | CEP126  | -0.20607 | 7.69E-12 | DCDC1    | -0.28892 | 3.01E-22 |
| PGK1    | 0.228195 | 3.01E-14 | TMEM26  | -0.20617 | 7.52E-12 | XPA      | -0.2894  | 2.55E-22 |
| IL4R    | 0.228037 | 3.14E-14 | SYNGAP1 | -0.20624 | 7.39E-12 | LRIG1    | -0.2901  | 2.00E-22 |
| COG4    | 0.227965 | 3.20E-14 | EIF2A   | -0.20643 | 7.06E-12 | ACADSB   | -0.29154 | 1.22E-22 |
| CHRNA5  | 0.227908 | 3.24E-14 | ZNF568  | -0.20649 | 6.97E-12 | ZNF396   | -0.29217 | 9.76E-23 |

|          |          |          |             |          |          |           |          |          |
|----------|----------|----------|-------------|----------|----------|-----------|----------|----------|
| MCM6     | 0.227839 | 3.30E-14 | CSNK1G3     | -0.20652 | 6.91E-12 | STEAP2    | -0.29668 | 2.00E-23 |
| MKI67    | 0.227692 | 3.44E-14 | CARF        | -0.20656 | 6.84E-12 | TSHZ1     | -0.29803 | 1.24E-23 |
| CENPO    | 0.227622 | 3.50E-14 | DNAJC18     | -0.20667 | 6.67E-12 | PHOSPHO2  | -0.30017 | 5.75E-24 |
| TAGLN2   | 0.227587 | 3.53E-14 | ATP9B       | -0.2067  | 6.63E-12 | ITPR1     | -0.30123 | 3.92E-24 |
| KRT4     | 0.227313 | 3.80E-14 | PAXIP1-AS2  | -0.20672 | 6.59E-12 | LINC00173 | -0.30152 | 3.53E-24 |
| SLC6A11  | 0.227296 | 3.81E-14 | RCOR3       | -0.20675 | 6.55E-12 | LETMD1    | -0.30196 | 3.01E-24 |
| FAM178B  | 0.227154 | 3.96E-14 | ABCD3       | -0.20691 | 6.30E-12 | NOVA1     | -0.30273 | 2.28E-24 |
| CDC45    | 0.227137 | 3.98E-14 | SMAD4       | -0.20709 | 6.04E-12 | APH1B     | -0.30291 | 2.13E-24 |
| GRAMD2A  | 0.22713  | 3.98E-14 | C5ORF15     | -0.20714 | 5.96E-12 | EIF4B     | -0.30599 | 6.93E-25 |
| RTL8A    | 0.22711  | 4.00E-14 | ANKRD30B    | -0.20732 | 5.72E-12 | KLHDC1    | -0.30672 | 5.30E-25 |
| MRGBP    | 0.227064 | 4.05E-14 | BCDIN3D-AS1 | -0.20735 | 5.67E-12 | CYB5D2    | -0.31064 | 1.23E-25 |
| MTFR1    | 0.226995 | 4.13E-14 | FGF10       | -0.2074  | 5.60E-12 | DELE1     | -0.31065 | 1.23E-25 |
| DYNC1LI2 | 0.22696  | 4.16E-14 | SLC4A7      | -0.20741 | 5.59E-12 | NHLRC4    | -0.3116  | 8.60E-26 |
| C10ORF91 | 0.226955 | 4.17E-14 | PHF1        | -0.20743 | 5.57E-12 | RAMP2-AS1 | -0.31462 | 2.75E-26 |
| LGALS3   | 0.226831 | 4.31E-14 | RERE        | -0.20743 | 5.57E-12 | BCL2      | -0.31578 | 1.77E-26 |
| PRKAG3   | 0.226731 | 4.42E-14 | CEP63       | -0.20749 | 5.49E-12 | RGS22     | -0.32021 | 3.21E-27 |
| B4GALT5  | 0.22647  | 4.74E-14 | ZNF345      | -0.20755 | 5.41E-12 | HDHD2     | -0.33106 | 4.34E-29 |
| CPAMD8   | 0.226457 | 4.75E-14 | SPATA6      | -0.20758 | 5.37E-12 | TAPT1     | -0.33165 | 3.42E-29 |
| ACAT2    | 0.226445 | 4.77E-14 | SLC14A1     | -0.20769 | 5.23E-12 | ZADH2     | -0.333   | 1.97E-29 |
| TNNT2    | 0.226415 | 4.80E-14 | PRRT3       | -0.20799 | 4.86E-12 | ZFAND4    | -0.33488 | 9.16E-30 |
| KCMF1    | 0.226377 | 4.85E-14 | LPAR6       | -0.20801 | 4.85E-12 | PLCD4     | -0.3481  | 3.54E-32 |
| SPART    | -0.20809 | 4.75E-12 | PIEZO2      | -0.20813 | 4.71E-12 | LINC00472 | -0.36496 | 1.98E-35 |

b. GO

| Category         | Term                                | Count | %        | PValue   | Genes                                                                                                                                           | List Total | Pop Hits | Pop Total | Fold Enrichment | Bonferroni | Benjamini | FDR      |
|------------------|-------------------------------------|-------|----------|----------|-------------------------------------------------------------------------------------------------------------------------------------------------|------------|----------|-----------|-----------------|------------|-----------|----------|
| GOTERM_BP_DIRECT | GO:0007067~mitotic nuclear division | 44    | 3.600655 | 3.75E-10 | BORA, PKMYT1, ANLN, AURKA, CEP55, AURKB, CCNG1, RCC1, CCNG2, FAM83D, KIF2C, NUMA1, MIS18A, CDCA2, BUB1, SKA3, SKA1, CDCA5, CCNA2, TUBB3, CDCA3, | 1020       | 248      | 16792     | 2.92081         | 1.28E-06   | 1.28E-06  | 6.85E-07 |

|                      |                      |    |                  |              |                                                                                                                                                                                                                              |      |     |       |              |          |          |              |
|----------------------|----------------------|----|------------------|--------------|------------------------------------------------------------------------------------------------------------------------------------------------------------------------------------------------------------------------------|------|-----|-------|--------------|----------|----------|--------------|
|                      |                      |    |                  |              | ERCC6L,<br>CDK1,<br>CENPN,<br>CCNF,<br>NUF2,<br>TPX2,<br>NDC80,<br>CDC20,<br>UBE2I,<br>BIRC5,<br>CEP63,<br>REEP4,<br>CDC25A,<br>CDC25B,<br>CCNB2,<br>RCC2,<br>SGO1,<br>PLK1,<br>CENPW,<br>NEK9,<br>HAUS8,<br>CHFR,<br>CLTCL1 |      |     |       |              |          |          |              |
| GOTERM_B<br>P_DIRECT | GO:0<br>0513<br>01~c | 52 | 4.2<br>553<br>19 | 4.95E<br>-09 | KIFC1,<br>BORA,<br>AURKA,                                                                                                                                                                                                    | 1020 | 350 | 16792 | 2.445<br>894 | 1.69E-05 | 8.46E-06 | 9.04<br>E-06 |

ell  
divi  
sion

FAM83D,  
CCNE2,  
KIF2C,  
CCNE1,  
CDCA8,  
MIS18A,  
CDCA2,  
CABLES2,  
CDCA5,  
CCNA2,  
TUBA1B,  
CDCA4,  
TUBA1C,  
CDCA3,  
CDK1,  
CCNF,  
TPX2,  
UBE2I,  
UBE2C,  
CHMP1A,  
RCC2,  
SGO1,  
NEK9,  
HAUS8,  
CHFR,  
UBE2S,

|                      |                      |    |                  |              |                                                                                                                                                                                                                                 |      |     |       |              |          |          |              |
|----------------------|----------------------|----|------------------|--------------|---------------------------------------------------------------------------------------------------------------------------------------------------------------------------------------------------------------------------------|------|-----|-------|--------------|----------|----------|--------------|
|                      |                      |    |                  |              | RCC1,<br>CCNG1,<br>CCNG2,<br>TUBB,<br>NUMA1,<br>NCAPH,<br>USP39,<br>BUB1,<br>SKA3,<br>CLASP2,<br>SKA1,<br>ERCC6L,<br>NUF2,<br>NDC80,<br>BIRC5,<br>CDC20,<br>CEP63,<br>REEP4,<br>CDC25A,<br>CDC25B,<br>CCNB1,<br>CCNB2,<br>CENPW |      |     |       |              |          |          |              |
| GOTERM_B<br>P_DIRECT | GO:0<br>0517<br>26~r | 25 | 2.0<br>458<br>27 | 3.61E<br>-07 | E2F2,<br>CDK17,<br>ADARB1,                                                                                                                                                                                                      | 1020 | 124 | 16792 | 3.319<br>102 | 0.001233 | 4.11E-04 | 6.60<br>E-04 |

|                      |                          |    |                  |          |                                                                                                                                                                                                                        |      |     |       |              |          |          |          |
|----------------------|--------------------------|----|------------------|----------|------------------------------------------------------------------------------------------------------------------------------------------------------------------------------------------------------------------------|------|-----|-------|--------------|----------|----------|----------|
|                      | egulation of cell cycle  |    |                  |          | CCNI,<br>BTRC,<br>FOXM1,<br>CCNF,<br>PRR11,<br>PKMYT1,<br>CCNG1,<br>CDKL3,<br>MYBL2,<br>CCNG2,<br>CDC25A,<br>SRC,<br>CCNB1,<br>CCNE2,<br>CCNE1,<br>BAK1,<br>SRSF5,<br>CCNB2,<br>PLK1,<br>CABLES2,<br>CDK16,<br>CCNDBP1 |      |     |       |              |          |          |          |
| GOTERM_B<br>P_DIRECT | GO:0007062<br>~s<br>iste | 21 | 1.7<br>184<br>94 | 3.18E-06 | CENPO,<br>CENPN,<br>CENPP,<br>KIF18A,                                                                                                                                                                                  | 1020 | 103 | 16792 | 3.356<br>482 | 0.010809 | 0.002713 | 0.005808 |

|                      |                                                           |    |                  |              |                                                                                                                                                                   |      |    |       |             |          |          |              |
|----------------------|-----------------------------------------------------------|----|------------------|--------------|-------------------------------------------------------------------------------------------------------------------------------------------------------------------|------|----|-------|-------------|----------|----------|--------------|
|                      | r<br>chro<br>mati<br>d<br>cohe<br>sion                    |    |                  |              | NUF2,<br>NDC80,<br>BIRC5,<br>CDC20,<br>AURKB,<br>CENPI,<br>KIF2C,<br>CDCA8,<br>RCC2,<br>SGO1,<br>PLK1,<br>CENPA,<br>BUB1,<br>SKA1,<br>CLASP2,<br>CDCA5,<br>ERCC6L |      |    |       |             |          |          |              |
| GOTERM_B<br>P_DIRECT | GO:0<br>0002<br>81~m<br>itot<br>ic<br>cyto<br>kine<br>sis | 11 | 0.9<br>001<br>64 | 4.49E<br>-06 | KIF23,<br>BBS4,<br>KIF4B,<br>KIF4A,<br>CENPA,<br>PLK1,<br>ANLN,<br>STMN1,<br>CEP55,                                                                               | 1020 | 29 | 16792 | 6.244<br>49 | 0.015237 | 0.003066 | 0.00<br>8206 |

|                      |                                                                                             |    |                  |              |                                                                                                                                                                                    |      |     |       |              |          |          |              |
|----------------------|---------------------------------------------------------------------------------------------|----|------------------|--------------|------------------------------------------------------------------------------------------------------------------------------------------------------------------------------------|------|-----|-------|--------------|----------|----------|--------------|
|                      |                                                                                             |    |                  |              | RACGAP1,<br>KIF20A                                                                                                                                                                 |      |     |       |              |          |          |              |
| GOTERM_B<br>P_DIRECT | GO:0<br>0000<br>82~G<br>1/S<br>tran<br>siti<br>on<br>of<br>mito<br>tic<br>cell<br>cycl<br>e | 19 | 1.5<br>548<br>28 | 3.80E<br>-05 | CDK1,<br>CCNH,<br>DBF4,<br>IQGAP3,<br>PKMYT1,<br>RCC1,<br>MCM10,<br>MCM4,<br>CDC25A,<br>MCM6,<br>CDT1,<br>CCNE2,<br>CCNE1,<br>CDC45,<br>RRM2,<br>PRIM2,<br>ORC6,<br>CDCA5,<br>ORC1 | 1020 | 102 | 16792 | 3.066<br>59  | 0.121745 | 0.021404 | 0.06<br>9361 |
| GOTERM_B<br>P_DIRECT | GO:0<br>0070<br>52~m<br>itot<br>ic                                                          | 10 | 0.8<br>183<br>31 | 4.83E<br>-05 | CCNB1,<br>STIL,<br>CEP126,<br>WDR62,<br>TTK,                                                                                                                                       | 1020 | 30  | 16792 | 5.487<br>582 | 0.152141 | 0.023302 | 0.08<br>8171 |

|                  |                                                      |    |          |          |                                                         |      |    |       |          |          |          |          |
|------------------|------------------------------------------------------|----|----------|----------|---------------------------------------------------------|------|----|-------|----------|----------|----------|----------|
|                  | spindle organization                                 |    |          |          | NDC80, AURKA, STMN1, CLASP2, RCC1                       |      |    |       |          |          |          |          |
| GOTERM_BP_DIRECT | GO:0042267~natural killer cell mediated cytotoxicity | 8  | 0.654664 | 5.22E-05 | TUBB, RAET1G, ULBP3, CEBPG, ULBP1, ULBP2, RAET1L, PRDX1 | 1020 | 18 | 16792 | 7.316776 | 0.163545 | 0.022075 | 0.095402 |
| GOTERM_BP_DIRECT | GO:0006270~DNA replication initiation                | 10 | 0.818331 | 8.48E-05 | CCNE2, CCNE1, CDC45, GINS4, PRIM2, ORC6, MCM10, MCM4,   | 1020 | 32 | 16792 | 5.144608 | 0.251645 | 0.031695 | 0.154812 |

|                      |                                                             |    |                  |              |                                                                                                                                                             |      |    |       |              |          |          |              |
|----------------------|-------------------------------------------------------------|----|------------------|--------------|-------------------------------------------------------------------------------------------------------------------------------------------------------------|------|----|-------|--------------|----------|----------|--------------|
|                      | iation<br>on                                                |    |                  |              | ORC1, MCM6                                                                                                                                                  |      |    |       |              |          |          |              |
| GOTERM_B<br>P_DIRECT | G0:0<br>0085<br>44~e<br>pide<br>rmis<br>deve<br>lop<br>ment | 16 | 1.3<br>093<br>29 | 1.65E<br>-04 | KLK7,<br>S100A7,<br>KLK5,<br>GJB5,<br>GRHL3,<br>GRHL1,<br>SCEL,<br>KRT9,<br>PLOD1,<br>CASP14,<br>KRT16,<br>SPRR2D,<br>SPRR1B,<br>OVOL1,<br>CALML5,<br>KRT83 | 1020 | 85 | 16792 | 3.098<br>87  | 0.430667 | 0.054772 | 0.30<br>061  |
| GOTERM_B<br>P_DIRECT | G0:0<br>0070<br>59~c<br>hrom<br>osom<br>e<br>segr<br>egat   | 14 | 1.1<br>456<br>63 | 1.94E<br>-04 | CENPN,<br>NUF2,<br>NEK10,<br>NDC80,<br>UBE2I,<br>RCC1,<br>SGO1,<br>HJURP,                                                                                   | 1020 | 68 | 16792 | 3.389<br>389 | 0.484772 | 0.058505 | 0.35<br>3806 |

|                      |                                                                |    |                  |              |                                                                                                                                                                                                          |      |     |       |              |          |          |              |
|----------------------|----------------------------------------------------------------|----|------------------|--------------|----------------------------------------------------------------------------------------------------------------------------------------------------------------------------------------------------------|------|-----|-------|--------------|----------|----------|--------------|
|                      | ion                                                            |    |                  |              | MIS18A,<br>CDCA2,<br>SKA3,<br>CENPW,<br>NEK9, SKA1                                                                                                                                                       |      |     |       |              |          |          |              |
| GOTERM_B<br>P_DIRECT | GO:0<br>0602<br>71~c<br>iliu<br>m<br>morp<br>hoge<br>nesi<br>s | 21 | 1.7<br>184<br>94 | 2.04E<br>-04 | BBS4,<br>BBS5,<br>RPGR,<br>CEP126,<br>UNC119B,<br>TTC8,<br>PCM1,<br>ARL6,<br>DNAH5,<br>BBS1,<br>ACTR3,<br>NOTCH1,<br>WDR19,<br>RAB17,<br>CFAP20,<br>DYNC2H1,<br>TCTN1,<br>TCTN2,<br>WDR35,<br>EHD1, INTU | 1020 | 136 | 16792 | 2.542<br>042 | 0.501765 | 0.056404 | 0.37<br>1666 |
| GOTERM_B             | GO:0                                                           | 15 | 1.2              | 3.37E        | KIF23,                                                                                                                                                                                                   | 1020 | 81  | 16792 | 3.048        | 0.684037 | 0.084812 | 0.61         |

|                      |                                                              |    |                  |              |                                                                                                                                                   |      |     |       |              |          |          |              |
|----------------------|--------------------------------------------------------------|----|------------------|--------------|---------------------------------------------------------------------------------------------------------------------------------------------------|------|-----|-------|--------------|----------|----------|--------------|
| P_DIRECT             | 0070<br>18~m<br>icro<br>tubu<br>le-b<br>ased<br>move<br>ment |    | 274<br>96        | -04          | KIF4B,<br>KIFC1,<br>KIF12,<br>KIF4A,<br>DYNC1LI2,<br>KIF18A,<br>RACGAP1,<br>DNAH5,<br>KIFC3,<br>KIF2C,<br>KIF1A,<br>DYNC2H1,<br>KIF20A,<br>KIF13B |      |     |       | 656          |          |          | 3891         |
| GOTERM_B<br>P_DIRECT | GO:0<br>0062<br>60~D<br>NA<br>repl<br>icat<br>ion            | 22 | 1.8<br>003<br>27 | 4.50E<br>-04 | EXO1,<br>POLL,<br>CLSPN,<br>CDK1,<br>POLK,<br>POLI,<br>TICRR,<br>DBF4,<br>GINS3,<br>GINS4,<br>MCM10,<br>MCM4,                                     | 1020 | 155 | 16792 | 2.336<br>648 | 0.785152 | 0.104027 | 0.81<br>8557 |

|                      |                                                   |    |                  |              |                                                                                                                                                             |      |     |       |              |          |          |              |
|----------------------|---------------------------------------------------|----|------------------|--------------|-------------------------------------------------------------------------------------------------------------------------------------------------------------|------|-----|-------|--------------|----------|----------|--------------|
|                      |                                                   |    |                  |              | CDC25A,<br>CDT1,<br>MCM6,<br>CDC45,<br>RRM2,<br>ORC6,<br>ORC1,<br>CHAF1B,<br>RAD17,<br>DSCC1                                                                |      |     |       |              |          |          |              |
| GOTERM_B<br>P_DIRECT | GO:0<br>0423<br>84~c<br>iliu<br>m<br>asse<br>mbly | 19 | 1.5<br>548<br>28 | 4.88E<br>-04 | BBS4,<br>BBS5,<br>RPGR,<br>CEP126,<br>ABLIM3,<br>DYNC2LI1,<br>TTC8,<br>ARL6,<br>PCM1,<br>DNAH5,<br>BBS1,<br>NME5,<br>WDR19,<br>RAB17,<br>DYNC2H1,<br>TCTN2, | 1020 | 124 | 16792 | 2.522<br>517 | 0.811569 | 0.105301 | 0.88<br>8081 |

|                      |                                                                                             |    |                  |              |                                                                                                                                                                                                  |      |     |       |              |          |          |              |
|----------------------|---------------------------------------------------------------------------------------------|----|------------------|--------------|--------------------------------------------------------------------------------------------------------------------------------------------------------------------------------------------------|------|-----|-------|--------------|----------|----------|--------------|
|                      |                                                                                             |    |                  |              | WDR35,<br>EHD1, INTU                                                                                                                                                                             |      |     |       |              |          |          |              |
| GOTERM_B<br>P_DIRECT | G0:0<br>0000<br>86~G<br>2/M<br>tran<br>siti<br>on<br>of<br>mito<br>tic<br>cell<br>cycl<br>e | 20 | 1.6<br>366<br>61 | 6.16E<br>-04 | CDK1,<br>HSP90AA1,<br>CCNH,<br>BTRC,<br>FOXM1,<br>BORA,<br>TPX2,<br>PKMYT1,<br>AURKA,<br>BIRC5,<br>CEP63,<br>PCMI,<br>CDC25A,<br>CDC25B,<br>CCNB1,<br>TUBB,<br>CCNB2,<br>PLK1,<br>HAUS8,<br>MELK | 1020 | 137 | 16792 | 2.403<br>32  | 0.878443 | 0.123406 | 1.12<br>0015 |
| GOTERM_B<br>P_DIRECT | G0:0<br>0512<br>56~m<br>itot                                                                | 5  | 0.4<br>091<br>65 | 7.75E<br>-04 | KIF23,<br>KIF4B,<br>KIF4A,<br>AURKB,                                                                                                                                                             | 1020 | 8   | 16792 | 10.28<br>922 | 0.929274 | 0.144287 | 1.40<br>5813 |

|                      |                                                   |    |                  |              |                                                                                                                                                                                                     |      |     |       |              |         |          |              |
|----------------------|---------------------------------------------------|----|------------------|--------------|-----------------------------------------------------------------------------------------------------------------------------------------------------------------------------------------------------|------|-----|-------|--------------|---------|----------|--------------|
|                      | ic<br>spin<br>dle<br>midz<br>one<br>asse<br>mbly  |    |                  |              | RACGAP1                                                                                                                                                                                             |      |     |       |              |         |          |              |
| GOTERM_B<br>P_DIRECT | GO:0<br>0424<br>93~r<br>espo<br>nse<br>to<br>drug | 34 | 2.7<br>823<br>24 | 8.69E<br>-04 | ASS1,<br>CDH1,<br>CDH3, PNP,<br>CBX7,<br>KCNJ11,<br>SRC, BAK1,<br>CASP3,<br>BCL2,<br>GATA3,<br>TGFA,<br>ABCD3,<br>SRD5A1,<br>HTR1D,<br>FOSL1,<br>DNMT3B,<br>DNMT3A,<br>CDK1,<br>HSP90AA1,<br>BECN1, | 1020 | 304 | 16792 | 1.841<br>228 | 0.94877 | 0.152174 | 1.57<br>5607 |

|                      |                                                                                                        |   |                  |              |                                                                                                                     |      |    |       |              |          |          |              |
|----------------------|--------------------------------------------------------------------------------------------------------|---|------------------|--------------|---------------------------------------------------------------------------------------------------------------------|------|----|-------|--------------|----------|----------|--------------|
|                      |                                                                                                        |   |                  |              | SLC6A11,<br>GGH, CST3,<br>GAL,<br>RAD54L,<br>POR,<br>RAD51,<br>ABCG2,<br>LCN2,<br>CCNB1,<br>GNAS,<br>LRP8,<br>ABCC8 |      |    |       |              |          |          |              |
| GOTERM_B<br>P_DIRECT | GO:0<br>0163<br>38~c<br>alci<br>um-i<br>ndep<br>ende<br>nt<br>cell<br>-cel<br>l<br>adhe<br>sion<br>via | 7 | 0.5<br>728<br>31 | 0.001<br>213 | CLDN7,<br>CLDN9,<br>CLDN4,<br>CLDN3,<br>CLDN12,<br>CLDN23,<br>CLDN14                                                | 1020 | 21 | 16792 | 5.487<br>582 | 0.984197 | 0.196109 | 2.19<br>2357 |

|                  |                                                |   |          |          |                                                                 |      |    |       |          |          |          |          |
|------------------|------------------------------------------------|---|----------|----------|-----------------------------------------------------------------|------|----|-------|----------|----------|----------|----------|
|                  | plasma membrane cell-adhesion molecules        |   |          |          |                                                                 |      |    |       |          |          |          |          |
| GOTERM_BP_DIRECT | GO:0007080~mitotic metaphase plate congression | 9 | 0.736498 | 0.001426 | CCNB1, KIFC1, KIF2C, CHMP1A, CDCA8, BECN1, KIF18A, CEP55, CDCA5 | 1020 | 37 | 16792 | 4.004452 | 0.992381 | 0.2164   | 2.573013 |
| GOTERM_BP_DIRECT | GO:00070                                       | 6 | 0.4909   | 0.002027 | KIZ, TTK, AURKA,                                                | 1020 | 16 | 16792 | 6.173529 | 0.999027 | 0.281237 | 3.638554 |

|                      |                                                               |    |                  |              |                                                                                                                |      |    |       |              |          |          |              |
|----------------------|---------------------------------------------------------------|----|------------------|--------------|----------------------------------------------------------------------------------------------------------------|------|----|-------|--------------|----------|----------|--------------|
|                      | 51~s<br>pindle<br>organization                                |    | 98               |              | AURKB,<br>CHD3,<br>AUNIP                                                                                       |      |    |       |              |          |          |              |
| GOTERM_B<br>P_DIRECT | GO:0<br>0308<br>55~e<br>epithelial<br>cell<br>differentiation | 12 | 0.9<br>819<br>97 | 0.003<br>119 | CDK1,<br>F11R,<br>BARX1,<br>LGALS3,<br>RHCG,<br>KRT3,<br>KRT4,<br>TAGLN2,<br>PGK1,<br>ANXA4,<br>UPK2,<br>ACTL8 | 1020 | 70 | 16792 | 2.822<br>185 | 0.999977 | 0.384482 | 5.54<br>6489 |
| GOTERM_B<br>P_DIRECT | GO:0<br>0351<br>08~l<br>limb<br>morphogenesis                 | 5  | 0.4<br>091<br>65 | 0.003<br>153 | MEGF8,<br>BAK1,<br>ZNF141,<br>BMPR1B,<br>GLI3                                                                  | 1020 | 11 | 16792 | 7.483<br>066 | 0.999979 | 0.374517 | 5.60<br>4982 |

|                      |                                          |    |          |          |                                                             |      |     |       |          |          |          |          |
|----------------------|------------------------------------------|----|----------|----------|-------------------------------------------------------------|------|-----|-------|----------|----------|----------|----------|
| GOTERM_B<br>P_DIRECT | GO:0006306~DNA methylation               | 7  | 0.572831 | 0.003214 | DNMT3A, BEND3, HENMT1, EZH2, GNAS, DNMT3B, HEMK1            | 1020 | 25  | 16792 | 4.609569 | 0.999983 | 0.367742 | 5.711215 |
| GOTERM_B<br>P_DIRECT | GO:0061436~establishment of skin barrier | 6  | 0.490998 | 0.003592 | CLDN4, KRT16, GRHL3, GRHL1, TMEM79, ABCA12                  | 1020 | 18  | 16792 | 5.487582 | 0.999995 | 0.388611 | 6.362864 |
| GOTERM_B<br>P_DIRECT | GO:0006281~DNA repair                    | 26 | 2.12766  | 0.004522 | CLSPN, APEX2, TICRR, FOXM1, FAN1, FANCI, POLQ, FANCA, POLL, | 1020 | 235 | 16792 | 1.82141  | 1        | 0.448861 | 7.945525 |

|                      |                                                                 |   |                  |              |                                                                                                                                                                 |      |    |       |              |   |          |              |
|----------------------|-----------------------------------------------------------------|---|------------------|--------------|-----------------------------------------------------------------------------------------------------------------------------------------------------------------|------|----|-------|--------------|---|----------|--------------|
|                      |                                                                 |   |                  |              | EXO1,<br>CDK1,<br>POLK,<br>UBE2A,<br>POLI,<br>GEN1,<br>RAD54L,<br>RAD51,<br>XPA,<br>UHRF1,<br>RFWD3,<br>BTG2,<br>PARP3,<br>PSME4,<br>CHAF1B,<br>RAD17,<br>UBE2T |      |    |       |              |   |          |              |
| GOTERM_B<br>P_DIRECT | G0:0<br>0458<br>62~p<br>osit<br>ive<br>regu<br>lati<br>on<br>of | 6 | 0.4<br>909<br>98 | 0.004<br>635 | BAK1,<br>FGFR4,<br>PLK1,<br>BTRC,<br>CYFIP2,<br>PERP                                                                                                            | 1020 | 19 | 16792 | 5.198<br>762 | 1 | 0.444619 | 8.13<br>6588 |

|                      |                                                                          |    |                  |              |                                                                             |      |    |       |              |   |          |              |
|----------------------|--------------------------------------------------------------------------|----|------------------|--------------|-----------------------------------------------------------------------------|------|----|-------|--------------|---|----------|--------------|
|                      | prot<br>eoly<br>sis                                                      |    |                  |              |                                                                             |      |    |       |              |   |          |              |
| GOTERM_B<br>P_DIRECT | G0:0<br>0310<br>69~h<br>air<br>foll<br>icle<br>morp<br>hoge<br>nesi<br>s | 7  | 0.5<br>728<br>31 | 0.004<br>843 | NOTCH1,<br>BCL2,<br>FGF10,<br>SNAI1,<br>INTU,<br>TMEM79,<br>CTSV            | 1020 | 27 | 16792 | 4.268<br>119 | 1 | 0.447118 | 8.48<br>6665 |
| GOTERM_B<br>P_DIRECT | G0:0<br>0070<br>17~m<br>icro<br>tubu<br>le-b<br>ased<br>proc<br>ess      | 8  | 0.6<br>546<br>64 | 0.005<br>26  | TUBB,<br>NEK10,<br>NEK9,<br>TUBB6,<br>TUBA1B,<br>TUBB3,<br>TUBA1C,<br>GTSE1 | 1020 | 36 | 16792 | 3.658<br>388 | 1 | 0.462934 | 9.18<br>553  |
| GOTERM_B<br>P_DIRECT | G0:0<br>0302<br>16~k<br>erat                                             | 12 | 0.9<br>819<br>97 | 0.005<br>936 | NOTCH1,<br>CASP3,<br>S100A7,<br>SPRR2D,                                     | 1020 | 76 | 16792 | 2.599<br>381 | 1 | 0.492531 | 10.3<br>057  |

|                  |                                            |    |          |          |                                                                                  |      |     |       |          |   |          |          |
|------------------|--------------------------------------------|----|----------|----------|----------------------------------------------------------------------------------|------|-----|-------|----------|---|----------|----------|
|                  | inocyte differentiation                    |    |          |          | KRT16, SPRR1B, TGM1, ST14, IVL, INTU, SCEL, ADAM9                                |      |     |       |          |   |          |          |
| GOTERM_BP_DIRECT | G0:0050796~regulation of insulin secretion | 11 | 0.900164 | 0.006857 | ICA1, SLC2A1, SYT9, RAPGEF4, GNAS, RAPGEF3, ITPR3, ABCC8, CACNA1D, KCNJ11, ITPR1 | 1020 | 67  | 16792 | 2.702839 | 1 | 0.531682 | 11.81127 |
| GOTERM_BP_DIRECT | G0:0007411~axon guidance                   | 19 | 1.554828 | 0.007904 | ZNF280D, B4GAT1, WNT3A, EFNA2, EFNA3, NECTIN1, SMAD4, DPYSL5,                    | 1020 | 159 | 16792 | 1.967246 | 1 | 0.571536 | 13.49409 |

|                      |                                                                                                                |    |                  |              |                                                                                                                   |      |    |       |             |   |          |              |
|----------------------|----------------------------------------------------------------------------------------------------------------|----|------------------|--------------|-------------------------------------------------------------------------------------------------------------------|------|----|-------|-------------|---|----------|--------------|
|                      |                                                                                                                |    |                  |              | NTN4,<br>ARHGAP35,<br>EVL,<br>L1CAM,<br>TTC8,<br>GLI3,<br>GATA3,<br>SPTBN2,<br>ANOS1,<br>SIAH2,<br>TUBB3          |      |    |       |             |   |          |              |
| GOTERM_B<br>P_DIRECT | G0:0<br>0311<br>45~a<br>naph<br>ase-<br>prom<br>otin<br>g<br>comp<br>lex-<br>depe<br>nden<br>t<br>cata<br>boli | 12 | 0.9<br>819<br>97 | 0.007<br>947 | CCNB1,<br>CDK1,<br>PLK1,<br>PSMB2,<br>AURKA,<br>CDC20,<br>PSME4,<br>AURKB,<br>UBE2C,<br>PSMA7,<br>PSMD7,<br>UBE2S | 1020 | 79 | 16792 | 2.500<br>67 | 1 | 0.562369 | 13.5<br>6294 |

|                      | c<br>proc<br>ess                                                                   |    |                  |              |                                                                                                                      |      |    |       |              |   |          |              |
|----------------------|------------------------------------------------------------------------------------|----|------------------|--------------|----------------------------------------------------------------------------------------------------------------------|------|----|-------|--------------|---|----------|--------------|
| GOTERM_B<br>P_DIRECT | G0:0<br>0323<br>55~r<br>espo<br>nse<br>to<br>estr<br>adio<br>l                     | 13 | 1.0<br>638<br>3  | 0.008<br>778 | RAMP2,<br>DNMT3A,<br>ASS1, TH,<br>EZH2,<br>ESR1,<br>CST3,<br>FGF10,<br>MMP15,<br>KCNJ11,<br>GPI,<br>CASP3,<br>DNMT3B | 1020 | 91 | 16792 | 2.351<br>821 | 1 | 0.587842 | 14.8<br>7656 |
| GOTERM_B<br>P_DIRECT | G0:0<br>0519<br>83~r<br>egul<br>atio<br>n of<br>chro<br>moso<br>me<br>segr<br>egat | 4  | 0.3<br>273<br>32 | 0.009<br>908 | KIF2C,<br>MKI67,<br>BUB1,<br>AURKB                                                                                   | 1020 | 8  | 16792 | 8.231<br>373 | 1 | 0.621834 | 16.6<br>3206 |

|                      |                                                                                                                         |   |                  |              |                                                  |      |    |       |              |   |          |              |
|----------------------|-------------------------------------------------------------------------------------------------------------------------|---|------------------|--------------|--------------------------------------------------|------|----|-------|--------------|---|----------|--------------|
|                      | ion                                                                                                                     |   |                  |              |                                                  |      |    |       |              |   |          |              |
| GOTERM_B<br>P_DIRECT | G0:0<br>0100<br>46~r<br>espo<br>nse<br>to<br>myco<br>toxi<br>n                                                          | 3 | 0.2<br>454<br>99 | 0.010<br>592 | LCN2,<br>BAK1, ASS1                              | 1020 | 3  | 16792 | 16.46<br>275 | 1 | 0.636138 | 17.6<br>7727 |
| GOTERM_B<br>P_DIRECT | G0:0<br>0000<br>83~r<br>egul<br>atio<br>n of<br>tran<br>scri<br>ptio<br>n<br>invo<br>lved<br>in<br>G1/S<br>tran<br>siti | 6 | 0.4<br>909<br>98 | 0.010<br>966 | CCNE1,<br>CDK1,<br>CDC45,<br>RRM2,<br>ORC1, CDT1 | 1020 | 23 | 16792 | 4.294<br>629 | 1 | 0.638902 | 18.2<br>4428 |

|                      |                                                                                                                                                |   |                  |              |                                                        |      |    |       |              |   |          |              |
|----------------------|------------------------------------------------------------------------------------------------------------------------------------------------|---|------------------|--------------|--------------------------------------------------------|------|----|-------|--------------|---|----------|--------------|
|                      | on<br>of<br>mito<br>tic<br>cell<br>cycl<br>e                                                                                                   |   |                  |              |                                                        |      |    |       |              |   |          |              |
| GOTERM_B<br>P_DIRECT | G0:0<br>0311<br>46~S<br>CF-d<br>epen<br>dent<br>prot<br>easo<br>mal<br>ubiq<br>uiti<br>n-de<br>pend<br>ent<br>prot<br>ein<br>cata<br>boli<br>c | 6 | 0.4<br>909<br>98 | 0.013<br>175 | BTRC,<br>CCNF,<br>FBXW4,<br>FBXL5,<br>FBX04,<br>FBX036 | 1020 | 24 | 16792 | 4.115<br>686 | 1 | 0.696658 | 21.5<br>1608 |

|                      |                                                                                                                                                                               |   |                  |            |                                                                |      |    |       |              |   |          |              |
|----------------------|-------------------------------------------------------------------------------------------------------------------------------------------------------------------------------|---|------------------|------------|----------------------------------------------------------------|------|----|-------|--------------|---|----------|--------------|
|                      | proc<br>ess                                                                                                                                                                   |   |                  |            |                                                                |      |    |       |              |   |          |              |
| GOTERM_B<br>P_DIRECT | G0:0<br>0700<br>59~i<br>ntri<br>nsic<br>apop<br>toti<br>c<br>sign<br>alin<br>g<br>path<br>way<br>in<br>resp<br>onse<br>to<br>endo<br>plas<br>mic<br>reti<br>culu<br>m<br>stre | 7 | 0.5<br>728<br>31 | 0.013<br>3 | BAK1,<br>CEBPB,<br>XBP1,<br>CHAC1,<br>BCL2,<br>TRIB3,<br>ITPR1 | 1020 | 33 | 16792 | 3.492<br>097 | 1 | 0.690706 | 21.6<br>9838 |

|                      |                                                                                               |   |                  |              |                                                                              |      |    |       |              |   |          |              |
|----------------------|-----------------------------------------------------------------------------------------------|---|------------------|--------------|------------------------------------------------------------------------------|------|----|-------|--------------|---|----------|--------------|
|                      | ss                                                                                            |   |                  |              |                                                                              |      |    |       |              |   |          |              |
| GOTERM_B<br>P_DIRECT | G0:0<br>0340<br>80~C<br>ENP-<br>A<br>cont<br>aini<br>ng<br>nucl<br>eoso<br>me<br>asse<br>mbly | 8 | 0.6<br>546<br>64 | 0.014<br>066 | CENPO,<br>CENPN,<br>CENPA,<br>HJURP,<br>MIS18A,<br>CENPP,<br>CENPW,<br>CENPI | 1020 | 43 | 16792 | 3.062<br>836 | 1 | 0.701942 | 22.8<br>0109 |
| GOTERM_B<br>P_DIRECT | G0:0<br>0333<br>14~m<br>itot<br>ic<br>DNA<br>repl<br>icat<br>ion<br>chec<br>kpoi<br>nt        | 4 | 0.3<br>273<br>32 | 0.014<br>198 | CLSPN,<br>TICRR,<br>RAD17,<br>NAE1                                           | 1020 | 9  | 16792 | 7.316<br>776 | 1 | 0.696429 | 22.9<br>9026 |

|                      |                                                                                                                                                              |   |                  |              |                                    |      |   |       |              |   |          |              |
|----------------------|--------------------------------------------------------------------------------------------------------------------------------------------------------------|---|------------------|--------------|------------------------------------|------|---|-------|--------------|---|----------|--------------|
| GOTERM_B<br>P_DIRECT | GO:1<br>9048<br>51~p<br>osit<br>ive<br>regu<br>lati<br>on<br>of<br>esta<br>blis<br>hmen<br>t of<br>prot<br>ein<br>loca<br>liza<br>tion<br>to<br>telo<br>mere | 4 | 0.3<br>273<br>32 | 0.014<br>198 | CCT5,<br>TCP1,<br>DKC1,<br>CCT6A   | 1020 | 9 | 16792 | 7.316<br>776 | 1 | 0.696429 | 22.9<br>9026 |
| GOTERM_B<br>P_DIRECT | GO:0<br>0311<br>10~r<br>egul<br>atio                                                                                                                         | 4 | 0.3<br>273<br>32 | 0.014<br>198 | SKA3,<br>STMN1,<br>SKA1,<br>CLASP2 | 1020 | 9 | 16792 | 7.316<br>776 | 1 | 0.696429 | 22.9<br>9026 |

|                      |                                                                                                 |   |                  |              |                                    |      |   |       |              |   |          |              |
|----------------------|-------------------------------------------------------------------------------------------------|---|------------------|--------------|------------------------------------|------|---|-------|--------------|---|----------|--------------|
|                      | n of<br>micr<br>otub<br>ule<br>poly<br>meri<br>zati<br>on<br>or<br>depo<br>lyme<br>riza<br>tion |   |                  |              |                                    |      |   |       |              |   |          |              |
| GOTERM_B<br>P_DIRECT | G0:1<br>9046<br>68~p<br>osit<br>ive<br>regu<br>lati<br>on<br>of<br>ubiq<br>uiti<br>n<br>prot    | 4 | 0.3<br>273<br>32 | 0.014<br>198 | PLK1,<br>CDC20,<br>UBE2C,<br>UBE2S | 1020 | 9 | 16792 | 7.316<br>776 | 1 | 0.696429 | 22.9<br>9026 |

|                      |                                                          |    |                  |              |                                                                                                                                                                                                         |      |     |       |              |   |          |              |
|----------------------|----------------------------------------------------------|----|------------------|--------------|---------------------------------------------------------------------------------------------------------------------------------------------------------------------------------------------------------|------|-----|-------|--------------|---|----------|--------------|
|                      | ein<br>liga<br>se<br>acti<br>vity                        |    |                  |              |                                                                                                                                                                                                         |      |     |       |              |   |          |              |
| GOTERM_B<br>P_DIRECT | GO:0<br>0082<br>83~c<br>ell<br>prol<br>ifer<br>atio<br>n | 34 | 2.7<br>823<br>24 | 0.014<br>983 | STIL,<br>ERBB4,<br>E2F8,<br>AURKB,<br>MCM10,<br>PRDX1,<br>SRC,<br>FAM83D,<br>KIF2C,<br>BAK1,<br>FAM83B,<br>DKC1,<br>BCL2,<br>BUB1,<br>TGFA,<br>RAPGEF3,<br>NRDC,<br>CDK1,<br>PDXK,<br>MKI67,<br>DLGAP5, | 1020 | 366 | 16792 | 1.529<br>326 | 1 | 0.707278 | 24.1<br>0191 |

|                      |                                                           |    |                  |              |                                                                                                                           |      |     |       |              |   |          |              |
|----------------------|-----------------------------------------------------------|----|------------------|--------------|---------------------------------------------------------------------------------------------------------------------------|------|-----|-------|--------------|---|----------|--------------|
|                      |                                                           |    |                  |              | TPX2,<br>SMAD4,<br>TNFSF9,<br>CDC25A,<br>OGFOD1,<br>UHRF1,<br>RASGRF1,<br>KRT16,<br>PLK1,<br>CHRM1,<br>TXN, LRP2,<br>MELK |      |     |       |              |   |          |              |
| GOTERM_B<br>P_DIRECT | G0:0<br>0436<br>27~r<br>espo<br>nse<br>to<br>estr<br>ogen | 10 | 0.8<br>183<br>31 | 0.016<br>132 | HSP90AA1,<br>IL4R,<br>OPRK1,<br>GATA3,<br>ESR1,<br>SRD5A1,<br>ABCC2,<br>CD24, GAL,<br>GLI3                                | 1020 | 65  | 16792 | 2.532<br>73  | 1 | 0.725478 | 25.7<br>029  |
| GOTERM_B<br>P_DIRECT | G0:0<br>0160<br>55~W<br>nt<br>sign                        | 20 | 1.6<br>366<br>61 | 0.019<br>136 | FZD9,<br>BTRC,<br>WNT3A,<br>TLE3,<br>TLE1,                                                                                | 1020 | 187 | 16792 | 1.760<br>721 | 1 | 0.77708  | 29.7<br>4039 |

|                      |                                            |    |          |          |                                                                                                                                                        |      |     |       |          |   |         |          |
|----------------------|--------------------------------------------|----|----------|----------|--------------------------------------------------------------------------------------------------------------------------------------------------------|------|-----|-------|----------|---|---------|----------|
|                      | align<br>pathway                           |    |          |          | ARL6,<br>CALCOC01,<br>CTNNBIP1,<br>CSNK2A2,<br>CCNE1,<br>RSP04,<br>AMER1,<br>NXN,<br>KREMEN2,<br>FBXW4,<br>BRD7,<br>VPS35,<br>MCC,<br>CSNK1G3,<br>CD24 |      |     |       |          |   |         |          |
| GOTERM_B<br>P_DIRECT | GO:001701~intestinal embryonic development | 20 | 1.636661 | 0.019136 | STIL,<br>TAPT1,<br>UBE2A,<br>WNT3A,<br>MYO1E,<br>SMAD4,<br>GJB3,<br>GLI3,<br>CCNB1,<br>GPI,<br>NOTCH1,                                                 | 1020 | 187 | 16792 | 1.760721 | 1 | 0.77708 | 29.74039 |

|                      |                                                                                               |   |                  |             |                                                                                      |      |    |       |              |   |          |              |
|----------------------|-----------------------------------------------------------------------------------------------|---|------------------|-------------|--------------------------------------------------------------------------------------|------|----|-------|--------------|---|----------|--------------|
|                      | ent                                                                                           |   |                  |             | WDR19,<br>MYO18B,<br>CHD7,<br>CCNB2,<br>GATA3,<br>BTF3,<br>APBA2,<br>TCTN1,<br>FOSL1 |      |    |       |              |   |          |              |
| GOTERM_B<br>P_DIRECT | G0:0<br>0457<br>24~p<br>osit<br>ive<br>regu<br>lati<br>on<br>of<br>cili<br>um<br>asse<br>mbly | 4 | 0.3<br>273<br>32 | 0.019<br>38 | BBS4,<br>TAPT1,<br>CEP120,<br>ARHGAP35                                               | 1020 | 10 | 16792 | 6.585<br>098 | 1 | 0.773838 | 30.0<br>5936 |
| GOTERM_B<br>P_DIRECT | G0:0<br>0600<br>09~S<br>erto                                                                  | 4 | 0.3<br>273<br>32 | 0.019<br>38 | SDC1,<br>CST3,<br>DMRT1,<br>HSD17B4                                                  | 1020 | 10 | 16792 | 6.585<br>098 | 1 | 0.773838 | 30.0<br>5936 |

|                      |                                                                                                                |   |                  |              |                                                                  |      |    |       |              |   |          |              |
|----------------------|----------------------------------------------------------------------------------------------------------------|---|------------------|--------------|------------------------------------------------------------------|------|----|-------|--------------|---|----------|--------------|
|                      | li<br>cell<br>deve<br>lop<br>ment                                                                              |   |                  |              |                                                                  |      |    |       |              |   |          |              |
| GOTERM_B<br>P_DIRECT | G0:0<br>0720<br>15~g<br>lome<br>rula<br>r<br>visc<br>eral<br>epit<br>heli<br>al<br>cell<br>deve<br>lop<br>ment | 4 | 0.3<br>273<br>32 | 0.019<br>38  | MAGI2,<br>MYO1E,<br>NUP93,<br>GLCCI1                             | 1020 | 10 | 16792 | 6.585<br>098 | 1 | 0.773838 | 30.0<br>5936 |
| GOTERM_B<br>P_DIRECT | G0:0<br>0309<br>00~f<br>oreb<br>rain<br>deve                                                                   | 8 | 0.6<br>546<br>64 | 0.019<br>981 | STIL,<br>NOTCH1,<br>DYNC2H1,<br>ARHGAP35,<br>LRP2,<br>CHRD, SRC, | 1020 | 46 | 16792 | 2.863<br>086 | 1 | 0.776811 | 30.8<br>3816 |

|                  |                                           |    |          |          |                               |      |    |       |          |   |          |          |
|------------------|-------------------------------------------|----|----------|----------|-------------------------------|------|----|-------|----------|---|----------|----------|
|                  | lopment                                   |    |          |          | DCLK1                         |      |    |       |          |   |          |          |
| GOTERM_BP_DIRECT | G0:006564~L-serine biosynthetic process   | 3  | 0.245499 | 0.020332 | SHMT2, PSAT1, PSPH            | 1020 | 4  | 16792 | 12.34706 | 1 | 0.775499 | 31.28926 |
| GOTERM_BP_DIRECT | G0:0061512~protein localization to cilium | 5  | 0.409165 | 0.020822 | BBS1, BBS4, ARL6, EHD1, WDR35 | 1020 | 18 | 16792 | 4.572985 | 1 | 0.776495 | 31.9134  |
| GOTERM_BP_DIRECT | G0:0035264~m                              | 11 | 0.900164 | 0.022531 | STIL, XPA, TNS2, DHCR7,       | 1020 | 80 | 16792 | 2.263627 | 1 | 0.796001 | 34.05265 |

|                      |                                                                                                                                           |    |                  |             |                                                                                                                                |      |    |       |              |   |          |              |
|----------------------|-------------------------------------------------------------------------------------------------------------------------------------------|----|------------------|-------------|--------------------------------------------------------------------------------------------------------------------------------|------|----|-------|--------------|---|----------|--------------|
|                      | ulti<br>cell<br>ular<br>orga<br>nism<br>grow<br>th                                                                                        |    |                  |             | SPTBN2,<br>APBA2,<br>GNAS, EN1,<br>TTC8,<br>SLITRK6,<br>CTC1                                                                   |      |    |       |              |   |          |              |
| GOTERM_B<br>P_DIRECT | G0:0<br>0198<br>86~a<br>ntig<br>en<br>proc<br>essi<br>ng<br>and<br>pres<br>enta<br>tion<br>of<br>exog<br>enou<br>s<br>pept<br>ide<br>anti | 12 | 0.9<br>819<br>97 | 0.023<br>28 | KIF23,<br>KIF2C,<br>KIF4B,<br>DYNC1LI2,<br>KIF4A,<br>DYNC2LI1,<br>KIF18A,<br>SPTBN2,<br>DYNC2H1,<br>RACGAP1,<br>DCTN4,<br>CTSV | 1020 | 92 | 16792 | 2.147<br>315 | 1 | 0.800155 | 34.9<br>6906 |

|                      |                                          |    |                  |              |                                                                                                                                                                                                                     |      |     |       |              |   |          |              |
|----------------------|------------------------------------------|----|------------------|--------------|---------------------------------------------------------------------------------------------------------------------------------------------------------------------------------------------------------------------|------|-----|-------|--------------|---|----------|--------------|
|                      | gen<br>via<br>MHC<br>clas<br>s II        |    |                  |              |                                                                                                                                                                                                                     |      |     |       |              |   |          |              |
| GOTERM_B<br>P_DIRECT | G0:0<br>0070<br>49~c<br>e11<br>cycl<br>e | 22 | 1.8<br>003<br>27 | 0.023<br>366 | E2F2,<br>APEX2,<br>FOXM1,<br>SUV39H1,<br>AURKA,<br>CDC20,<br>AURKB,<br>SRC,<br>SUV39H2,<br>SPAG8,<br>UHRF1,<br>HJURP,<br>USP39,<br>BRD7,<br>CABLES2,<br>CAMK1,<br>RBM38,<br>SIAH2,<br>CHAF1B,<br>CCNDBP1,<br>RAD17, | 1020 | 217 | 16792 | 1.669<br>034 | 1 | 0.794959 | 35.0<br>7372 |

|                      |                                                                                    |    |          |          |                                                                                                                                                                             |      |     |       |          |   |          |          |
|----------------------|------------------------------------------------------------------------------------|----|----------|----------|-----------------------------------------------------------------------------------------------------------------------------------------------------------------------------|------|-----|-------|----------|---|----------|----------|
|                      |                                                                                    |    |          |          | CREBL2                                                                                                                                                                      |      |     |       |          |   |          |          |
| GOTERM_B<br>P_DIRECT | GO:0001222<br>negative regulation of transcription from RNA polymerase II promoter | 58 | 4.746318 | 0.023523 | LMO1, IMPACT, E2F8, EZH2, CBX2, AURKB, ZNF345, TCEAL1, GLI3, CBX7, N4BP2L2, CRY2, PCBP3, GATA3, ELP2, BEND3, ZNF280D, RCOR3, SOX11, ESR1, DMRT1, TLE1, UBE2I, ASCL2, UHRF1, | 1020 | 720 | 16792 | 1.326166 | 1 | 0.790842 | 35.26452 |

|  |  |  |  |                                                                                                                                                                                                                                                                          |  |  |  |  |  |
|--|--|--|--|--------------------------------------------------------------------------------------------------------------------------------------------------------------------------------------------------------------------------------------------------------------------------|--|--|--|--|--|
|  |  |  |  | BTG2,<br>IGBP1,<br>TXN,<br>TFAP2C,<br>TSHZ1,<br>FOXM1,<br>TRIB3,<br>ZBTB14,<br>ARHGAP35,<br>XBP1,<br>OVOL1,<br>NEDD4L,<br>BHLHE40,<br>DNMT3B,<br>TCF3,<br>KLF5,<br>DNMT3A,<br>SMAD4,<br>SUV39H1,<br>EN1,<br>SMYD2,<br>SNAI1,<br>SUV39H2,<br>SALL2,<br>NOTCH1,<br>ZNF217, |  |  |  |  |  |
|--|--|--|--|--------------------------------------------------------------------------------------------------------------------------------------------------------------------------------------------------------------------------------------------------------------------------|--|--|--|--|--|

|                      |                                                                                         |   |                  |              |                                                                          |      |    |       |              |   |          |              |
|----------------------|-----------------------------------------------------------------------------------------|---|------------------|--------------|--------------------------------------------------------------------------|------|----|-------|--------------|---|----------|--------------|
|                      |                                                                                         |   |                  |              | PLK1,<br>MZF1,<br>ZBTB4,<br>PHF21A,<br>LRP8,<br>RERE,<br>HDAC7           |      |    |       |              |   |          |              |
| GOTERM_B<br>P_DIRECT | G0:0<br>0314<br>24~k<br>erat<br>iniz<br>atio<br>n                                       | 8 | 0.6<br>546<br>64 | 0.024<br>774 | SPRR2D,<br>KRT16,<br>CASP14,<br>SPRR1B,<br>TGM1,<br>CDH3, IVL,<br>ABCA12 | 1020 | 48 | 16792 | 2.743<br>791 | 1 | 0.801663 | 36.7<br>624  |
| GOTERM_B<br>P_DIRECT | G0:1<br>9033<br>64~p<br>osit<br>ive<br>regu<br>lati<br>on<br>of<br>cell<br>ular<br>prot | 4 | 0.3<br>273<br>32 | 0.025<br>466 | AMER1,<br>PTTG1IP,<br>FBXL5,<br>VPS35                                    | 1020 | 11 | 16792 | 5.986<br>453 | 1 | 0.804614 | 37.5<br>7753 |

|                      |                                                                                        |   |                  |              |                                                                    |      |    |       |              |   |          |              |
|----------------------|----------------------------------------------------------------------------------------|---|------------------|--------------|--------------------------------------------------------------------|------|----|-------|--------------|---|----------|--------------|
|                      | ein<br>cata<br>boli<br>c<br>proc<br>ess                                                |   |                  |              |                                                                    |      |    |       |              |   |          |              |
| GOTERM_B<br>P_DIRECT | G0:0<br>0066<br>05~p<br>rote<br>in<br>targ<br>etin<br>g                                | 7 | 0.5<br>728<br>31 | 0.028<br>838 | YWHAZ,<br>HOMER3,<br>TRAK1,<br>HPS4,<br>YWHAQ,<br>GIPC1,<br>KIF13B | 1020 | 39 | 16792 | 2.954<br>852 | 1 | 0.837728 | 41.4<br>0731 |
| GOTERM_B<br>P_DIRECT | G0:1<br>9027<br>49~r<br>egul<br>atio<br>n of<br>cell<br>cycl<br>e<br>G2/M<br>phas<br>e | 3 | 0.2<br>454<br>99 | 0.032<br>533 | PLK1,<br>NEK10,<br>GTSE1                                           | 1020 | 5  | 16792 | 9.877<br>647 | 1 | 0.867172 | 45.3<br>4923 |

|                      |                                                                                                            |   |                  |              |                               |      |   |       |              |   |          |              |
|----------------------|------------------------------------------------------------------------------------------------------------|---|------------------|--------------|-------------------------------|------|---|-------|--------------|---|----------|--------------|
|                      | tran<br>siti<br>on                                                                                         |   |                  |              |                               |      |   |       |              |   |          |              |
| GOTERM_B<br>P_DIRECT | G0:0<br>0303<br>11~p<br>oly-<br>N-ac<br>etyl<br>lact<br>osam<br>ine<br>bios<br>ynth<br>etic<br>proc<br>ess | 3 | 0.2<br>454<br>99 | 0.032<br>533 | B4GAT1,<br>B3GNT4,<br>B3GNT3  | 1020 | 5 | 16792 | 9.877<br>647 | 1 | 0.867172 | 45.3<br>4923 |
| GOTERM_B<br>P_DIRECT | G0:0<br>0361<br>24~h<br>isto<br>ne<br>H3-K<br>9<br>trim<br>ethy                                            | 3 | 0.2<br>454<br>99 | 0.032<br>533 | BEND3,<br>SUV39H1,<br>SUV39H2 | 1020 | 5 | 16792 | 9.877<br>647 | 1 | 0.867172 | 45.3<br>4923 |

|                      |                                                                                                       |   |                  |              |                            |      |   |       |              |   |          |              |
|----------------------|-------------------------------------------------------------------------------------------------------|---|------------------|--------------|----------------------------|------|---|-------|--------------|---|----------|--------------|
|                      | lation                                                                                                |   |                  |              |                            |      |   |       |              |   |          |              |
| GOTERM_B<br>P_DIRECT | G0:1<br>9019<br>85~p<br>osit<br>ive<br>regu<br>lati<br>on<br>of<br>prot<br>ein<br>acet<br>ylat<br>ion | 3 | 0.2<br>454<br>99 | 0.032<br>533 | XBP1,<br>CAMK1,<br>RAPGEF3 | 1020 | 5 | 16792 | 9.877<br>647 | 1 | 0.867172 | 45.3<br>4923 |
| GOTERM_B<br>P_DIRECT | G0:0<br>0519<br>02~n<br>egat<br>ive<br>regu<br>lati<br>on<br>of<br>mito                               | 3 | 0.2<br>454<br>99 | 0.032<br>533 | FZD9,<br>BCL2, SRC         | 1020 | 5 | 16792 | 9.877<br>647 | 1 | 0.867172 | 45.3<br>4923 |

|                  |                                   |    |          |          |                      |      |    |       |          |   |          |          |
|------------------|-----------------------------------|----|----------|----------|----------------------|------|----|-------|----------|---|----------|----------|
|                  | chondrial depolarization          |    |          |          |                      |      |    |       |          |   |          |          |
| GOTERM_BP_DIRECT | G0:0018101~protein citrullination | 3  | 0.245499 | 0.032533 | PADI3, PADI2, PADI1  | 1020 | 5  | 16792 | 9.877647 | 1 | 0.867172 | 45.34923 |
| GOTERM_BP_DIRECT | G0:0002934~desmosome organization | 3  | 0.245499 | 0.032533 | NECTIN1, PERP, GRHL1 | 1020 | 5  | 16792 | 9.877647 | 1 | 0.867172 | 45.34923 |
| GOTERM_BP_DIRECT | G0:00096                          | 11 | 0.9001   | 0.032739 | DNMT3A, CDK1, XPA,   | 1020 | 85 | 16792 | 2.130473 | 1 | 0.864128 | 45.5612  |

|                      |                                                                           |   |                  |              |                                                                          |      |    |       |              |   |          |              |
|----------------------|---------------------------------------------------------------------------|---|------------------|--------------|--------------------------------------------------------------------------|------|----|-------|--------------|---|----------|--------------|
|                      | 36~r<br>espo<br>nse<br>to<br>toxi<br>c<br>subs<br>tanc<br>e               |   | 64               |              | SDC1,<br>BCL2,<br>CST3,<br>EPHX2,<br>CDH1,<br>HTR1D,<br>DNMT3B,<br>RAD51 |      |    |       |              |   |          |              |
| GOTERM_B<br>P_DIRECT | G0:0<br>0425<br>42~r<br>espo<br>nse<br>to<br>hydr<br>ogen<br>pero<br>xide | 8 | 0.6<br>546<br>64 | 0.033<br>349 | BAK1,<br>CASP3,<br>SDC1,<br>BCL2,<br>PRDX3,<br>FOSL1,<br>SRC, ADAM9      | 1020 | 51 | 16792 | 2.582<br>391 | 1 | 0.864505 | 46.1<br>852  |
| GOTERM_B<br>P_DIRECT | G0:2<br>0003<br>78~n<br>egat<br>ive<br>regu<br>lati                       | 5 | 0.4<br>091<br>65 | 0.035<br>276 | G6PD,<br>BECN1,<br>BCL2,<br>SIRT3,<br>MYCN                               | 1020 | 21 | 16792 | 3.919<br>701 | 1 | 0.875138 | 48.1<br>1168 |

|                      |                                                                                                |   |                  |              |                                        |      |    |       |              |   |          |              |
|----------------------|------------------------------------------------------------------------------------------------|---|------------------|--------------|----------------------------------------|------|----|-------|--------------|---|----------|--------------|
|                      | on<br>of<br>reac<br>tive<br>oxyg<br>en<br>spec<br>ies<br>meta<br>boli<br>c<br>proc<br>ess      |   |                  |              |                                        |      |    |       |              |   |          |              |
| GOTERM_B<br>P_DIRECT | G0:1<br>9001<br>82~p<br>osit<br>ive<br>regu<br>lati<br>on<br>of<br>prot<br>ein<br>loca<br>liza | 5 | 0.4<br>091<br>65 | 0.035<br>276 | CDK1,<br>TRIM8,<br>PLK1, SRC,<br>GTSE1 | 1020 | 21 | 16792 | 3.919<br>701 | 1 | 0.875138 | 48.1<br>1168 |

|                      |                                                                                                                                                                  |    |                  |              |                                                                                              |      |    |       |              |   |        |              |
|----------------------|------------------------------------------------------------------------------------------------------------------------------------------------------------------|----|------------------|--------------|----------------------------------------------------------------------------------------------|------|----|-------|--------------|---|--------|--------------|
|                      | tion<br>to<br>nucl<br>eus                                                                                                                                        |    |                  |              |                                                                                              |      |    |       |              |   |        |              |
| GOTERM_B<br>P_DIRECT | G0:0<br>0514<br>37~p<br>osit<br>ive<br>regu<br>lati<br>on<br>of<br>ubiq<br>uiti<br>n-pr<br>otei<br>n<br>liga<br>se<br>acti<br>vity<br>invo<br>lved<br>in<br>regu | 10 | 0.8<br>183<br>31 | 0.040<br>041 | CCNB1,<br>CDK1,<br>PLK1,<br>BTRC,<br>PSMB2,<br>CDC20,<br>PSME4,<br>UBE2C,<br>PSMA7,<br>PSMD7 | 1020 | 76 | 16792 | 2.166<br>151 | 1 | 0.9025 | 52.5<br>9868 |

|                      |                                                                                              |    |                  |              |                                                                                                                                                     |      |     |       |              |   |          |              |
|----------------------|----------------------------------------------------------------------------------------------|----|------------------|--------------|-----------------------------------------------------------------------------------------------------------------------------------------------------|------|-----|-------|--------------|---|----------|--------------|
|                      | lation<br>of<br>mitotic<br>cell<br>cycle<br>transition                                       |    |                  |              |                                                                                                                                                     |      |     |       |              |   |          |              |
| GOTERM_B<br>P_DIRECT | G0:0<br>0431<br>61~p<br>roteasom<br>e-mediat<br>ed<br>ubiquiti<br>n-depend<br>ent<br>protein | 20 | 1.6<br>366<br>61 | 0.040<br>078 | CDK1,<br>UBE2A,<br>BTRC,<br>ABTB2,<br>CDC20,<br>UBE2C,<br>ZNRF1,<br>PSMA7,<br>KCTD5,<br>RNF222,<br>GTSE1,<br>AMER1,<br>UBXN2A,<br>PSMB2,<br>NEDD4L, | 1020 | 203 | 16792 | 1.621<br>945 | 1 | 0.898927 | 52.6<br>3223 |

|                  |                                                                               |   |          |          |                                   |      |    |       |         |   |          |         |
|------------------|-------------------------------------------------------------------------------|---|----------|----------|-----------------------------------|------|----|-------|---------|---|----------|---------|
|                  | catabolic process                                                             |   |          |          | SMURF1, PSME4, SIAH2, PSMD7, SPOP |      |    |       |         |   |          |         |
| GOTERM_BP_DIRECT | G0:1900025~negative regulation of substrate adhesion-dependent cell spreading | 4 | 0.327332 | 0.040331 | COR01C, RCC2, ACTN4, AP1AR        | 1020 | 13 | 16792 | 5.06546 | 1 | 0.896633 | 52.8597 |

|                      |                                                      |    |                  |              |                                                                                                                                                                                                                                                |      |     |       |              |   |          |              |
|----------------------|------------------------------------------------------|----|------------------|--------------|------------------------------------------------------------------------------------------------------------------------------------------------------------------------------------------------------------------------------------------------|------|-----|-------|--------------|---|----------|--------------|
| GOTERM_B<br>P_DIRECT | GO:0<br>0986<br>09~c<br>ell-<br>cell<br>adhe<br>sion | 25 | 2.0<br>458<br>27 | 0.040<br>746 | VASN,<br>F11R,<br>YWHAZ,<br>S100P,<br>STK38,<br>LAD1,<br>DIAPH3,<br>S100A11,<br>PFKP,<br>ARFIP2,<br>SNX1,<br>GIPC1,<br>ANLN,<br>EIF2A,<br>TAGLN2,<br>PRDX1,<br>PKM,<br>PLCB3,<br>CCNB2,<br>LRRC59,<br>SPTBN2,<br>DNAJB1,<br>PERP,<br>EHD1, TES | 1020 | 271 | 16792 | 1.518<br>703 | 1 | 0.895329 | 53.2<br>3104 |
| GOTERM_B<br>P_DIRECT | GO:0<br>0708                                         | 6  | 0.4<br>909       | 0.041<br>947 | F11R,<br>RAMP2,                                                                                                                                                                                                                                | 1020 | 32  | 16792 | 3.086<br>765 | 1 | 0.898591 | 54.2<br>895  |

|                      |                                                                                       |   |                  |             |                                         |      |   |       |              |   |         |              |
|----------------------|---------------------------------------------------------------------------------------|---|------------------|-------------|-----------------------------------------|------|---|-------|--------------|---|---------|--------------|
|                      | 30~b<br>icel<br>lula<br>r<br>tigh<br>t<br>junc<br>tion<br>asse<br>mbly                |   | 98               |             | ACTN4,<br>CLDN3,<br>MARVELD3,<br>FRMPD2 |      |   |       |              |   |         |              |
| GOTERM_B<br>P_DIRECT | G0:0<br>0711<br>68~p<br>rote<br>in<br>loca<br>liza<br>tion<br>to<br>chro<br>mati<br>n | 3 | 0.2<br>454<br>99 | 0.046<br>86 | PLK1,<br>EZH2, ESR1                     | 1020 | 6 | 16792 | 8.231<br>373 | 1 | 0.91984 | 58.3<br>8719 |
| GOTERM_B<br>P_DIRECT | G0:0<br>0465<br>78~r<br>egul                                                          | 3 | 0.2<br>454<br>99 | 0.046<br>86 | RASGRF1,<br>FOXM1,<br>SH2B2             | 1020 | 6 | 16792 | 8.231<br>373 | 1 | 0.91984 | 58.3<br>8719 |

|                      |                                                                                                |   |                  |             |                           |      |   |       |              |   |         |              |
|----------------------|------------------------------------------------------------------------------------------------|---|------------------|-------------|---------------------------|------|---|-------|--------------|---|---------|--------------|
|                      | atio<br>n of<br>Ras<br>prot<br>ein<br>sign<br>al<br>tran<br>sduc<br>tion                       |   |                  |             |                           |      |   |       |              |   |         |              |
| GOTERM_B<br>P_DIRECT | G0:0<br>0315<br>36~p<br>osit<br>ive<br>regu<br>lati<br>on<br>of<br>exit<br>from<br>mito<br>sis | 3 | 0.2<br>454<br>99 | 0.046<br>86 | BIRC5,<br>UBE2C,<br>CDCA5 | 1020 | 6 | 16792 | 8.231<br>373 | 1 | 0.91984 | 58.3<br>8719 |
| GOTERM_B<br>P_DIRECT | G0:2<br>0003<br>47~p                                                                           | 3 | 0.2<br>454<br>99 | 0.046<br>86 | HPN, XBP1,<br>WNT3A       | 1020 | 6 | 16792 | 8.231<br>373 | 1 | 0.91984 | 58.3<br>8719 |

|                  |                                                |   |          |         |                        |      |   |       |          |   |         |          |
|------------------|------------------------------------------------|---|----------|---------|------------------------|------|---|-------|----------|---|---------|----------|
|                  | ositive regulation of hepatocyte proliferation |   |          |         |                        |      |   |       |          |   |         |          |
| GOTERM_BP_DIRECT | GO:0023052~signaling                           | 3 | 0.245499 | 0.04686 | DLGAP3, DLGAP5, DLGAP4 | 1020 | 6 | 16792 | 8.231373 | 1 | 0.91984 | 58.38719 |
| GOTERM_BP_DIRECT | GO:0098532~histone H3-K27 trim                 | 3 | 0.245499 | 0.04686 | BEND3, EZH2, CHD5      | 1020 | 6 | 16792 | 8.231373 | 1 | 0.91984 | 58.38719 |

|                  |                                                            |   |          |          |                                       |      |    |       |          |   |          |          |
|------------------|------------------------------------------------------------|---|----------|----------|---------------------------------------|------|----|-------|----------|---|----------|----------|
|                  | ethylation                                                 |   |          |          |                                       |      |    |       |          |   |          |          |
| GOTERM_BP_DIRECT | G0:0051297~centrosome organization                         | 6 | 0.490998 | 0.047063 | BBS4, CEP120, PLK1, HAUS8, PCM1, CHD3 | 1020 | 33 | 16792 | 2.993226 | 1 | 0.917628 | 58.54857 |
| GOTERM_BP_DIRECT | G0:0051439~regulation of ubiquitin-protein ligase activity | 5 | 0.409165 | 0.047456 | CCNB1, CDK1, PLK1, CDC20, UBE2C       | 1020 | 23 | 16792 | 3.578858 | 1 | 0.916282 | 58.85996 |

|                      |                                                                                          |   |                  |              |                                                                                 |      |    |       |              |   |          |              |
|----------------------|------------------------------------------------------------------------------------------|---|------------------|--------------|---------------------------------------------------------------------------------|------|----|-------|--------------|---|----------|--------------|
|                      | vity<br>invo<br>lved<br>in<br>mito<br>tic<br>cell<br>cycl<br>e                           |   |                  |              |                                                                                 |      |    |       |              |   |          |              |
| GOTERM_B<br>P_DIRECT | GO:0<br>0073<br>68~d<br>eter<br>mina<br>tion<br>of<br>left<br>/rig<br>ht<br>symm<br>etry | 8 | 0.6<br>546<br>64 | 0.047<br>565 | STIL,<br>NOTCH1,<br>DYNC2LI1,<br>DYNC2H1,<br>FGF10,<br>PCSK6,<br>ARL6,<br>DNAH5 | 1020 | 55 | 16792 | 2.394<br>581 | 1 | 0.913668 | 58.9<br>4557 |
| GOTERM_B<br>P_DIRECT | GO:0<br>0068<br>79~c<br>ellu<br>lar                                                      | 7 | 0.5<br>728<br>31 | 0.048<br>441 | LCN2,<br>TTC7A,<br>CYBRD1,<br>NDFIP1,<br>SMAD4,                                 | 1020 | 44 | 16792 | 2.619<br>073 | 1 | 0.914533 | 59.6<br>2973 |

|                  |                                                |   |          |          |                                             |      |    |       |          |   |          |          |
|------------------|------------------------------------------------|---|----------|----------|---------------------------------------------|------|----|-------|----------|---|----------|----------|
|                  | iron homeostasis                               |   |          |          | SLC46A1, ABCG2                              |      |    |       |          |   |          |          |
| GOTERM_BP_DIRECT | G0:007077~mitotic nuclear envelope disassembly | 7 | 0.572831 | 0.048441 | CCNB1, CDK1, CCNB2, PLK1, RAE1, NUP93, NEK9 | 1020 | 44 | 16792 | 2.619073 | 1 | 0.914533 | 59.62973 |
| GOTERM_BP_DIRECT | G0:006065~uterus development                   | 4 | 0.327332 | 0.049077 | GATA3, SMAD4, ESR1, SRC                     | 1020 | 14 | 16792 | 4.703641 | 1 | 0.91432  | 60.11982 |
| GOTERM_BP        | G0:0                                           | 5 | 0.4      | 0.054    | BBS4,                                       | 1020 | 24 | 16792 | 3.429    | 1 | 0.932006 | 63.9     |

|                      |                                                                   |   |                  |              |                                                      |      |    |       |              |   |          |              |
|----------------------|-------------------------------------------------------------------|---|------------------|--------------|------------------------------------------------------|------|----|-------|--------------|---|----------|--------------|
| P_DIRECT             | 0469<br>07~i<br>ntra<br>cell<br>ular<br>tran<br>spor<br>t         |   | 091<br>65        | 312          | BBS5,<br>GNAS,<br>SPIRE2,<br>SDCBP2                  |      |    |       | 739          |   |          | 4618         |
| GOTERM_B<br>P_DIRECT | G0:0<br>0018<br>90~p<br>lace<br>nta<br>deve<br>lopment            | 6 | 0.4<br>909<br>98 | 0.058<br>355 | ASCL2,<br>DLX3,<br>E2F8,<br>CCNF,<br>GJB3,<br>PHLDA2 | 1020 | 35 | 16792 | 2.822<br>185 | 1 | 0.942407 | 66.6<br>6008 |
| GOTERM_B<br>P_DIRECT | G0:0<br>0316<br>48~p<br>rote<br>in<br>dest<br>abil<br>izat<br>ion | 6 | 0.4<br>909<br>98 | 0.058<br>355 | XBP1,<br>PLK1,<br>BTRC,<br>FBX04,<br>CHFR, SRC       | 1020 | 35 | 16792 | 2.822<br>185 | 1 | 0.942407 | 66.6<br>6008 |
| GOTERM_B             | G0:0                                                              | 4 | 0.3              | 0.058        | GINS1,                                               | 1020 | 15 | 16792 | 4.390        | 1 | 0.941019 | 66.8         |

|                      |                                                                                                            |   |                  |              |                                  |      |    |       |              |   |          |              |
|----------------------|------------------------------------------------------------------------------------------------------------|---|------------------|--------------|----------------------------------|------|----|-------|--------------|---|----------|--------------|
| P_DIRECT             | 0062<br>71~D<br>NA<br>stra<br>nd<br>elon<br>gati<br>on<br>invo<br>lved<br>in<br>DNA<br>repl<br>icat<br>ion |   | 273<br>32        | 662          | GINS3,<br>GINS4,<br>PRIM2        |      |    |       | 065          |   |          | 5819         |
| GOTERM_B<br>P_DIRECT | GO:0<br>0106<br>33~n<br>egat<br>ive<br>regu<br>lati<br>on<br>of<br>epit<br>heli                            | 4 | 0.3<br>273<br>32 | 0.058<br>662 | COR01C,<br>MARVELD3,<br>MCC, EVL | 1020 | 15 | 16792 | 4.390<br>065 | 1 | 0.941019 | 66.8<br>5819 |

|                      |                                                                                                                                                 |    |                  |              |                                  |      |    |       |              |   |          |              |
|----------------------|-------------------------------------------------------------------------------------------------------------------------------------------------|----|------------------|--------------|----------------------------------|------|----|-------|--------------|---|----------|--------------|
|                      | al<br>cell<br>migr<br>atio<br>n                                                                                                                 |    |                  |              |                                  |      |    |       |              |   |          |              |
| GOTERM_B<br>P_DIRECT | GO:1<br>9048<br>74~p<br>osit<br>ive<br>regu<br>lati<br>on<br>of<br>telo<br>mera<br>se<br>RNA<br>loca<br>liza<br>tion<br>to<br>Caja<br>l<br>body | 4  | 0.3<br>273<br>32 | 0.058<br>662 | CCT5,<br>TCP1,<br>DKC1,<br>CCT6A | 1020 | 15 | 16792 | 4.390<br>065 | 1 | 0.941019 | 66.8<br>5819 |
| GOTERM_B             | GO:0                                                                                                                                            | 10 | 0.8              | 0.060        | KIF23,                           | 1020 | 82 | 16792 | 2.007        | 1 | 0.942676 | 67.7         |

|                      |                                                                                                               |   |                  |              |                                                                                         |      |   |       |              |   |          |              |
|----------------------|---------------------------------------------------------------------------------------------------------------|---|------------------|--------------|-----------------------------------------------------------------------------------------|------|---|-------|--------------|---|----------|--------------|
| P_DIRECT             | 0068<br>90~r<br>etro<br>grad<br>e<br>vesi<br>cle-<br>medi<br>ated<br>tran<br>spor<br>t,<br>Golg<br>i to<br>ER |   | 183<br>31        | 021          | KDEL3,<br>COG4,<br>KIF2C,<br>KIF4B,<br>TMED7,<br>KIF4A,<br>ATP9B,<br>KIF18A,<br>RACGAP1 |      |   |       | 652          |   |          | 2167         |
| GOTERM_B<br>P_DIRECT | G0:0<br>0420<br>35~r<br>egul<br>atio<br>n of<br>cyto<br>kine<br>bios<br>ynth<br>etic                          | 3 | 0.2<br>454<br>99 | 0.063<br>011 | GATA3,<br>IGF2BP1,<br>IGF2BP2                                                           | 1020 | 7 | 16792 | 7.055<br>462 | 1 | 0.948495 | 69.5<br>4649 |

|                      |                                                          |   |                  |              |                                                              |      |    |       |              |   |          |              |
|----------------------|----------------------------------------------------------|---|------------------|--------------|--------------------------------------------------------------|------|----|-------|--------------|---|----------|--------------|
|                      | proc<br>ess                                              |   |                  |              |                                                              |      |    |       |              |   |          |              |
| GOTERM_B<br>P_DIRECT | G0:0<br>0311<br>00~o<br>rgan<br>rege<br>nera<br>tion     | 7 | 0.5<br>728<br>31 | 0.063<br>366 | PKM, CDK1,<br>BAK1,<br>NOTCH1,<br>MKI67,<br>PTPRU,<br>CCNA2  | 1020 | 47 | 16792 | 2.451<br>898 | 1 | 0.947351 | 69.7<br>5669 |
| GOTERM_B<br>P_DIRECT | G0:0<br>0100<br>43~r<br>espo<br>nse<br>to<br>zinc<br>ion | 6 | 0.4<br>909<br>98 | 0.064<br>532 | S100A8,<br>ASS1, TH,<br>GGH,<br>SLC30A3,<br>ABCC8            | 1020 | 36 | 16792 | 2.743<br>791 | 1 | 0.94824  | 70.4<br>3677 |
| GOTERM_B<br>P_DIRECT | G0:0<br>0094<br>09~r<br>espo<br>nse<br>to<br>cold        | 6 | 0.4<br>909<br>98 | 0.064<br>532 | SLC27A1,<br>ZNF516,<br>HSP90AA1,<br>CIRBP,<br>PCSK1N,<br>VGF | 1020 | 36 | 16792 | 2.743<br>791 | 1 | 0.94824  | 70.4<br>3677 |
| GOTERM_B<br>P_DIRECT | G0:0<br>0714                                             | 8 | 0.6<br>546       | 0.065<br>145 | KLF5,<br>CCNB1,                                              | 1020 | 59 | 16792 | 2.232<br>237 | 1 | 0.94776  | 70.7<br>8865 |

|                      |                                                                                                      |   |                  |              |                                                    |      |    |       |              |   |         |              |
|----------------------|------------------------------------------------------------------------------------------------------|---|------------------|--------------|----------------------------------------------------|------|----|-------|--------------|---|---------|--------------|
|                      | 07~c<br>ellu<br>lar<br>resp<br>onse<br>to<br>orga<br>nic<br>cycl<br>ic<br>comp<br>ound               |   | 64               |              | P2RY6,<br>CASP3,<br>RGS20,<br>CEBPB,<br>RAE1, BTRC |      |    |       |              |   |         |              |
| GOTERM_B<br>P_DIRECT | G0:0<br>0518<br>95~n<br>egat<br>ive<br>regu<br>lati<br>on<br>of<br>foca<br>l<br>adhe<br>sion<br>asse | 4 | 0.3<br>273<br>32 | 0.069<br>053 | COR01C,<br>RCC2,<br>CLASP2,<br>SRC                 | 1020 | 16 | 16792 | 4.115<br>686 | 1 | 0.95476 | 72.9<br>4074 |

|                      |                                                                                                                                         |   |                  |              |                                    |      |    |       |              |   |         |              |
|----------------------|-----------------------------------------------------------------------------------------------------------------------------------------|---|------------------|--------------|------------------------------------|------|----|-------|--------------|---|---------|--------------|
|                      | mbly                                                                                                                                    |   |                  |              |                                    |      |    |       |              |   |         |              |
| GOTERM_B<br>P_DIRECT | G0:2<br>0001<br>79~p<br>osit<br>ive<br>regu<br>lati<br>on<br>of<br>neur<br>al<br>prec<br>urso<br>r<br>cell<br>prol<br>ifer<br>atio<br>n | 4 | 0.3<br>273<br>32 | 0.069<br>053 | FZD9,<br>CDON,<br>WNT3A,<br>ADGRG1 | 1020 | 16 | 16792 | 4.115<br>686 | 1 | 0.95476 | 72.9<br>4074 |
| GOTERM_B<br>P_DIRECT | G0:0<br>0507<br>68~n<br>egat<br>ive<br>regu                                                                                             | 4 | 0.3<br>273<br>32 | 0.069<br>053 | NOTCH1,<br>WNT3A,<br>DLL3, PCMI    | 1020 | 16 | 16792 | 4.115<br>686 | 1 | 0.95476 | 72.9<br>4074 |

|                      |                                                                          |   |                  |              |                                                    |      |    |       |              |   |          |              |
|----------------------|--------------------------------------------------------------------------|---|------------------|--------------|----------------------------------------------------|------|----|-------|--------------|---|----------|--------------|
|                      | lation<br>of<br>neur<br>ogen<br>esis                                     |   |                  |              |                                                    |      |    |       |              |   |          |              |
| GOTERM_B<br>P_DIRECT | G0:0<br>0427<br>55~e<br>atin<br>g<br>beha<br>vior                        | 5 | 0.4<br>091<br>65 | 0.069<br>533 | CCK,<br>OPRK1, TH,<br>BBS12, NMU                   | 1020 | 26 | 16792 | 3.165<br>913 | 1 | 0.954001 | 73.1<br>9464 |
| GOTERM_B<br>P_DIRECT | G0:0<br>0068<br>36~n<br>euro<br>trans<br>mit<br>ter<br>tran<br>spor<br>t | 5 | 0.4<br>091<br>65 | 0.069<br>533 | ICA1,<br>CPLX1,<br>SLC6A11,<br>SLC6A17,<br>SLC6A19 | 1020 | 26 | 16792 | 3.165<br>913 | 1 | 0.954001 | 73.1<br>9464 |
| GOTERM_B<br>P_DIRECT | G0:0<br>0162<br>66~0                                                     | 8 | 0.6<br>546<br>64 | 0.070<br>078 | GALNT3,<br>MUC21,<br>B3GNT4,                       | 1020 | 60 | 16792 | 2.195<br>033 | 1 | 0.953386 | 73.4<br>8024 |

|                  |                                                |   |          |          |                                                          |      |    |       |          |   |          |          |
|------------------|------------------------------------------------|---|----------|----------|----------------------------------------------------------|------|----|-------|----------|---|----------|----------|
|                  | -glycan processing                             |   |          |          | B3GNT7, B3GNT3, MUC5B, B4GALT5, MUC16                    |      |    |       |          |   |          |          |
| GOTERM_BP_DIRECT | GO:0014707~response to organic cyclic compound | 7 | 0.572831 | 0.074661 | CDK1, BAK1, G6PD, BTG2, MKI67, PSMB2, ABCD3              | 1020 | 49 | 16792 | 2.351821 | 1 | 0.960617 | 75.76902 |
| GOTERM_BP_DIRECT | GO:001889~liver development                    | 9 | 0.736498 | 0.078912 | PKM, NOTCH1, ASS1, XBP1, CEBPG, PTCD2, QDPR, SRD5A1, LSR | 1020 | 74 | 16792 | 2.002226 | 1 | 0.966124 | 77.72378 |

|                      |                                                                                                              |   |                  |              |                               |      |    |       |              |   |          |              |
|----------------------|--------------------------------------------------------------------------------------------------------------|---|------------------|--------------|-------------------------------|------|----|-------|--------------|---|----------|--------------|
| GOTERM_B<br>P_DIRECT | G0:2<br>0008<br>11~n<br>egat<br>ive<br>regu<br>lati<br>on<br>of<br>anoi<br>kis                               | 4 | 0.3<br>273<br>32 | 0.080<br>208 | NOTCH1,<br>BCL2,<br>TLE1, SRC | 1020 | 17 | 16792 | 3.873<br>587 | 1 | 0.966695 | 78.2<br>895  |
| GOTERM_B<br>P_DIRECT | G0:1<br>9048<br>71~p<br>osit<br>ive<br>regu<br>lati<br>on<br>of<br>prot<br>ein<br>loca<br>liza<br>tion<br>to | 3 | 0.2<br>454<br>99 | 0.080<br>712 | CCT5,<br>TCP1,<br>CCT6A       | 1020 | 8  | 16792 | 6.173<br>529 | 1 | 0.96609  | 78.5<br>0571 |

|                      |                                                                                                   |   |                  |              |                          |      |   |       |              |   |         |              |
|----------------------|---------------------------------------------------------------------------------------------------|---|------------------|--------------|--------------------------|------|---|-------|--------------|---|---------|--------------|
|                      | Caja<br>l<br>body                                                                                 |   |                  |              |                          |      |   |       |              |   |         |              |
| GOTERM_B<br>P_DIRECT | G0:0<br>0000<br>76~D<br>NA<br>repl<br>icat<br>ion<br>chec<br>kpoi<br>nt                           | 3 | 0.2<br>454<br>99 | 0.080<br>712 | CDC45,<br>RAD17,<br>CDT1 | 1020 | 8 | 16792 | 6.173<br>529 | 1 | 0.96609 | 78.5<br>0571 |
| GOTERM_B<br>P_DIRECT | G0:0<br>0434<br>97~r<br>egul<br>atio<br>n of<br>prot<br>ein<br>hete<br>rodi<br>meri<br>zati<br>on | 3 | 0.2<br>454<br>99 | 0.080<br>712 | BAK1,<br>CDON, BCL2      | 1020 | 8 | 16792 | 6.173<br>529 | 1 | 0.96609 | 78.5<br>0571 |

|                      |                                                                                                    |   |                  |              |                         |      |   |       |              |   |         |              |
|----------------------|----------------------------------------------------------------------------------------------------|---|------------------|--------------|-------------------------|------|---|-------|--------------|---|---------|--------------|
|                      | acti<br>vity                                                                                       |   |                  |              |                         |      |   |       |              |   |         |              |
| GOTERM_B<br>P_DIRECT | GO:0<br>0602<br>36~r<br>egul<br>atio<br>n of<br>mito<br>tic<br>spin<br>dle<br>orga<br>niza<br>tion | 3 | 0.2<br>454<br>99 | 0.080<br>712 | BORA,<br>TPX2,<br>PARP3 | 1020 | 8 | 16792 | 6.173<br>529 | 1 | 0.96609 | 78.5<br>0571 |
| GOTERM_B<br>P_DIRECT | GO:0<br>0331<br>46~r<br>egul<br>atio<br>n of<br>intr<br>acel<br>lula<br>r<br>estr                  | 3 | 0.2<br>454<br>99 | 0.080<br>712 | UFSP2,<br>CARM1, SRC    | 1020 | 8 | 16792 | 6.173<br>529 | 1 | 0.96609 | 78.5<br>0571 |

|                      |                                                                                     |    |                  |              |                            |      |     |       |              |   |          |              |
|----------------------|-------------------------------------------------------------------------------------|----|------------------|--------------|----------------------------|------|-----|-------|--------------|---|----------|--------------|
|                      | ogen<br>rece<br>ptor<br>sign<br>alin<br>g<br>path<br>way                            |    |                  |              |                            |      |     |       |              |   |          |              |
| GOTERM_B<br>P_DIRECT | G0:0<br>0450<br>56~t<br>rans<br>cyto<br>sis                                         | 3  | 0.2<br>454<br>99 | 0.080<br>712 | RAB17,<br>VPS35, SRC       | 1020 | 8   | 16792 | 6.173<br>529 | 1 | 0.96609  | 78.5<br>0571 |
| GOTERM_B<br>P_DIRECT | G0:0<br>0507<br>73~r<br>egul<br>atio<br>n of<br>dend<br>rite<br>deve<br>lop<br>ment | 3  | 0.2<br>454<br>99 | 0.080<br>712 | RAB17,<br>CDC20,<br>CAMK1D | 1020 | 8   | 16792 | 6.173<br>529 | 1 | 0.96609  | 78.5<br>0571 |
| GOTERM_B             | G0:0                                                                                | 15 | 1.2              | 0.081        | CDK1,                      | 1020 | 153 | 16792 | 1.613        | 1 | 0.965995 | 78.8         |

|                      |                                                                                                                                                                          |   |                  |              |                                                                                                                                        |      |    |       |             |   |          |            |
|----------------------|--------------------------------------------------------------------------------------------------------------------------------------------------------------------------|---|------------------|--------------|----------------------------------------------------------------------------------------------------------------------------------------|------|----|-------|-------------|---|----------|------------|
| P_DIRECT             | 0427<br>87~p<br>rote<br>in<br>ubiq<br>uiti<br>nati<br>on<br>invo<br>lved<br>in<br>ubiq<br>uiti<br>n-de<br>pend<br>ent<br>prot<br>ein<br>cata<br>boli<br>c<br>proc<br>ess |   | 274<br>96        | 557          | ABTB2,<br>CDC20,<br>GAN,<br>AURKA,<br>AURKB,<br>UBE2C,<br>CCNB1,<br>UHRF1,<br>PLK1,<br>NEDD4L,<br>SMURF1,<br>SIAH2,<br>SPOP,<br>KLHL32 |      |    |       | 995         |   |          | 6376       |
| GOTERM_B<br>P_DIRECT | GO:0<br>0000<br>79~r                                                                                                                                                     | 6 | 0.4<br>909<br>98 | 0.085<br>157 | CCNE2,<br>GTPBP4,<br>PKMYT1,                                                                                                           | 1020 | 39 | 16792 | 2.532<br>73 | 1 | 0.969702 | 80.3<br>27 |

|                  |                                                                        |    |          |          |                                                                      |      |     |       |          |   |          |          |
|------------------|------------------------------------------------------------------------|----|----------|----------|----------------------------------------------------------------------|------|-----|-------|----------|---|----------|----------|
|                  | egulation of cyclin-dependent protein serine/threonine kinase activity |    |          |          | CCNG1, CCNA2, CDC25A                                                 |      |     |       |          |   |          |          |
| GOTERM_BP_DIRECT | G0:0016337~singl e organ ismal cell                                    | 11 | 0.900164 | 0.085867 | MPZL2, PKP1, COL13A1, NECTIN1, CYFIP2, CDH1, PTPRU, CD24, CDH3, SRC, | 1020 | 101 | 16792 | 1.792972 | 1 | 0.969411 | 80.60428 |

|                  |                                                      |   |          |        |                                   |      |    |       |          |   |          |          |
|------------------|------------------------------------------------------|---|----------|--------|-----------------------------------|------|----|-------|----------|---|----------|----------|
|                  | -cell adhesion                                       |   |          |        | NPHP1                             |      |    |       |          |   |          |          |
| GOTERM_BP_DIRECT | G0:0045931~positive regulation of mitotic cell cycle | 5 | 0.409165 | 0.0867 | CCNB1, CDK1, FGF10, BIRC5, CDC25B | 1020 | 28 | 16792 | 2.939776 | 1 | 0.969283 | 80.92452 |
| GOTERM_BP_DIRECT | G0:0009314~response to radiation                     | 5 | 0.409165 | 0.0867 | F11R, OPRK1, BCL2, TXN, CDC25A    | 1020 | 28 | 16792 | 2.939776 | 1 | 0.969283 | 80.92452 |

|                      |                                                 |    |          |          |                                                                                                                 |      |     |       |          |   |          |          |
|----------------------|-------------------------------------------------|----|----------|----------|-----------------------------------------------------------------------------------------------------------------|------|-----|-------|----------|---|----------|----------|
|                      | n                                               |    |          |          |                                                                                                                 |      |     |       |          |   |          |          |
| GOTERM_B<br>P_DIRECT | GO:0018146~keratan sulfate biosynthetic process | 5  | 0.409165 | 0.0867   | B4GAT1,<br>B3GNT4,<br>B3GNT7,<br>B3GNT3,<br>B4GALT5                                                             | 1020 | 28  | 16792 | 2.939776 | 1 | 0.969283 | 80.92452 |
| GOTERM_B<br>P_DIRECT | GO:0007219~Notch signaling pathway              | 12 | 0.981997 | 0.089621 | NOTCH1,<br>CHAC1,<br>DTX2,<br>DNER,<br>DTX3,<br>APH1B,<br>DLL3,<br>MAML3,<br>PERP,<br>MESP1,<br>MESP2,<br>ANXA4 | 1020 | 115 | 16792 | 1.717852 | 1 | 0.971728 | 82.00864 |
| GOTERM_B             | GO:0                                            | 8  | 0.6      | 0.091    | AMER1,                                                                                                          | 1020 | 64  | 16792 | 2.057    | 1 | 0.973322 | 82.8     |

|                      |                                                                                                      |   |                  |              |                                                                       |      |    |       |              |   |          |              |
|----------------------|------------------------------------------------------------------------------------------------------|---|------------------|--------------|-----------------------------------------------------------------------|------|----|-------|--------------|---|----------|--------------|
| P_DIRECT             | 0313<br>98~p<br>osit<br>ive<br>regu<br>lati<br>on<br>of<br>prot<br>ein<br>ubiq<br>uiti<br>nati<br>on |   | 546<br>64        | 974          | FANCI,<br>NDFIP1,<br>PTTG1IP,<br>TBC1D7,<br>FBX04,<br>CHFR,<br>TSPYL5 |      |    |       | 843          |   |          | 3973         |
| GOTERM_B<br>P_DIRECT | G0:0<br>0307<br>05~c<br>ytos<br>kele<br>ton-<br>depe<br>nden<br>t<br>intr<br>acel<br>lula            | 4 | 0.3<br>273<br>32 | 0.092<br>086 | TUBB,<br>TUBA1B,<br>TUBA1C,<br>KIF13B                                 | 1020 | 18 | 16792 | 3.658<br>388 | 1 | 0.972377 | 82.8<br>7807 |

|                      |                                                                                        |   |                  |              |                                          |      |    |       |              |   |          |              |
|----------------------|----------------------------------------------------------------------------------------|---|------------------|--------------|------------------------------------------|------|----|-------|--------------|---|----------|--------------|
|                      | r<br>tran<br>spor<br>t                                                                 |   |                  |              |                                          |      |    |       |              |   |          |              |
| GOTERM_B<br>P_DIRECT | G0:0<br>0466<br>55~f<br>olic<br>acid<br>meta<br>boli<br>c<br>proc<br>ess               | 4 | 0.3<br>273<br>32 | 0.092<br>086 | MTHFD2,<br>SHMT2,<br>SLC46A1,<br>MTHFD1L | 1020 | 18 | 16792 | 3.658<br>388 | 1 | 0.972377 | 82.8<br>7807 |
| GOTERM_B<br>P_DIRECT | G0:0<br>0715<br>39~p<br>rote<br>in<br>loca<br>liza<br>tion<br>to<br>cent<br>roso<br>me | 4 | 0.3<br>273<br>32 | 0.092<br>086 | STIL,<br>BBS4,<br>AURKA,<br>PCM1         | 1020 | 18 | 16792 | 3.658<br>388 | 1 | 0.972377 | 82.8<br>7807 |

|                      |                                                     |   |          |          |                                                     |      |    |       |          |   |          |          |
|----------------------|-----------------------------------------------------|---|----------|----------|-----------------------------------------------------|------|----|-------|----------|---|----------|----------|
| GOTERM_B<br>P_DIRECT | GO:0045184<br>establishment of protein localization | 6 | 0.490998 | 0.092715 | CORO1C, RCC2, PLK1, DLG4, MCC, CEP55                | 1020 | 40 | 16792 | 2.469412 | 1 | 0.972013 | 83.09373 |
| GOTERM_B<br>P_DIRECT | GO:0006633<br>fatty acid biosynthetic process       | 7 | 0.572831 | 0.093603 | PRKAG3, ELOVL1, XBP1, PRKAB1, ABCD3, FADS6, HSD17B8 | 1020 | 52 | 16792 | 2.216139 | 1 | 0.971944 | 83.39351 |
| GOTERM_B<br>P_DIRECT | GO:0042149<br>cellu                                 | 5 | 0.409165 | 0.095981 | BECN1, XBP1, IMPACT, BCL2,                          | 1020 | 29 | 16792 | 2.838404 | 1 | 0.973496 | 84.17162 |

|                      |                                                                 |   |                  |              |                         |      |   |       |              |   |          |             |
|----------------------|-----------------------------------------------------------------|---|------------------|--------------|-------------------------|------|---|-------|--------------|---|----------|-------------|
|                      | lar<br>resp<br>onse<br>to<br>gluc<br>ose<br>star<br>vati<br>on  |   |                  |              | SLC2A1                  |      |   |       |              |   |          |             |
| GOTERM_B<br>P_DIRECT | G0:0<br>0600<br>68~v<br>agin<br>a<br>deve<br>lopme<br>ent       | 3 | 0.2<br>454<br>99 | 0.099<br>716 | TYRO3,<br>BAK1, ESR1    | 1020 | 9 | 16792 | 5.487<br>582 | 1 | 0.976247 | 85.3<br>245 |
| GOTERM_B<br>P_DIRECT | G0:0<br>0108<br>38~p<br>osit<br>ive<br>regu<br>lati<br>on<br>of | 3 | 0.2<br>454<br>99 | 0.099<br>716 | TGM1,<br>FGF10,<br>CDH3 | 1020 | 9 | 16792 | 5.487<br>582 | 1 | 0.976247 | 85.3<br>245 |

|                      |                                                                                   |   |                  |              |                              |      |   |       |              |   |          |             |
|----------------------|-----------------------------------------------------------------------------------|---|------------------|--------------|------------------------------|------|---|-------|--------------|---|----------|-------------|
|                      | keratino<br>cyte<br>prolifer<br>ation                                             |   |                  |              |                              |      |   |       |              |   |          |             |
| GOTERM_B<br>P_DIRECT | G0:0<br>0158<br>86~h<br>eme<br>transpor<br>t                                      | 3 | 0.2<br>454<br>99 | 0.099<br>716 | SLC46A1,<br>FLVCR2,<br>ABCG2 | 1020 | 9 | 16792 | 5.487<br>582 | 1 | 0.976247 | 85.3<br>245 |
| GOTERM_B<br>P_DIRECT | G0:0<br>0086<br>08~a<br>ttac<br>hmen<br>t of<br>spindle<br>microtub<br>ules<br>to | 3 | 0.2<br>454<br>99 | 0.099<br>716 | SGO1,<br>NDC80,<br>AURKB     | 1020 | 9 | 16792 | 5.487<br>582 | 1 | 0.976247 | 85.3<br>245 |

|                  |                                                    |   |          |          |                        |      |   |       |          |   |          |         |
|------------------|----------------------------------------------------|---|----------|----------|------------------------|------|---|-------|----------|---|----------|---------|
|                  | kinetochore                                        |   |          |          |                        |      |   |       |          |   |          |         |
| GOTERM_BP_DIRECT | G0:000075~cell cycle checkpoint                    | 3 | 0.245499 | 0.099716 | CCNE2, TICRR, CCNG2    | 1020 | 9 | 16792 | 5.487582 | 1 | 0.976247 | 85.3245 |
| GOTERM_BP_DIRECT | G0:0042754~negative regulation of circadian rhythm | 3 | 0.245499 | 0.099716 | CRY2, SUV39H1, SUV39H2 | 1020 | 9 | 16792 | 5.487582 | 1 | 0.976247 | 85.3245 |

c. KEGG

| Category     | Term                | Count | %        | PValue   | Genes                                                                                                                                       | List Total | Pop Hits | Pop Total | Fold Enrichment | Bonferroni | Benjamini | FDR      |
|--------------|---------------------|-------|----------|----------|---------------------------------------------------------------------------------------------------------------------------------------------|------------|----------|-----------|-----------------|------------|-----------|----------|
| KEGG_PATHWAY | hsa04110:Cell cycle | 24    | 1.963993 | 4.53E-07 | E2F2, CDK1, YWHAZ, CCNH, DBF4, SMAD4, PKMYT1, TTK, CDC20, MCM4, CDC25A, CDC25B, MCM6, CCNB1, CCNE2, CCNE1, CDC45, CCNB2, PLK1, BUB1, YWHAQ, | 397        | 124      | 6879      | 3.353701        | 1.19E-04   | 1.19E-04  | 5.93E-04 |

|                  |                                    |    |                  |              |                                                                                                                                                                              |     |     |      |              |          |          |              |
|------------------|------------------------------------|----|------------------|--------------|------------------------------------------------------------------------------------------------------------------------------------------------------------------------------|-----|-----|------|--------------|----------|----------|--------------|
|                  |                                    |    |                  |              | ORC6,<br>ORC1,<br>CCNA2                                                                                                                                                      |     |     |      |              |          |          |              |
| KEGG_PATH<br>WAY | hsa04<br>114:O<br>ocyte<br>meiosis | 18 | 1.4<br>729<br>95 | 1.82E-<br>04 | CDK1,<br>YWHAZ,<br>CPEB2,<br>BTRC,<br>PKMYT1,<br>AURKA,<br>CDC20,<br>ITPR3,<br>ITPR1,<br>CCNB1,<br>CCNE2,<br>CCNE1,<br>CCNB2,<br>SGO1,<br>PLK1,<br>BUB1,<br>YWHAQ,<br>CALML5 | 397 | 111 | 6879 | 2.809<br>858 | 0.046474 | 0.023513 | 0.23<br>7419 |
| KEGG_PATH<br>WAY | hsa04<br>970:S<br>alivary<br>secre | 13 | 1.0<br>638<br>3  | 0.0035<br>53 | CAMP,<br>CST3,<br>ITPR3,<br>ITPR1,<br>ATP2B2,                                                                                                                                | 397 | 86  | 6879 | 2.619<br>267 | 0.606486 | 0.267198 | 4.55<br>1634 |

|                  |                                        |    |                  |              |                                                                                                                                |     |    |      |              |          |          |              |
|------------------|----------------------------------------|----|------------------|--------------|--------------------------------------------------------------------------------------------------------------------------------|-----|----|------|--------------|----------|----------|--------------|
|                  | tion                                   |    |                  |              | KCNN4,<br>PLCB3,<br>CST5,<br>GNAS,<br>TRPV6,<br>CALML5,<br>VAMP2,<br>MUC5B                                                     |     |    |      |              |          |          |              |
| KEGG_PATH<br>WAY | hsa04<br>530:T<br>ight<br>junct<br>ion | 13 | 1.0<br>638<br>3  | 0.0039<br>14 | ACTB,<br>F11R,<br>CLDN7,<br>CLDN9,<br>ACTN4,<br>CLDN4,<br>CLDN3,<br>MYH14,<br>MYL12A,<br>PPP2R2C,<br>CLDN14,<br>SRC,<br>CLDN23 | 397 | 87 | 6879 | 2.589<br>16  | 0.642075 | 0.226522 | 5.00<br>2497 |
| KEGG_PATH<br>WAY | hsa04<br>115:p<br>53<br>signa<br>ling  | 11 | 0.9<br>001<br>64 | 0.0046<br>32 | CCNB1,<br>CCNE2,<br>CCNE1,<br>CDK1,<br>CASP3,                                                                                  | 397 | 67 | 6879 | 2.844<br>806 | 0.703713 | 0.215952 | 5.89<br>5077 |

|              |                                               |    |          |          |                                                                                                                                                |     |     |      |          |          |          |          |
|--------------|-----------------------------------------------|----|----------|----------|------------------------------------------------------------------------------------------------------------------------------------------------|-----|-----|------|----------|----------|----------|----------|
|              | pathway                                       |    |          |          | CCNB2,<br>RRM2,<br>PERP,<br>CCNG1,<br>CCNG2,<br>GTSE1                                                                                          |     |     |      |          |          |          |          |
| KEGG_PATHWAY | hsa04670:Leukocyte transendothelial migration | 14 | 1.145663 | 0.014492 | ACTB,<br>CLDN7,<br>F11R,<br>CLDN9,<br>MYL5,<br>CLDN4,<br>ACTN4,<br>CLDN3,<br>ARHGAP35,<br>MYL12A,<br>CLDN23,<br>CLDN14,<br>RAPGEF4,<br>RAPGEF3 | 397 | 115 | 6879 | 2.109429 | 0.978175 | 0.47136  | 17.39009 |
| KEGG_PATHWAY | hsa04914:Progestin-mediated                   | 11 | 0.900164 | 0.027066 | CCNB1,<br>CDK1,<br>HSP90AA1,<br>CCNB2,<br>CPEB2,<br>PLK1,                                                                                      | 397 | 87  | 6879 | 2.190828 | 0.999245 | 0.641928 | 30.16911 |

|              |                                 |    |          |          |                                                                          |     |    |      |          |          |          |          |
|--------------|---------------------------------|----|----------|----------|--------------------------------------------------------------------------|-----|----|------|----------|----------|----------|----------|
|              | oocyte maturation               |    |          |          | BUB1, PKMYT1, CCNA2, CDC25A, CDC25B                                      |     |    |      |          |          |          |          |
| KEGG_PATHWAY | hsa04540:Gap junction           | 11 | 0.900164 | 0.029036 | CDK1, TUBB, PLCB3, TUBB6, GNAS, ITPR3, TUBA1B, SRC, ITPR1, TUBB3, TUBA1C | 397 | 88 | 6879 | 2.165932 | 0.999556 | 0.619015 | 31.99624 |
| KEGG_PATHWAY | hsa03460:Fanconi anemia pathway | 8  | 0.654664 | 0.031031 | POLK, FAN1, POLI, FANCI, POLN, FANCA, UBE2T, RAD51                       | 397 | 53 | 6879 | 2.615465 | 0.999741 | 0.600545 | 33.80243 |
| KEGG_PATHWAY | hsa04925:A                      | 10 | 0.8183   | 0.042199 | AGTR1, PLCB3,                                                            | 397 | 81 | 6879 | 2.139192 | 0.999988 | 0.67684  | 43.12035 |

|              |                                    |   |          |          |                                                                  |     |    |      |          |          |          |          |
|--------------|------------------------------------|---|----------|----------|------------------------------------------------------------------|-----|----|------|----------|----------|----------|----------|
|              | ldosterone synthesis and secretion |   | 31       |          | CYP21A2, CAMK1, GNAS, CALML5, ITPR3, CACNA1D, ITPR1, CAMK1D      |     |    |      |          |          |          |          |
| KEGG_PATHWAY | hsa00750:Vitamin B6 metabolism     | 3 | 0.245499 | 0.042486 | PDXK, PHOSPHO2, PSAT1                                            | 397 | 6  | 6879 | 8.663728 | 0.999989 | 0.644444 | 43.34358 |
| KEGG_PATHWAY | hsa04520:Adherens junction         | 9 | 0.736498 | 0.050137 | ACTB, CSNK2A2, ACTN4, NECTIN1, SMAD4, CDH1, NECTIN4, SNAIL1, SRC | 397 | 71 | 6879 | 2.196438 | 0.999999 | 0.674712 | 48.98982 |
| KEGG_PATHWAY | hsa01230:Biogenesis                | 9 | 0.736498 | 0.053707 | PKM, SHMT2, BCAT2,                                               | 397 | 72 | 6879 | 2.165932 | 0.999999 | 0.671284 | 51.44306 |

|                  |                                                                                   |    |                  |              |                                                                                                      |     |    |      |              |   |          |              |
|------------------|-----------------------------------------------------------------------------------|----|------------------|--------------|------------------------------------------------------------------------------------------------------|-----|----|------|--------------|---|----------|--------------|
|                  | thesi<br>s of<br>amino<br>acids                                                   |    |                  |              | ASS1,<br>PFKP,<br>PSAT1,<br>PSPH,<br>PGK1,<br>GPT2                                                   |     |    |      |              |   |          |              |
| KEGG_PATH<br>WAY | hsa04<br>911:I<br>nsuli<br>n<br>secre<br>tion                                     | 10 | 0.8<br>183<br>31 | 0.0546<br>12 | KCNN4,<br>PLCB3,<br>SLC2A1,<br>RAPGEF4,<br>GNAS,<br>VAMP2,<br>ITPR3,<br>ABCC8,<br>CACNA1D,<br>KCNJ11 | 397 | 85 | 6879 | 2.038<br>524 | 1 | 0.650411 | 52.0<br>4723 |
| KEGG_PATH<br>WAY | hsa00<br>601:G<br>lycos<br>phing<br>olipi<br>d<br>biosy<br>nthes<br>is -<br>lacto | 5  | 0.4<br>091<br>65 | 0.0592<br>5  | B4GAT1,<br>B3GNT4,<br>FUT6,<br>FUT3,<br>B3GNT3                                                       | 397 | 26 | 6879 | 3.332<br>203 | 1 | 0.655902 | 55.0<br>3617 |

|                  |                                                                              |    |                  |              |                                                                           |     |     |      |              |   |          |              |
|------------------|------------------------------------------------------------------------------|----|------------------|--------------|---------------------------------------------------------------------------|-----|-----|------|--------------|---|----------|--------------|
|                  | and<br>neola<br>cto<br>serie<br>s                                            |    |                  |              |                                                                           |     |     |      |              |   |          |              |
| KEGG_PATH<br>WAY | hsa05<br>130:P<br>athog<br>enic<br>Esche<br>richi<br>a coli<br>infec<br>tion | 7  | 0.5<br>728<br>31 | 0.0709<br>3  | ACTB,<br>TUBB,<br>TUBB6,<br>CDH1,<br>TUBA1B,<br>TUBB3,<br>TUBA1C          | 397 | 51  | 6879 | 2.378<br>278 | 1 | 0.700225 | 61.8<br>1788 |
| KEGG_PATH<br>WAY | hsa00<br>310:L<br>ysine<br>degra<br>dation                                   | 7  | 0.5<br>728<br>31 | 0.0764<br>93 | AADAT,<br>PLOD1,<br>SUV39H1,<br>ACAT2,<br>COLGALT1,<br>PHYKPL,<br>SUV39H2 | 397 | 52  | 6879 | 2.332<br>542 | 1 | 0.70666  | 64.7<br>0415 |
| KEGG_PATH<br>WAY | hsa04<br>261:A<br>drene<br>rgic<br>signa                                     | 13 | 1.0<br>638<br>3  | 0.0993<br>23 | TPM4,<br>TPM3,<br>TNNT2,<br>AGTR1,<br>ATP2B2,                             | 397 | 138 | 6879 | 1.632<br>297 | 1 | 0.781864 | 74.5<br>6356 |

|                  |                                              |   |                  |              |                                                                                    |     |    |      |              |   |          |              |
|------------------|----------------------------------------------|---|------------------|--------------|------------------------------------------------------------------------------------|-----|----|------|--------------|---|----------|--------------|
|                  | ling<br>in<br>cardi<br>omyoc<br>ytes         |   |                  |              | PLCB3,<br>BCL2,<br>GNAS,<br>RAPGEF4,<br>CALML5,<br>RAPGEF3,<br>CACNA1D,<br>PPP2R2C |     |    |      |              |   |          |              |
| KEGG_PATH<br>WAY | hsa04<br>710:C<br>ircad<br>ian<br>rhyth<br>m | 5 | 0.4<br>091<br>65 | 0.0999<br>51 | PRKAG3,<br>CRY2,<br>BTRC,<br>PRKAB1,<br>BHLHE40                                    | 397 | 31 | 6879 | 2.794<br>751 | 1 | 0.765924 | 74.7<br>9452 |
