# Supplementary material for: LncRNA TINCR favors tumorigenesis via STAT3–TINCR–EGFR-feedback loop by recruiting DNMT1 and acting as a competing endogenous RNA in human breast cancer
Source: Springer Nature journal article supplement (doi:10.1038/s41419-020-03188-0), 2021-01-14
Supplement: MOESM11 [file 41419_2020_3188_MOESM11_ESM.pdf]

a.EGFR

| sample  | log10    | EGFR score |
|---------|----------|------------|
| 1319425 | 4.235336 | 8          |
| 1331476 | 4.188858 | 2          |
| 1422760 | 4.160707 | 8          |
| 1006332 | 4.106602 | 12         |
| 1113530 | 4.01452  | 3          |
| 1101010 | 4.012318 | 12         |
| 1411157 | 3.752647 | 6          |
| 1114897 | 3.712677 | 12         |
| 1402764 | 3.619948 | 4          |
| 1304866 | 3.609275 | 9          |
| 1334997 | 3.575331 | 1          |
| 1305400 | 3.418161 | 2          |
| 1111801 | 3.375327 | 8          |
| 1222763 | 3.229772 | 2          |
| 1413331 | 3.22791  | 6          |
| 1231366 | 3.147992 | 4          |
| 1010941 | 3.106809 | 6          |
| 1319857 | 3.100735 | 1          |
| 1331865 | 3.080815 | 6          |
| 1231086 | 3.053581 | 12         |
| 1229029 | 2.984331 | 0          |
| 1100998 | 2.964912 | 4          |
| 1224273 | 2.944464 | 2          |
| 1114912 | 2.944085 | 4          |
| 1414861 | 2.940908 | 6          |
| 1319895 | 2.909496 | 6          |
| 1014369 | 2.812029 | 12         |
| 1322979 | 2.715006 | 12         |
| 1302137 | 2.714629 | 0          |
| 1305920 | 2.696829 | 8          |
| 1324261 | 2.680333 | 0          |
| 1221498 | 2.678212 | 0          |
| 1221872 | 2.665233 | 8          |
| 1333208 | 2.662272 | 1          |
| 1321489 | 2.654116 | 8          |
| 1317374 | 2.649349 | 0          |
| 1324120 | 2.627135 | 0          |
| 1330963 | 2.623596 | 0          |
| 1222512 | 2.556238 | 6          |
| 1005573 | 2.54667  | 3          |

|         |           |    |
|---------|-----------|----|
| 1010193 | 2. 528288 | 12 |
| 1104421 | 2. 375029 | 12 |
| 1222712 | 2. 370355 | 3  |
| 1417455 | 2. 3661   | 6  |
| 1223843 | 2. 36087  | 0  |
| 1302537 | 2. 344287 | 2  |
| 1228588 | 2. 342565 | 0  |
| 1228435 | 2. 342565 | 4  |
| 1312297 | 2. 320961 | 2  |
| 1225842 | 2. 31667  | 4  |
| 1221806 | 2. 300805 | 4  |
| 1223730 | 2. 296636 | 0  |
| 1221524 | 2. 288681 | 3  |
| 1318194 | 2. 260621 | 0  |
| 1309689 | 2. 260546 | 0  |
| 1309275 | 2. 258356 | 9  |
| 1302604 | 2. 25264  | 1  |
| 1414094 | 2. 246231 | 4  |
| 1229998 | 2. 228796 | 0  |
| 1228142 | 2. 207883 | 4  |
| 1224951 | 2. 204038 | 2  |
| 1317173 | 2. 172913 | 0  |
| 1334965 | 2. 168213 | 0  |
| 1335910 | 2. 160279 | 2  |
| 1316236 | 2. 125018 | 0  |
| 1104967 | 2. 114797 | 4  |
| 1005270 | 2. 106705 | 6  |
| 1319091 | 2. 045553 | 0  |
| 1108722 | 2. 026182 | 4  |
| 1310933 | 1. 990687 | 1  |
| 1419416 | 1. 968707 | 0  |
| 1318108 | 1. 943468 | 3  |
| 1403387 | 1. 934773 | 6  |
| 1310072 | 1. 934773 | 2  |
| 1103528 | 1. 918897 | 0  |
| 1005339 | 1. 918398 | 9  |
| 1223850 | 1. 888242 | 1  |
| 1310062 | 1. 883188 | 2  |
| 1303779 | 1. 856002 | 0  |
| 1223558 | 1. 826592 | 2  |
| 1317357 | 1. 793502 | 0  |
| 1308315 | 1. 758147 | 6  |
| 1304437 | 1. 73311  | 0  |

|         |           |   |
|---------|-----------|---|
| 1221890 | 1. 730224 | 8 |
| 1013279 | 1. 711659 | 2 |
| 1304713 | 1. 702653 | 2 |
| 1305566 | 1. 681781 | 0 |
| 1006634 | 1. 669088 | 2 |
| 1227317 | 1. 624651 | 0 |
| 1303717 | 1. 576485 | 0 |
| 1223842 | 1. 560643 | 2 |
| 1406585 | 1. 529653 | 2 |
| 1405667 | 1. 529653 | 9 |
| 1333641 | 1. 508583 | 0 |
| 1324768 | 1. 456733 | 0 |
| 1223846 | 1. 426417 | 0 |
| 1317784 | 1. 403181 | 4 |
| 1026118 | 1. 398392 | 2 |
| 1222885 | 1. 353575 | 8 |
| 1006235 | 1. 348889 | 3 |
| 1111087 | 1. 286628 | 6 |
| 1112341 | 1. 259024 | 6 |
| 1325379 | 1. 189616 | 2 |
| 1013941 | 1. 188413 | 6 |
| 1100942 | 1. 16274  | 0 |
| 1012927 | 1. 062311 | 6 |
| 1226813 | 1. 056301 | 8 |
| 1221805 | 0. 989328 | 2 |
| 1307793 | 0. 98852  | 1 |
| 1401862 | 0. 927407 | 0 |
| 1408382 | 0. 747242 | 4 |
| 1305613 | 0. 682654 | 6 |
| 1225541 | 0. 619174 | 0 |
| 1104887 | 0. 566315 | 0 |
| 1417729 | 0. 474064 | 4 |
| 1413933 | 0. 427118 | 0 |
| 1026143 | 0. 345171 | 6 |
| 1322103 | 0. 112424 | 0 |
| 1221887 | -0. 59892 | 0 |
| 1322864 | -3. 19005 | 0 |

b.TINCR-EGFR

|            |      | TINCR           |                | X <sup>2</sup> | P      |
|------------|------|-----------------|----------------|----------------|--------|
|            |      | High expression | Low expression |                |        |
| EGFR Score | High | 24              | 14             | 3.8511         | 0.0497 |
|            | Low  | 36              | 46             |                |        |

c.JAK2

| sample  | log10       | JAK2 score |
|---------|-------------|------------|
| 1318160 | 5.595403589 | 2          |
| 1224420 | 5.000413277 | 12         |
| 1312896 | 4.29591651  | 1          |
| 1111264 | 4.261224585 | 12         |
| 1319425 | 4.235335558 | 6          |
| 1101010 | 4.012317501 | 12         |
| 1321034 | 3.952746179 | 3          |
| 1319366 | 3.758115251 | 4          |
| 1223387 | 3.360331755 | 12         |
| 1413183 | 3.359757481 | 2          |
| 1106031 | 3.309891271 | 2          |
| 1305917 | 3.202670269 | 8          |
| 1331865 | 3.080815037 | 2          |
| 1224273 | 2.944464202 | 1          |
| 1221830 | 2.870013685 | 2          |
| 1314381 | 2.83915726  | 2          |
| 1222911 | 2.808282399 | 2          |
| 1336548 | 2.766424542 | 1          |
| 1323700 | 2.747425115 | 1          |
| 1221498 | 2.67821228  | 1          |
| 1221872 | 2.665233008 | 4          |
| 1333208 | 2.662271963 | 1          |
| 1112424 | 2.445763302 | 12         |
| 1224287 | 2.409028105 | 1          |
| 1310923 | 2.390770782 | 2          |
| 1104421 | 2.375028553 | 9          |
| 1222712 | 2.370355261 | 3          |
| 1228588 | 2.34256537  | 1          |

|         |             |   |
|---------|-------------|---|
| 1228435 | 2.34256537  | 4 |
| 1221806 | 2.300804907 | 2 |
| 1221524 | 2.28868084  | 2 |
| 1420952 | 2.19749729  | 2 |
| 1104967 | 2.114797017 | 3 |
| 1108722 | 2.02618191  | 2 |
| 1310933 | 1.99068704  | 1 |
| 1419416 | 1.968706812 | 3 |
| 1403387 | 1.934773213 | 3 |
| 1223850 | 1.888242333 | 1 |
| 1310062 | 1.883188097 | 3 |
| 1317357 | 1.793501864 | 2 |
| 1221890 | 1.730224239 | 2 |
| 1013279 | 1.71165851  | 4 |
| 1406585 | 1.5296534   | 2 |
| 1405667 | 1.5296534   | 1 |
| 1026118 | 1.398392048 | 2 |
| 1222885 | 1.353574785 | 1 |
| 1111087 | 1.286627899 | 6 |
| 1112341 | 1.259024028 | 2 |
| 1232875 | 1.228348898 | 3 |
| 1226813 | 1.05630122  | 4 |
| 1408382 | 0.747241783 | 6 |
| 1026143 | 0.345171213 | 2 |
