# Supplementary material for: LncRNA TINCR favors tumorigenesis via STAT3–TINCR–EGFR-feedback loop by recruiting DNMT1 and acting as a competing endogenous RNA in human breast cancer
Source: Springer Nature journal article supplement (doi:10.1038/s41419-020-03188-0), 2021-01-14
Supplement: MOESM12 [file 41419_2020_3188_MOESM12_ESM-1.pdf]

a. TargetScan

| miRNA             | Position in the UTR | seed match | context++ score | context++ score percentile | weighted context++ score | conserved branch length | Pct  |
|-------------------|---------------------|------------|-----------------|----------------------------|--------------------------|-------------------------|------|
| Conserved sites   |                     |            |                 |                            |                          |                         |      |
| hsa-miR-133a-3p.2 | 50-56               | 7mer-m8    | -0.07           | 60                         | -0.07                    | 3.39                    | 0.57 |
| hsa-miR-133b      | 50-56               | 7mer-m8    | -0.07           | 60                         | -0.07                    | 3.39                    | 0.57 |
| hsa-miR-875-5p    | 270-277             | 8mer       | -0.2            | 91                         | -0.2                     | 2.267                   | N/A  |
| hsa-miR-7-5p      | 457-464             | 8mer       | -0.08           | 80                         | -0.08                    | 2.831                   | 0.19 |
| hsa-miR-138-5p    | 3765-3772           | 8mer       | -0.12           | 69                         | -0.11                    | 2.142                   | 0.16 |
| hsa-miR-222-3p    | 4161-4168           | 8mer       | -0.14           | 76                         | -0.12                    | 3.613                   | 0.52 |
| hsa-miR-221-3p    | 4161-4168           | 8mer       | -0.13           | 75                         | -0.11                    | 3.613                   | 0.52 |
| hsa-miR-152-3p    | 4166-4172           | 7mer-1A    | -0.24           | 90                         | -0.2                     | 4.132                   | 0.55 |
| hsa-miR-148b-3p   | 4166-4172           | 7mer-1A    | -0.24           | 90                         | -0.2                     | 4.132                   | 0.55 |
| hsa-miR-148a-3p   | 4166-4172           | 7mer-1A    | -0.24           | 90                         | -0.2                     | 4.132                   | 0.55 |
| hsa-miR-411-5p.2  | 4206-4213           | 8mer       | -0.03           | 32                         | -0.03                    | 2.613                   | N/A  |
| hsa-miR-455-3p.2  | 4238-4245           | 8mer       | -0.09           | 86                         | -0.08                    | 1.846                   | <    |

|                       |           |         |       |    |       |       |          |
|-----------------------|-----------|---------|-------|----|-------|-------|----------|
|                       |           |         |       |    |       |       | 0.1      |
| hsa-miR-137           | 4563-4570 | 8mer    | -0.03 | 38 | -0.03 | 2.254 | <<br>0.1 |
| hsa-miR-302b-3p       | 4574-4580 | 7mer-m8 | -0.14 | 87 | -0.12 | 2.957 | 0.1<br>7 |
| hsa-miR-302e          | 4574-4580 | 7mer-m8 | -0.14 | 87 | -0.12 | 2.957 | 0.1<br>7 |
| hsa-miR-302a-3p       | 4574-4580 | 7mer-m8 | -0.14 | 87 | -0.12 | 2.957 | 0.1<br>7 |
| hsa-miR-302d-3p       | 4574-4580 | 7mer-m8 | -0.14 | 87 | -0.12 | 2.957 | 0.1<br>7 |
| hsa-miR-302c-3p.<br>1 | 4574-4580 | 7mer-m8 | -0.14 | 87 | -0.12 | 2.957 | 0.1<br>7 |
| hsa-miR-520d-3p       | 4574-4580 | 7mer-m8 | -0.11 | 83 | -0.09 | 2.957 | 0.1<br>7 |
| hsa-miR-520a-3p       | 4574-4580 | 7mer-m8 | -0.11 | 83 | -0.09 | 2.957 | 0.1<br>7 |
| hsa-miR-372-3p        | 4574-4580 | 7mer-m8 | -0.11 | 82 | -0.09 | 2.957 | 0.1<br>7 |
| hsa-miR-520b          | 4574-4580 | 7mer-m8 | -0.11 | 82 | -0.09 | 2.957 | 0.1<br>7 |
| hsa-miR-520c-3p       | 4574-4580 | 7mer-m8 | -0.11 | 82 | -0.09 | 2.957 | 0.1<br>7 |
| hsa-miR-520e          | 4574-4580 | 7mer-m8 | -0.1  | 82 | -0.08 | 2.957 | 0.1<br>7 |
| hsa-miR-373-3p        | 4574-4580 | 7mer-m8 | -0.05 | 80 | -0.04 | 2.957 | 0.1      |

|                  |           |         |       |    |       |       |          |
|------------------|-----------|---------|-------|----|-------|-------|----------|
|                  |           |         |       |    |       |       | 7        |
| hsa-miR-106b-5p  | 4575-4581 | 7mer-m8 | -0.05 | 82 | -0.04 | 3.005 | <<br>0.1 |
| hsa-miR-20a-5p   | 4575-4581 | 7mer-m8 | -0.05 | 81 | -0.04 | 3.005 | <<br>0.1 |
| hsa-miR-93-5p    | 4575-4581 | 7mer-m8 | -0.03 | 80 | -0.03 | 3.005 | <<br>0.1 |
| hsa-miR-20b-5p   | 4575-4581 | 7mer-m8 | -0.03 | 79 | -0.03 | 3.005 | <<br>0.1 |
| hsa-miR-17-5p    | 4575-4581 | 7mer-m8 | -0.03 | 78 | -0.03 | 3.005 | <<br>0.1 |
| hsa-miR-106a-5p  | 4575-4581 | 7mer-m8 | -0.04 | 78 | -0.03 | 3.005 | <<br>0.1 |
| hsa-miR-519d-3p  | 4575-4581 | 7mer-m8 | -0.03 | 78 | -0.03 | 3.005 | <<br>0.1 |
| hsa-miR-526b-3p  | 4575-4581 | 7mer-m8 | -0.02 | 62 | -0.02 | 3.005 | <<br>0.1 |
| hsa-miR-137      | 5756-5763 | 8mer    | -0.03 | 38 | -0.03 | 2.464 | <<br>0.1 |
| hsa-miR-137      | 5784-5790 | 7mer-m8 | -0.14 | 71 | -0.12 | 4.91  | 0.8<br>1 |
| hsa-miR-493-5p   | 5856-5862 | 7mer-1A | -0.08 | 80 | -0.07 | 3.906 | N/A      |
| hsa-miR-144-3p   | 5894-5900 | 7mer-m8 | -0.17 | 91 | -0.15 | 4.7   | 0.9<br>1 |
| hsa-miR-421      | 5897-5903 | 7mer-m8 | -0.11 | 80 | -0.1  | 3.185 | N/A      |
| Poorly conserved |           |         |       |    |       |       |          |

|                       |       |         |       |    |       |       |          |
|-----------------------|-------|---------|-------|----|-------|-------|----------|
| sites                 |       |         |       |    |       |       |          |
| hsa-miR-4437          | 16-22 | 7mer-m8 | -0.24 | 87 | -0.24 | 0     | N/A      |
| hsa-miR-5088-5p       | 17-24 | 8mer    | -0.46 | 99 | -0.46 | 0     | N/A      |
| hsa-miR-3158-3p       | 18-24 | 7mer-1A | -0.14 | 84 | -0.14 | 0     | N/A      |
| hsa-miR-4446-3p       | 18-24 | 7mer-1A | -0.14 | 76 | -0.14 | 0.024 | N/A      |
| hsa-miR-2909          | 19-26 | 8mer    | -0.27 | 96 | -0.27 | 0     | N/A      |
| hsa-miR-1296-5p       | 19-25 | 7mer-1A | -0.17 | 72 | -0.17 | 0.024 | N/A      |
| hsa-miR-1290          | 25-32 | 8mer    | -0.03 | 54 | -0.03 | 0.024 | N/A      |
| hsa-miR-3167          | 26-32 | 7mer-1A | -0.08 | 76 | -0.08 | 0.221 | N/A      |
| hsa-miR-876-5p        | 26-32 | 7mer-1A | -0.01 | 30 | -0.01 | 0.221 | N/A      |
| hsa-miR-378j          | 27-34 | 8mer    | -0.19 | 91 | -0.19 | 0.099 | N/A      |
| hsa-miR-6839-5p       | 27-34 | 8mer    | -0.18 | 90 | -0.18 | 0.099 | N/A      |
| hsa-miR-5706          | 28-34 | 7mer-m8 | -0.15 | 89 | -0.15 | 0     | N/A      |
| hsa-miR-4782-5p       | 28-34 | 7mer-m8 | -0.13 | 86 | -0.13 | 0     | N/A      |
| hsa-miR-5007-5p       | 32-38 | 7mer-m8 | -0.13 | 83 | -0.13 | 0     | N/A      |
| hsa-miR-503-3p        | 43-49 | 7mer-1A | -0.05 | 48 | -0.05 | 0     | N/A      |
| hsa-miR-6861-5p       | 44-50 | 7mer-m8 | -0.02 | 24 | -0.02 | 0     | N/A      |
| hsa-miR-6742-3p       | 45-52 | 8mer    | -0.07 | 77 | -0.07 | 0     | N/A      |
| hsa-miR-6852-5p       | 46-52 | 7mer-1A | -0.06 | 66 | -0.06 | 0.437 | N/A      |
| hsa-miR-939-3p        | 46-52 | 7mer-1A | -0.01 | 37 | -0.01 | 0     | N/A      |
| hsa-miR-1343-3p       | 46-52 | 7mer-m8 | -0.02 | 33 | -0.02 | 0.335 | N/A      |
| hsa-miR-6783-3p       | 46-52 | 7mer-m8 | -0.02 | 32 | -0.02 | 0.335 | N/A      |
| hsa-miR-133a-3p.<br>1 | 50-56 | 7mer-1A | -0.02 | 31 | -0.02 | 3.39  | 0.6<br>8 |
| hsa-miR-4474-3p       | 56-62 | 7mer-m8 | -0.02 | 24 | -0.02 | 0     | N/A      |

|                 |       |               |       |     |       |       |     |
|-----------------|-------|---------------|-------|-----|-------|-------|-----|
| hsa-miR-6893-3p | 61-67 | 7mer-m8       | -0.09 | 68  | -0.09 | 0.145 | N/A |
| hsa-miR-370-3p  | 61-67 | 7mer-m8       | -0.05 | 67  | -0.05 | 0.145 | N/A |
| hsa-miR-492     | 64-70 | 7mer-m8       | -0.09 | 53  | -0.09 | 0.024 | N/A |
| hsa-miR-4751    | 66-72 | 7mer-m8       | -0.15 | 80  | -0.15 | 0     | N/A |
| hsa-miR-7154-3p | 67-74 | 8mer          | -0.12 | 83  | -0.12 | 0     | N/A |
| hsa-miR-766-5p  | 68-74 | 7mer-1A       | -0.11 | 71  | -0.11 | 0     | N/A |
| hsa-miR-6894-5p | 68-74 | 7mer-1A       | -0.03 | 42  | -0.03 | 0     | N/A |
| hsa-miR-765     | 68-74 | 7mer-1A       | -0.04 | 40  | -0.04 | 0.099 | N/A |
| hsa-miR-4802-5p | 69-75 | 7mer-m8       | -0.02 | 34  | -0.02 | 0     | N/A |
| hsa-miR-4534    | 70-76 | 7mer-m8       | -0.02 | 38  | -0.02 | 0     | N/A |
| hsa-miR-8082    | 70-76 | 7mer-m8       | -0.02 | 26  | -0.02 | 0     | N/A |
| hsa-miR-6740-5p | 70-81 | non-canonical | N/A   | N/A | N/A   | 0     | N/A |
| hsa-miR-6740-5p | 70-81 | non-canonical | N/A   | N/A | N/A   | 0     | N/A |
| hsa-miR-6728-5p | 73-80 | 8mer          | -0.09 | 76  | -0.09 | 0     | N/A |
| hsa-miR-5187-5p | 73-79 | 7mer-1A       | -0.12 | 70  | -0.12 | 0     | N/A |
| hsa-miR-6513-5p | 74-80 | 7mer-m8       | -0.02 | 52  | -0.02 | 0     | N/A |
| hsa-miR-769-3p  | 74-80 | 7mer-1A       | -0.01 | 51  | -0.01 | 0.099 | N/A |
| hsa-miR-450b-3p | 74-80 | 7mer-1A       | -0.01 | 47  | -0.01 | 0.099 | N/A |
| hsa-miR-5089-5p | 74-80 | 7mer-1A       | -0.01 | 28  | -0.01 | 0     | N/A |
| hsa-miR-4425    | 75-82 | 8mer          | -0.14 | 65  | -0.14 | 0     | N/A |
| hsa-miR-3147    | 76-82 | 7mer-1A       | -0.07 | 73  | -0.07 | 0     | N/A |
| hsa-miR-4687-3p | 79-86 | 8mer          | -0.11 | 79  | -0.11 | 0     | N/A |
| hsa-miR-7974    | 80-86 | 7mer-1A       | -0.12 | 64  | -0.12 | 0     | N/A |

|                  |         |         |       |    |       |       |          |
|------------------|---------|---------|-------|----|-------|-------|----------|
| hsa-miR-889-5p   | 81-87   | 7mer-m8 | -0.07 | 63 | -0.07 | 0.085 | N/A      |
| hsa-miR-3622b-5p | 84-90   | 7mer-m8 | -0.07 | 56 | -0.07 | 0     | N/A      |
| hsa-miR-4253     | 85-91   | 7mer-m8 | -0.11 | 54 | -0.11 | 0     | N/A      |
| hsa-miR-6862-5p  | 85-91   | 7mer-m8 | -0.09 | 50 | -0.09 | 0     | N/A      |
| hsa-miR-4767     | 88-94   | 7mer-1A | -0.3  | 87 | -0.3  | 0     | N/A      |
| hsa-miR-610      | 95-101  | 7mer-m8 | -0.09 | 54 | -0.09 | 0.024 | N/A      |
| hsa-miR-193a-5p  | 104-110 | 7mer-1A | -0.1  | 73 | -0.1  | 0.338 | <<br>0.1 |
| hsa-miR-6759-5p  | 106-112 | 7mer-m8 | -0.12 | 79 | -0.12 | 0     | N/A      |
| hsa-miR-6793-5p  | 106-112 | 7mer-1A | -0.06 | 52 | -0.06 | 0.335 | N/A      |
| hsa-miR-6748-5p  | 106-112 | 7mer-1A | -0.06 | 38 | -0.06 | 0.335 | N/A      |
| hsa-miR-134-3p   | 107-114 | 8mer    | -0.24 | 94 | -0.24 | 0.085 | N/A      |
| hsa-miR-7114-5p  | 108-114 | 7mer-1A | -0.07 | 64 | -0.07 | 0     | N/A      |
| hsa-miR-622      | 111-117 | 7mer-m8 | -0.06 | 66 | -0.06 | 0.504 | N/A      |
| hsa-miR-548ap-3p | 116-122 | 7mer-m8 | -0.02 | 37 | -0.02 | 0     | N/A      |
| hsa-miR-548t-3p  | 116-122 | 7mer-m8 | -0.02 | 36 | -0.02 | 0     | N/A      |
| hsa-miR-548aa    | 116-122 | 7mer-m8 | -0.02 | 36 | -0.02 | 0     | N/A      |
| hsa-miR-548aw    | 119-126 | 8mer    | -0.03 | 73 | -0.03 | 0     | N/A      |
| hsa-miR-548f-5p  | 119-125 | 7mer-1A | -0.01 | 35 | -0.01 | 0     | N/A      |
| hsa-miR-548g-5p  | 119-125 | 7mer-1A | -0.01 | 35 | -0.01 | 0     | N/A      |
| hsa-miR-548x-5p  | 119-125 | 7mer-1A | -0.01 | 35 | -0.01 | 0     | N/A      |
| hsa-miR-548aj-5p | 119-125 | 7mer-1A | -0.01 | 35 | -0.01 | 0     | N/A      |
| hsa-miR-1468-3p  | 119-125 | 7mer-1A | -0.01 | 26 | -0.01 | 0     | N/A      |
| hsa-miR-527      | 120-126 | 7mer-1A | -0.01 | 44 | -0.01 | 0.024 | N/A      |
| hsa-miR-518a-5p  | 120-126 | 7mer-1A | -0.01 | 44 | -0.01 | 0.024 | N/A      |

|                 |         |         |       |    |       |       |          |
|-----------------|---------|---------|-------|----|-------|-------|----------|
| hsa-miR-4684-3p | 121-127 | 7mer-m8 | -0.03 | 36 | -0.03 | 0     | N/A      |
| hsa-miR-30b-5p  | 128-134 | 7mer-1A | -0.01 | 9  | -0.01 | 0.122 | <<br>0.1 |
| hsa-miR-30c-5p  | 128-134 | 7mer-1A | -0.01 | 9  | -0.01 | 0.122 | <<br>0.1 |
| hsa-miR-30a-5p  | 128-134 | 7mer-1A | -0.01 | 9  | -0.01 | 0.122 | <<br>0.1 |
| hsa-miR-30e-5p  | 128-134 | 7mer-1A | -0.01 | 9  | -0.01 | 0.122 | <<br>0.1 |
| hsa-miR-30d-5p  | 128-134 | 7mer-1A | -0.01 | 9  | -0.01 | 0.122 | <<br>0.1 |
| hsa-miR-8086    | 137-143 | 7mer-m8 | -0.13 | 71 | -0.13 | 0     | N/A      |
| hsa-miR-6069    | 139-145 | 7mer-1A | -0.06 | 52 | -0.06 | 0     | N/A      |
| hsa-miR-4794    | 140-146 | 7mer-m8 | -0.02 | 35 | -0.02 | 0     | N/A      |
| hsa-miR-664a-5p | 140-146 | 7mer-m8 | -0.02 | 32 | -0.02 | 0     | N/A      |
| hsa-miR-221-5p  | 142-148 | 7mer-1A | -0.19 | 90 | -0.19 | 0.085 | N/A      |
| hsa-miR-8073    | 142-148 | 7mer-1A | -0.15 | 85 | -0.15 | 0.085 | N/A      |
| hsa-miR-1343-3p | 143-149 | 7mer-1A | -0.01 | 27 | -0.01 | 0     | N/A      |
| hsa-miR-6783-3p | 143-149 | 7mer-1A | -0.01 | 24 | -0.01 | 0     | N/A      |
| hsa-miR-5585-5p | 150-156 | 7mer-m8 | -0.03 | 54 | -0.03 | 0     | N/A      |
| hsa-miR-3190-3p | 153-159 | 7mer-m8 | -0.08 | 65 | -0.08 | 0     | N/A      |
| hsa-miR-6134    | 156-162 | 7mer-m8 | -0.06 | 47 | -0.06 | 0.024 | N/A      |
| hsa-miR-455-5p  | 164-170 | 7mer-m8 | -0.17 | 84 | -0.17 | 1.349 | <<br>0.1 |
| hsa-miR-4698    | 168-174 | 7mer-m8 | -0.02 | 59 | -0.02 | 0     | N/A      |

|                 |         |         |       |    |       |       |          |
|-----------------|---------|---------|-------|----|-------|-------|----------|
| hsa-miR-186-3p  | 171-177 | 7mer-1A | -0.01 | 38 | -0.01 | 0.442 | N/A      |
| hsa-miR-891b    | 177-184 | 8mer    | -0.03 | 36 | -0.03 | 0.099 | N/A      |
| hsa-miR-4709-3p | 193-199 | 7mer-1A | -0.02 | 44 | -0.02 | 0.312 | N/A      |
| hsa-miR-27b-3p  | 200-207 | 8mer    | -0.05 | 67 | -0.05 | 1.696 | <<br>0.1 |
| hsa-miR-27a-3p  | 200-207 | 8mer    | -0.05 | 67 | -0.05 | 1.696 | <<br>0.1 |
| hsa-miR-3681-3p | 200-206 | 7mer-1A | -0.02 | 48 | -0.02 | 2.853 | 0.2<br>5 |
| hsa-miR-128-3p  | 200-206 | 7mer-1A | -0.01 | 31 | -0.01 | 2.853 | 0.2<br>5 |
| hsa-miR-216a-3p | 200-206 | 7mer-1A | -0.01 | 30 | -0.01 | 2.853 | 0.2<br>5 |
| hsa-miR-513a-5p | 201-207 | 7mer-1A | -0.01 | 34 | -0.01 | 0.099 | N/A      |
| hsa-miR-3977    | 204-210 | 7mer-m8 | -0.02 | 39 | -0.02 | 0     | N/A      |
| hsa-miR-3607-3p | 211-218 | 8mer    | -0.03 | 59 | -0.03 | 0     | N/A      |
| hsa-miR-3686    | 212-219 | 8mer    | -0.03 | 37 | -0.03 | 0     | N/A      |
| hsa-miR-4743-3p | 214-220 | 7mer-1A | -0.01 | 39 | -0.01 | 0     | N/A      |
| hsa-miR-4652-3p | 214-220 | 7mer-1A | -0.01 | 36 | -0.01 | 0     | N/A      |
| hsa-miR-6854-3p | 217-224 | 8mer    | -0.36 | 91 | -0.36 | 0     | N/A      |
| hsa-miR-1287-5p | 224-231 | 8mer    | -0.19 | 93 | -0.19 | 0     | N/A      |
| hsa-miR-3135b   | 225-231 | 7mer-1A | -0.05 | 59 | -0.05 | 0     | N/A      |
| hsa-miR-195-3p  | 234-240 | 7mer-m8 | -0.02 | 41 | -0.02 | 0.085 | N/A      |
| hsa-miR-16-2-3p | 234-240 | 7mer-m8 | -0.02 | 40 | -0.02 | 0.085 | N/A      |
| hsa-miR-338-5p  | 235-241 | 7mer-m8 | -0.02 | 51 | -0.02 | 0.085 | N/A      |

|                 |         |         |       |    |       |       |     |
|-----------------|---------|---------|-------|----|-------|-------|-----|
| hsa-miR-7845-5p | 239-245 | 7mer-m8 | -0.17 | 81 | -0.17 | 0     | N/A |
| hsa-miR-4475    | 240-246 | 7mer-m8 | -0.22 | 94 | -0.22 | 0     | N/A |
| hsa-miR-7158-5p | 246-252 | 7mer-1A | -0.03 | 61 | -0.03 | 0     | N/A |
| hsa-miR-767-3p  | 247-254 | 8mer    | -0.19 | 91 | -0.19 | 0.085 | N/A |
| hsa-miR-6828-3p | 248-255 | 8mer    | -0.22 | 93 | -0.22 | 0     | N/A |
| hsa-miR-6071    | 249-255 | 7mer-1A | -0.12 | 78 | -0.12 | 0     | N/A |
| hsa-miR-544a    | 250-256 | 7mer-1A | -0.14 | 80 | -0.14 | 0.024 | N/A |
| hsa-miR-6738-3p | 250-256 | 7mer-1A | -0.01 | 32 | -0.01 | 0     | N/A |
| hsa-miR-3606-3p | 253-260 | 8mer    | -0.03 | 89 | -0.03 | 0     | N/A |
| hsa-miR-513c-3p | 253-260 | 8mer    | -0.03 | 89 | -0.03 | 0     | N/A |
| hsa-miR-513a-3p | 253-260 | 8mer    | -0.03 | 89 | -0.03 | 0     | N/A |
| hsa-miR-577     | 257-263 | 7mer-m8 | -0.02 | 38 | -0.02 | 0.024 | N/A |
| hsa-miR-488-3p  | 262-268 | 7mer-1A | -0.07 | 77 | -0.07 | 0.638 | N/A |
| hsa-miR-510-3p  | 263-269 | 7mer-1A | -0.01 | 43 | -0.01 | 0     | N/A |
| hsa-miR-6800-3p | 269-275 | 7mer-1A | -0.05 | 67 | -0.05 | 0     | N/A |
| hsa-miR-3144-3p | 271-277 | 7mer-m8 | -0.02 | 19 | -0.02 | 0     | N/A |
| hsa-miR-3671    | 276-283 | 8mer    | -0.03 | 59 | -0.03 | 0     | N/A |
| hsa-miR-607     | 277-284 | 8mer    | -0.03 | 85 | -0.03 | 0     | N/A |
| hsa-miR-1305    | 279-285 | 7mer-1A | -0.01 | 49 | -0.01 | 0     | N/A |
| hsa-miR-335-3p  | 280-286 | 7mer-1A | -0.01 | 58 | -0.01 | 0.085 | N/A |
| hsa-miR-5003-3p | 291-297 | 7mer-1A | -0.01 | 46 | -0.01 | 0     | N/A |
| hsa-miR-4668-3p | 305-311 | 7mer-m8 | -0.02 | 74 | -0.02 | 0     | N/A |
| hsa-miR-548c-3p | 306-313 | 8mer    | -0.03 | 93 | -0.03 | 0.024 | N/A |
| hsa-miR-95-5p   | 310-317 | 8mer    | -0.03 | 47 | -0.03 | 0.085 | N/A |
| hsa-miR-6793-3p | 318-324 | 7mer-1A | -0.01 | 53 | -0.01 | 0     | N/A |

|                  |         |         |       |    |       |       |     |
|------------------|---------|---------|-------|----|-------|-------|-----|
| hsa-miR-5695     | 326-332 | 7mer-m8 | -0.08 | 72 | -0.08 | 0     | N/A |
| hsa-miR-3145-5p  | 327-333 | 7mer-m8 | -0.04 | 53 | -0.04 | 0.085 | N/A |
| hsa-miR-548ah-3p | 331-337 | 7mer-m8 | -0.02 | 67 | -0.02 | 0.085 | N/A |
| hsa-miR-548aj-3p | 331-337 | 7mer-m8 | -0.02 | 67 | -0.02 | 0.085 | N/A |
| hsa-miR-548aq-3p | 331-337 | 7mer-m8 | -0.02 | 67 | -0.02 | 0.085 | N/A |
| hsa-miR-548ae-3p | 331-337 | 7mer-m8 | -0.02 | 67 | -0.02 | 0.085 | N/A |
| hsa-miR-548am-3p | 331-337 | 7mer-m8 | -0.02 | 67 | -0.02 | 0.085 | N/A |
| hsa-miR-548x-3p  | 331-337 | 7mer-m8 | -0.02 | 67 | -0.02 | 0.085 | N/A |
| hsa-miR-548j-3p  | 331-337 | 7mer-m8 | -0.02 | 67 | -0.02 | 0.085 | N/A |
| hsa-miR-1273c    | 340-346 | 7mer-m8 | -0.24 | 89 | -0.24 | 0     | N/A |
| hsa-miR-4670-5p  | 342-348 | 7mer-1A | -0.24 | 78 | -0.24 | 0     | N/A |
| hsa-miR-6826-5p  | 346-352 | 7mer-1A | -0.01 | 24 | -0.01 | 0     | N/A |
| hsa-miR-551b-5p  | 349-355 | 7mer-m8 | -0.02 | 62 | -0.02 | 0.504 | N/A |
| hsa-miR-548c-3p  | 351-358 | 8mer    | -0.03 | 93 | -0.03 | 0.024 | N/A |
| hsa-miR-548ao-5p | 356-363 | 8mer    | -0.07 | 53 | -0.07 | 0     | N/A |
| hsa-miR-548ax    | 356-363 | 8mer    | -0.07 | 53 | -0.07 | 0     | N/A |
| hsa-miR-5585-5p  | 357-363 | 7mer-1A | -0.01 | 28 | -0.01 | 0     | N/A |
| hsa-miR-3616-5p  | 358-364 | 7mer-1A | -0.1  | 79 | -0.1  | 0     | N/A |
| hsa-miR-573      | 358-364 | 7mer-1A | -0.09 | 76 | -0.09 | 0     | N/A |
| hsa-miR-6077     | 369-376 | 8mer    | -0.03 | 65 | -0.03 | 0     | N/A |
| hsa-miR-7-5p     | 370-376 | 7mer-1A | -0.01 | 39 | -0.01 | 1.466 | 0.1 |
| hsa-miR-6079     | 371-377 | 7mer-1A | -0.01 | 41 | -0.01 | 0     | N/A |
| hsa-miR-502-5p   | 378-384 | 7mer-1A | -0.01 | 35 | -0.01 | 0.024 | N/A |
| hsa-miR-6875-3p  | 381-387 | 7mer-m8 | -0.02 | 52 | -0.02 | 0     | N/A |
| hsa-miR-4778-3p  | 382-388 | 7mer-m8 | -0.02 | 50 | -0.02 | 0     | N/A |

|                       |         |         |       |    |       |       |          |
|-----------------------|---------|---------|-------|----|-------|-------|----------|
| hsa-miR-103a-2-5<br>p | 383-389 | 7mer-m8 | -0.02 | 33 | -0.02 | 0.494 | N/A      |
| hsa-miR-634           | 391-398 | 8mer    | -0.03 | 23 | -0.03 | 0.024 | N/A      |
| hsa-miR-373-3p        | 398-404 | 7mer-m8 | -0.02 | 36 | -0.02 | 1.504 | <<br>0.1 |
| hsa-miR-302e          | 398-404 | 7mer-m8 | -0.02 | 29 | -0.02 | 1.504 | <<br>0.1 |
| hsa-miR-302a-3p       | 398-404 | 7mer-m8 | -0.02 | 29 | -0.02 | 1.504 | <<br>0.1 |
| hsa-miR-302c-3p.<br>1 | 398-404 | 7mer-m8 | -0.02 | 29 | -0.02 | 1.504 | <<br>0.1 |
| hsa-miR-302b-3p       | 398-404 | 7mer-m8 | -0.02 | 29 | -0.02 | 1.504 | <<br>0.1 |
| hsa-miR-302d-3p       | 398-404 | 7mer-m8 | -0.02 | 29 | -0.02 | 1.504 | <<br>0.1 |
| hsa-miR-520d-3p       | 398-404 | 7mer-m8 | -0.02 | 28 | -0.02 | 1.504 | <<br>0.1 |
| hsa-miR-520e          | 398-404 | 7mer-m8 | -0.02 | 28 | -0.02 | 1.504 | <<br>0.1 |
| hsa-miR-520c-3p       | 398-404 | 7mer-m8 | -0.02 | 27 | -0.02 | 1.504 | <<br>0.1 |
| hsa-miR-372-3p        | 398-404 | 7mer-m8 | -0.02 | 27 | -0.02 | 1.504 | <<br>0.1 |
| hsa-miR-520a-3p       | 398-404 | 7mer-m8 | -0.02 | 27 | -0.02 | 1.504 | <<br>0.1 |
| hsa-miR-520b          | 398-404 | 7mer-m8 | -0.02 | 27 | -0.02 | 1.504 | <        |

|                  |         |         |       |    |       |       |          |
|------------------|---------|---------|-------|----|-------|-------|----------|
|                  |         |         |       |    |       |       | 0.1      |
| hsa-miR-451b     | 402-408 | 7mer-1A | -0.01 | 21 | -0.01 | 0     | N/A      |
| hsa-miR-6755-5p  | 406-412 | 7mer-m8 | -0.02 | 17 | -0.02 | 0     | N/A      |
| hsa-miR-6823-5p  | 408-414 | 7mer-1A | -0.04 | 55 | -0.04 | 0     | N/A      |
| hsa-miR-4518     | 409-415 | 7mer-m8 | -0.02 | 58 | -0.02 | 0.024 | N/A      |
| hsa-miR-1266-5p  | 409-415 | 7mer-m8 | -0.02 | 49 | -0.02 | 0.024 | N/A      |
| hsa-miR-510-5p   | 410-416 | 7mer-m8 | -0.02 | 36 | -0.02 | 0     | N/A      |
| hsa-miR-4680-5p  | 413-419 | 7mer-1A | -0.01 | 21 | -0.01 | 0     | N/A      |
| hsa-miR-6744-5p  | 417-423 | 7mer-1A | -0.01 | 23 | -0.01 | 0     | N/A      |
| hsa-miR-1255b-5p | 417-423 | 7mer-1A | -0.01 | 18 | -0.01 | 0.099 | N/A      |
| hsa-miR-1255a    | 417-423 | 7mer-1A | -0.01 | 15 | -0.01 | 0.099 | N/A      |
| hsa-miR-3116     | 420-426 | 7mer-m8 | -0.07 | 70 | -0.07 | 0.024 | N/A      |
| hsa-miR-1254     | 420-426 | 7mer-m8 | -0.05 | 54 | -0.05 | 0.024 | N/A      |
| hsa-miR-2861     | 422-429 | 8mer    | -0.09 | 66 | -0.09 | 0     | N/A      |
| hsa-miR-6724-5p  | 424-430 | 7mer-1A | -0.05 | 54 | -0.05 | 0     | N/A      |
| hsa-miR-6773-5p  | 424-430 | 7mer-1A | -0.04 | 46 | -0.04 | 0     | N/A      |
| hsa-miR-3147     | 425-431 | 7mer-m8 | -0.06 | 70 | -0.06 | 0     | N/A      |
| hsa-miR-4259     | 426-432 | 7mer-m8 | -0.02 | 33 | -0.02 | 0     | N/A      |
| hsa-miR-27a-3p   | 430-436 | 7mer-m8 | -0.02 | 47 | -0.02 | 1.913 | <<br>0.1 |
| hsa-miR-27b-3p   | 430-436 | 7mer-m8 | -0.02 | 46 | -0.02 | 1.913 | <<br>0.1 |
| hsa-miR-128-3p   | 430-436 | 7mer-1A | -0.01 | 31 | -0.01 | 1.913 | <<br>0.1 |
| hsa-miR-216a-3p  | 430-436 | 7mer-1A | -0.01 | 30 | -0.01 | 1.913 | <        |

|                  |         |         |       |    |       |       |          |
|------------------|---------|---------|-------|----|-------|-------|----------|
|                  |         |         |       |    |       |       | 0.1      |
| hsa-miR-3681-3p  | 430-436 | 7mer-1A | -0.01 | 28 | -0.01 | 1.913 | <<br>0.1 |
| hsa-miR-1178-3p  | 433-440 | 8mer    | -0.04 | 64 | -0.04 | 0.024 | N/A      |
| hsa-miR-6841-3p  | 437-443 | 7mer-1A | -0.14 | 72 | -0.14 | 0     | N/A      |
| hsa-miR-502-5p   | 437-443 | 7mer-m8 | -0.04 | 62 | -0.04 | 0.099 | N/A      |
| hsa-miR-1915-5p  | 437-443 | 7mer-1A | -0.01 | 24 | -0.01 | 0     | N/A      |
| hsa-miR-4448     | 439-446 | 8mer    | -0.03 | 58 | -0.03 | 0     | N/A      |
| hsa-miR-6772-3p  | 440-446 | 7mer-m8 | -0.05 | 53 | -0.05 | 0     | N/A      |
| hsa-miR-4268     | 440-446 | 7mer-1A | -0.01 | 33 | -0.01 | 0     | N/A      |
|                  |         |         |       |    |       |       | <<br>0.1 |
| hsa-miR-218-5p   | 443-449 | 7mer-1A | -0.01 | 28 | -0.01 | 0.069 | <<br>0.1 |
| hsa-miR-4474-3p  | 449-456 | 8mer    | -0.12 | 73 | -0.12 | 0     | N/A      |
| hsa-miR-7108-5p  | 450-456 | 7mer-1A | -0.01 | 41 | -0.01 | 0     | N/A      |
| hsa-miR-8087     | 455-461 | 7mer-m8 | -0.02 | 57 | -0.02 | 0     | N/A      |
| hsa-miR-6077     | 458-464 | 7mer-1A | -0.01 | 38 | -0.01 | 0     | N/A      |
| hsa-miR-875-3p   | 460-466 | 7mer-1A | -0.03 | 49 | -0.03 | 0     | N/A      |
| hsa-miR-1299     | 460-466 | 7mer-m8 | -0.04 | 47 | -0.04 | 0.024 | N/A      |
| hsa-miR-6128     | 460-466 | 7mer-1A | -0.01 | 33 | -0.01 | 0.024 | N/A      |
| hsa-miR-518c-5p  | 461-467 | 7mer-m8 | -0.02 | 31 | -0.02 | 0     | N/A      |
| hsa-miR-6780a-3p | 463-469 | 7mer-m8 | -0.11 | 76 | -0.11 | 0     | N/A      |
| hsa-miR-5196-3p  | 465-471 | 7mer-m8 | -0.08 | 76 | -0.08 | 0     | N/A      |
| hsa-miR-6128     | 476-482 | 7mer-m8 | -0.02 | 47 | -0.02 | 0.024 | N/A      |
| hsa-miR-7843-3p  | 490-496 | 7mer-1A | -0.02 | 36 | -0.02 | 0     | N/A      |
| hsa-miR-127-5p   | 490-496 | 7mer-1A | -0.01 | 26 | -0.01 | 0     | N/A      |

|                  |         |         |       |    |       |       |          |
|------------------|---------|---------|-------|----|-------|-------|----------|
| hsa-miR-4635     | 491-497 | 7mer-m8 | -0.02 | 58 | -0.02 | 0     | N/A      |
| hsa-miR-671-5p   | 497-504 | 8mer    | -0.15 | 82 | -0.15 | 0.085 | N/A      |
| hsa-miR-6079     | 498-504 | 7mer-m8 | -0.06 | 77 | -0.06 | 0     | N/A      |
| hsa-miR-6828-5p  | 498-504 | 7mer-1A | -0.11 | 71 | -0.11 | 0.085 | N/A      |
| hsa-miR-3190-3p  | 499-505 | 7mer-m8 | -0.08 | 62 | -0.08 | 0     | N/A      |
| hsa-miR-6499-3p  | 503-509 | 7mer-1A | -0.01 | 23 | -0.01 | 0     | N/A      |
| hsa-miR-6516-5p  | 504-511 | 8mer    | -0.03 | 60 | -0.03 | 0     | N/A      |
| hsa-miR-455-3p.2 | 504-510 | 7mer-1A | -0.01 | 46 | -0.01 | 1.231 | <<br>0.1 |
| hsa-miR-557      | 506-512 | 7mer-1A | -0.01 | 51 | -0.01 | 0.099 | N/A      |
| hsa-miR-507      | 506-512 | 7mer-1A | -0.01 | 43 | -0.01 | 0.099 | N/A      |
| hsa-miR-3680-3p  | 506-512 | 7mer-1A | -0.01 | 33 | -0.01 | 0     | N/A      |
| hsa-miR-450b-5p  | 506-512 | 7mer-1A | -0.01 | 23 | -0.01 | 0.085 | N/A      |
| hsa-miR-19a-5p   | 507-514 | 8mer    | -0.03 | 63 | -0.03 | 0.085 | N/A      |
| hsa-miR-19b-2-5p | 507-514 | 8mer    | -0.03 | 62 | -0.03 | 0.085 | N/A      |
| hsa-miR-19b-1-5p | 507-514 | 8mer    | -0.03 | 62 | -0.03 | 0.085 | N/A      |
| hsa-miR-2052     | 508-514 | 7mer-1A | -0.01 | 18 | -0.01 | 0     | N/A      |
| hsa-miR-4255     | 511-517 | 7mer-1A | -0.04 | 67 | -0.04 | 0     | N/A      |
| hsa-miR-142-3p.2 | 511-518 | 8mer    | -0.03 | 49 | -0.03 | 0.229 | <<br>0.1 |
| hsa-miR-3591-5p  | 512-519 | 8mer    | -0.06 | 63 | -0.06 | 0     | N/A      |
| hsa-miR-432-5p   | 522-528 | 7mer-1A | -0.03 | 45 | -0.03 | 0.099 | N/A      |
| hsa-miR-1248     | 525-531 | 7mer-m8 | -0.02 | 39 | -0.02 | 0.024 | N/A      |
| hsa-miR-1245b-5p | 528-534 | 7mer-m8 | -0.09 | 79 | -0.09 | 0     | N/A      |
| hsa-miR-3142     | 528-534 | 7mer-m8 | -0.06 | 66 | -0.06 | 0     | N/A      |

|                  |         |         |       |    |       |       |          |
|------------------|---------|---------|-------|----|-------|-------|----------|
| hsa-miR-4493     | 530-537 | 8mer    | -0.2  | 88 | -0.2  | 0     | N/A      |
| hsa-miR-6126     | 531-537 | 7mer-m8 | -0.02 | 62 | -0.02 | 0     | N/A      |
| hsa-miR-605-3p   | 531-537 | 7mer-1A | -0.08 | 55 | -0.08 | 0     | N/A      |
| hsa-miR-8060     | 533-539 | 7mer-m8 | -0.02 | 49 | -0.02 | 0     | N/A      |
| hsa-miR-6508-3p  | 537-543 | 7mer-m8 | -0.02 | 28 | -0.02 | 0     | N/A      |
| hsa-miR-6762-5p  | 538-545 | 8mer    | -0.1  | 50 | -0.1  | 0.085 | N/A      |
| hsa-miR-6845-5p  | 538-545 | 8mer    | -0.09 | 49 | -0.09 | 0.085 | N/A      |
| hsa-miR-128-1-5p | 539-545 | 7mer-1A | -0.07 | 54 | -0.07 | 0.085 | N/A      |
| hsa-miR-1227-5p  | 539-545 | 7mer-m8 | -0.02 | 43 | -0.02 | 0.085 | N/A      |
| hsa-miR-128-2-5p | 539-545 | 7mer-1A | -0.02 | 36 | -0.02 | 0.085 | N/A      |
| hsa-miR-4731-5p  | 541-548 | 8mer    | -0.03 | 45 | -0.03 | 0     | N/A      |
| hsa-miR-5589-5p  | 542-548 | 7mer-1A | -0.01 | 37 | -0.01 | 0     | N/A      |
| hsa-miR-3692-5p  | 543-549 | 7mer-m8 | -0.02 | 41 | -0.02 | 0     | N/A      |
| hsa-miR-370-3p   | 544-550 | 7mer-m8 | -0.02 | 41 | -0.02 | 1.052 | N/A      |
| hsa-miR-6893-3p  | 544-550 | 7mer-m8 | -0.02 | 31 | -0.02 | 1.052 | N/A      |
| hsa-miR-1234-3p  | 547-553 | 7mer-m8 | -0.12 | 63 | -0.12 | 0.099 | N/A      |
| hsa-miR-7107-5p  | 547-553 | 7mer-m8 | -0.11 | 62 | -0.11 | 0.099 | N/A      |
| hsa-miR-6850-3p  | 549-555 | 7mer-1A | -0.22 | 85 | -0.22 | 0     | N/A      |
| hsa-miR-101-3p.1 | 559-566 | 8mer    | -0.03 | 63 | -0.03 | 0.898 | <<br>0.1 |
| hsa-miR-101-3p.2 | 560-566 | 7mer-m8 | -0.02 | 40 | -0.02 | 1.233 | <<br>0.1 |
| hsa-miR-144-3p   | 560-566 | 7mer-1A | -0.01 | 29 | -0.01 | 1.233 | <<br>0.1 |
| hsa-miR-4659b-5p | 573-579 | 7mer-m8 | -0.05 | 56 | -0.05 | 0     | N/A      |

|                  |         |         |       |    |       |       |     |
|------------------|---------|---------|-------|----|-------|-------|-----|
| hsa-miR-4659a-5p | 573-579 | 7mer-m8 | -0.03 | 49 | -0.03 | 0     | N/A |
| hsa-miR-4769-3p  | 574-580 | 7mer-m8 | -0.02 | 44 | -0.02 | 0     | N/A |
| hsa-miR-6817-5p  | 574-580 | 7mer-m8 | -0.02 | 43 | -0.02 | 0     | N/A |
| hsa-miR-6727-3p  | 575-581 | 7mer-m8 | -0.07 | 59 | -0.07 | 0     | N/A |
| hsa-miR-4722-3p  | 575-581 | 7mer-m8 | -0.06 | 52 | -0.06 | 0     | N/A |
| hsa-miR-1183     | 582-588 | 7mer-1A | -0.01 | 34 | -0.01 | 0.024 | N/A |
| hsa-miR-759      | 597-603 | 7mer-m8 | -0.02 | 51 | -0.02 | 0.099 | N/A |
| hsa-miR-4797-5p  | 598-604 | 7mer-m8 | -0.02 | 63 | -0.02 | 0     | N/A |
| hsa-miR-7845-5p  | 602-608 | 7mer-m8 | -0.02 | 13 | -0.02 | 0     | N/A |
| hsa-miR-4475     | 603-609 | 7mer-m8 | -0.02 | 51 | -0.02 | 0     | N/A |
| hsa-miR-7515     | 604-610 | 7mer-m8 | -0.02 | 18 | -0.02 | 0     | N/A |
| hsa-miR-3202     | 605-611 | 7mer-m8 | -0.05 | 56 | -0.05 | 0     | N/A |
| hsa-miR-6876-5p  | 606-612 | 7mer-m8 | -0.02 | 49 | -0.02 | 0     | N/A |
| hsa-miR-4476     | 606-612 | 7mer-m8 | -0.02 | 49 | -0.02 | 0     | N/A |
| hsa-miR-6840-3p  | 609-615 | 7mer-m8 | -0.02 | 49 | -0.02 | 0     | N/A |
| hsa-miR-6844     | 616-622 | 7mer-1A | -0.01 | 30 | -0.01 | 0     | N/A |
| hsa-miR-4778-3p  | 618-624 | 7mer-1A | -0.01 | 32 | -0.01 | 0     | N/A |
| hsa-miR-4659a-3p | 619-626 | 8mer    | -0.03 | 56 | -0.03 | 0     | N/A |
| hsa-miR-4659b-3p | 619-626 | 8mer    | -0.03 | 56 | -0.03 | 0     | N/A |
| hsa-miR-6875-3p  | 620-626 | 7mer-1A | -0.01 | 31 | -0.01 | 0     | N/A |
| hsa-miR-1468-5p  | 624-630 | 7mer-m8 | -0.04 | 16 | -0.04 | 0     | N/A |
| hsa-miR-1470     | 627-633 | 7mer-m8 | -0.02 | 61 | -0.02 | 0     | N/A |
| hsa-miR-6887-3p  | 628-635 | 8mer    | -0.11 | 62 | -0.11 | 0     | N/A |
| hsa-miR-6795-3p  | 629-635 | 7mer-1A | -0.14 | 82 | -0.14 | 0     | N/A |
| hsa-miR-6826-3p  | 629-635 | 7mer-m8 | -0.08 | 63 | -0.08 | 0     | N/A |

|                  |         |         |       |    |       |       |     |
|------------------|---------|---------|-------|----|-------|-------|-----|
| hsa-miR-6729-3p  | 631-637 | 7mer-m8 | -0.17 | 84 | -0.17 | 0     | N/A |
| hsa-miR-651-3p   | 644-650 | 7mer-1A | -0.01 | 28 | -0.01 | 0     | N/A |
| hsa-miR-4521     | 645-652 | 8mer    | -0.03 | 55 | -0.03 | 0     | N/A |
| hsa-miR-1264     | 650-656 | 7mer-1A | -0.05 | 74 | -0.05 | 0.024 | N/A |
| hsa-miR-3184-3p  | 650-656 | 7mer-1A | -0.01 | 40 | -0.01 | 0     | N/A |
| hsa-miR-548aq-5p | 654-660 | 7mer-m8 | -0.02 | 53 | -0.02 | 0.099 | N/A |
| hsa-miR-559      | 654-660 | 7mer-m8 | -0.02 | 44 | -0.02 | 0.099 | N/A |
| hsa-miR-548as-5p | 654-660 | 7mer-m8 | -0.02 | 43 | -0.02 | 0.099 | N/A |
| hsa-miR-548h-5p  | 654-660 | 7mer-m8 | -0.02 | 42 | -0.02 | 0.099 | N/A |
| hsa-miR-548j-5p  | 654-660 | 7mer-m8 | -0.02 | 42 | -0.02 | 0.099 | N/A |
| hsa-miR-548ap-5p | 654-660 | 7mer-m8 | -0.02 | 42 | -0.02 | 0.099 | N/A |
| hsa-miR-548ak    | 654-660 | 7mer-m8 | -0.02 | 41 | -0.02 | 0.099 | N/A |
| hsa-miR-548o-5p  | 654-660 | 7mer-m8 | -0.02 | 41 | -0.02 | 0.099 | N/A |
| hsa-miR-548d-5p  | 654-660 | 7mer-m8 | -0.02 | 41 | -0.02 | 0.099 | N/A |
| hsa-miR-548ay-5p | 654-660 | 7mer-m8 | -0.02 | 41 | -0.02 | 0.099 | N/A |
| hsa-miR-548w     | 654-660 | 7mer-m8 | -0.02 | 41 | -0.02 | 0.099 | N/A |
| hsa-miR-548c-5p  | 654-660 | 7mer-m8 | -0.02 | 41 | -0.02 | 0.099 | N/A |
| hsa-miR-548b-5p  | 654-660 | 7mer-m8 | -0.02 | 41 | -0.02 | 0.099 | N/A |
| hsa-miR-548ad-5p | 654-660 | 7mer-m8 | -0.02 | 41 | -0.02 | 0.099 | N/A |
| hsa-miR-548au-5p | 654-660 | 7mer-m8 | -0.02 | 41 | -0.02 | 0.099 | N/A |
| hsa-miR-548bb-5p | 654-660 | 7mer-m8 | -0.02 | 41 | -0.02 | 0.099 | N/A |
| hsa-miR-548am-5p | 654-660 | 7mer-m8 | -0.02 | 41 | -0.02 | 0.099 | N/A |
| hsa-miR-548ae-5p | 654-660 | 7mer-m8 | -0.02 | 41 | -0.02 | 0.099 | N/A |
| hsa-miR-548y     | 654-660 | 7mer-m8 | -0.02 | 40 | -0.02 | 0.099 | N/A |
| hsa-miR-548i     | 654-660 | 7mer-m8 | -0.02 | 40 | -0.02 | 0.099 | N/A |

|                   |         |               |       |     |       |       |       |
|-------------------|---------|---------------|-------|-----|-------|-------|-------|
| hsa-miR-548a-5p   | 654-660 | 7mer-m8       | -0.02 | 40  | -0.02 | 0.099 | N/A   |
| hsa-miR-548ar-5p  | 654-660 | 7mer-m8       | -0.02 | 39  | -0.02 | 0.099 | N/A   |
| hsa-miR-548ab     | 654-660 | 7mer-m8       | -0.02 | 39  | -0.02 | 0.099 | N/A   |
| hsa-miR-548n      | 655-661 | 7mer-m8       | -0.02 | 53  | -0.02 | 0.099 | N/A   |
| hsa-miR-520d-5p   | 659-665 | 7mer-1A       | -0.01 | 52  | -0.01 | 0.085 | N/A   |
| hsa-miR-524-5p    | 659-665 | 7mer-1A       | -0.01 | 51  | -0.01 | 0.085 | N/A   |
| hsa-miR-2681-5p   | 662-668 | 7mer-1A       | -0.01 | 53  | -0.01 | 0     | N/A   |
| hsa-miR-153-5p    | 664-670 | 7mer-m8       | -0.02 | 50  | -0.02 | 0.085 | N/A   |
| hsa-miR-450a-2-3p | 665-676 | non-canonical | N/A   | N/A | N/A   | 0     | N/A   |
| hsa-miR-450a-2-3p | 665-676 | non-canonical | N/A   | N/A | N/A   | 0     | N/A   |
| hsa-miR-6810-5p   | 670-676 | 7mer-m8       | -0.15 | 84  | -0.15 | 0     | N/A   |
| hsa-miR-4652-5p   | 670-676 | 7mer-1A       | -0.14 | 71  | -0.14 | 0     | N/A   |
| hsa-miR-3191-3p   | 670-676 | 7mer-1A       | -0.1  | 62  | -0.1  | 0     | N/A   |
| hsa-miR-3144-5p   | 670-676 | 7mer-1A       | -0.06 | 47  | -0.06 | 0     | N/A   |
| hsa-miR-491-5p    | 671-677 | 7mer-m8       | -0.06 | 42  | -0.06 | 0.142 | N/A   |
| hsa-miR-126-3p.2  | 676-682 | 7mer-m8       | -0.23 | 65  | -0.23 | 1.13  | < 0.1 |
| hsa-miR-6763-5p   | 686-692 | 7mer-m8       | -0.1  | 66  | -0.1  | 0.085 | N/A   |
| hsa-miR-1343-5p   | 686-692 | 7mer-1A       | -0.05 | 62  | -0.05 | 0.099 | N/A   |
| hsa-miR-3150a-3p  | 686-692 | 7mer-m8       | -0.07 | 59  | -0.07 | 0.085 | N/A   |
| hsa-miR-3175      | 686-692 | 7mer-1A       | -0.1  | 58  | -0.1  | 0     | N/A   |
| hsa-miR-939-5p    | 686-692 | 7mer-1A       | -0.04 | 51  | -0.04 | 0.099 | N/A   |
| hsa-miR-6825-5p   | 686-692 | 7mer-1A       | -0.03 | 23  | -0.03 | 0     | N/A   |

|                 |         |         |       |    |       |       |          |
|-----------------|---------|---------|-------|----|-------|-------|----------|
| hsa-miR-491-5p  | 687-693 | 7mer-m8 | -0.06 | 43 | -0.06 | 0.22  | N/A      |
| hsa-miR-1296-3p | 688-694 | 7mer-m8 | -0.08 | 69 | -0.08 | 0.085 | N/A      |
| hsa-miR-194-3p  | 689-696 | 8mer    | -0.08 | 75 | -0.08 | 0     | N/A      |
| hsa-miR-5693    | 690-696 | 7mer-1A | -0.01 | 43 | -0.01 | 0     | N/A      |
| hsa-miR-5094    | 691-697 | 7mer-m8 | -0.02 | 31 | -0.02 | 0     | N/A      |
| hsa-miR-6884-3p | 694-700 | 7mer-1A | -0.01 | 37 | -0.01 | 0     | N/A      |
| hsa-miR-7152-3p | 698-704 | 7mer-m8 | -0.17 | 85 | -0.17 | 0     | N/A      |
| hsa-miR-497-3p  | 704-710 | 7mer-m8 | -0.02 | 68 | -0.02 | 0.085 | N/A      |
| hsa-miR-4261    | 707-713 | 7mer-1A | -0.01 | 14 | -0.01 | 0     | N/A      |
| hsa-miR-875-3p  | 708-714 | 7mer-m8 | -0.02 | 33 | -0.02 | 0.085 | N/A      |
| hsa-miR-6847-3p | 716-722 | 7mer-m8 | -0.03 | 53 | -0.03 | 0     | N/A      |
| hsa-miR-574-3p  | 718-724 | 7mer-m8 | -0.23 | 78 | -0.23 | 0     | N/A      |
| hsa-miR-622     | 726-732 | 7mer-1A | -0.01 | 28 | -0.01 | 0.099 | N/A      |
| hsa-miR-6882-5p | 731-737 | 7mer-m8 | -0.05 | 73 | -0.05 | 0     | N/A      |
| hsa-miR-7-5p    | 740-747 | 8mer    | -0.16 | 90 | -0.16 | 0.245 | <<br>0.1 |
| hsa-miR-6077    | 741-747 | 7mer-1A | -0.01 | 38 | -0.01 | 0     | N/A      |
| hsa-miR-206     | 746-752 | 7mer-1A | -0.03 | 50 | -0.03 | 2.165 | <<br>0.1 |
| hsa-miR-1-3p    | 746-752 | 7mer-1A | -0.03 | 50 | -0.03 | 2.165 | <<br>0.1 |
| hsa-miR-613     | 746-752 | 7mer-1A | -0.01 | 24 | -0.01 | 2.165 | <<br>0.1 |
| hsa-miR-548o-3p | 755-761 | 7mer-1A | -0.01 | 38 | -0.01 | 0.099 | N/A      |
| hsa-miR-1323    | 755-761 | 7mer-1A | -0.01 | 36 | -0.01 | 0.099 | N/A      |

|                  |         |         |       |    |       |       |          |
|------------------|---------|---------|-------|----|-------|-------|----------|
| hsa-miR-607      | 757-763 | 7mer-1A | -0.01 | 40 | -0.01 | 0     | N/A      |
| hsa-miR-4682     | 762-768 | 7mer-m8 | -0.06 | 71 | -0.06 | 0     | N/A      |
| hsa-miR-103a-3p  | 770-776 | 7mer-m8 | -0.04 | 49 | -0.04 | 0.242 | <<br>0.1 |
| hsa-miR-107      | 770-776 | 7mer-m8 | -0.04 | 49 | -0.04 | 0.242 | <<br>0.1 |
| hsa-miR-486-3p   | 773-779 | 7mer-m8 | -0.14 | 57 | -0.14 | 0.085 | N/A      |
| hsa-miR-4688     | 774-780 | 7mer-m8 | -0.1  | 64 | -0.1  | 0     | N/A      |
| hsa-miR-6743-5p  | 774-780 | 7mer-m8 | -0.08 | 56 | -0.08 | 0     | N/A      |
| hsa-miR-4524b-3p | 778-784 | 7mer-m8 | -0.02 | 56 | -0.02 | 0     | N/A      |
| hsa-miR-4696     | 781-787 | 7mer-m8 | -0.08 | 73 | -0.08 | 0     | N/A      |
| hsa-miR-451b     | 782-788 | 7mer-m8 | -0.02 | 30 | -0.02 | 0     | N/A      |
| hsa-miR-3120-3p  | 784-790 | 7mer-m8 | -0.02 | 35 | -0.02 | 0     | N/A      |
| hsa-miR-2277-3p  | 786-792 | 7mer-1A | -0.04 | 50 | -0.04 | 0     | N/A      |
| hsa-miR-433-3p   | 790-796 | 7mer-1A | -0.01 | 29 | -0.01 | 1.126 | N/A      |
| hsa-miR-7154-5p  | 790-796 | 7mer-1A | -0.01 | 19 | -0.01 | 0     | N/A      |
| hsa-miR-29a-5p   | 795-801 | 7mer-m8 | -0.02 | 33 | -0.02 | 0     | N/A      |
| hsa-miR-8075     | 797-803 | 7mer-1A | -0.1  | 60 | -0.1  | 0     | N/A      |
| hsa-miR-628-5p   | 798-804 | 7mer-1A | -0.05 | 66 | -0.05 | 0.085 | N/A      |
| hsa-miR-4723-3p  | 804-811 | 8mer    | -0.09 | 72 | -0.09 | 0     | N/A      |
| hsa-miR-6769b-3p | 804-811 | 8mer    | -0.08 | 71 | -0.08 | 0     | N/A      |
| hsa-miR-3183     | 804-811 | 8mer    | -0.03 | 67 | -0.03 | 0     | N/A      |
| hsa-miR-7111-3p  | 805-811 | 7mer-m8 | -0.07 | 70 | -0.07 | 0     | N/A      |
| hsa-miR-5196-3p  | 807-814 | 8mer    | -0.12 | 82 | -0.12 | 0     | N/A      |
| hsa-miR-4793-5p  | 808-814 | 7mer-1A | -0.01 | 27 | -0.01 | 0     | N/A      |

|                 |         |         |       |    |       |       |     |
|-----------------|---------|---------|-------|----|-------|-------|-----|
| hsa-miR-592     | 812-818 | 7mer-m8 | -0.05 | 50 | -0.05 | 0.085 | N/A |
| hsa-miR-597-5p  | 812-818 | 7mer-1A | -0.01 | 21 | -0.01 | 0.085 | N/A |
| hsa-miR-4795-3p | 822-829 | 8mer    | -0.03 | 63 | -0.03 | 0     | N/A |
| hsa-miR-126-5p  | 822-828 | 7mer-1A | -0.01 | 38 | -0.01 | 0     | N/A |
| hsa-miR-6128    | 835-841 | 7mer-m8 | -0.02 | 47 | -0.02 | 0.099 | N/A |
| hsa-miR-3652    | 837-843 | 7mer-m8 | -0.1  | 76 | -0.1  | 0     | N/A |
| hsa-miR-4430    | 837-843 | 7mer-m8 | -0.08 | 71 | -0.08 | 0     | N/A |
| hsa-miR-4492    | 838-845 | 8mer    | -0.26 | 95 | -0.26 | 0.099 | N/A |
| hsa-miR-5001-5p | 838-845 | 8mer    | -0.34 | 95 | -0.34 | 0.099 | N/A |
| hsa-miR-4498    | 838-845 | 8mer    | -0.32 | 94 | -0.32 | 0.099 | N/A |
| hsa-miR-762     | 838-845 | 8mer    | -0.26 | 94 | -0.26 | 0.099 | N/A |
| hsa-miR-1587    | 839-845 | 7mer-m8 | -0.13 | 73 | -0.13 | 0     | N/A |
| hsa-miR-4656    | 839-845 | 7mer-1A | -0.12 | 73 | -0.12 | 0     | N/A |
| hsa-miR-4741    | 839-845 | 7mer-1A | -0.07 | 68 | -0.07 | 0     | N/A |
| hsa-miR-3620-5p | 839-845 | 7mer-m8 | -0.02 | 40 | -0.02 | 0     | N/A |
| hsa-miR-4675    | 839-845 | 7mer-1A | -0.01 | 34 | -0.01 | 0     | N/A |
| hsa-miR-6829-5p | 839-845 | 7mer-1A | -0.01 | 26 | -0.01 | 0     | N/A |
| hsa-miR-4417    | 840-847 | 8mer    | -0.14 | 82 | -0.14 | 0     | N/A |
| hsa-miR-4322    | 841-847 | 7mer-m8 | -0.18 | 87 | -0.18 | 0     | N/A |
| hsa-miR-4296    | 841-847 | 7mer-m8 | -0.18 | 86 | -0.18 | 0     | N/A |
| hsa-miR-4265    | 841-847 | 7mer-m8 | -0.18 | 85 | -0.18 | 0     | N/A |
| hsa-miR-299-3p  | 842-848 | 7mer-m8 | -0.09 | 71 | -0.09 | 0.32  | N/A |
| hsa-miR-4502    | 854-860 | 7mer-m8 | -0.02 | 40 | -0.02 | 0     | N/A |
| hsa-miR-8075    | 855-862 | 8mer    | -0.15 | 74 | -0.15 | 0     | N/A |
| hsa-miR-4728-3p | 857-863 | 7mer-m8 | -0.02 | 28 | -0.02 | 0     | N/A |

|                       |         |         |       |    |       |       |          |
|-----------------------|---------|---------|-------|----|-------|-------|----------|
| hsa-miR-7853-5p       | 860-866 | 7mer-m8 | -0.02 | 68 | -0.02 | 0     | N/A      |
| hsa-miR-105-5p        | 860-866 | 7mer-m8 | -0.02 | 68 | -0.02 | 0     | N/A      |
| hsa-miR-133b          | 866-872 | 7mer-m8 | -0.14 | 76 | -0.14 | 0.387 | <<br>0.1 |
| hsa-miR-133a-3p.<br>2 | 866-872 | 7mer-m8 | -0.14 | 76 | -0.14 | 0.387 | <<br>0.1 |
| hsa-miR-133a-3p.<br>1 | 866-872 | 7mer-1A | -0.02 | 26 | -0.02 | 0.387 | <<br>0.1 |
| hsa-miR-664b-5p       | 873-879 | 7mer-1A | -0.18 | 71 | -0.18 | 0     | N/A      |
| hsa-miR-4417          | 874-881 | 8mer    | -0.14 | 82 | -0.14 | 0     | N/A      |
| hsa-miR-4265          | 875-881 | 7mer-m8 | -0.12 | 77 | -0.12 | 0     | N/A      |
| hsa-miR-4322          | 875-881 | 7mer-m8 | -0.11 | 77 | -0.11 | 0     | N/A      |
| hsa-miR-4296          | 875-881 | 7mer-m8 | -0.12 | 77 | -0.12 | 0     | N/A      |
| hsa-miR-134-3p        | 876-882 | 7mer-m8 | -0.02 | 40 | -0.02 | 0.085 | N/A      |
| hsa-miR-1207-3p       | 880-886 | 7mer-1A | -0.01 | 34 | -0.01 | 0.024 | N/A      |
| hsa-miR-6787-3p       | 881-888 | 8mer    | -0.03 | 64 | -0.03 | 0     | N/A      |
| hsa-miR-3692-3p       | 890-896 | 7mer-m8 | -0.02 | 32 | -0.02 | 0.085 | N/A      |
| hsa-miR-4678          | 895-902 | 8mer    | -0.09 | 70 | -0.09 | 0     | N/A      |
| hsa-miR-331-5p        | 896-903 | 8mer    | -0.15 | 81 | -0.15 | 0.085 | N/A      |
| hsa-miR-6509-5p       | 897-903 | 7mer-m8 | -0.02 | 14 | -0.02 | 0     | N/A      |
| hsa-miR-362-5p        | 902-908 | 7mer-1A | -0.07 | 70 | -0.07 | 0.138 | N/A      |
| hsa-miR-500b-5p       | 902-908 | 7mer-1A | -0.06 | 66 | -0.06 | 0.138 | N/A      |
| hsa-miR-501-5p        | 902-908 | 7mer-1A | -0.01 | 22 | -0.01 | 0.085 | N/A      |
| hsa-miR-1250-5p       | 908-914 | 7mer-m8 | -0.22 | 72 | -0.22 | 0.099 | N/A      |
| hsa-miR-4746-3p       | 909-915 | 7mer-m8 | -0.3  | 92 | -0.3  | 0     | N/A      |

|                 |         |         |       |    |       |       |          |
|-----------------|---------|---------|-------|----|-------|-------|----------|
| hsa-miR-4737    | 923-929 | 7mer-1A | -0.18 | 61 | -0.18 | 0     | N/A      |
| hsa-miR-450a-5p | 924-931 | 8mer    | -0.21 | 72 | -0.21 | 0.189 | N/A      |
| hsa-miR-129-5p  | 926-932 | 7mer-m8 | -0.02 | 81 | -0.02 | 0.189 | <<br>0.1 |
| hsa-miR-6888-5p | 936-943 | 8mer    | -0.1  | 86 | -0.1  | 0     | N/A      |
| hsa-miR-4266    | 938-944 | 7mer-1A | -0.07 | 52 | -0.07 | 0     | N/A      |
| hsa-miR-372-5p  | 944-950 | 7mer-m8 | -0.02 | 63 | -0.02 | 0.085 | N/A      |
| hsa-miR-2114-3p | 948-955 | 8mer    | -0.26 | 91 | -0.26 | 0.099 | N/A      |
| hsa-miR-6823-3p | 948-955 | 8mer    | -0.21 | 87 | -0.21 | 0.099 | N/A      |
| hsa-miR-1199-5p | 950-957 | 8mer    | -0.18 | 89 | -0.18 | 0.024 | N/A      |
| hsa-miR-6751-3p | 950-957 | 8mer    | -0.17 | 88 | -0.17 | 0.024 | N/A      |
| hsa-miR-4303    | 951-957 | 7mer-m8 | -0.04 | 68 | -0.04 | 0     | N/A      |
| hsa-miR-3200-5p | 952-958 | 7mer-m8 | -0.02 | 39 | -0.02 | 0     | N/A      |
| hsa-miR-452-3p  | 954-961 | 8mer    | -0.03 | 52 | -0.03 | 0     | N/A      |
| hsa-miR-586     | 961-967 | 7mer-m8 | -0.02 | 40 | -0.02 | 0.024 | N/A      |
| hsa-miR-492     | 968-974 | 7mer-m8 | -0.14 | 68 | -0.14 | 0.099 | N/A      |
| hsa-miR-6816-3p | 970-976 | 7mer-m8 | -0.03 | 69 | -0.03 | 0     | N/A      |
| hsa-miR-186-3p  | 974-980 | 7mer-m8 | -0.02 | 52 | -0.02 | 0     | N/A      |
| hsa-miR-5699-5p | 976-983 | 8mer    | -0.12 | 76 | -0.12 | 0     | N/A      |
| hsa-miR-3189-5p | 977-983 | 7mer-1A | -0.07 | 67 | -0.07 | 0     | N/A      |
| hsa-miR-4758-3p | 977-983 | 7mer-1A | -0.04 | 52 | -0.04 | 0     | N/A      |
| hsa-miR-3192-3p | 986-993 | 8mer    | -0.03 | 65 | -0.03 | 0     | N/A      |
| hsa-miR-3151-3p | 986-992 | 7mer-1A | -0.04 | 52 | -0.04 | 0     | N/A      |
| hsa-miR-4762-3p | 987-993 | 7mer-m8 | -0.02 | 51 | -0.02 | 0     | N/A      |
| hsa-miR-3182    | 989-995 | 7mer-1A | -0.01 | 42 | -0.01 | 0     | N/A      |

|                 |           |         |       |    |       |       |     |
|-----------------|-----------|---------|-------|----|-------|-------|-----|
| hsa-miR-6740-3p | 990-996   | 7mer-m8 | -0.13 | 78 | -0.13 | 0     | N/A |
| hsa-miR-3674    | 996-1002  | 7mer-1A | -0.07 | 53 | -0.07 | 0     | N/A |
| hsa-miR-153-5p  | 1000-1007 | 8mer    | -0.03 | 71 | -0.03 | 0.085 | N/A |
| hsa-miR-1250-3p | 1001-1007 | 7mer-1A | -0.01 | 46 | -0.01 | 0     | N/A |
| hsa-miR-5696    | 1002-1008 | 7mer-1A | -0.02 | 63 | -0.02 | 0     | N/A |
| hsa-miR-664b-3p | 1002-1008 | 7mer-1A | -0.01 | 42 | -0.01 | 0.099 | N/A |
| hsa-miR-579-3p  | 1002-1008 | 7mer-1A | -0.01 | 41 | -0.01 | 0.099 | N/A |
| hsa-miR-646     | 1008-1014 | 7mer-m8 | -0.07 | 70 | -0.07 | 0.024 | N/A |
| hsa-miR-2278    | 1010-1016 | 7mer-m8 | -0.02 | 51 | -0.02 | 0.335 | N/A |
| hsa-miR-6501-3p | 1011-1018 | 8mer    | -0.03 | 53 | -0.03 | 0     | N/A |
| hsa-miR-3942-3p | 1014-1020 | 7mer-1A | -0.01 | 34 | -0.01 | 0     | N/A |
| hsa-miR-205-3p  | 1015-1021 | 7mer-m8 | -0.02 | 69 | -0.02 | 0     | N/A |
| hsa-miR-6888-5p | 1020-1026 | 7mer-m8 | -0.09 | 86 | -0.09 | 0     | N/A |
| hsa-miR-4428    | 1021-1027 | 7mer-m8 | -0.05 | 58 | -0.05 | 0.024 | N/A |
| hsa-miR-4509    | 1024-1030 | 7mer-m8 | -0.02 | 43 | -0.02 | 0     | N/A |
| hsa-miR-6812-5p | 1035-1042 | 8mer    | -0.21 | 84 | -0.21 | 0     | N/A |
| hsa-miR-6819-5p | 1035-1042 | 8mer    | -0.2  | 83 | -0.2  | 0     | N/A |
| hsa-miR-6737-5p | 1035-1042 | 8mer    | -0.18 | 82 | -0.18 | 0     | N/A |
| hsa-miR-6747-5p | 1035-1041 | 7mer-1A | -0.13 | 74 | -0.13 | 0     | N/A |
| hsa-miR-342-5p  | 1035-1041 | 7mer-1A | -0.09 | 68 | -0.09 | 0.085 | N/A |
| hsa-miR-4664-5p | 1035-1041 | 7mer-1A | -0.06 | 65 | -0.06 | 0.085 | N/A |
| hsa-miR-608     | 1035-1041 | 7mer-1A | -0.14 | 52 | -0.14 | 0     | N/A |
| hsa-miR-4651    | 1035-1041 | 7mer-1A | -0.11 | 47 | -0.11 | 0     | N/A |
| hsa-miR-3170    | 1036-1042 | 7mer-1A | -0.07 | 62 | -0.07 | 0     | N/A |
| hsa-miR-6855-5p | 1036-1042 | 7mer-1A | -0.05 | 51 | -0.05 | 0     | N/A |

|                       |           |         |       |    |       |       |     |
|-----------------------|-----------|---------|-------|----|-------|-------|-----|
| hsa-miR-5572          | 1036-1042 | 7mer-m8 | -0.02 | 39 | -0.02 | 0     | N/A |
| hsa-miR-92a-1-5p      | 1038-1044 | 7mer-m8 | -0.17 | 69 | -0.17 | 0     | N/A |
| hsa-miR-7109-5p       | 1043-1050 | 8mer    | -0.33 | 94 | -0.33 | 0     | N/A |
| hsa-miR-328-5p        | 1043-1049 | 7mer-1A | -0.24 | 80 | -0.24 | 0     | N/A |
| hsa-miR-6885-5p       | 1043-1049 | 7mer-1A | -0.23 | 73 | -0.23 | 0     | N/A |
| hsa-miR-6795-5p       | 1043-1049 | 7mer-1A | -0.24 | 71 | -0.24 | 0     | N/A |
| hsa-miR-6887-5p       | 1043-1049 | 7mer-1A | -0.24 | 70 | -0.24 | 0     | N/A |
| hsa-miR-6751-5p       | 1044-1050 | 7mer-1A | -0.17 | 81 | -0.17 | 0     | N/A |
| hsa-miR-6803-5p       | 1044-1050 | 7mer-1A | -0.17 | 81 | -0.17 | 0     | N/A |
| hsa-miR-4665-5p       | 1044-1050 | 7mer-1A | -0.17 | 74 | -0.17 | 0.024 | N/A |
| hsa-miR-1275          | 1044-1050 | 7mer-1A | -0.08 | 65 | -0.08 | 0.024 | N/A |
| hsa-miR-5572          | 1045-1051 | 7mer-1A | -0.1  | 79 | -0.1  | 0     | N/A |
| hsa-miR-450a-2-3<br>p | 1045-1051 | 7mer-1A | -0.14 | 68 | -0.14 | 0.494 | N/A |
| hsa-miR-4260          | 1045-1051 | 7mer-1A | -0.04 | 48 | -0.04 | 0     | N/A |
| hsa-miR-4775          | 1049-1055 | 7mer-m8 | -0.02 | 47 | -0.02 | 0     | N/A |
| hsa-miR-590-3p        | 1049-1055 | 7mer-1A | -0.01 | 34 | -0.01 | 0.099 | N/A |
| hsa-miR-4735-5p       | 1050-1056 | 7mer-m8 | -0.02 | 33 | -0.02 | 0     | N/A |
| hsa-miR-3129-3p       | 1052-1058 | 7mer-m8 | -0.02 | 50 | -0.02 | 0     | N/A |
| hsa-miR-5583-5p       | 1052-1058 | 7mer-m8 | -0.02 | 49 | -0.02 | 0     | N/A |
| hsa-miR-587           | 1068-1074 | 7mer-m8 | -0.02 | 39 | -0.02 | 0.024 | N/A |
| hsa-miR-141-5p        | 1071-1078 | 8mer    | -0.14 | 85 | -0.14 | 0     | N/A |
| hsa-miR-4428          | 1083-1089 | 7mer-m8 | -0.11 | 80 | -0.11 | 0.024 | N/A |
| hsa-miR-548ao-5p      | 1090-1097 | 8mer    | -0.09 | 63 | -0.09 | 0.085 | N/A |
| hsa-miR-548ax         | 1090-1097 | 8mer    | -0.09 | 63 | -0.09 | 0.085 | N/A |

|                 |           |         |       |    |       |       |     |
|-----------------|-----------|---------|-------|----|-------|-------|-----|
| hsa-miR-5585-5p | 1091-1097 | 7mer-1A | -0.01 | 41 | -0.01 | 0     | N/A |
| hsa-miR-573     | 1096-1103 | 8mer    | -0.29 | 97 | -0.29 | 0     | N/A |
| hsa-miR-3616-5p | 1096-1103 | 8mer    | -0.25 | 96 | -0.25 | 0     | N/A |
| hsa-miR-4795-5p | 1096-1102 | 7mer-1A | -0.13 | 78 | -0.13 | 0     | N/A |
| hsa-miR-3140-3p | 1101-1107 | 7mer-m8 | -0.04 | 60 | -0.04 | 0     | N/A |
| hsa-miR-208a-5p | 1102-1108 | 7mer-m8 | -0.02 | 57 | -0.02 | 0.085 | N/A |
| hsa-miR-208b-5p | 1102-1108 | 7mer-m8 | -0.02 | 54 | -0.02 | 0.085 | N/A |
| hsa-miR-6869-5p | 1112-1118 | 7mer-1A | -0.02 | 47 | -0.02 | 0     | N/A |
| hsa-miR-8081    | 1113-1119 | 7mer-1A | -0.06 | 68 | -0.06 | 0     | N/A |
| hsa-miR-6750-5p | 1128-1134 | 7mer-m8 | -0.08 | 83 | -0.08 | 0     | N/A |
| hsa-miR-6822-5p | 1128-1134 | 7mer-m8 | -0.07 | 80 | -0.07 | 0     | N/A |
| hsa-miR-6797-5p | 1130-1137 | 8mer    | -0.13 | 72 | -0.13 | 0.085 | N/A |
| hsa-miR-1249-5p | 1130-1137 | 8mer    | -0.13 | 72 | -0.13 | 0.085 | N/A |
| hsa-miR-6515-5p | 1131-1137 | 7mer-m8 | -0.1  | 68 | -0.1  | 0     | N/A |
| hsa-miR-4254    | 1133-1139 | 7mer-m8 | -0.02 | 42 | -0.02 | 0     | N/A |
| hsa-miR-619-3p  | 1134-1140 | 7mer-m8 | -0.02 | 34 | -0.02 | 0.024 | N/A |
| hsa-miR-3661    | 1135-1142 | 8mer    | -0.12 | 68 | -0.12 | 0.099 | N/A |
| hsa-miR-631     | 1135-1142 | 8mer    | -0.13 | 67 | -0.13 | 0.099 | N/A |
| hsa-miR-486-3p  | 1144-1150 | 7mer-m8 | -0.06 | 34 | -0.06 | 0.085 | N/A |
| hsa-miR-4697-5p | 1146-1152 | 7mer-1A | -0.16 | 67 | -0.16 | 0     | N/A |
| hsa-miR-1237-5p | 1146-1152 | 7mer-1A | -0.15 | 66 | -0.15 | 0     | N/A |
| hsa-miR-4488    | 1146-1152 | 7mer-1A | -0.15 | 65 | -0.15 | 0     | N/A |
| hsa-miR-6848-5p | 1146-1152 | 7mer-1A | -0.13 | 57 | -0.13 | 0     | N/A |
| hsa-miR-6846-5p | 1146-1152 | 7mer-1A | -0.12 | 55 | -0.12 | 0     | N/A |
| hsa-miR-6803-5p | 1147-1153 | 7mer-1A | -0.15 | 76 | -0.15 | 0     | N/A |

|                       |           |         |       |    |       |       |     |
|-----------------------|-----------|---------|-------|----|-------|-------|-----|
| hsa-miR-6751-5p       | 1147-1153 | 7mer-1A | -0.11 | 71 | -0.11 | 0     | N/A |
| hsa-miR-7109-5p       | 1147-1153 | 7mer-1A | -0.13 | 69 | -0.13 | 0     | N/A |
| hsa-miR-1275          | 1147-1153 | 7mer-1A | -0.09 | 68 | -0.09 | 0.024 | N/A |
| hsa-miR-4665-5p       | 1147-1153 | 7mer-1A | -0.13 | 67 | -0.13 | 0.024 | N/A |
| hsa-miR-450a-2-3<br>p | 1148-1154 | 7mer-1A | -0.08 | 47 | -0.08 | 0     | N/A |
| hsa-miR-5572          | 1148-1154 | 7mer-1A | -0.01 | 26 | -0.01 | 0.312 | N/A |
| hsa-miR-4260          | 1148-1154 | 7mer-1A | -0.01 | 26 | -0.01 | 0     | N/A |
| hsa-miR-6740-5p       | 1149-1155 | 7mer-m8 | -0.02 | 25 | -0.02 | 0     | N/A |
| hsa-miR-193b-5p       | 1152-1158 | 7mer-m8 | -0.03 | 27 | -0.03 | 0     | N/A |
| hsa-miR-6732-5p       | 1154-1160 | 7mer-m8 | -0.21 | 85 | -0.21 | 0     | N/A |
| hsa-miR-4779          | 1157-1163 | 7mer-m8 | -0.11 | 79 | -0.11 | 0     | N/A |
| hsa-miR-6891-5p       | 1158-1165 | 8mer    | -0.03 | 49 | -0.03 | 0.024 | N/A |
| hsa-miR-3173-3p       | 1158-1165 | 8mer    | -0.03 | 48 | -0.03 | 0.024 | N/A |
| hsa-miR-4428          | 1159-1165 | 7mer-1A | -0.03 | 43 | -0.03 | 0.024 | N/A |
| hsa-miR-4504          | 1170-1177 | 8mer    | -0.03 | 37 | -0.03 | 0.024 | N/A |
| hsa-miR-542-3p        | 1171-1177 | 7mer-1A | -0.06 | 61 | -0.06 | 0.029 | N/A |
| hsa-miR-6818-5p       | 1173-1180 | 8mer    | -0.03 | 45 | -0.03 | 0     | N/A |
| hsa-miR-147a          | 1174-1180 | 7mer-1A | -0.01 | 54 | -0.01 | 0.024 | N/A |
| hsa-miR-5010-3p       | 1175-1182 | 8mer    | -0.03 | 62 | -0.03 | 0     | N/A |
| hsa-miR-2113          | 1176-1182 | 7mer-1A | -0.01 | 42 | -0.01 | 0     | N/A |
| hsa-miR-1910-3p       | 1189-1195 | 7mer-m8 | -0.02 | 49 | -0.02 | 0     | N/A |
| hsa-miR-6511a-5p      | 1189-1195 | 7mer-m8 | -0.02 | 38 | -0.02 | 0     | N/A |
| hsa-miR-3714          | 1190-1196 | 7mer-m8 | -0.02 | 49 | -0.02 | 0     | N/A |
| hsa-miR-3922-5p       | 1192-1198 | 7mer-1A | -0.01 | 34 | -0.01 | 0     | N/A |

|                       |           |         |       |    |       |       |          |
|-----------------------|-----------|---------|-------|----|-------|-------|----------|
| hsa-miR-5585-3p       | 1204-1211 | 8mer    | -0.03 | 64 | -0.03 | 0     | N/A      |
| hsa-miR-1273e         | 1208-1214 | 7mer-m8 | -0.04 | 46 | -0.04 | 0     | N/A      |
| hsa-miR-636           | 1209-1215 | 7mer-m8 | -0.11 | 74 | -0.11 | 0.085 | N/A      |
| hsa-miR-520f-3p       | 1210-1216 | 7mer-m8 | -0.08 | 76 | -0.08 | 0.22  | <<br>0.1 |
| hsa-miR-302c-3p.<br>2 | 1210-1216 | 7mer-m8 | -0.03 | 52 | -0.03 | 0.22  | <<br>0.1 |
| hsa-miR-373-3p        | 1211-1218 | 8mer    | -0.03 | 73 | -0.03 | 0.245 | <<br>0.1 |
| hsa-miR-520b          | 1211-1218 | 8mer    | -0.04 | 62 | -0.04 | 0.245 | <<br>0.1 |
| hsa-miR-520c-3p       | 1211-1218 | 8mer    | -0.04 | 62 | -0.04 | 0.245 | <<br>0.1 |
| hsa-miR-302e          | 1211-1218 | 8mer    | -0.03 | 61 | -0.03 | 0.245 | <<br>0.1 |
| hsa-miR-520e          | 1211-1218 | 8mer    | -0.03 | 60 | -0.03 | 0.245 | <<br>0.1 |
| hsa-miR-302c-3p.<br>1 | 1211-1218 | 8mer    | -0.03 | 59 | -0.03 | 0.245 | <<br>0.1 |
| hsa-miR-302d-3p       | 1211-1218 | 8mer    | -0.03 | 59 | -0.03 | 0.245 | <<br>0.1 |
| hsa-miR-520a-3p       | 1211-1218 | 8mer    | -0.03 | 59 | -0.03 | 0.245 | <<br>0.1 |
| hsa-miR-302a-3p       | 1211-1218 | 8mer    | -0.03 | 59 | -0.03 | 0.245 | <<br>0.1 |
| hsa-miR-520d-3p       | 1211-1218 | 8mer    | -0.03 | 59 | -0.03 | 0.245 | <        |

|                 |           |         |       |    |       |       |          |
|-----------------|-----------|---------|-------|----|-------|-------|----------|
|                 |           |         |       |    |       |       | 0.1      |
| hsa-miR-302b-3p | 1211-1218 | 8mer    | -0.03 | 59 | -0.03 | 0.245 | <<br>0.1 |
| hsa-miR-372-3p  | 1211-1218 | 8mer    | -0.03 | 57 | -0.03 | 0.245 | <<br>0.1 |
| hsa-miR-519a-3p | 1212-1218 | 7mer-1A | -0.12 | 81 | -0.12 | 0.099 | N/A      |
| hsa-miR-519b-3p | 1212-1218 | 7mer-1A | -0.12 | 81 | -0.12 | 0.099 | N/A      |
| hsa-miR-519c-3p | 1212-1218 | 7mer-1A | -0.12 | 81 | -0.12 | 0.099 | N/A      |
| hsa-miR-1537-5p | 1216-1222 | 7mer-m8 | -0.02 | 6  | -0.02 | 0     | N/A      |
| hsa-miR-4435    | 1224-1230 | 7mer-m8 | -0.12 | 76 | -0.12 | 0     | N/A      |
| hsa-miR-7108-5p | 1226-1233 | 8mer    | -0.09 | 78 | -0.09 | 0     | N/A      |
| hsa-miR-663b    | 1226-1232 | 7mer-1A | -0.02 | 41 | -0.02 | 0.024 | N/A      |
| hsa-miR-4474-3p | 1227-1233 | 7mer-1A | -0.03 | 35 | -0.03 | 0     | N/A      |
| hsa-miR-146b-3p | 1233-1240 | 8mer    | -0.12 | 84 | -0.12 | 0     | N/A      |
| hsa-miR-874-3p  | 1234-1240 | 7mer-m8 | -0.08 | 68 | -0.08 | 0.069 | N/A      |
| hsa-miR-7976    | 1234-1240 | 7mer-1A | -0.07 | 66 | -0.07 | 0     | N/A      |
| hsa-miR-3173-5p | 1234-1240 | 7mer-1A | -0.01 | 30 | -0.01 | 0     | N/A      |
| hsa-miR-6799-3p | 1234-1240 | 7mer-1A | -0.01 | 28 | -0.01 | 0     | N/A      |
| hsa-miR-365b-3p | 1236-1242 | 7mer-m8 | -0.08 | 73 | -0.08 | 0.069 | <<br>0.1 |
| hsa-miR-365a-3p | 1236-1242 | 7mer-m8 | -0.08 | 73 | -0.08 | 0.069 | <<br>0.1 |
| hsa-miR-3662    | 1239-1245 | 7mer-1A | -0.01 | 47 | -0.01 | 0     | N/A      |
| hsa-miR-3607-3p | 1242-1248 | 7mer-m8 | -0.02 | 46 | -0.02 | 0     | N/A      |
| hsa-miR-6804-3p | 1246-1252 | 7mer-m8 | -0.11 | 65 | -0.11 | 0     | N/A      |

|                  |           |         |       |    |       |       |          |
|------------------|-----------|---------|-------|----|-------|-------|----------|
| hsa-miR-1298-5p  | 1252-1258 | 7mer-m8 | -0.02 | 55 | -0.02 | 0.142 | N/A      |
| hsa-miR-616-3p   | 1254-1260 | 7mer-1A | -0.01 | 22 | -0.01 | 0.024 | N/A      |
| hsa-miR-215-3p   | 1255-1261 | 7mer-m8 | -0.02 | 47 | -0.02 | 0     | N/A      |
| hsa-miR-5089-3p  | 1260-1266 | 7mer-m8 | -0.07 | 55 | -0.07 | 0     | N/A      |
| hsa-miR-155-5p   | 1263-1269 | 7mer-m8 | -0.05 | 50 | -0.05 | 0.812 | <<br>0.1 |
| hsa-miR-3692-3p  | 1277-1283 | 7mer-m8 | -0.02 | 32 | -0.02 | 0.085 | N/A      |
| hsa-miR-4452     | 1281-1287 | 7mer-m8 | -0.02 | 66 | -0.02 | 0     | N/A      |
| hsa-miR-4680-3p  | 1282-1288 | 7mer-m8 | -0.02 | 47 | -0.02 | 0     | N/A      |
| hsa-miR-3140-5p  | 1283-1289 | 7mer-m8 | -0.03 | 57 | -0.03 | 0     | N/A      |
| hsa-miR-4699-3p  | 1291-1298 | 8mer    | -0.03 | 67 | -0.03 | 0     | N/A      |
| hsa-miR-1279     | 1295-1301 | 7mer-1A | -0.01 | 42 | -0.01 | 0     | N/A      |
| hsa-miR-5007-3p  | 1296-1302 | 7mer-1A | -0.01 | 36 | -0.01 | 0     | N/A      |
| hsa-miR-652-5p   | 1305-1311 | 7mer-m8 | -0.06 | 64 | -0.06 | 0     | N/A      |
| hsa-miR-6715a-3p | 1308-1314 | 7mer-1A | -0.11 | 80 | -0.11 | 0     | N/A      |
| hsa-miR-6715b-3p | 1308-1315 | 8mer    | -0.06 | 80 | -0.06 | 0     | N/A      |
| hsa-miR-607      | 1310-1316 | 7mer-1A | -0.01 | 40 | -0.01 | 0     | N/A      |
| hsa-miR-4422     | 1323-1329 | 7mer-m8 | -0.02 | 57 | -0.02 | 0     | N/A      |
| hsa-miR-3611     | 1328-1334 | 7mer-1A | -0.05 | 64 | -0.05 | 0     | N/A      |
| hsa-miR-409-3p   | 1332-1338 | 7mer-m8 | -0.02 | 71 | -0.02 | 0.245 | N/A      |
| hsa-miR-4772-3p  | 1338-1344 | 7mer-1A | -0.04 | 72 | -0.04 | 0     | N/A      |
| hsa-miR-2276-3p  | 1338-1344 | 7mer-1A | -0.04 | 69 | -0.04 | 0     | N/A      |
| hsa-miR-4799-5p  | 1348-1354 | 7mer-1A | -0.01 | 35 | -0.01 | 0     | N/A      |
| hsa-miR-1248     | 1351-1357 | 7mer-1A | -0.08 | 77 | -0.08 | 0.024 | N/A      |
| hsa-miR-6868-3p  | 1351-1358 | 8mer    | -0.09 | 76 | -0.09 | 0     | N/A      |

|                 |           |         |       |    |       |       |     |
|-----------------|-----------|---------|-------|----|-------|-------|-----|
| hsa-miR-1237-3p | 1351-1357 | 7mer-1A | -0.06 | 67 | -0.06 | 0.024 | N/A |
| hsa-miR-1252-5p | 1364-1370 | 7mer-m8 | -0.02 | 20 | -0.02 | 0.024 | N/A |
| hsa-miR-4533    | 1365-1371 | 7mer-m8 | -0.06 | 62 | -0.06 | 0     | N/A |
| hsa-miR-6876-5p | 1366-1373 | 8mer    | -0.1  | 80 | -0.1  | 0     | N/A |
| hsa-miR-4476    | 1366-1373 | 8mer    | -0.1  | 80 | -0.1  | 0     | N/A |
| hsa-miR-651-5p  | 1369-1375 | 7mer-1A | -0.02 | 39 | -0.02 | 0.024 | N/A |
| hsa-miR-944     | 1375-1381 | 7mer-m8 | -0.02 | 56 | -0.02 | 0.099 | N/A |
| hsa-miR-539-5p  | 1379-1385 | 7mer-m8 | -0.02 | 65 | -0.02 | 0.099 | N/A |
| hsa-miR-3925-5p | 1381-1387 | 7mer-1A | -0.02 | 71 | -0.02 | 0     | N/A |
| hsa-miR-3123    | 1381-1387 | 7mer-1A | -0.03 | 70 | -0.03 | 0     | N/A |
| hsa-miR-6832-5p | 1382-1389 | 8mer    | -0.19 | 81 | -0.19 | 0     | N/A |
| hsa-miR-4732-5p | 1383-1389 | 7mer-1A | -0.13 | 86 | -0.13 | 0     | N/A |
| hsa-miR-3674    | 1384-1390 | 7mer-m8 | -0.03 | 25 | -0.03 | 0     | N/A |
| hsa-miR-141-5p  | 1393-1399 | 7mer-m8 | -0.09 | 76 | -0.09 | 0     | N/A |
| hsa-miR-141-5p  | 1401-1407 | 7mer-m8 | -0.09 | 76 | -0.09 | 0     | N/A |
| hsa-miR-5187-3p | 1405-1411 | 7mer-m8 | -0.06 | 78 | -0.06 | 0     | N/A |
| hsa-miR-4661-5p | 1410-1416 | 7mer-m8 | -0.09 | 59 | -0.09 | 0     | N/A |
| hsa-miR-708-3p  | 1412-1418 | 7mer-1A | -0.04 | 49 | -0.04 | 0.085 | N/A |
| hsa-miR-4674    | 1420-1426 | 7mer-m8 | -0.11 | 78 | -0.11 | 0     | N/A |
| hsa-miR-4437    | 1420-1426 | 7mer-1A | -0.08 | 52 | -0.08 | 0     | N/A |
| hsa-miR-4417    | 1421-1427 | 7mer-m8 | -0.03 | 40 | -0.03 | 0     | N/A |
| hsa-miR-654-5p  | 1422-1428 | 7mer-m8 | -0.23 | 91 | -0.23 | 0     | N/A |
| hsa-miR-541-3p  | 1422-1428 | 7mer-m8 | -0.21 | 89 | -0.21 | 0     | N/A |
| hsa-miR-3148    | 1430-1436 | 7mer-m8 | -0.02 | 38 | -0.02 | 0     | N/A |
| hsa-miR-4496    | 1432-1438 | 7mer-1A | -0.01 | 64 | -0.01 | 0     | N/A |

|                 |           |         |       |    |       |       |          |
|-----------------|-----------|---------|-------|----|-------|-------|----------|
| hsa-miR-8485    | 1442-1448 | 7mer-m8 | -0.02 | 19 | -0.02 | 0     | N/A      |
| hsa-miR-7151-3p | 1451-1457 | 7mer-1A | -0.01 | 27 | -0.01 | 0     | N/A      |
| hsa-miR-5095    | 1451-1457 | 7mer-1A | -0.01 | 26 | -0.01 | 0     | N/A      |
| hsa-miR-1288-3p | 1473-1479 | 7mer-m8 | -0.19 | 85 | -0.19 | 0.024 | N/A      |
| hsa-miR-3169    | 1474-1480 | 7mer-m8 | -0.08 | 68 | -0.08 | 0     | N/A      |
| hsa-miR-520d-5p | 1479-1486 | 8mer    | -0.03 | 80 | -0.03 | 0     | N/A      |
| hsa-miR-524-5p  | 1479-1486 | 8mer    | -0.03 | 78 | -0.03 | 0     | N/A      |
| hsa-miR-452-5p  | 1485-1491 | 7mer-m8 | -0.04 | 63 | -0.04 | 0.811 | N/A      |
| hsa-miR-4676-3p | 1485-1491 | 7mer-m8 | -0.03 | 54 | -0.03 | 0.811 | N/A      |
| hsa-miR-892c-3p | 1485-1491 | 7mer-m8 | -0.02 | 37 | -0.02 | 0.811 | N/A      |
| hsa-miR-1208    | 1486-1492 | 7mer-m8 | -0.11 | 87 | -0.11 | 0.024 | N/A      |
| hsa-miR-141-3p  | 1488-1494 | 7mer-m8 | -0.11 | 83 | -0.11 | 1.291 | <<br>0.1 |
| hsa-miR-200a-3p | 1488-1494 | 7mer-m8 | -0.09 | 79 | -0.09 | 1.291 | <<br>0.1 |
| hsa-miR-5192    | 1499-1505 | 7mer-m8 | -0.19 | 93 | -0.19 | 0     | N/A      |
| hsa-miR-6888-5p | 1501-1507 | 7mer-1A | -0.01 | 34 | -0.01 | 0     | N/A      |
| hsa-miR-4791    | 1512-1518 | 7mer-1A | -0.08 | 59 | -0.08 | 0     | N/A      |
| hsa-miR-3201    | 1512-1518 | 7mer-1A | -0.01 | 26 | -0.01 | 0     | N/A      |
| hsa-miR-376b-5p | 1513-1519 | 7mer-m8 | -0.09 | 60 | -0.09 | 0     | N/A      |
| hsa-miR-376c-5p | 1513-1519 | 7mer-m8 | -0.04 | 50 | -0.04 | 0     | N/A      |
| hsa-miR-3165    | 1514-1520 | 7mer-m8 | -0.12 | 79 | -0.12 | 0.024 | N/A      |
| hsa-miR-6745    | 1515-1521 | 7mer-m8 | -0.17 | 81 | -0.17 | 0     | N/A      |
| hsa-miR-363-5p  | 1515-1521 | 7mer-m8 | -0.16 | 80 | -0.16 | 0     | N/A      |
| hsa-miR-608     | 1516-1523 | 8mer    | -0.32 | 89 | -0.32 | 0     | N/A      |

|                  |           |         |       |    |       |       |     |
|------------------|-----------|---------|-------|----|-------|-------|-----|
| hsa-miR-4651     | 1516-1523 | 8mer    | -0.3  | 88 | -0.3  | 0     | N/A |
| hsa-miR-6819-5p  | 1517-1523 | 7mer-m8 | -0.19 | 82 | -0.19 | 0     | N/A |
| hsa-miR-6737-5p  | 1517-1523 | 7mer-m8 | -0.18 | 81 | -0.18 | 0     | N/A |
| hsa-miR-6812-5p  | 1517-1523 | 7mer-m8 | -0.18 | 79 | -0.18 | 0     | N/A |
| hsa-miR-342-5p   | 1517-1523 | 7mer-1A | -0.09 | 68 | -0.09 | 0     | N/A |
| hsa-miR-6747-5p  | 1517-1523 | 7mer-1A | -0.09 | 65 | -0.09 | 0     | N/A |
| hsa-miR-4664-5p  | 1517-1523 | 7mer-1A | -0.03 | 46 | -0.03 | 0     | N/A |
| hsa-miR-6890-5p  | 1518-1524 | 7mer-m8 | -0.1  | 71 | -0.1  | 0     | N/A |
| hsa-miR-432-3p   | 1521-1528 | 8mer    | -0.3  | 95 | -0.3  | 0     | N/A |
| hsa-miR-3161     | 1530-1536 | 7mer-1A | -0.01 | 39 | -0.01 | 0     | N/A |
| hsa-miR-599      | 1530-1536 | 7mer-m8 | -0.02 | 23 | -0.02 | 1.63  | N/A |
| hsa-miR-502-5p   | 1534-1540 | 7mer-1A | -0.04 | 62 | -0.04 | 0.099 | N/A |
| hsa-miR-6875-3p  | 1537-1544 | 8mer    | -0.06 | 75 | -0.06 | 0     | N/A |
| hsa-miR-4659b-3p | 1538-1544 | 7mer-1A | -0.01 | 24 | -0.01 | 0     | N/A |
| hsa-miR-4659a-3p | 1538-1544 | 7mer-1A | -0.01 | 24 | -0.01 | 0     | N/A |
| hsa-miR-4539     | 1547-1553 | 7mer-1A | -0.01 | 32 | -0.01 | 0     | N/A |
| hsa-miR-4762-3p  | 1549-1555 | 7mer-1A | -0.03 | 61 | -0.03 | 0     | N/A |
| hsa-miR-4419b    | 1562-1569 | 8mer    | -0.09 | 93 | -0.09 | 0     | N/A |
| hsa-miR-3929     | 1562-1569 | 8mer    | -0.08 | 92 | -0.08 | 0     | N/A |
| hsa-miR-4478     | 1562-1569 | 8mer    | -0.07 | 89 | -0.07 | 0     | N/A |
| hsa-miR-6806-5p  | 1565-1571 | 7mer-1A | -0.16 | 55 | -0.16 | 0     | N/A |
| hsa-miR-1183     | 1567-1573 | 7mer-m8 | -0.06 | 67 | -0.06 | 0.099 | N/A |
| hsa-miR-4803     | 1573-1579 | 7mer-m8 | -0.02 | 41 | -0.02 | 0.085 | N/A |
| hsa-miR-4724-5p  | 1577-1583 | 7mer-m8 | -0.09 | 88 | -0.09 | 0     | N/A |
| hsa-miR-6855-3p  | 1579-1585 | 7mer-1A | -0.11 | 78 | -0.11 | 0     | N/A |

|                   |           |               |       |     |       |       |     |
|-------------------|-----------|---------------|-------|-----|-------|-------|-----|
| hsa-miR-4513      | 1579-1585 | 7mer-1A       | -0.1  | 76  | -0.1  | 0     | N/A |
| hsa-miR-3136-5p   | 1579-1585 | 7mer-m8       | -0.1  | 74  | -0.1  | 0.024 | N/A |
| hsa-miR-6857-3p   | 1579-1585 | 7mer-1A       | -0.07 | 57  | -0.07 | 0     | N/A |
| hsa-miR-4439      | 1579-1585 | 7mer-m8       | -0.02 | 44  | -0.02 | 0.024 | N/A |
| hsa-miR-134-5p    | 1580-1587 | 8mer          | -0.24 | 92  | -0.24 | 0.245 | N/A |
| hsa-miR-3118      | 1580-1587 | 8mer          | -0.24 | 91  | -0.24 | 0.245 | N/A |
| hsa-miR-6820-3p   | 1581-1587 | 7mer-1A       | -0.05 | 52  | -0.05 | 0     | N/A |
| hsa-miR-3164      | 1581-1587 | 7mer-1A       | -0.02 | 34  | -0.02 | 0     | N/A |
| hsa-miR-6818-5p   | 1583-1589 | 7mer-m8       | -0.04 | 53  | -0.04 | 0     | N/A |
| hsa-miR-6867-5p   | 1584-1591 | 8mer          | -0.13 | 57  | -0.13 | 0     | N/A |
| hsa-miR-6867-5p   | 1586-1593 | 8mer          | -0.15 | 64  | -0.15 | 0     | N/A |
| hsa-miR-511-3p    | 1589-1595 | 7mer-1A       | -0.05 | 56  | -0.05 | 0.085 | N/A |
| hsa-miR-297       | 1591-1598 | 8mer          | -0.06 | 62  | -0.06 | 0.085 | N/A |
| hsa-miR-567       | 1591-1597 | 7mer-1A       | -0.04 | 43  | -0.04 | 0     | N/A |
| hsa-miR-3149      | 1592-1599 | 8mer          | -0.03 | 60  | -0.03 | 0     | N/A |
| hsa-miR-675-3p    | 1592-1598 | 7mer-1A       | -0.02 | 48  | -0.02 | 0.085 | N/A |
| hsa-miR-450a-1-3p | 1596-1607 | non-canonical | N/A   | N/A | N/A   | 0     | N/A |
| hsa-miR-450a-1-3p | 1596-1607 | non-canonical | N/A   | N/A | N/A   | 0     | N/A |
| hsa-miR-548f-5p   | 1606-1612 | 7mer-m8       | -0.05 | 75  | -0.05 | 0     | N/A |
| hsa-miR-548x-5p   | 1606-1612 | 7mer-m8       | -0.04 | 70  | -0.04 | 0     | N/A |
| hsa-miR-548aj-5p  | 1606-1612 | 7mer-m8       | -0.04 | 70  | -0.04 | 0     | N/A |
| hsa-miR-548g-5p   | 1606-1612 | 7mer-m8       | -0.04 | 70  | -0.04 | 0     | N/A |
| hsa-miR-548p      | 1607-1613 | 7mer-m8       | -0.02 | 40  | -0.02 | 0.024 | N/A |

|                 |           |         |       |    |       |       |     |
|-----------------|-----------|---------|-------|----|-------|-------|-----|
| hsa-miR-548e-5p | 1610-1617 | 8mer    | -0.03 | 67 | -0.03 | 0     | N/A |
| hsa-miR-3613-3p | 1624-1630 | 7mer-1A | -0.01 | 26 | -0.01 | 0     | N/A |
| hsa-miR-3192-5p | 1631-1638 | 8mer    | -0.09 | 78 | -0.09 | 0.024 | N/A |
| hsa-miR-6506-5p | 1632-1638 | 7mer-1A | -0.09 | 87 | -0.09 | 0     | N/A |
| hsa-miR-204-3p  | 1632-1638 | 7mer-1A | -0.04 | 74 | -0.04 | 0     | N/A |
| hsa-miR-619-5p  | 1632-1638 | 7mer-1A | -0.02 | 73 | -0.02 | 0     | N/A |
| hsa-miR-4646-5p | 1632-1638 | 7mer-1A | -0.05 | 62 | -0.05 | 0     | N/A |
| hsa-miR-4314    | 1632-1638 | 7mer-m8 | -0.06 | 50 | -0.06 | 0     | N/A |
| hsa-miR-1298-3p | 1633-1639 | 7mer-m8 | -0.04 | 51 | -0.04 | 0.085 | N/A |
| hsa-miR-4513    | 1639-1645 | 7mer-1A | -0.1  | 75 | -0.1  | 0     | N/A |
| hsa-miR-6855-3p | 1639-1645 | 7mer-1A | -0.04 | 51 | -0.04 | 0     | N/A |
| hsa-miR-4439    | 1639-1645 | 7mer-m8 | -0.02 | 34 | -0.02 | 0.024 | N/A |
| hsa-miR-6857-3p | 1639-1645 | 7mer-1A | -0.03 | 32 | -0.03 | 0     | N/A |
| hsa-miR-3136-5p | 1639-1645 | 7mer-m8 | -0.02 | 24 | -0.02 | 0.024 | N/A |
| hsa-miR-345-5p  | 1641-1647 | 7mer-1A | -0.01 | 44 | -0.01 | 0.024 | N/A |
| hsa-miR-301b-5p | 1642-1648 | 7mer-m8 | -0.02 | 68 | -0.02 | 0     | N/A |
| hsa-miR-301a-5p | 1642-1648 | 7mer-m8 | -0.02 | 68 | -0.02 | 0     | N/A |
| hsa-miR-760     | 1644-1650 | 7mer-m8 | -0.1  | 62 | -0.1  | 0.069 | N/A |
| hsa-miR-4283    | 1646-1652 | 7mer-m8 | -0.23 | 88 | -0.23 | 0     | N/A |
| hsa-miR-6813-5p | 1647-1654 | 8mer    | -0.2  | 88 | -0.2  | 0     | N/A |
| hsa-miR-6085    | 1647-1654 | 8mer    | -0.2  | 86 | -0.2  | 0     | N/A |
| hsa-miR-6743-5p | 1648-1654 | 7mer-1A | -0.18 | 82 | -0.18 | 0     | N/A |
| hsa-miR-4688    | 1648-1654 | 7mer-1A | -0.17 | 79 | -0.17 | 0     | N/A |
| hsa-miR-6789-5p | 1648-1654 | 7mer-m8 | -0.15 | 78 | -0.15 | 0     | N/A |
| hsa-miR-135b-3p | 1650-1656 | 7mer-m8 | -0.05 | 43 | -0.05 | 0.085 | N/A |

|                  |           |         |       |    |       |       |     |
|------------------|-----------|---------|-------|----|-------|-------|-----|
| hsa-miR-1537-5p  | 1653-1659 | 7mer-1A | -0.1  | 53 | -0.1  | 0     | N/A |
| hsa-miR-4718     | 1653-1659 | 7mer-1A | -0.01 | 17 | -0.01 | 0     | N/A |
| hsa-miR-4999-5p  | 1653-1659 | 7mer-1A | -0.01 | 10 | -0.01 | 0     | N/A |
| hsa-miR-3671     | 1672-1678 | 7mer-m8 | -0.02 | 41 | -0.02 | 0     | N/A |
| hsa-miR-551b-5p  | 1675-1681 | 7mer-m8 | -0.02 | 62 | -0.02 | 0.085 | N/A |
| hsa-miR-548c-3p  | 1677-1683 | 7mer-m8 | -0.02 | 84 | -0.02 | 0.024 | N/A |
| hsa-miR-4524a-3p | 1683-1689 | 7mer-1A | -0.05 | 55 | -0.05 | 0.024 | N/A |
| hsa-miR-3672     | 1684-1690 | 7mer-1A | -0.09 | 80 | -0.09 | 0     | N/A |
| hsa-miR-6864-3p  | 1684-1690 | 7mer-1A | -0.02 | 51 | -0.02 | 0     | N/A |
| hsa-miR-4461     | 1685-1691 | 7mer-m8 | -0.02 | 29 | -0.02 | 0     | N/A |
| hsa-miR-335-3p   | 1690-1696 | 7mer-m8 | -0.02 | 61 | -0.02 | 0.085 | N/A |
| hsa-miR-3646     | 1707-1713 | 7mer-m8 | -0.02 | 48 | -0.02 | 0     | N/A |
| hsa-miR-5093     | 1709-1716 | 8mer    | -0.06 | 71 | -0.06 | 0     | N/A |
| hsa-miR-5586-3p  | 1715-1721 | 7mer-1A | -0.08 | 70 | -0.07 | 0     | N/A |
| hsa-miR-503-3p   | 1733-1739 | 7mer-m8 | -0.03 | 34 | -0.03 | 0     | N/A |
| hsa-miR-6782-5p  | 1736-1742 | 7mer-1A | -0.18 | 75 | -0.17 | 0     | N/A |
| hsa-miR-4278     | 1737-1743 | 7mer-1A | -0.18 | 68 | -0.17 | 0     | N/A |
| hsa-miR-6824-5p  | 1737-1743 | 7mer-1A | -0.13 | 65 | -0.13 | 0     | N/A |
| hsa-miR-6789-5p  | 1737-1743 | 7mer-1A | -0.05 | 50 | -0.04 | 0     | N/A |
| hsa-miR-1911-3p  | 1756-1763 | 8mer    | -0.25 | 92 | -0.23 | 0     | N/A |
| hsa-miR-6753-5p  | 1757-1763 | 7mer-1A | -0.06 | 57 | -0.06 | 0     | N/A |
| hsa-miR-660-5p   | 1763-1769 | 7mer-1A | -0.03 | 38 | -0.03 | 0.099 | N/A |
| hsa-miR-5591-3p  | 1763-1769 | 7mer-m8 | -0.02 | 28 | -0.02 | 0     | N/A |
| hsa-miR-485-3p   | 1767-1773 | 7mer-1A | -0.01 | 18 | -0.01 | 0.099 | N/A |
| hsa-miR-539-3p   | 1767-1773 | 7mer-1A | -0.02 | 12 | -0.02 | 0.099 | N/A |

|                 |           |         |       |    |       |       |     |
|-----------------|-----------|---------|-------|----|-------|-------|-----|
| hsa-miR-3149    | 1776-1782 | 7mer-1A | -0.01 | 28 | -0.01 | 0.024 | N/A |
| hsa-miR-6844    | 1778-1784 | 7mer-m8 | -0.06 | 74 | -0.05 | 0     | N/A |
| hsa-miR-4307    | 1790-1797 | 8mer    | -0.03 | 66 | -0.03 | 0     | N/A |
| hsa-miR-211-3p  | 1798-1805 | 8mer    | -0.16 | 94 | -0.15 | 0     | N/A |
| hsa-miR-6754-5p | 1799-1805 | 7mer-1A | -0.14 | 83 | -0.13 | 0     | N/A |
| hsa-miR-4441    | 1799-1805 | 7mer-1A | -0.11 | 77 | -0.1  | 0     | N/A |
| hsa-miR-4270    | 1799-1805 | 7mer-1A | -0.03 | 46 | -0.02 | 0     | N/A |
| hsa-miR-1257    | 1815-1821 | 7mer-1A | -0.08 | 63 | -0.08 | 0     | N/A |
| hsa-miR-3611    | 1816-1822 | 7mer-1A | -0.08 | 77 | -0.08 | 0     | N/A |
| hsa-miR-4639-5p | 1824-1830 | 7mer-1A | -0.06 | 67 | -0.06 | 0     | N/A |
| hsa-miR-3121-5p | 1827-1834 | 8mer    | -0.13 | 87 | -0.13 | 0     | N/A |
| hsa-miR-7856-5p | 1855-1862 | 8mer    | -0.03 | 76 | -0.03 | 0     | N/A |
| hsa-miR-4477b   | 1855-1861 | 7mer-1A | -0.08 | 65 | -0.07 | 0     | N/A |
| hsa-miR-1256    | 1873-1879 | 7mer-1A | -0.07 | 55 | -0.07 | 0.024 | N/A |
| hsa-miR-4720-5p | 1874-1881 | 8mer    | -0.09 | 77 | -0.08 | 0     | N/A |
| hsa-miR-5588-5p | 1874-1881 | 8mer    | -0.08 | 75 | -0.08 | 0     | N/A |
| hsa-miR-4799-3p | 1874-1881 | 8mer    | -0.08 | 75 | -0.08 | 0     | N/A |
| hsa-miR-6868-5p | 1875-1881 | 7mer-1A | -0.13 | 78 | -0.12 | 0     | N/A |
| hsa-miR-3128    | 1875-1881 | 7mer-1A | -0.06 | 63 | -0.06 | 0.437 | N/A |
| hsa-miR-1231    | 1877-1883 | 7mer-m8 | -0.02 | 51 | -0.02 | 0     | N/A |
| hsa-miR-3120-5p | 1878-1884 | 7mer-m8 | -0.02 | 47 | -0.02 | 0     | N/A |
| hsa-miR-5699-3p | 1879-1886 | 8mer    | -0.03 | 43 | -0.03 | 0     | N/A |
| hsa-miR-4421    | 1879-1886 | 8mer    | -0.03 | 40 | -0.03 | 0     | N/A |
| hsa-miR-6748-3p | 1880-1886 | 7mer-1A | -0.01 | 31 | -0.01 | 0     | N/A |
| hsa-miR-8075    | 1889-1895 | 7mer-m8 | -0.02 | 26 | -0.02 | 0     | N/A |

|                   |           |         |       |    |       |       |      |
|-------------------|-----------|---------|-------|----|-------|-------|------|
| hsa-miR-3064-5p   | 1892-1898 | 7mer-m8 | -0.05 | 60 | -0.05 | 1.171 | 0.18 |
| hsa-miR-6504-5p   | 1892-1898 | 7mer-m8 | -0.03 | 47 | -0.03 | 1.171 | 0.18 |
| hsa-miR-1254      | 1895-1901 | 7mer-1A | -0.09 | 72 | -0.08 | 0.024 | N/A  |
| hsa-miR-3116      | 1895-1901 | 7mer-1A | -0.05 | 58 | -0.05 | 0.024 | N/A  |
| hsa-miR-661       | 1895-1901 | 7mer-1A | -0.02 | 26 | -0.02 | 0.099 | N/A  |
| hsa-miR-550a-5p   | 1896-1902 | 7mer-m8 | -0.02 | 17 | -0.02 | 0.099 | N/A  |
| hsa-miR-550a-3-5p | 1896-1902 | 7mer-m8 | -0.02 | 17 | -0.02 | 0.099 | N/A  |
| hsa-miR-1271-3p   | 1896-1902 | 7mer-m8 | -0.02 | 16 | -0.02 | 0.099 | N/A  |
| hsa-miR-515-3p    | 1897-1903 | 7mer-m8 | -0.02 | 35 | -0.02 | 0.024 | N/A  |
| hsa-miR-33b-3p    | 1897-1903 | 7mer-m8 | -0.02 | 23 | -0.02 | 0.024 | N/A  |
| hsa-miR-519e-3p   | 1897-1903 | 7mer-m8 | -0.02 | 21 | -0.02 | 0.024 | N/A  |
| hsa-miR-128-3p    | 1900-1907 | 8mer    | -0.03 | 56 | -0.03 | 1.013 | <0.1 |
| hsa-miR-216a-3p   | 1900-1907 | 8mer    | -0.03 | 54 | -0.03 | 1.013 | <0.1 |
| hsa-miR-3681-3p   | 1900-1907 | 8mer    | -0.03 | 53 | -0.03 | 1.013 | <0.1 |
| hsa-miR-27a-3p    | 1901-1907 | 7mer-m8 | -0.02 | 47 | -0.02 | 1.013 | <0.1 |
| hsa-miR-27b-3p    | 1901-1907 | 7mer-m8 | -0.02 | 46 | -0.02 | 1.013 | <0.1 |
| hsa-miR-342-3p    | 1903-1909 | 7mer-1A | -0.01 | 39 | -0.01 | 0.379 | N/A  |
| hsa-miR-6737-3p   | 1909-1916 | 8mer    | -0.03 | 49 | -0.03 | 0.437 | N/A  |

|                  |           |         |       |    |       |       |     |
|------------------|-----------|---------|-------|----|-------|-------|-----|
| hsa-miR-7157-3p  | 1909-1916 | 8mer    | -0.03 | 49 | -0.03 | 0.437 | N/A |
| hsa-miR-5008-3p  | 1909-1916 | 8mer    | -0.03 | 49 | -0.03 | 0.437 | N/A |
| hsa-miR-6889-3p  | 1910-1916 | 7mer-1A | -0.01 | 31 | -0.01 | 0.489 | N/A |
| hsa-miR-6805-3p  | 1913-1919 | 7mer-m8 | -0.02 | 38 | -0.02 | 0     | N/A |
| hsa-miR-5691     | 1913-1919 | 7mer-m8 | -0.02 | 35 | -0.02 | 0     | N/A |
| hsa-miR-3194-3p  | 1913-1919 | 7mer-1A | -0.01 | 30 | -0.01 | 0     | N/A |
| hsa-miR-6752-3p  | 1917-1923 | 7mer-1A | -0.01 | 27 | -0.01 | 0     | N/A |
| hsa-miR-7113-3p  | 1918-1924 | 7mer-m8 | -0.02 | 38 | -0.02 | 0     | N/A |
| hsa-miR-711      | 1927-1933 | 7mer-m8 | -0.02 | 20 | -0.02 | 0.099 | N/A |
| hsa-miR-1286     | 1930-1936 | 7mer-m8 | -0.02 | 48 | -0.02 | 0.024 | N/A |
| hsa-miR-6893-5p  | 1932-1938 | 7mer-m8 | -0.02 | 43 | -0.02 | 0.099 | N/A |
| hsa-miR-6808-5p  | 1932-1938 | 7mer-m8 | -0.02 | 43 | -0.02 | 0.099 | N/A |
| hsa-miR-940      | 1932-1938 | 7mer-m8 | -0.02 | 43 | -0.02 | 0.099 | N/A |
| hsa-miR-4692     | 1933-1940 | 8mer    | -0.03 | 54 | -0.03 | 0     | N/A |
| hsa-miR-4514     | 1933-1940 | 8mer    | -0.03 | 54 | -0.03 | 0     | N/A |
| hsa-miR-4269     | 1934-1940 | 7mer-1A | -0.01 | 54 | -0.01 | 0     | N/A |
| hsa-miR-6715b-5p | 1934-1940 | 7mer-1A | -0.01 | 45 | -0.01 | 0     | N/A |
| hsa-miR-4742-5p  | 1934-1940 | 7mer-1A | -0.01 | 25 | -0.01 | 0.024 | N/A |
| hsa-miR-4279     | 1939-1945 | 7mer-m8 | -0.02 | 57 | -0.02 | 0     | N/A |
| hsa-miR-5088-3p  | 1950-1956 | 7mer-1A | -0.01 | 23 | -0.01 | 0     | N/A |
| hsa-miR-4287     | 1951-1957 | 7mer-m8 | -0.02 | 47 | -0.02 | 0     | N/A |
| hsa-miR-4685-3p  | 1951-1957 | 7mer-m8 | -0.02 | 45 | -0.02 | 0     | N/A |
| hsa-miR-6778-3p  | 1953-1959 | 7mer-m8 | -0.02 | 32 | -0.02 | 0     | N/A |
| hsa-miR-6089     | 1957-1963 | 7mer-1A | -0.01 | 39 | -0.01 | 0     | N/A |
| hsa-miR-5008-5p  | 1957-1963 | 7mer-1A | -0.01 | 29 | -0.01 | 0     | N/A |

|                 |           |         |       |    |       |       |       |
|-----------------|-----------|---------|-------|----|-------|-------|-------|
| hsa-miR-4316    | 1958-1965 | 8mer    | -0.03 | 58 | -0.03 | 0     | N/A   |
| hsa-miR-1294    | 1959-1965 | 7mer-1A | -0.01 | 17 | -0.01 | 0.024 | N/A   |
| hsa-miR-4677-3p | 1960-1966 | 7mer-m8 | -0.02 | 40 | -0.02 | 0.085 | N/A   |
| hsa-miR-1914-5p | 1962-1968 | 7mer-1A | -0.02 | 56 | -0.02 | 0     | N/A   |
| hsa-miR-660-3p  | 1964-1971 | 8mer    | -0.03 | 43 | -0.03 | 0.085 | N/A   |
| hsa-miR-5193    | 1965-1971 | 7mer-1A | -0.01 | 34 | -0.01 | 0     | N/A   |
| hsa-miR-5196-3p | 1967-1974 | 8mer    | -0.03 | 59 | -0.03 | 0     | N/A   |
| hsa-miR-4793-5p | 1968-1974 | 7mer-1A | -0.01 | 27 | -0.01 | 0     | N/A   |
| hsa-miR-631     | 1975-1981 | 7mer-m8 | -0.05 | 39 | -0.04 | 0.099 | N/A   |
| hsa-miR-3661    | 1975-1981 | 7mer-m8 | -0.02 | 28 | -0.02 | 0.099 | N/A   |
| hsa-miR-769-5p  | 1977-1984 | 8mer    | -0.03 | 48 | -0.03 | 0.085 | N/A   |
| hsa-miR-4786-5p | 1978-1984 | 7mer-1A | -0.01 | 10 | -0.01 | 0     | N/A   |
| hsa-miR-4329    | 1979-1985 | 7mer-m8 | -0.02 | 58 | -0.02 | 0     | N/A   |
| hsa-miR-6857-3p | 1981-1988 | 8mer    | -0.03 | 36 | -0.03 | 0     | N/A   |
| hsa-miR-4439    | 1982-1988 | 7mer-m8 | -0.02 | 34 | -0.02 | 0.024 | N/A   |
| hsa-miR-6855-3p | 1982-1988 | 7mer-1A | -0.01 | 26 | -0.01 | 0     | N/A   |
| hsa-miR-4513    | 1982-1988 | 7mer-1A | -0.01 | 25 | -0.01 | 0     | N/A   |
| hsa-miR-3136-5p | 1982-1988 | 7mer-m8 | -0.02 | 24 | -0.02 | 0.024 | N/A   |
| hsa-miR-6825-3p | 1985-1991 | 7mer-m8 | -0.08 | 58 | -0.07 | 0     | N/A   |
| hsa-miR-1306-5p | 1993-1999 | 7mer-m8 | -0.02 | 44 | -0.02 | 0.436 | < 0.1 |
| hsa-miR-3692-3p | 1997-2003 | 7mer-1A | -0.01 | 23 | -0.01 | 0.085 | N/A   |
| hsa-miR-4325    | 2002-2008 | 7mer-m8 | -0.02 | 44 | -0.02 | 0     | N/A   |
| hsa-miR-4793-3p | 2003-2009 | 7mer-m8 | -0.02 | 36 | -0.02 | 0     | N/A   |
| hsa-miR-6804-3p | 2007-2014 | 8mer    | -0.06 | 47 | -0.05 | 0     | N/A   |

|                  |           |         |       |    |       |       |     |
|------------------|-----------|---------|-------|----|-------|-------|-----|
| hsa-miR-500a-3p  | 2008-2014 | 7mer-m8 | -0.02 | 24 | -0.02 | 0.085 | N/A |
| hsa-miR-502-3p   | 2009-2015 | 7mer-m8 | -0.02 | 34 | -0.02 | 0.046 | N/A |
| hsa-miR-501-3p   | 2009-2015 | 7mer-m8 | -0.02 | 34 | -0.02 | 0.046 | N/A |
| hsa-miR-210-5p   | 2016-2023 | 8mer    | -0.1  | 64 | -0.1  | 0.085 | N/A |
| hsa-miR-4749-3p  | 2017-2023 | 7mer-1A | -0.01 | 25 | -0.01 | 0     | N/A |
| hsa-miR-6823-5p  | 2023-2029 | 7mer-1A | -0.01 | 26 | -0.01 | 0     | N/A |
| hsa-miR-1238-3p  | 2031-2038 | 8mer    | -0.03 | 61 | -0.03 | 0     | N/A |
| hsa-miR-670-3p   | 2032-2038 | 7mer-1A | -0.01 | 19 | -0.01 | 0.07  | N/A |
| hsa-miR-885-3p   | 2041-2047 | 7mer-1A | -0.05 | 57 | -0.05 | 0.099 | N/A |
| hsa-miR-6868-5p  | 2042-2049 | 8mer    | -0.1  | 70 | -0.09 | 0     | N/A |
| hsa-miR-4720-5p  | 2043-2049 | 7mer-1A | -0.01 | 30 | -0.01 | 0     | N/A |
| hsa-miR-4799-3p  | 2043-2049 | 7mer-1A | -0.01 | 26 | -0.01 | 0     | N/A |
| hsa-miR-5588-5p  | 2043-2049 | 7mer-1A | -0.01 | 25 | -0.01 | 0     | N/A |
| hsa-miR-3128     | 2043-2049 | 7mer-1A | -0.01 | 19 | -0.01 | 0     | N/A |
| hsa-miR-6744-3p  | 2047-2053 | 7mer-m8 | -0.02 | 50 | -0.02 | 0     | N/A |
| hsa-miR-4757-5p  | 2047-2053 | 7mer-m8 | -0.02 | 34 | -0.02 | 0     | N/A |
| hsa-miR-650      | 2051-2057 | 7mer-1A | -0.08 | 67 | -0.08 | 0.024 | N/A |
| hsa-miR-3612     | 2051-2057 | 7mer-1A | -0.07 | 56 | -0.07 | 0.024 | N/A |
| hsa-miR-4443     | 2051-2057 | 7mer-m8 | -0.03 | 47 | -0.03 | 0     | N/A |
| hsa-miR-7847-3p  | 2052-2058 | 7mer-m8 | -0.03 | 32 | -0.02 | 0     | N/A |
| hsa-miR-4519     | 2056-2063 | 8mer    | -0.03 | 45 | -0.03 | 0     | N/A |
| hsa-miR-4274     | 2057-2063 | 7mer-1A | -0.01 | 41 | -0.01 | 0     | N/A |
| hsa-miR-4524b-5p | 2058-2064 | 7mer-1A | -0.05 | 50 | -0.04 | 0     | N/A |
| hsa-miR-374b-3p  | 2058-2065 | 8mer    | -0.03 | 47 | -0.03 | 0     | N/A |
| hsa-miR-4524a-5p | 2058-2064 | 7mer-1A | -0.02 | 34 | -0.02 | 0     | N/A |

|                 |           |         |       |    |       |       |     |
|-----------------|-----------|---------|-------|----|-------|-------|-----|
| hsa-miR-5009-5p | 2064-2070 | 7mer-m8 | -0.04 | 48 | -0.04 | 0     | N/A |
| hsa-miR-8058    | 2064-2070 | 7mer-m8 | -0.02 | 29 | -0.02 | 0     | N/A |
| hsa-miR-3138    | 2066-2072 | 7mer-1A | -0.12 | 57 | -0.12 | 0     | N/A |
| hsa-miR-4800-5p | 2066-2072 | 7mer-1A | -0.08 | 54 | -0.07 | 0     | N/A |
| hsa-miR-4491    | 2067-2074 | 8mer    | -0.03 | 29 | -0.03 | 0     | N/A |
| hsa-miR-4657    | 2067-2074 | 8mer    | -0.03 | 28 | -0.03 | 0     | N/A |
| hsa-miR-299-3p  | 2068-2074 | 7mer-1A | -0.1  | 73 | -0.09 | 0.067 | N/A |
| hsa-miR-6790-3p | 2080-2086 | 7mer-1A | -0.01 | 23 | -0.01 | 0     | N/A |
| hsa-miR-6821-3p | 2080-2086 | 7mer-1A | -0.01 | 14 | -0.01 | 0     | N/A |
| hsa-miR-6855-3p | 2083-2090 | 8mer    | -0.03 | 46 | -0.03 | 0     | N/A |
| hsa-miR-4513    | 2083-2090 | 8mer    | -0.03 | 46 | -0.03 | 0     | N/A |
| hsa-miR-4439    | 2084-2090 | 7mer-m8 | -0.02 | 34 | -0.02 | 0.024 | N/A |
| hsa-miR-3136-5p | 2084-2090 | 7mer-m8 | -0.02 | 24 | -0.02 | 0.024 | N/A |
| hsa-miR-6857-3p | 2084-2090 | 7mer-1A | -0.01 | 17 | -0.01 | 0     | N/A |
| hsa-miR-134-5p  | 2085-2091 | 7mer-m8 | -0.02 | 30 | -0.02 | 0.069 | N/A |
| hsa-miR-3118    | 2085-2091 | 7mer-m8 | -0.02 | 27 | -0.02 | 0.069 | N/A |
| hsa-miR-2909    | 2091-2097 | 7mer-1A | -0.01 | 34 | -0.01 | 0     | N/A |
| hsa-miR-657     | 2099-2105 | 7mer-m8 | -0.02 | 51 | -0.02 | 0.024 | N/A |
| hsa-miR-6081    | 2102-2108 | 7mer-m8 | -0.04 | 38 | -0.04 | 0     | N/A |
| hsa-miR-6133    | 2105-2111 | 7mer-m8 | -0.19 | 83 | -0.18 | 0.504 | N/A |
| hsa-miR-6130    | 2105-2111 | 7mer-m8 | -0.18 | 82 | -0.17 | 0.504 | N/A |
| hsa-miR-6129    | 2105-2111 | 7mer-m8 | -0.16 | 77 | -0.15 | 0.504 | N/A |
| hsa-miR-4510    | 2105-2111 | 7mer-m8 | -0.16 | 77 | -0.15 | 0.504 | N/A |
| hsa-miR-4419a   | 2105-2111 | 7mer-m8 | -0.14 | 72 | -0.13 | 0.504 | N/A |
| hsa-miR-6127    | 2105-2111 | 7mer-m8 | -0.14 | 71 | -0.13 | 0.504 | N/A |

|                 |           |         |       |    |       |       |     |
|-----------------|-----------|---------|-------|----|-------|-------|-----|
| hsa-miR-6873-5p | 2106-2113 | 8mer    | -0.03 | 33 | -0.03 | 0     | N/A |
| hsa-miR-6866-5p | 2108-2114 | 7mer-1A | -0.01 | 19 | -0.01 | 0     | N/A |
| hsa-miR-877-5p  | 2108-2114 | 7mer-1A | -0.01 | 14 | -0.01 | 0.199 | N/A |
| hsa-miR-331-3p  | 2116-2123 | 8mer    | -0.03 | 54 | -0.03 | 0.154 | N/A |
| hsa-miR-6810-3p | 2117-2123 | 7mer-1A | -0.01 | 29 | -0.01 | 0     | N/A |
| hsa-miR-6801-3p | 2117-2123 | 7mer-1A | -0.01 | 27 | -0.01 | 0     | N/A |
| hsa-miR-6729-3p | 2119-2126 | 8mer    | -0.11 | 74 | -0.1  | 0     | N/A |
| hsa-miR-6870-3p | 2121-2127 | 7mer-m8 | -0.02 | 56 | -0.02 | 0     | N/A |
| hsa-miR-5695    | 2128-2134 | 7mer-m8 | -0.02 | 38 | -0.02 | 0     | N/A |
| hsa-miR-6728-5p | 2135-2141 | 7mer-m8 | -0.02 | 50 | -0.02 | 0     | N/A |
| hsa-miR-5187-5p | 2135-2141 | 7mer-1A | -0.06 | 45 | -0.06 | 0     | N/A |
| hsa-miR-4654    | 2136-2143 | 8mer    | -0.07 | 58 | -0.06 | 0.024 | N/A |
| hsa-miR-4769-5p | 2136-2143 | 8mer    | -0.03 | 48 | -0.03 | 0.024 | N/A |
| hsa-miR-4648    | 2137-2143 | 7mer-1A | -0.01 | 23 | -0.01 | 0     | N/A |
| hsa-miR-1233-5p | 2137-2143 | 7mer-1A | -0.02 | 21 | -0.02 | 0     | N/A |
| hsa-miR-6778-5p | 2137-2143 | 7mer-1A | -0.02 | 20 | -0.02 | 0     | N/A |
| hsa-miR-6796-5p | 2138-2144 | 7mer-1A | -0.07 | 56 | -0.06 | 0     | N/A |
| hsa-miR-4265    | 2138-2144 | 7mer-1A | -0.02 | 46 | -0.02 | 0     | N/A |
| hsa-miR-4296    | 2138-2144 | 7mer-1A | -0.03 | 44 | -0.03 | 0     | N/A |
| hsa-miR-4322    | 2138-2144 | 7mer-1A | -0.01 | 35 | -0.01 | 0     | N/A |
| hsa-miR-6759-5p | 2138-2144 | 7mer-1A | -0.01 | 19 | -0.01 | 0     | N/A |
| hsa-miR-8059    | 2144-2150 | 7mer-m8 | -0.07 | 68 | -0.06 | 0     | N/A |
| hsa-miR-4471    | 2144-2150 | 7mer-m8 | -0.1  | 67 | -0.09 | 0     | N/A |
| hsa-miR-6822-5p | 2145-2152 | 8mer    | -0.1  | 85 | -0.09 | 0     | N/A |
| hsa-miR-6750-5p | 2145-2152 | 8mer    | -0.09 | 84 | -0.08 | 0     | N/A |

|                 |           |         |       |    |       |       |     |
|-----------------|-----------|---------|-------|----|-------|-------|-----|
| hsa-miR-5584-5p | 2146-2152 | 7mer-1A | -0.04 | 54 | -0.03 | 0     | N/A |
| hsa-miR-9500    | 2146-2152 | 7mer-1A | -0.01 | 32 | -0.01 | 0     | N/A |
| hsa-miR-3162-5p | 2147-2153 | 7mer-1A | -0.08 | 51 | -0.07 | 0     | N/A |
| hsa-miR-2909    | 2148-2154 | 7mer-1A | -0.01 | 34 | -0.01 | 0     | N/A |
| hsa-miR-891b    | 2154-2161 | 8mer    | -0.03 | 36 | -0.03 | 0.099 | N/A |
| hsa-miR-4772-3p | 2156-2162 | 7mer-m8 | -0.02 | 54 | -0.02 | 0     | N/A |
| hsa-miR-6829-5p | 2159-2165 | 7mer-m8 | -0.17 | 86 | -0.16 | 0     | N/A |
| hsa-miR-185-3p  | 2160-2166 | 7mer-m8 | -0.11 | 49 | -0.1  | 0     | N/A |
| hsa-miR-6846-5p | 2161-2168 | 8mer    | -0.12 | 56 | -0.12 | 0     | N/A |
| hsa-miR-6848-5p | 2161-2168 | 8mer    | -0.12 | 55 | -0.12 | 0     | N/A |
| hsa-miR-4697-5p | 2162-2168 | 7mer-1A | -0.16 | 66 | -0.15 | 0     | N/A |
| hsa-miR-1237-5p | 2162-2168 | 7mer-1A | -0.12 | 60 | -0.11 | 0     | N/A |
| hsa-miR-4488    | 2162-2168 | 7mer-1A | -0.11 | 57 | -0.1  | 0     | N/A |
| hsa-miR-637     | 2163-2169 | 7mer-m8 | -0.02 | 34 | -0.02 | 0.024 | N/A |
| hsa-miR-6852-5p | 2164-2170 | 7mer-m8 | -0.02 | 44 | -0.02 | 0     | N/A |
| hsa-miR-4292    | 2165-2171 | 7mer-m8 | -0.02 | 30 | -0.02 | 0     | N/A |
| hsa-miR-6791-5p | 2165-2171 | 7mer-m8 | -0.02 | 29 | -0.02 | 0     | N/A |
| hsa-miR-331-3p  | 2166-2172 | 7mer-m8 | -0.02 | 40 | -0.02 | 0.058 | N/A |
| hsa-miR-605-5p  | 2171-2177 | 7mer-m8 | -0.02 | 58 | -0.02 | 0.099 | N/A |
| hsa-miR-4668-3p | 2172-2178 | 7mer-m8 | -0.02 | 74 | -0.02 | 0     | N/A |
| hsa-miR-8063    | 2173-2180 | 8mer    | -0.03 | 86 | -0.03 | 0     | N/A |
| hsa-miR-4698    | 2174-2180 | 7mer-1A | -0.01 | 42 | -0.01 | 0     | N/A |
| hsa-miR-373-5p  | 2175-2181 | 7mer-m8 | -0.02 | 39 | -0.02 | 0.024 | N/A |
| hsa-miR-371b-5p | 2175-2181 | 7mer-m8 | -0.02 | 38 | -0.02 | 0.024 | N/A |
| hsa-miR-616-5p  | 2175-2181 | 7mer-m8 | -0.02 | 34 | -0.02 | 0.024 | N/A |

|                       |           |         |       |    |       |       |          |
|-----------------------|-----------|---------|-------|----|-------|-------|----------|
| hsa-miR-6854-5p       | 2178-2184 | 7mer-1A | -0.01 | 32 | -0.01 | 0     | N/A      |
| hsa-miR-7705          | 2179-2185 | 7mer-m8 | -0.06 | 67 | -0.06 | 0     | N/A      |
| hsa-miR-3682-3p       | 2183-2189 | 7mer-m8 | -0.02 | 17 | -0.02 | 0     | N/A      |
| hsa-miR-6088          | 2185-2191 | 7mer-m8 | -0.02 | 31 | -0.02 | 0.245 | <<br>0.1 |
| hsa-miR-4770          | 2185-2191 | 7mer-m8 | -0.02 | 29 | -0.02 | 0.245 | <<br>0.1 |
| hsa-miR-143-3p        | 2185-2191 | 7mer-m8 | -0.02 | 27 | -0.02 | 0.245 | <<br>0.1 |
| hsa-miR-4756-3p       | 2187-2193 | 7mer-m8 | -0.02 | 52 | -0.02 | 0     | N/A      |
| hsa-miR-3678-3p       | 2189-2195 | 7mer-m8 | -0.05 | 61 | -0.04 | 0     | N/A      |
| hsa-miR-2467-3p       | 2189-2195 | 7mer-1A | -0.06 | 59 | -0.06 | 0     | N/A      |
| hsa-miR-3944-5p       | 2191-2197 | 7mer-1A | -0.05 | 67 | -0.05 | 0     | N/A      |
| hsa-miR-143-5p        | 2191-2197 | 7mer-1A | -0.02 | 42 | -0.02 | 0     | N/A      |
| hsa-miR-1304-3p       | 2203-2209 | 7mer-1A | -0.01 | 26 | -0.01 | 0.437 | N/A      |
| hsa-miR-1229-3p       | 2204-2210 | 7mer-1A | -0.02 | 44 | -0.01 | 0     | N/A      |
| hsa-miR-942-5p        | 2206-2212 | 7mer-1A | -0.01 | 26 | -0.01 | 0.024 | N/A      |
| hsa-miR-6740-3p       | 2207-2213 | 7mer-m8 | -0.03 | 39 | -0.03 | 0     | N/A      |
| hsa-miR-409-3p        | 2218-2224 | 7mer-m8 | -0.02 | 71 | -0.02 | 1.639 | N/A      |
| hsa-miR-203a-3p.<br>1 | 2220-2226 | 7mer-m8 | -0.02 | 50 | -0.02 | 1.905 | 0.2<br>3 |
| hsa-miR-5680          | 2221-2228 | 8mer    | -0.03 | 87 | -0.03 | 0     | N/A      |
| hsa-miR-10b-3p        | 2230-2237 | 8mer    | -0.06 | 76 | -0.06 | 0     | N/A      |
| hsa-miR-4330          | 2232-2239 | 8mer    | -0.07 | 81 | -0.07 | 0     | N/A      |
| hsa-miR-216a-5p       | 2235-2241 | 7mer-m8 | -0.02 | 27 | -0.02 | 0.88  | <        |

|                 |           |         |       |    |       |       |          |
|-----------------|-----------|---------|-------|----|-------|-------|----------|
|                 |           |         |       |    |       |       | 0.1      |
| hsa-miR-4668-3p | 2238-2244 | 7mer-1A | -0.01 | 56 | -0.01 | 0     | N/A      |
| hsa-miR-3163    | 2239-2246 | 8mer    | -0.03 | 86 | -0.03 | 0     | N/A      |
| hsa-miR-338-5p  | 2244-2250 | 7mer-m8 | -0.02 | 51 | -0.02 | 0     | N/A      |
| hsa-miR-888-3p  | 2248-2254 | 7mer-m8 | -0.02 | 29 | -0.02 | 0     | N/A      |
| hsa-miR-140-5p  | 2256-2262 | 7mer-m8 | -0.13 | 80 | -0.13 | 1.813 | 0.2<br>7 |
| hsa-miR-4796-3p | 2258-2264 | 7mer-m8 | -0.03 | 74 | -0.03 | 0     | N/A      |
| hsa-miR-1257    | 2272-2278 | 7mer-m8 | -0.04 | 43 | -0.04 | 0     | N/A      |
| hsa-miR-7854-3p | 2275-2282 | 8mer    | -0.14 | 80 | -0.13 | 0     | N/A      |
| hsa-miR-6134    | 2276-2282 | 7mer-1A | -0.08 | 57 | -0.08 | 0.024 | N/A      |
| hsa-miR-7162-3p | 2277-2283 | 7mer-m8 | -0.02 | 63 | -0.02 | 0     | N/A      |
| hsa-miR-544b    | 2278-2285 | 8mer    | -0.12 | 80 | -0.12 | 0     | N/A      |
| hsa-miR-4324    | 2279-2285 | 7mer-1A | -0.05 | 63 | -0.05 | 0     | N/A      |
| hsa-miR-1200    | 2279-2285 | 7mer-m8 | -0.04 | 60 | -0.04 | 0     | N/A      |
| hsa-miR-4666b   | 2285-2291 | 7mer-m8 | -0.02 | 36 | -0.02 | 0     | N/A      |
| hsa-miR-20a-3p  | 2287-2293 | 7mer-1A | -0.09 | 73 | -0.08 | 0     | N/A      |
| hsa-miR-544a    | 2288-2295 | 8mer    | -0.03 | 37 | -0.03 | 0.024 | N/A      |
| hsa-miR-6738-3p | 2289-2295 | 7mer-1A | -0.01 | 32 | -0.01 | 0     | N/A      |
| hsa-miR-4513    | 2300-2306 | 7mer-1A | -0.05 | 60 | -0.05 | 0     | N/A      |
| hsa-miR-6855-3p | 2300-2306 | 7mer-1A | -0.04 | 53 | -0.04 | 0     | N/A      |
| hsa-miR-6857-3p | 2300-2306 | 7mer-1A | -0.03 | 39 | -0.03 | 0     | N/A      |
| hsa-miR-4439    | 2300-2306 | 7mer-m8 | -0.02 | 34 | -0.02 | 0.024 | N/A      |
| hsa-miR-3136-5p | 2300-2306 | 7mer-m8 | -0.02 | 24 | -0.02 | 0.024 | N/A      |
| hsa-miR-345-5p  | 2302-2308 | 7mer-1A | -0.01 | 44 | -0.01 | 0.099 | N/A      |

|                       |           |         |       |    |       |       |     |
|-----------------------|-----------|---------|-------|----|-------|-------|-----|
| hsa-miR-4256          | 2303-2309 | 7mer-1A | -0.13 | 78 | -0.12 | 0     | N/A |
| hsa-miR-6874-3p       | 2305-2311 | 7mer-m8 | -0.02 | 45 | -0.02 | 0     | N/A |
| hsa-miR-148b-5p       | 2305-2311 | 7mer-m8 | -0.02 | 42 | -0.02 | 0     | N/A |
| hsa-miR-4277          | 2306-2312 | 7mer-m8 | -0.02 | 45 | -0.02 | 0     | N/A |
| hsa-miR-7977          | 2310-2316 | 7mer-1A | -0.01 | 33 | -0.01 | 0     | N/A |
| hsa-miR-4652-3p       | 2316-2322 | 7mer-m8 | -0.02 | 58 | -0.02 | 0     | N/A |
| hsa-miR-3182          | 2317-2323 | 7mer-m8 | -0.02 | 59 | -0.02 | 0.312 | N/A |
| hsa-miR-1237-3p       | 2318-2325 | 8mer    | -0.11 | 82 | -0.1  | 0.024 | N/A |
| hsa-miR-6868-3p       | 2319-2325 | 7mer-m8 | -0.02 | 38 | -0.02 | 0     | N/A |
| hsa-miR-1248          | 2319-2325 | 7mer-1A | -0.02 | 37 | -0.02 | 0.024 | N/A |
| hsa-miR-922           | 2333-2339 | 7mer-m8 | -0.02 | 52 | -0.02 | 0.099 | N/A |
| hsa-miR-2277-3p       | 2336-2342 | 7mer-1A | -0.02 | 33 | -0.02 | 0     | N/A |
| hsa-miR-542-3p        | 2337-2343 | 7mer-m8 | -0.02 | 30 | -0.02 | 1.28  | N/A |
| hsa-miR-4789-3p       | 2345-2351 | 7mer-m8 | -0.02 | 40 | -0.02 | 0     | N/A |
| hsa-miR-642b-3p       | 2346-2353 | 8mer    | -0.03 | 47 | -0.03 | 0     | N/A |
| hsa-miR-642a-3p       | 2346-2353 | 8mer    | -0.03 | 46 | -0.03 | 0     | N/A |
| hsa-miR-514a-3p       | 2348-2354 | 7mer-m8 | -0.06 | 70 | -0.05 | 0.099 | N/A |
| hsa-miR-514b-3p       | 2348-2354 | 7mer-m8 | -0.06 | 70 | -0.05 | 0.099 | N/A |
| hsa-miR-526b-5p       | 2351-2357 | 7mer-1A | -0.01 | 34 | -0.01 | 0.099 | N/A |
| hsa-miR-103a-2-5<br>p | 2353-2360 | 8mer    | -0.03 | 45 | -0.03 | 0.085 | N/A |
| hsa-miR-4686          | 2357-2363 | 7mer-m8 | -0.02 | 35 | -0.02 | 0     | N/A |
| hsa-miR-452-3p        | 2359-2365 | 7mer-m8 | -0.02 | 40 | -0.02 | 0     | N/A |
| hsa-miR-6072          | 2368-2374 | 7mer-m8 | -0.03 | 52 | -0.03 | 0     | N/A |
| hsa-miR-6891-3p       | 2368-2374 | 7mer-m8 | -0.02 | 45 | -0.02 | 0     | N/A |

|                  |           |         |       |    |       |       |          |
|------------------|-----------|---------|-------|----|-------|-------|----------|
| hsa-miR-6747-3p  | 2372-2378 | 7mer-m8 | -0.05 | 61 | -0.05 | 0     | N/A      |
| hsa-miR-631      | 2375-2381 | 7mer-1A | -0.04 | 37 | -0.04 | 0.024 | N/A      |
| hsa-miR-3661     | 2375-2381 | 7mer-1A | -0.03 | 33 | -0.03 | 0.024 | N/A      |
| hsa-miR-3680-5p  | 2388-2394 | 7mer-m8 | -0.02 | 35 | -0.02 | 0     | N/A      |
| hsa-miR-134-5p   | 2392-2398 | 7mer-1A | -0.1  | 67 | -0.1  | 0.206 | N/A      |
| hsa-miR-3118     | 2392-2398 | 7mer-1A | -0.1  | 67 | -0.1  | 0.206 | N/A      |
| hsa-miR-6820-3p  | 2392-2398 | 7mer-1A | -0.02 | 28 | -0.02 | 0     | N/A      |
| hsa-miR-3164     | 2392-2398 | 7mer-1A | -0.01 | 18 | -0.01 | 0     | N/A      |
| hsa-miR-4501     | 2393-2399 | 7mer-m8 | -0.09 | 82 | -0.08 | 0     | N/A      |
| hsa-miR-8066     | 2394-2400 | 7mer-m8 | -0.02 | 34 | -0.02 | 0     | N/A      |
| hsa-miR-187-5p   | 2399-2406 | 8mer    | -0.04 | 52 | -0.04 | 0.085 | N/A      |
| hsa-miR-222-3p   | 2400-2406 | 7mer-1A | -0.11 | 70 | -0.1  | 2.697 | 0.2      |
| hsa-miR-221-3p   | 2400-2406 | 7mer-1A | -0.1  | 67 | -0.09 | 2.697 | 0.2      |
| hsa-miR-548v     | 2400-2406 | 7mer-1A | -0.09 | 58 | -0.08 | 0     | N/A      |
| hsa-miR-155-5p   | 2403-2410 | 8mer    | -0.14 | 80 | -0.14 | 0.154 | <<br>0.1 |
| hsa-miR-28-3p    | 2413-2419 | 7mer-1A | -0.11 | 81 | -0.11 | 0.492 | N/A      |
| hsa-miR-8084     | 2415-2421 | 7mer-m8 | -0.02 | 56 | -0.02 | 0     | N/A      |
| hsa-miR-1283     | 2422-2428 | 7mer-m8 | -0.07 | 66 | -0.07 | 0.024 | N/A      |
| hsa-miR-6715b-3p | 2428-2434 | 7mer-1A | -0.01 | 45 | -0.01 | 0     | N/A      |
| hsa-miR-607      | 2429-2435 | 7mer-1A | -0.01 | 40 | -0.01 | 0     | N/A      |
| hsa-miR-4676-3p  | 2433-2440 | 8mer    | -0.04 | 62 | -0.04 | 0.069 | N/A      |
| hsa-miR-892c-3p  | 2433-2440 | 8mer    | -0.03 | 54 | -0.03 | 0.069 | N/A      |
| hsa-miR-452-5p   | 2433-2440 | 8mer    | -0.03 | 52 | -0.03 | 0.069 | N/A      |
| hsa-miR-4693-5p  | 2435-2441 | 7mer-1A | -0.1  | 70 | -0.09 | 0     | N/A      |

|                 |           |               |       |     |       |       |     |
|-----------------|-----------|---------------|-------|-----|-------|-------|-----|
| hsa-miR-4477a   | 2442-2449 | 8mer          | -0.03 | 75  | -0.03 | 0     | N/A |
| hsa-miR-5691    | 2451-2457 | 7mer-1A       | -0.05 | 60  | -0.05 | 0     | N/A |
| hsa-miR-6805-3p | 2451-2457 | 7mer-1A       | -0.01 | 34  | -0.01 | 0     | N/A |
| hsa-miR-6885-3p | 2453-2459 | 7mer-1A       | -0.01 | 32  | -0.01 | 0     | N/A |
| hsa-miR-3140-3p | 2455-2461 | 7mer-m8       | -0.02 | 42  | -0.02 | 0     | N/A |
| hsa-miR-208a-5p | 2456-2463 | 8mer          | -0.03 | 78  | -0.03 | 0     | N/A |
| hsa-miR-208b-5p | 2456-2463 | 8mer          | -0.03 | 59  | -0.03 | 0     | N/A |
| hsa-miR-6878-5p | 2465-2476 | non-canonical | N/A   | N/A | N/A   | 0     | N/A |
| hsa-miR-6878-5p | 2465-2476 | non-canonical | N/A   | N/A | N/A   | 0     | N/A |
| hsa-miR-3185    | 2474-2481 | 8mer          | -0.11 | 86  | -0.09 | 0     | N/A |
| hsa-miR-4517    | 2479-2485 | 7mer-m8       | -0.02 | 39  | -0.02 | 0     | N/A |
| hsa-miR-6124    | 2490-2496 | 7mer-1A       | -0.01 | 49  | -0.01 | 0     | N/A |
| hsa-miR-3148    | 2490-2496 | 7mer-1A       | -0.01 | 25  | -0.01 | 0     | N/A |
| hsa-miR-3165    | 2493-2499 | 7mer-1A       | -0.13 | 80  | -0.11 | 0.024 | N/A |
| hsa-miR-8071    | 2493-2499 | 7mer-1A       | -0.1  | 77  | -0.08 | 0     | N/A |
| hsa-miR-6880-5p | 2493-2499 | 7mer-1A       | -0.11 | 63  | -0.1  | 0     | N/A |
| hsa-miR-584-5p  | 2496-2502 | 7mer-1A       | -0.01 | 16  | -0.01 | 0.099 | N/A |
| hsa-miR-4766-3p | 2510-2516 | 7mer-1A       | -0.05 | 59  | -0.04 | 0     | N/A |
| hsa-miR-374b-3p | 2511-2517 | 7mer-1A       | -0.06 | 59  | -0.05 | 0     | N/A |
| hsa-miR-32-3p   | 2513-2519 | 7mer-m8       | -0.02 | 73  | -0.02 | 0     | N/A |
| hsa-miR-633     | 2520-2526 | 7mer-1A       | -0.01 | 28  | -0.01 | 0     | N/A |
| hsa-miR-4282    | 2525-2531 | 7mer-1A       | -0.01 | 49  | -0.01 | 0     | N/A |
| hsa-miR-302a-5p | 2528-2534 | 7mer-1A       | -0.01 | 50  | -0.01 | 0     | N/A |

|                       |           |         |       |    |       |       |          |
|-----------------------|-----------|---------|-------|----|-------|-------|----------|
| hsa-miR-6828-5p       | 2538-2544 | 7mer-m8 | -0.02 | 19 | -0.02 | 0     | N/A      |
| hsa-miR-4747-5p       | 2540-2546 | 7mer-1A | -0.06 | 53 | -0.05 | 0     | N/A      |
| hsa-miR-5196-5p       | 2540-2546 | 7mer-1A | -0.02 | 31 | -0.02 | 0     | N/A      |
| hsa-miR-450a-1-3<br>p | 2541-2548 | 8mer    | -0.03 | 41 | -0.03 | 0.085 | N/A      |
| hsa-miR-3122          | 2542-2548 | 7mer-1A | -0.01 | 41 | -0.01 | 0.085 | N/A      |
| hsa-miR-887-5p        | 2542-2548 | 7mer-1A | -0.02 | 35 | -0.02 | 0     | N/A      |
| hsa-miR-3913-5p       | 2542-2548 | 7mer-1A | -0.01 | 35 | -0.01 | 0.085 | N/A      |
| hsa-miR-6513-5p       | 2542-2548 | 7mer-1A | -0.01 | 25 | -0.01 | 0     | N/A      |
| hsa-miR-146b-5p       | 2551-2558 | 8mer    | -0.05 | 54 | -0.04 | 0.221 | <<br>0.1 |
| hsa-miR-146a-5p       | 2551-2558 | 8mer    | -0.05 | 54 | -0.04 | 0.221 | <<br>0.1 |
| hsa-miR-7153-5p       | 2551-2558 | 8mer    | -0.05 | 54 | -0.04 | 0.221 | <<br>0.1 |
| hsa-miR-589-5p        | 2552-2558 | 7mer-1A | -0.01 | 30 | -0.01 | 0.099 | N/A      |
| hsa-miR-573           | 2557-2563 | 7mer-m8 | -0.04 | 60 | -0.03 | 0.085 | N/A      |
| hsa-miR-3616-5p       | 2557-2563 | 7mer-m8 | -0.04 | 59 | -0.04 | 0.085 | N/A      |
| hsa-miR-4795-5p       | 2557-2563 | 7mer-1A | -0.03 | 47 | -0.03 | 0     | N/A      |
| hsa-miR-1245b-3p      | 2561-2567 | 7mer-m8 | -0.02 | 30 | -0.02 | 0     | N/A      |
| hsa-miR-5683          | 2562-2568 | 7mer-m8 | -0.02 | 42 | -0.02 | 0     | N/A      |
| hsa-miR-4520-3p       | 2565-2571 | 7mer-m8 | -0.04 | 53 | -0.04 | 0     | N/A      |
| hsa-miR-4638-3p       | 2566-2572 | 7mer-m8 | -0.02 | 18 | -0.02 | 0     | N/A      |
| hsa-miR-3690          | 2567-2573 | 7mer-m8 | -0.02 | 52 | -0.02 | 0     | N/A      |
| hsa-miR-4308          | 2568-2575 | 8mer    | -0.03 | 43 | -0.03 | 0     | N/A      |

|                       |           |         |       |    |       |       |          |
|-----------------------|-----------|---------|-------|----|-------|-------|----------|
| hsa-miR-4292          | 2569-2575 | 7mer-1A | -0.01 | 25 | -0.01 | 0     | N/A      |
| hsa-miR-6791-5p       | 2569-2575 | 7mer-1A | -0.01 | 24 | -0.01 | 0     | N/A      |
| hsa-miR-7113-3p       | 2570-2576 | 7mer-m8 | -0.02 | 38 | -0.02 | 0     | N/A      |
| hsa-miR-6778-3p       | 2572-2579 | 8mer    | -0.03 | 43 | -0.03 | 0     | N/A      |
| hsa-miR-6836-3p       | 2573-2579 | 7mer-m8 | -0.02 | 38 | -0.02 | 0     | N/A      |
| hsa-miR-6791-3p       | 2573-2579 | 7mer-1A | -0.01 | 26 | -0.01 | 0     | N/A      |
| hsa-miR-6829-3p       | 2573-2579 | 7mer-1A | -0.01 | 25 | -0.01 | 0     | N/A      |
| hsa-miR-550b-2-5<br>p | 2575-2581 | 7mer-m8 | -0.02 | 29 | -0.02 | 0     | N/A      |
| hsa-miR-550a-3-5<br>p | 2575-2581 | 7mer-1A | -0.01 | 12 | -0.01 | 0.099 | N/A      |
| hsa-miR-550a-5p       | 2575-2581 | 7mer-1A | -0.01 | 12 | -0.01 | 0.099 | N/A      |
| hsa-miR-1271-3p       | 2575-2581 | 7mer-1A | -0.01 | 11 | -0.01 | 0.099 | N/A      |
| hsa-miR-6889-3p       | 2576-2582 | 7mer-m8 | -0.02 | 42 | -0.02 | 0.085 | N/A      |
| hsa-miR-1324          | 2585-2591 | 7mer-m8 | -0.02 | 41 | -0.02 | 0.024 | N/A      |
| hsa-miR-6815-3p       | 2594-2600 | 7mer-m8 | -0.02 | 30 | -0.02 | 0     | N/A      |
| hsa-miR-1251-3p       | 2601-2607 | 7mer-m8 | -0.02 | 51 | -0.02 | 0.489 | N/A      |
| hsa-miR-3158-3p       | 2604-2610 | 7mer-m8 | -0.05 | 57 | -0.05 | 0     | N/A      |
| hsa-miR-3975          | 2611-2617 | 7mer-m8 | -0.06 | 68 | -0.05 | 0     | N/A      |
| hsa-miR-4709-3p       | 2615-2621 | 7mer-m8 | -0.02 | 47 | -0.02 | 0     | N/A      |
| hsa-miR-27a-3p        | 2633-2639 | 7mer-m8 | -0.02 | 47 | -0.02 | 0     | <<br>0.1 |
| hsa-miR-27b-3p        | 2633-2639 | 7mer-m8 | -0.02 | 46 | -0.02 | 0     | <<br>0.1 |
| hsa-miR-128-3p        | 2633-2639 | 7mer-1A | -0.01 | 31 | -0.01 | 0     | <        |

|                  |           |         |       |    |       |       |          |
|------------------|-----------|---------|-------|----|-------|-------|----------|
|                  |           |         |       |    |       |       | 0.1      |
| hsa-miR-216a-3p  | 2633-2639 | 7mer-1A | -0.01 | 30 | -0.01 | 0     | <<br>0.1 |
| hsa-miR-3681-3p  | 2633-2639 | 7mer-1A | -0.01 | 28 | -0.01 | 0     | <<br>0.1 |
| hsa-miR-6884-3p  | 2636-2642 | 7mer-m8 | -0.02 | 50 | -0.02 | 0     | N/A      |
| hsa-miR-4641     | 2639-2645 | 7mer-1A | -0.01 | 12 | -0.01 | 0     | N/A      |
| hsa-miR-3661     | 2644-2650 | 7mer-1A | -0.01 | 15 | -0.01 | 0.024 | N/A      |
| hsa-miR-631      | 2644-2650 | 7mer-1A | -0.01 | 13 | -0.01 | 0.024 | N/A      |
| hsa-miR-378a-5p  | 2647-2653 | 7mer-m8 | -0.02 | 54 | -0.02 | 0     | N/A      |
| hsa-miR-3653-5p  | 2648-2655 | 8mer    | -0.03 | 61 | -0.03 | 0     | N/A      |
| hsa-miR-1976     | 2649-2655 | 7mer-1A | -0.01 | 47 | -0.01 | 0     | N/A      |
| hsa-miR-6845-3p  | 2650-2656 | 7mer-m8 | -0.02 | 36 | -0.02 | 0     | N/A      |
| hsa-miR-7111-3p  | 2652-2658 | 7mer-m8 | -0.02 | 48 | -0.02 | 0     | N/A      |
| hsa-miR-3183     | 2652-2658 | 7mer-1A | -0.01 | 36 | -0.01 | 0     | N/A      |
| hsa-miR-4723-3p  | 2652-2658 | 7mer-1A | -0.01 | 28 | -0.01 | 0     | N/A      |
| hsa-miR-6769b-3p | 2652-2658 | 7mer-1A | -0.01 | 28 | -0.01 | 0     | N/A      |
| hsa-miR-4268     | 2654-2660 | 7mer-m8 | -0.02 | 49 | -0.02 | 0     | N/A      |
| hsa-miR-6736-3p  | 2656-2662 | 7mer-m8 | -0.04 | 61 | -0.03 | 0     | N/A      |
| hsa-miR-4660     | 2657-2663 | 7mer-m8 | -0.02 | 39 | -0.02 | 0.024 | N/A      |
| hsa-miR-6721-5p  | 2660-2666 | 7mer-1A | -0.01 | 21 | -0.01 | 0     | N/A      |
| hsa-miR-365b-5p  | 2667-2674 | 8mer    | -0.05 | 50 | -0.05 | 0     | N/A      |
| hsa-miR-365a-5p  | 2667-2674 | 8mer    | -0.04 | 40 | -0.03 | 0     | N/A      |
| hsa-miR-8052     | 2668-2674 | 7mer-1A | -0.09 | 58 | -0.08 | 0     | N/A      |
| hsa-miR-3199     | 2668-2674 | 7mer-1A | -0.05 | 38 | -0.04 | 0     | N/A      |

|                  |           |               |       |     |       |       |       |
|------------------|-----------|---------------|-------|-----|-------|-------|-------|
| hsa-miR-5694     | 2668-2679 | non-canonical | N/A   | N/A | N/A   | 0     | N/A   |
| hsa-miR-5694     | 2668-2679 | non-canonical | N/A   | N/A | N/A   | 0     | N/A   |
| hsa-miR-2681-3p  | 2672-2678 | 7mer-m8       | -0.05 | 65  | -0.04 | 0     | N/A   |
| hsa-miR-6800-5p  | 2681-2688 | 8mer          | -0.03 | 27  | -0.03 | 0     | N/A   |
| hsa-miR-6802-5p  | 2682-2688 | 7mer-1A       | -0.12 | 63  | -0.1  | 0     | N/A   |
| hsa-miR-1258     | 2684-2690 | 7mer-1A       | -0.16 | 68  | -0.13 | 0.099 | N/A   |
| hsa-miR-4687-3p  | 2687-2693 | 7mer-m8       | -0.04 | 53  | -0.04 | 0     | N/A   |
| hsa-miR-4741     | 2688-2694 | 7mer-m8       | -0.11 | 79  | -0.09 | 0     | N/A   |
| hsa-miR-4675     | 2688-2694 | 7mer-m8       | -0.06 | 77  | -0.05 | 0     | N/A   |
| hsa-miR-4446-3p  | 2689-2695 | 7mer-m8       | -0.13 | 76  | -0.11 | 0.099 | N/A   |
| hsa-miR-3127-5p  | 2691-2697 | 7mer-m8       | -0.16 | 81  | -0.14 | 0.024 | N/A   |
| hsa-miR-3918     | 2691-2697 | 7mer-1A       | -0.01 | 34  | -0.01 | 0     | N/A   |
| hsa-miR-4772-5p  | 2693-2700 | 8mer          | -0.03 | 32  | -0.03 | 0     | N/A   |
| hsa-miR-383-5p.1 | 2694-2700 | 7mer-1A       | -0.02 | 15  | -0.02 | 0.032 | < 0.1 |
| hsa-miR-4513     | 2698-2704 | 7mer-1A       | -0.06 | 62  | -0.05 | 0     | N/A   |
| hsa-miR-6855-3p  | 2698-2704 | 7mer-1A       | -0.03 | 48  | -0.03 | 0     | N/A   |
| hsa-miR-4439     | 2698-2704 | 7mer-m8       | -0.02 | 34  | -0.02 | 0     | N/A   |
| hsa-miR-3136-5p  | 2698-2704 | 7mer-m8       | -0.02 | 24  | -0.02 | 0     | N/A   |
| hsa-miR-6857-3p  | 2698-2704 | 7mer-1A       | -0.01 | 17  | -0.01 | 0     | N/A   |
| hsa-miR-888-3p   | 2701-2707 | 7mer-1A       | -0.01 | 21  | -0.01 | 0     | N/A   |
| hsa-miR-1278     | 2703-2709 | 7mer-m8       | -0.03 | 41  | -0.03 | 0.024 | N/A   |
| hsa-miR-1911-5p  | 2705-2711 | 7mer-1A       | -0.04 | 34  | -0.03 | 0     | N/A   |

|                  |           |         |       |    |       |       |          |
|------------------|-----------|---------|-------|----|-------|-------|----------|
| hsa-miR-6869-5p  | 2706-2712 | 7mer-1A | -0.01 | 38 | -0.01 | 0     | N/A      |
| hsa-miR-8081     | 2707-2713 | 7mer-1A | -0.01 | 32 | -0.01 | 0     | N/A      |
| hsa-miR-1289     | 2718-2725 | 8mer    | -0.11 | 69 | -0.09 | 0.024 | N/A      |
| hsa-miR-4309     | 2719-2725 | 7mer-m8 | -0.08 | 75 | -0.07 | 0     | N/A      |
| hsa-miR-3198     | 2719-2725 | 7mer-m8 | -0.02 | 66 | -0.02 | 0     | N/A      |
| hsa-miR-4294     | 2719-2725 | 7mer-1A | -0.03 | 46 | -0.03 | 0     | N/A      |
| hsa-miR-6514-5p  | 2720-2726 | 7mer-m8 | -0.02 | 34 | -0.02 | 0     | N/A      |
| hsa-miR-4534     | 2721-2727 | 7mer-m8 | -0.02 | 38 | -0.02 | 0     | N/A      |
| hsa-miR-8082     | 2721-2727 | 7mer-m8 | -0.02 | 26 | -0.02 | 0     | N/A      |
| hsa-miR-6757-5p  | 2724-2730 | 7mer-m8 | -0.04 | 42 | -0.03 | 0     | N/A      |
| hsa-miR-6754-5p  | 2726-2732 | 7mer-1A | -0.03 | 53 | -0.03 | 0     | N/A      |
| hsa-miR-4441     | 2726-2732 | 7mer-1A | -0.04 | 53 | -0.03 | 0     | N/A      |
| hsa-miR-211-3p   | 2726-2732 | 7mer-1A | -0.01 | 49 | -0.01 | 0     | N/A      |
| hsa-miR-4270     | 2726-2732 | 7mer-1A | -0.01 | 31 | -0.01 | 0     | N/A      |
| hsa-miR-3127-5p  | 2727-2733 | 7mer-1A | -0.05 | 52 | -0.04 | 0.024 | N/A      |
| hsa-miR-7-5p     | 2735-2741 | 7mer-m8 | -0.02 | 56 | -0.02 | 0.245 | <<br>0.1 |
| hsa-miR-873-5p.1 | 2738-2744 | 7mer-1A | -0.01 | 56 | -0.01 | 0.556 | N/A      |
| hsa-miR-4705     | 2742-2748 | 7mer-1A | -0.01 | 33 | -0.01 | 0     | N/A      |
| hsa-miR-4755-3p  | 2751-2757 | 7mer-m8 | -0.16 | 79 | -0.14 | 0     | N/A      |
| hsa-miR-4753-5p  | 2754-2761 | 8mer    | -0.03 | 34 | -0.03 | 0     | N/A      |
| hsa-miR-506-3p   | 2756-2762 | 7mer-1A | -0.01 | 13 | -0.01 | 0.221 | <<br>0.1 |
| hsa-miR-124-3p.2 | 2756-2762 | 7mer-1A | -0.01 | 8  | -0.01 | 0.221 | <<br>0.1 |

|                  |           |         |       |    |       |       |     |
|------------------|-----------|---------|-------|----|-------|-------|-----|
| hsa-miR-4477a    | 2758-2764 | 7mer-m8 | -0.02 | 64 | -0.02 | 0     | N/A |
| hsa-miR-503-3p   | 2761-2767 | 7mer-m8 | -0.02 | 26 | -0.02 | 0     | N/A |
| hsa-miR-6755-5p  | 2763-2769 | 7mer-1A | -0.04 | 36 | -0.04 | 0     | N/A |
| hsa-miR-6841-5p  | 2763-2769 | 7mer-1A | -0.03 | 26 | -0.02 | 0     | N/A |
| hsa-miR-135b-3p  | 2765-2771 | 7mer-m8 | -0.12 | 65 | -0.1  | 0     | N/A |
| hsa-miR-3137     | 2767-2773 | 7mer-1A | -0.01 | 39 | -0.01 | 0     | N/A |
| hsa-miR-20b-3p   | 2767-2773 | 7mer-1A | -0.01 | 20 | -0.01 | 0     | N/A |
| hsa-miR-3686     | 2768-2774 | 7mer-1A | -0.03 | 35 | -0.02 | 0     | N/A |
| hsa-miR-4743-3p  | 2769-2775 | 7mer-1A | -0.01 | 39 | -0.01 | 0     | N/A |
| hsa-miR-4652-3p  | 2769-2775 | 7mer-1A | -0.01 | 36 | -0.01 | 0     | N/A |
| hsa-miR-3160-5p  | 2771-2777 | 7mer-m8 | -0.02 | 41 | -0.02 | 0     | N/A |
| hsa-miR-4438     | 2775-2781 | 7mer-m8 | -0.02 | 37 | -0.02 | 0.312 | N/A |
| hsa-miR-4520-3p  | 2778-2784 | 7mer-m8 | -0.04 | 50 | -0.03 | 0     | N/A |
| hsa-miR-3928-3p  | 2796-2802 | 7mer-1A | -0.01 | 50 | -0.01 | 0     | N/A |
| hsa-miR-3915     | 2796-2802 | 7mer-m8 | -0.02 | 20 | -0.02 | 0     | N/A |
| hsa-miR-6857-3p  | 2799-2806 | 8mer    | -0.03 | 36 | -0.03 | 0     | N/A |
| hsa-miR-4439     | 2800-2806 | 7mer-m8 | -0.02 | 34 | -0.02 | 0.024 | N/A |
| hsa-miR-6855-3p  | 2800-2806 | 7mer-1A | -0.01 | 26 | -0.01 | 0     | N/A |
| hsa-miR-4513     | 2800-2806 | 7mer-1A | -0.01 | 25 | -0.01 | 0     | N/A |
| hsa-miR-3136-5p  | 2800-2806 | 7mer-m8 | -0.02 | 24 | -0.02 | 0.024 | N/A |
| hsa-miR-873-5p.1 | 2807-2813 | 7mer-m8 | -0.02 | 74 | -0.02 | 1.017 | N/A |
| hsa-miR-665      | 2809-2815 | 7mer-1A | -0.09 | 71 | -0.08 | 0.899 | N/A |
| hsa-miR-3974     | 2817-2823 | 7mer-1A | -0.08 | 60 | -0.07 | 0.085 | N/A |
| hsa-miR-555      | 2820-2826 | 7mer-m8 | -0.02 | 15 | -0.02 | 0.024 | N/A |
| hsa-miR-6881-5p  | 2821-2828 | 8mer    | -0.03 | 6  | -0.03 | 0     | N/A |

|                 |           |         |       |    |       |       |          |
|-----------------|-----------|---------|-------|----|-------|-------|----------|
| hsa-miR-6890-5p | 2823-2829 | 7mer-m8 | -0.03 | 32 | -0.03 | 0     | N/A      |
| hsa-miR-7704    | 2830-2836 | 7mer-1A | -0.08 | 56 | -0.07 | 0     | N/A      |
| hsa-miR-615-5p  | 2830-2836 | 7mer-1A | -0.02 | 34 | -0.02 | 0.085 | N/A      |
| hsa-miR-7155-5p | 2831-2837 | 7mer-m8 | -0.07 | 71 | -0.06 | 0     | N/A      |
| hsa-miR-4731-5p | 2832-2838 | 7mer-m8 | -0.14 | 81 | -0.12 | 0     | N/A      |
| hsa-miR-320e    | 2834-2840 | 7mer-m8 | -0.02 | 37 | -0.02 | 0     | N/A      |
| hsa-miR-127-5p  | 2836-2842 | 7mer-m8 | -0.02 | 35 | -0.02 | 0     | N/A      |
| hsa-miR-3928-5p | 2836-2842 | 7mer-1A | -0.01 | 34 | -0.01 | 0.085 | N/A      |
| hsa-miR-6806-3p | 2836-2842 | 7mer-1A | -0.01 | 33 | -0.01 | 0.085 | N/A      |
| hsa-miR-6821-3p | 2861-2867 | 7mer-m8 | -0.03 | 40 | -0.03 | 0     | N/A      |
| hsa-miR-6868-3p | 2868-2874 | 7mer-1A | -0.04 | 58 | -0.03 | 0     | N/A      |
| hsa-miR-3124-3p | 2870-2876 | 7mer-m8 | -0.02 | 37 | -0.02 | 0     | N/A      |
| hsa-miR-4448    | 2878-2884 | 7mer-m8 | -0.02 | 45 | -0.02 | 0     | N/A      |
| hsa-miR-6736-3p | 2880-2887 | 8mer    | -0.09 | 77 | -0.08 | 0     | N/A      |
| hsa-miR-6787-3p | 2882-2889 | 8mer    | -0.03 | 64 | -0.03 | 0     | N/A      |
| hsa-miR-3670    | 2888-2894 | 7mer-1A | -0.12 | 66 | -0.1  | 0.085 | N/A      |
| hsa-miR-8066    | 2892-2898 | 7mer-m8 | -0.02 | 34 | -0.02 | 0     | N/A      |
| hsa-miR-6770-3p | 2906-2912 | 7mer-m8 | -0.17 | 72 | -0.14 | 0     | N/A      |
| hsa-miR-4467    | 2906-2912 | 7mer-1A | -0.17 | 68 | -0.14 | 0     | N/A      |
| hsa-miR-4696    | 2927-2933 | 7mer-1A | -0.01 | 30 | -0.01 | 0     | N/A      |
| hsa-miR-1322    | 2931-2937 | 7mer-m8 | -0.03 | 70 | -0.02 | 0.024 | N/A      |
| hsa-miR-4770    | 2934-2940 | 7mer-m8 | -0.03 | 38 | -0.02 | 0.229 | <<br>0.1 |
| hsa-miR-6088    | 2934-2940 | 7mer-m8 | -0.02 | 31 | -0.02 | 0.229 | <<br>0.1 |

|                  |           |         |       |    |       |       |       |
|------------------|-----------|---------|-------|----|-------|-------|-------|
| hsa-miR-143-3p   | 2934-2940 | 7mer-m8 | -0.02 | 27 | -0.02 | 0.229 | < 0.1 |
| hsa-miR-1303     | 2937-2943 | 7mer-m8 | -0.02 | 23 | -0.02 | 0.024 | N/A   |
| hsa-miR-4448     | 2942-2948 | 7mer-m8 | -0.02 | 45 | -0.02 | 0     | N/A   |
| hsa-miR-3139     | 2946-2952 | 7mer-m8 | -0.07 | 64 | -0.06 | 0.482 | N/A   |
| hsa-miR-28-5p    | 2946-2952 | 7mer-m8 | -0.02 | 27 | -0.02 | 0.482 | N/A   |
| hsa-miR-708-5p   | 2946-2952 | 7mer-m8 | -0.02 | 27 | -0.02 | 0.482 | N/A   |
| hsa-miR-877-5p   | 2949-2956 | 8mer    | -0.03 | 37 | -0.03 | 0.069 | N/A   |
| hsa-miR-6859-5p  | 2949-2955 | 7mer-1A | -0.01 | 31 | -0.01 | 0     | N/A   |
| hsa-miR-3125     | 2949-2955 | 7mer-1A | -0.01 | 21 | -0.01 | 0     | N/A   |
| hsa-miR-3916     | 2949-2955 | 7mer-1A | -0.01 | 17 | -0.01 | 0     | N/A   |
| hsa-miR-6866-5p  | 2950-2956 | 7mer-1A | -0.09 | 69 | -0.08 | 0     | N/A   |
| hsa-miR-3622b-5p | 2962-2968 | 7mer-m8 | -0.03 | 41 | -0.03 | 0     | N/A   |
| hsa-miR-6862-5p  | 2963-2969 | 7mer-m8 | -0.05 | 38 | -0.05 | 0     | N/A   |
| hsa-miR-4253     | 2963-2969 | 7mer-m8 | -0.02 | 16 | -0.02 | 0     | N/A   |
| hsa-miR-6819-5p  | 2972-2978 | 7mer-m8 | -0.1  | 64 | -0.09 | 0     | N/A   |
| hsa-miR-6737-5p  | 2972-2978 | 7mer-m8 | -0.09 | 62 | -0.08 | 0     | N/A   |
| hsa-miR-6812-5p  | 2972-2978 | 7mer-m8 | -0.09 | 62 | -0.08 | 0     | N/A   |
| hsa-miR-342-5p   | 2972-2978 | 7mer-1A | -0.04 | 45 | -0.03 | 0.085 | N/A   |
| hsa-miR-4651     | 2972-2978 | 7mer-1A | -0.08 | 40 | -0.06 | 0     | N/A   |
| hsa-miR-608      | 2972-2978 | 7mer-1A | -0.08 | 39 | -0.07 | 0     | N/A   |
| hsa-miR-6747-5p  | 2972-2978 | 7mer-1A | -0.03 | 26 | -0.02 | 0     | N/A   |
| hsa-miR-4664-5p  | 2972-2978 | 7mer-1A | -0.01 | 25 | -0.01 | 0.085 | N/A   |
| hsa-miR-6890-5p  | 2973-2979 | 7mer-m8 | -0.02 | 21 | -0.02 | 0     | N/A   |
| hsa-miR-3151-3p  | 2983-2990 | 8mer    | -0.03 | 47 | -0.03 | 0     | N/A   |

|                 |           |         |       |    |       |       |     |
|-----------------|-----------|---------|-------|----|-------|-------|-----|
| hsa-miR-3192-3p | 2984-2990 | 7mer-m8 | -0.02 | 58 | -0.02 | 0     | N/A |
| hsa-miR-301a-5p | 2986-2992 | 7mer-1A | -0.01 | 48 | -0.01 | 0     | N/A |
| hsa-miR-301b-5p | 2986-2992 | 7mer-1A | -0.01 | 48 | -0.01 | 0     | N/A |
| hsa-miR-3921    | 2986-2992 | 7mer-1A | -0.01 | 30 | -0.01 | 0     | N/A |
| hsa-miR-4653-5p | 2986-2992 | 7mer-1A | -0.01 | 30 | -0.01 | 0     | N/A |
| hsa-miR-146a-3p | 2986-2992 | 7mer-1A | -0.01 | 22 | -0.01 | 0     | N/A |
| hsa-miR-3191-5p | 2987-2993 | 7mer-1A | -0.01 | 34 | -0.01 | 0     | N/A |
| hsa-miR-942-5p  | 2988-2994 | 7mer-m8 | -0.02 | 38 | -0.02 | 0.024 | N/A |
| hsa-miR-5088-3p | 2990-2997 | 8mer    | -0.03 | 49 | -0.03 | 0     | N/A |
| hsa-miR-6866-3p | 2992-2998 | 7mer-m8 | -0.02 | 43 | -0.02 | 0.221 | N/A |
| hsa-miR-188-5p  | 2992-2998 | 7mer-m8 | -0.02 | 31 | -0.02 | 0.221 | N/A |
| hsa-miR-6729-3p | 2994-3000 | 7mer-1A | -0.07 | 66 | -0.06 | 0     | N/A |
| hsa-miR-6870-3p | 2995-3001 | 7mer-m8 | -0.02 | 56 | -0.02 | 0     | N/A |
| hsa-miR-4432    | 2999-3005 | 7mer-m8 | -0.02 | 52 | -0.02 | 0     | N/A |
| hsa-miR-5197-3p | 3002-3008 | 7mer-1A | -0.01 | 39 | -0.01 | 0     | N/A |
| hsa-miR-3976    | 3011-3017 | 7mer-1A | -0.12 | 72 | -0.1  | 0     | N/A |
| hsa-miR-378d    | 3027-3033 | 7mer-m8 | -0.02 | 27 | -0.02 | 0.705 | N/A |
| hsa-miR-378i    | 3027-3033 | 7mer-m8 | -0.02 | 27 | -0.02 | 0.705 | N/A |
| hsa-miR-378a-3p | 3027-3033 | 7mer-m8 | -0.02 | 27 | -0.02 | 0.705 | N/A |
| hsa-miR-378h    | 3027-3033 | 7mer-m8 | -0.02 | 27 | -0.02 | 0.705 | N/A |
| hsa-miR-422a    | 3027-3033 | 7mer-m8 | -0.02 | 27 | -0.02 | 0.705 | N/A |
| hsa-miR-378b    | 3027-3033 | 7mer-m8 | -0.02 | 27 | -0.02 | 0.705 | N/A |
| hsa-miR-378e    | 3027-3033 | 7mer-m8 | -0.02 | 27 | -0.02 | 0.705 | N/A |
| hsa-miR-378c    | 3027-3033 | 7mer-m8 | -0.02 | 27 | -0.02 | 0.705 | N/A |
| hsa-miR-378f    | 3027-3033 | 7mer-m8 | -0.02 | 27 | -0.02 | 0.705 | N/A |

|                  |           |         |       |    |       |       |          |
|------------------|-----------|---------|-------|----|-------|-------|----------|
| hsa-miR-3690     | 3028-3034 | 7mer-m8 | -0.1  | 81 | -0.08 | 0     | N/A      |
| hsa-miR-619-3p   | 3029-3035 | 7mer-m8 | -0.02 | 34 | -0.02 | 0.024 | N/A      |
| hsa-miR-490-3p   | 3030-3036 | 7mer-m8 | -0.02 | 37 | -0.02 | 1.196 | <<br>0.1 |
| hsa-miR-7106-3p  | 3043-3049 | 7mer-1A | -0.11 | 66 | -0.09 | 0     | N/A      |
| hsa-miR-128-3p   | 3048-3054 | 7mer-m8 | -0.02 | 40 | -0.02 | 0.678 | <<br>0.1 |
| hsa-miR-216a-3p  | 3048-3054 | 7mer-m8 | -0.02 | 38 | -0.02 | 0.678 | <<br>0.1 |
| hsa-miR-3681-3p  | 3048-3054 | 7mer-m8 | -0.02 | 36 | -0.02 | 0.678 | <<br>0.1 |
| hsa-miR-140-3p.1 | 3050-3056 | 7mer-1A | -0.01 | 33 | -0.01 | 0.506 | <<br>0.1 |
| hsa-miR-324-5p   | 3054-3060 | 7mer-1A | -0.02 | 29 | -0.02 | 0.069 | N/A      |
| hsa-miR-1265     | 3059-3065 | 7mer-1A | -0.01 | 33 | -0.01 | 0.024 | N/A      |
| hsa-miR-2392     | 3059-3065 | 7mer-1A | -0.01 | 31 | -0.01 | 0.024 | N/A      |
| hsa-miR-6826-5p  | 3062-3068 | 7mer-m8 | -0.02 | 35 | -0.02 | 0     | N/A      |
| hsa-miR-4295     | 3066-3072 | 7mer-m8 | -0.02 | 39 | -0.02 | 0.154 | <<br>0.1 |
| hsa-miR-130a-3p  | 3066-3072 | 7mer-m8 | -0.02 | 38 | -0.02 | 0.154 | <<br>0.1 |
| hsa-miR-301b-3p  | 3066-3072 | 7mer-m8 | -0.02 | 37 | -0.02 | 0.154 | <<br>0.1 |
| hsa-miR-301a-3p  | 3066-3072 | 7mer-m8 | -0.02 | 37 | -0.02 | 0.154 | <<br>0.1 |
| hsa-miR-130b-3p  | 3066-3072 | 7mer-m8 | -0.02 | 37 | -0.02 | 0.154 | <        |

|                 |           |         |       |    |       |       |          |
|-----------------|-----------|---------|-------|----|-------|-------|----------|
|                 |           |         |       |    |       |       | 0.1      |
| hsa-miR-3666    | 3066-3072 | 7mer-m8 | -0.02 | 36 | -0.02 | 0.154 | <<br>0.1 |
| hsa-miR-454-3p  | 3066-3072 | 7mer-m8 | -0.02 | 35 | -0.02 | 0.154 | <<br>0.1 |
| hsa-miR-504-3p  | 3068-3075 | 8mer    | -0.03 | 52 | -0.03 | 0     | N/A      |
| hsa-miR-122-5p  | 3069-3075 | 7mer-1A | -0.01 | 18 | -0.01 | 0.22  | <<br>0.1 |
| hsa-miR-3135b   | 3071-3077 | 7mer-m8 | -0.02 | 32 | -0.02 | 0     | N/A      |
| hsa-miR-1207-3p | 3073-3080 | 8mer    | -0.03 | 56 | -0.03 | 0.024 | N/A      |
| hsa-miR-9-5p    | 3085-3091 | 7mer-m8 | -0.02 | 55 | -0.02 | 0.069 | <<br>0.1 |
| hsa-miR-100-3p  | 3089-3095 | 7mer-1A | -0.01 | 37 | -0.01 | 0     | N/A      |
| hsa-miR-545-3p  | 3100-3107 | 8mer    | -0.03 | 48 | -0.03 | 0.099 | N/A      |
| hsa-miR-4291    | 3102-3108 | 7mer-1A | -0.02 | 40 | -0.02 | 0     | N/A      |
| hsa-miR-4511    | 3109-3115 | 7mer-m8 | -0.02 | 56 | -0.02 | 0     | N/A      |
| hsa-miR-5003-5p | 3118-3125 | 8mer    | -0.03 | 35 | -0.03 | 0     | N/A      |
| hsa-miR-224-5p  | 3122-3129 | 8mer    | -0.03 | 69 | -0.03 | 0.126 | N/A      |
| hsa-miR-4483    | 3129-3135 | 7mer-m8 | -0.02 | 48 | -0.02 | 0.024 | N/A      |
| hsa-miR-1293    | 3129-3135 | 7mer-m8 | -0.02 | 26 | -0.02 | 0.024 | N/A      |
| hsa-miR-4651    | 3130-3136 | 7mer-m8 | -0.11 | 48 | -0.09 | 0.437 | N/A      |
| hsa-miR-608     | 3130-3136 | 7mer-m8 | -0.09 | 42 | -0.08 | 0.437 | N/A      |
| hsa-miR-6782-5p | 3131-3137 | 7mer-m8 | -0.09 | 59 | -0.08 | 0     | N/A      |
| hsa-miR-6722-3p | 3133-3139 | 7mer-m8 | -0.13 | 72 | -0.11 | 0     | N/A      |
| hsa-miR-1909-3p | 3133-3139 | 7mer-m8 | -0.11 | 68 | -0.1  | 0     | N/A      |

|                 |           |         |       |    |       |       |     |
|-----------------|-----------|---------|-------|----|-------|-------|-----|
| hsa-miR-4763-3p | 3134-3140 | 7mer-m8 | -0.11 | 71 | -0.09 | 0     | N/A |
| hsa-miR-1207-5p | 3134-3140 | 7mer-m8 | -0.1  | 71 | -0.09 | 0     | N/A |
| hsa-miR-6808-5p | 3135-3141 | 7mer-m8 | -0.02 | 43 | -0.02 | 0.024 | N/A |
| hsa-miR-940     | 3135-3141 | 7mer-m8 | -0.02 | 43 | -0.02 | 0.024 | N/A |
| hsa-miR-6893-5p | 3135-3141 | 7mer-m8 | -0.02 | 43 | -0.02 | 0.024 | N/A |
| hsa-miR-1827    | 3136-3143 | 8mer    | -0.12 | 70 | -0.1  | 0.024 | N/A |
| hsa-miR-4316    | 3138-3145 | 8mer    | -0.03 | 58 | -0.03 | 0     | N/A |
| hsa-miR-1294    | 3139-3145 | 7mer-1A | -0.01 | 17 | -0.01 | 0.024 | N/A |
| hsa-miR-17-3p   | 3146-3153 | 8mer    | -0.03 | 62 | -0.03 | 0.402 | N/A |
| hsa-miR-3158-5p | 3147-3153 | 7mer-1A | -0.11 | 85 | -0.09 | 0.085 | N/A |
| hsa-miR-1205    | 3147-3153 | 7mer-1A | -0.03 | 59 | -0.02 | 0.024 | N/A |
| hsa-miR-1184    | 3147-3153 | 7mer-1A | -0.01 | 44 | -0.01 | 0.099 | N/A |
| hsa-miR-632     | 3149-3155 | 7mer-m8 | -0.09 | 86 | -0.08 | 0.099 | N/A |
| hsa-miR-4288    | 3149-3155 | 7mer-m8 | -0.13 | 85 | -0.11 | 0.099 | N/A |
| hsa-miR-346     | 3149-3155 | 7mer-1A | -0.04 | 38 | -0.03 | 1.967 | N/A |
| hsa-miR-654-3p  | 3150-3157 | 8mer    | -0.03 | 50 | -0.03 | 0.099 | N/A |
| hsa-miR-6756-3p | 3157-3163 | 7mer-1A | -0.06 | 60 | -0.05 | 0     | N/A |
| hsa-miR-3127-3p | 3157-3163 | 7mer-1A | -0.03 | 45 | -0.02 | 0     | N/A |
| hsa-miR-5588-3p | 3160-3166 | 7mer-1A | -0.09 | 67 | -0.08 | 0     | N/A |
| hsa-miR-2114-5p | 3160-3166 | 7mer-1A | -0.01 | 17 | -0.01 | 0     | N/A |
| hsa-miR-4639-5p | 3174-3180 | 7mer-m8 | -0.02 | 40 | -0.02 | 0     | N/A |
| hsa-miR-6893-3p | 3177-3183 | 7mer-1A | -0.12 | 75 | -0.1  | 0.154 | N/A |
| hsa-miR-370-3p  | 3177-3183 | 7mer-1A | -0.06 | 71 | -0.05 | 0.154 | N/A |
| hsa-miR-3074-5p | 3178-3185 | 8mer    | -0.03 | 77 | -0.03 | 0     | N/A |
| hsa-miR-7152-5p | 3179-3185 | 7mer-1A | -0.02 | 53 | -0.02 | 0     | N/A |

|                  |           |         |       |    |       |       |          |
|------------------|-----------|---------|-------|----|-------|-------|----------|
| hsa-miR-3124-3p  | 3180-3186 | 7mer-m8 | -0.02 | 37 | -0.02 | 0     | N/A      |
| hsa-miR-515-3p   | 3185-3191 | 7mer-m8 | -0.02 | 35 | -0.02 | 0.024 | N/A      |
| hsa-miR-33b-3p   | 3185-3191 | 7mer-m8 | -0.02 | 30 | -0.02 | 0.024 | N/A      |
| hsa-miR-519e-3p  | 3185-3191 | 7mer-m8 | -0.02 | 21 | -0.02 | 0.024 | N/A      |
| hsa-miR-1825     | 3187-3193 | 7mer-m8 | -0.09 | 78 | -0.07 | 0.024 | N/A      |
| hsa-miR-589-5p   | 3192-3199 | 8mer    | -0.03 | 56 | -0.03 | 0.099 | N/A      |
| hsa-miR-146b-5p  | 3193-3199 | 7mer-1A | -0.01 | 18 | -0.01 | 1.269 | 0.1<br>2 |
| hsa-miR-7153-5p  | 3193-3199 | 7mer-1A | -0.01 | 18 | -0.01 | 1.269 | 0.1<br>2 |
| hsa-miR-146a-5p  | 3193-3199 | 7mer-1A | -0.01 | 18 | -0.01 | 1.269 | 0.1<br>2 |
| hsa-miR-580-3p   | 3194-3200 | 7mer-1A | -0.01 | 36 | -0.01 | 0.024 | N/A      |
| hsa-miR-4780     | 3197-3203 | 7mer-m8 | -0.02 | 19 | -0.02 | 0     | N/A      |
| hsa-miR-1249-3p  | 3199-3205 | 7mer-m8 | -0.07 | 25 | -0.06 | 0.058 | N/A      |
| hsa-miR-4632-3p  | 3201-3207 | 7mer-m8 | -0.19 | 64 | -0.16 | 0     | N/A      |
| hsa-miR-6746-3p  | 3202-3208 | 7mer-m8 | -0.1  | 55 | -0.09 | 0     | N/A      |
| hsa-miR-4632-5p  | 3207-3213 | 7mer-m8 | -0.02 | 40 | -0.02 | 0.335 | N/A      |
| hsa-miR-7843-5p  | 3207-3213 | 7mer-m8 | -0.02 | 39 | -0.02 | 0.335 | N/A      |
| hsa-miR-6879-5p  | 3207-3213 | 7mer-m8 | -0.02 | 31 | -0.02 | 0.335 | N/A      |
| hsa-miR-4436b-3p | 3207-3213 | 7mer-m8 | -0.02 | 30 | -0.02 | 0.335 | N/A      |
| hsa-miR-6735-5p  | 3207-3213 | 7mer-m8 | -0.02 | 30 | -0.02 | 0.335 | N/A      |
| hsa-miR-6814-5p  | 3211-3218 | 8mer    | -0.09 | 79 | -0.08 | 0     | N/A      |
| hsa-miR-4699-5p  | 3218-3224 | 7mer-m8 | -0.02 | 35 | -0.02 | 0     | N/A      |
| hsa-miR-3649     | 3226-3232 | 7mer-1A | -0.06 | 45 | -0.05 | 0     | N/A      |

|                  |           |         |       |    |       |       |     |
|------------------|-----------|---------|-------|----|-------|-------|-----|
| hsa-miR-3122     | 3227-3233 | 7mer-m8 | -0.02 | 77 | -0.02 | 0.085 | N/A |
| hsa-miR-4298     | 3227-3233 | 7mer-1A | -0.11 | 71 | -0.09 | 0.024 | N/A |
| hsa-miR-3913-5p  | 3227-3233 | 7mer-m8 | -0.02 | 68 | -0.02 | 0.085 | N/A |
| hsa-miR-1302     | 3227-3233 | 7mer-1A | -0.09 | 66 | -0.08 | 0.024 | N/A |
| hsa-miR-4425     | 3228-3234 | 7mer-m8 | -0.02 | 6  | -0.02 | 0     | N/A |
| hsa-miR-92a-1-5p | 3229-3236 | 8mer    | -0.13 | 60 | -0.11 | 0     | N/A |
| hsa-miR-29b-1-5p | 3232-3238 | 7mer-1A | -0.01 | 30 | -0.01 | 0     | N/A |
| hsa-miR-6830-3p  | 3237-3243 | 7mer-m8 | -0.02 | 54 | -0.02 | 0     | N/A |
| hsa-miR-449b-3p  | 3244-3250 | 7mer-m8 | -0.02 | 30 | -0.02 | 0     | N/A |
| hsa-miR-551b-5p  | 3250-3256 | 7mer-m8 | -0.02 | 62 | -0.02 | 0     | N/A |
| hsa-miR-539-5p   | 3255-3261 | 7mer-1A | -0.01 | 46 | -0.01 | 0.099 | N/A |
| hsa-miR-4251     | 3256-3262 | 7mer-m8 | -0.02 | 36 | -0.02 | 0     | N/A |
| hsa-miR-4324     | 3257-3263 | 7mer-m8 | -0.02 | 35 | -0.02 | 0     | N/A |
| hsa-miR-3622b-3p | 3259-3265 | 7mer-m8 | -0.02 | 38 | -0.02 | 0     | N/A |
| hsa-miR-3622a-3p | 3259-3265 | 7mer-m8 | -0.02 | 34 | -0.02 | 0     | N/A |
| hsa-miR-6804-3p  | 3260-3267 | 8mer    | -0.03 | 33 | -0.03 | 0     | N/A |
| hsa-miR-500a-3p  | 3261-3267 | 7mer-m8 | -0.02 | 24 | -0.02 | 0.085 | N/A |
| hsa-miR-3130-3p  | 3262-3268 | 7mer-m8 | -0.02 | 61 | -0.02 | 0     | N/A |
| hsa-miR-6829-5p  | 3265-3272 | 8mer    | -0.03 | 48 | -0.03 | 0     | N/A |
| hsa-miR-5001-5p  | 3266-3272 | 7mer-1A | -0.06 | 44 | -0.05 | 0.099 | N/A |
| hsa-miR-3620-5p  | 3266-3272 | 7mer-m8 | -0.02 | 40 | -0.02 | 0     | N/A |
| hsa-miR-4675     | 3266-3272 | 7mer-1A | -0.01 | 34 | -0.01 | 0     | N/A |
| hsa-miR-4498     | 3266-3272 | 7mer-1A | -0.03 | 32 | -0.03 | 0.099 | N/A |
| hsa-miR-1587     | 3266-3272 | 7mer-m8 | -0.02 | 30 | -0.02 | 0     | N/A |
| hsa-miR-4492     | 3266-3272 | 7mer-1A | -0.01 | 29 | -0.01 | 0.099 | N/A |

|                 |           |         |       |    |       |       |     |
|-----------------|-----------|---------|-------|----|-------|-------|-----|
| hsa-miR-762     | 3266-3272 | 7mer-1A | -0.01 | 27 | -0.01 | 0.099 | N/A |
| hsa-miR-4741    | 3266-3272 | 7mer-1A | -0.01 | 22 | -0.01 | 0     | N/A |
| hsa-miR-4656    | 3266-3272 | 7mer-1A | -0.01 | 9  | -0.01 | 0     | N/A |
| hsa-miR-378g    | 3267-3273 | 7mer-m8 | -0.02 | 39 | -0.02 | 0     | N/A |
| hsa-miR-5787    | 3269-3275 | 7mer-m8 | -0.02 | 41 | -0.02 | 0     | N/A |
| hsa-miR-4505    | 3269-3275 | 7mer-m8 | -0.02 | 25 | -0.02 | 0     | N/A |
| hsa-miR-6768-3p | 3280-3286 | 7mer-m8 | -0.02 | 52 | -0.02 | 0     | N/A |
| hsa-miR-4766-5p | 3285-3291 | 7mer-1A | -0.01 | 43 | -0.01 | 0.489 | N/A |
| hsa-miR-146a-3p | 3286-3292 | 7mer-m8 | -0.02 | 30 | -0.02 | 0     | N/A |
| hsa-miR-6805-3p | 3288-3294 | 7mer-m8 | -0.02 | 38 | -0.02 | 0     | N/A |
| hsa-miR-5691    | 3288-3294 | 7mer-m8 | -0.02 | 35 | -0.02 | 0     | N/A |
| hsa-miR-3194-3p | 3288-3294 | 7mer-1A | -0.01 | 30 | -0.01 | 0     | N/A |
| hsa-miR-3907    | 3290-3296 | 7mer-m8 | -0.12 | 72 | -0.1  | 0     | N/A |
| hsa-miR-342-5p  | 3292-3298 | 7mer-m8 | -0.13 | 77 | -0.11 | 0.085 | N/A |
| hsa-miR-4664-5p | 3292-3298 | 7mer-m8 | -0.11 | 77 | -0.09 | 0.085 | N/A |
| hsa-miR-6842-5p | 3293-3299 | 7mer-m8 | -0.14 | 48 | -0.12 | 0     | N/A |
| hsa-miR-7110-5p | 3293-3299 | 7mer-m8 | -0.12 | 42 | -0.1  | 0     | N/A |
| hsa-miR-6752-5p | 3293-3299 | 7mer-m8 | -0.06 | 33 | -0.05 | 0     | N/A |
| hsa-miR-6732-5p | 3294-3300 | 7mer-m8 | -0.06 | 41 | -0.05 | 0     | N/A |
| hsa-miR-6798-5p | 3295-3301 | 7mer-m8 | -0.07 | 63 | -0.06 | 0.085 | N/A |
| hsa-miR-6753-5p | 3297-3303 | 7mer-m8 | -0.06 | 59 | -0.05 | 0     | N/A |
| hsa-miR-106a-3p | 3305-3311 | 7mer-1A | -0.01 | 32 | -0.01 | 0     | N/A |
| hsa-miR-4684-3p | 3306-3313 | 8mer    | -0.03 | 33 | -0.03 | 0     | N/A |
| hsa-miR-409-3p  | 3309-3315 | 7mer-m8 | -0.02 | 71 | -0.02 | 0.154 | N/A |
| hsa-miR-6508-5p | 3324-3331 | 8mer    | -0.03 | 46 | -0.03 | 0     | N/A |

|                 |           |               |       |     |       |       |     |
|-----------------|-----------|---------------|-------|-----|-------|-------|-----|
| hsa-miR-8067    | 3324-3331 | 8mer          | -0.03 | 46  | -0.03 | 0     | N/A |
| hsa-miR-519c-5p | 3326-3332 | 7mer-1A       | -0.01 | 32  | -0.01 | 0.024 | N/A |
| hsa-miR-522-5p  | 3326-3332 | 7mer-1A       | -0.01 | 32  | -0.01 | 0.024 | N/A |
| hsa-miR-523-5p  | 3326-3332 | 7mer-1A       | -0.01 | 32  | -0.01 | 0.024 | N/A |
| hsa-miR-519a-5p | 3326-3332 | 7mer-1A       | -0.01 | 32  | -0.01 | 0.024 | N/A |
| hsa-miR-518e-5p | 3326-3332 | 7mer-1A       | -0.01 | 32  | -0.01 | 0.024 | N/A |
| hsa-miR-519b-5p | 3326-3332 | 7mer-1A       | -0.01 | 32  | -0.01 | 0.024 | N/A |
| hsa-miR-518d-5p | 3326-3332 | 7mer-1A       | -0.01 | 30  | -0.01 | 0.024 | N/A |
| hsa-miR-518f-5p | 3326-3332 | 7mer-1A       | -0.01 | 30  | -0.01 | 0.024 | N/A |
| hsa-miR-526a    | 3326-3332 | 7mer-1A       | -0.01 | 30  | -0.01 | 0.024 | N/A |
| hsa-miR-520c-5p | 3326-3332 | 7mer-1A       | -0.01 | 30  | -0.01 | 0.024 | N/A |
| hsa-miR-4777-5p | 3326-3332 | 7mer-1A       | -0.01 | 27  | -0.01 | 0     | N/A |
| hsa-miR-4802-5p | 3326-3337 | non-canonical | N/A   | N/A | N/A   | 0     | N/A |
| hsa-miR-4802-5p | 3326-3337 | non-canonical | N/A   | N/A | N/A   | 0     | N/A |
| hsa-miR-182-3p  | 3328-3334 | 7mer-m8       | -0.02 | 19  | -0.02 | 0     | N/A |
| hsa-miR-4257    | 3332-3338 | 7mer-m8       | -0.02 | 48  | -0.02 | 0     | N/A |
| hsa-miR-3922-5p | 3332-3343 | non-canonical | N/A   | N/A | N/A   | 0     | N/A |
| hsa-miR-3922-5p | 3332-3343 | non-canonical | N/A   | N/A | N/A   | 0     | N/A |
| hsa-miR-4717-5p | 3337-3343 | 7mer-1A       | -0.01 | 39  | -0.01 | 0     | N/A |
| hsa-miR-15a-3p  | 3337-3343 | 7mer-1A       | -0.01 | 28  | -0.01 | 0     | N/A |
| hsa-miR-5704    | 3337-3344 | 8mer          | -0.03 | 7   | -0.03 | 0     | N/A |

|                 |           |         |       |    |       |       |     |
|-----------------|-----------|---------|-------|----|-------|-------|-----|
| hsa-miR-1295a   | 3338-3344 | 7mer-1A | -0.12 | 68 | -0.1  | 0.024 | N/A |
| hsa-miR-3667-3p | 3345-3351 | 7mer-m8 | -0.02 | 34 | -0.02 | 0     | N/A |
| hsa-miR-6886-3p | 3347-3353 | 7mer-m8 | -0.02 | 35 | -0.02 | 0     | N/A |
| hsa-miR-6851-3p | 3348-3354 | 7mer-m8 | -0.02 | 28 | -0.02 | 0     | N/A |
| hsa-miR-1911-3p | 3352-3358 | 7mer-m8 | -0.02 | 33 | -0.02 | 0     | N/A |
| hsa-miR-4733-3p | 3353-3359 | 7mer-m8 | -0.02 | 39 | -0.02 | 0     | N/A |
| hsa-miR-1260b   | 3356-3362 | 7mer-m8 | -0.02 | 33 | -0.02 | 0     | N/A |
| hsa-miR-1260a   | 3356-3362 | 7mer-m8 | -0.02 | 33 | -0.02 | 0     | N/A |
| hsa-miR-1224-3p | 3356-3362 | 7mer-1A | -0.01 | 30 | -0.01 | 0     | N/A |
| hsa-miR-5697    | 3364-3370 | 7mer-m8 | -0.02 | 38 | -0.02 | 0     | N/A |
| hsa-miR-4480    | 3366-3373 | 8mer    | -0.03 | 50 | -0.03 | 0     | N/A |
| hsa-miR-1909-5p | 3370-3376 | 7mer-m8 | -0.06 | 64 | -0.05 | 0     | N/A |
| hsa-miR-361-3p  | 3378-3384 | 7mer-m8 | -0.02 | 27 | -0.02 | 0.099 | N/A |
| hsa-miR-874-5p  | 3382-3388 | 7mer-1A | -0.01 | 5  | -0.01 | 0.085 | N/A |
| hsa-miR-663b    | 3383-3389 | 7mer-m8 | -0.02 | 42 | -0.02 | 0.024 | N/A |
| hsa-miR-4651    | 3386-3392 | 7mer-m8 | -0.02 | 18 | -0.02 | 0     | N/A |
| hsa-miR-608     | 3386-3392 | 7mer-m8 | -0.02 | 15 | -0.02 | 0     | N/A |
| hsa-miR-6752-5p | 3387-3393 | 7mer-m8 | -0.02 | 16 | -0.02 | 0     | N/A |
| hsa-miR-7110-5p | 3387-3393 | 7mer-m8 | -0.02 | 10 | -0.02 | 0     | N/A |
| hsa-miR-6842-5p | 3387-3393 | 7mer-m8 | -0.02 | 9  | -0.02 | 0     | N/A |
| hsa-miR-7109-5p | 3389-3395 | 7mer-m8 | -0.02 | 30 | -0.02 | 0     | N/A |
| hsa-miR-6885-5p | 3389-3395 | 7mer-1A | -0.05 | 24 | -0.04 | 0     | N/A |
| hsa-miR-328-5p  | 3389-3395 | 7mer-1A | -0.01 | 14 | -0.01 | 0     | N/A |
| hsa-miR-6887-5p | 3389-3395 | 7mer-1A | -0.01 | 1  | -0.01 | 0     | N/A |
| hsa-miR-6795-5p | 3389-3395 | 7mer-1A | -0.01 | 1  | -0.01 | 0     | N/A |

|                  |           |         |       |    |       |       |          |
|------------------|-----------|---------|-------|----|-------|-------|----------|
| hsa-miR-637      | 3390-3396 | 7mer-m8 | -0.02 | 34 | -0.02 | 0.024 | N/A      |
| hsa-miR-183-5p.2 | 3395-3401 | 7mer-m8 | -0.02 | 27 | -0.02 | 0.154 | <<br>0.1 |
| hsa-miR-891a-3p  | 3396-3402 | 7mer-m8 | -0.05 | 57 | -0.04 | 0     | N/A      |
| hsa-miR-4693-3p  | 3400-3407 | 8mer    | -0.03 | 29 | -0.03 | 0     | N/A      |
| hsa-miR-3174     | 3404-3410 | 7mer-1A | -0.01 | 35 | -0.01 | 0     | N/A      |
| hsa-miR-921      | 3404-3410 | 7mer-m8 | -0.02 | 23 | -0.02 | 0     | N/A      |
| hsa-miR-6847-5p  | 3413-3419 | 7mer-1A | -0.07 | 68 | -0.06 | 0     | N/A      |
| hsa-miR-4257     | 3413-3419 | 7mer-1A | -0.01 | 37 | -0.01 | 0     | N/A      |
| hsa-miR-4295     | 3420-3426 | 7mer-m8 | -0.02 | 39 | -0.02 | 0.623 | <<br>0.1 |
| hsa-miR-130a-3p  | 3420-3426 | 7mer-m8 | -0.02 | 38 | -0.02 | 0.623 | <<br>0.1 |
| hsa-miR-301b-3p  | 3420-3426 | 7mer-m8 | -0.02 | 37 | -0.02 | 0.623 | <<br>0.1 |
| hsa-miR-130b-3p  | 3420-3426 | 7mer-m8 | -0.02 | 37 | -0.02 | 0.623 | <<br>0.1 |
| hsa-miR-301a-3p  | 3420-3426 | 7mer-m8 | -0.02 | 37 | -0.02 | 0.623 | <<br>0.1 |
| hsa-miR-3666     | 3420-3426 | 7mer-m8 | -0.02 | 36 | -0.02 | 0.623 | <<br>0.1 |
| hsa-miR-454-3p   | 3420-3426 | 7mer-m8 | -0.02 | 35 | -0.02 | 0.623 | <<br>0.1 |
| hsa-miR-519c-3p  | 3421-3427 | 7mer-m8 | -0.02 | 25 | -0.02 | 0.571 | N/A      |
| hsa-miR-519a-3p  | 3421-3427 | 7mer-m8 | -0.02 | 25 | -0.02 | 0.571 | N/A      |
| hsa-miR-519b-3p  | 3421-3427 | 7mer-m8 | -0.02 | 25 | -0.02 | 0.571 | N/A      |

|                       |           |         |       |    |       |       |     |
|-----------------------|-----------|---------|-------|----|-------|-------|-----|
| hsa-miR-125b-2-3<br>p | 3424-3430 | 7mer-m8 | -0.02 | 49 | -0.02 | 0.442 | N/A |
| hsa-miR-4731-3p       | 3425-3432 | 8mer    | -0.03 | 70 | -0.03 | 0     | N/A |
| hsa-miR-4801          | 3425-3432 | 8mer    | -0.03 | 66 | -0.03 | 0     | N/A |
| hsa-miR-155-3p        | 3429-3435 | 7mer-m8 | -0.02 | 13 | -0.02 | 0     | N/A |
| hsa-miR-4793-5p       | 3432-3438 | 7mer-1A | -0.03 | 53 | -0.03 | 0     | N/A |
| hsa-miR-5196-3p       | 3432-3438 | 7mer-1A | -0.01 | 38 | -0.01 | 0     | N/A |
| hsa-miR-1226-3p       | 3440-3446 | 7mer-m8 | -0.02 | 51 | -0.02 | 0.024 | N/A |
| hsa-miR-500b-3p       | 3445-3451 | 7mer-1A | -0.01 | 37 | -0.01 | 0     | N/A |
| hsa-miR-6884-3p       | 3448-3454 | 7mer-m8 | -0.02 | 50 | -0.02 | 0     | N/A |
| hsa-miR-4682          | 3456-3462 | 7mer-m8 | -0.02 | 44 | -0.02 | 0     | N/A |
| hsa-miR-8077          | 3457-3464 | 8mer    | -0.03 | 73 | -0.03 | 0     | N/A |
| hsa-miR-4663          | 3458-3464 | 7mer-1A | -0.01 | 41 | -0.01 | 0     | N/A |
| hsa-miR-7160-5p       | 3458-3464 | 7mer-1A | -0.01 | 23 | -0.01 | 0     | N/A |
| hsa-miR-6851-5p       | 3463-3469 | 7mer-m8 | -0.07 | 50 | -0.06 | 0     | N/A |
| hsa-miR-3689d         | 3463-3469 | 7mer-m8 | -0.02 | 35 | -0.02 | 0     | N/A |
| hsa-miR-6799-5p       | 3464-3470 | 7mer-m8 | -0.02 | 53 | -0.02 | 0     | N/A |
| hsa-miR-6825-5p       | 3465-3471 | 7mer-m8 | -0.08 | 44 | -0.07 | 0     | N/A |
| hsa-miR-6738-5p       | 3468-3474 | 7mer-1A | -0.08 | 65 | -0.07 | 0     | N/A |
| hsa-miR-6734-5p       | 3468-3474 | 7mer-m8 | -0.06 | 55 | -0.05 | 0     | N/A |
| hsa-miR-5194          | 3468-3474 | 7mer-1A | -0.03 | 35 | -0.03 | 0     | N/A |
| hsa-miR-1914-3p       | 3468-3474 | 7mer-1A | -0.01 | 34 | -0.01 | 0     | N/A |
| hsa-miR-423-5p        | 3468-3474 | 7mer-1A | -0.01 | 22 | -0.01 | 0.814 | N/A |
| hsa-miR-3184-5p       | 3468-3474 | 7mer-1A | -0.01 | 22 | -0.01 | 0.814 | N/A |
| hsa-miR-544b          | 3470-3476 | 7mer-m8 | -0.02 | 33 | -0.02 | 0     | N/A |

|                  |           |         |       |    |       |       |       |
|------------------|-----------|---------|-------|----|-------|-------|-------|
| hsa-miR-5001-3p  | 3474-3481 | 8mer    | -0.03 | 43 | -0.03 | 0     | N/A   |
| hsa-miR-4727-5p  | 3475-3481 | 7mer-1A | -0.08 | 61 | -0.06 | 0     | N/A   |
| hsa-miR-6738-3p  | 3475-3482 | 8mer    | -0.03 | 52 | -0.03 | 0     | N/A   |
| hsa-miR-544a     | 3476-3482 | 7mer-1A | -0.05 | 51 | -0.04 | 0     | N/A   |
| hsa-miR-627-3p   | 3478-3485 | 8mer    | -0.03 | 57 | -0.03 | 0     | N/A   |
| hsa-miR-1245b-3p | 3487-3493 | 7mer-m8 | -0.02 | 30 | -0.02 | 0     | N/A   |
| hsa-miR-5683     | 3488-3494 | 7mer-m8 | -0.02 | 42 | -0.02 | 0     | N/A   |
| hsa-miR-140-3p.1 | 3491-3497 | 7mer-1A | -0.01 | 33 | -0.01 | 0.154 | < 0.1 |
| hsa-miR-3928-5p  | 3496-3503 | 8mer    | -0.03 | 59 | -0.03 | 0.085 | N/A   |
| hsa-miR-6806-3p  | 3496-3503 | 8mer    | -0.03 | 58 | -0.03 | 0.085 | N/A   |
| hsa-miR-127-5p   | 3497-3504 | 8mer    | -0.03 | 49 | -0.03 | 0     | N/A   |
| hsa-miR-7843-3p  | 3498-3504 | 7mer-1A | -0.01 | 30 | -0.01 | 0     | N/A   |
| hsa-miR-1248     | 3505-3511 | 7mer-m8 | -0.02 | 39 | -0.02 | 0.024 | N/A   |
| hsa-miR-5088-3p  | 3506-3512 | 7mer-m8 | -0.02 | 35 | -0.02 | 0     | N/A   |
| hsa-miR-3127-3p  | 3507-3513 | 7mer-m8 | -0.06 | 60 | -0.05 | 0     | N/A   |
| hsa-miR-6756-3p  | 3507-3513 | 7mer-m8 | -0.06 | 59 | -0.05 | 0     | N/A   |
| hsa-miR-4645-5p  | 3513-3519 | 7mer-1A | -0.01 | 25 | -0.01 | 0     | N/A   |
| hsa-miR-4673     | 3513-3519 | 7mer-1A | -0.01 | 19 | -0.01 | 0     | N/A   |
| hsa-miR-508-5p   | 3515-3521 | 7mer-m8 | -0.02 | 33 | -0.02 | 0     | N/A   |
| hsa-miR-3678-3p  | 3522-3528 | 7mer-m8 | -0.02 | 38 | -0.02 | 0     | N/A   |
| hsa-miR-2467-3p  | 3522-3528 | 7mer-1A | -0.01 | 29 | -0.01 | 0     | N/A   |
| hsa-miR-3158-5p  | 3523-3530 | 8mer    | -0.03 | 57 | -0.03 | 0.085 | N/A   |
| hsa-miR-1184     | 3524-3530 | 7mer-1A | -0.01 | 44 | -0.01 | 0.099 | N/A   |
| hsa-miR-1205     | 3524-3530 | 7mer-1A | -0.01 | 39 | -0.01 | 0.024 | N/A   |

|                   |           |         |       |    |       |       |     |
|-------------------|-----------|---------|-------|----|-------|-------|-----|
| hsa-miR-17-3p     | 3524-3530 | 7mer-1A | -0.01 | 35 | -0.01 | 0.099 | N/A |
| hsa-miR-4527      | 3526-3533 | 8mer    | -0.11 | 77 | -0.09 | 0     | N/A |
| hsa-miR-6503-5p   | 3526-3533 | 8mer    | -0.1  | 72 | -0.08 | 0     | N/A |
| hsa-miR-7107-3p   | 3527-3533 | 7mer-1A | -0.06 | 60 | -0.05 | 0     | N/A |
| hsa-miR-6753-3p   | 3527-3533 | 7mer-1A | -0.04 | 43 | -0.03 | 0     | N/A |
| hsa-miR-6848-3p   | 3528-3534 | 7mer-1A | -0.01 | 40 | -0.01 | 0     | N/A |
| hsa-miR-6843-3p   | 3528-3534 | 7mer-1A | -0.01 | 29 | -0.01 | 0     | N/A |
| hsa-miR-219b-3p   | 3532-3538 | 7mer-1A | -0.01 | 29 | -0.01 | 0     | N/A |
| hsa-miR-219a-2-3p | 3532-3538 | 7mer-1A | -0.01 | 21 | -0.01 | 0.58  | N/A |
| hsa-miR-4452      | 3533-3539 | 7mer-1A | -0.01 | 46 | -0.01 | 0     | N/A |
| hsa-miR-183-3p    | 3533-3539 | 7mer-1A | -0.01 | 43 | -0.01 | 0.085 | N/A |
| hsa-miR-4507      | 3537-3544 | 8mer    | -0.13 | 78 | -0.11 | 0     | N/A |
| hsa-miR-3940-5p   | 3537-3544 | 8mer    | -0.04 | 65 | -0.03 | 0     | N/A |
| hsa-miR-6839-3p   | 3538-3544 | 7mer-1A | -0.01 | 21 | -0.01 | 0     | N/A |
| hsa-miR-4740-3p   | 3546-3552 | 7mer-m8 | -0.02 | 17 | -0.02 | 0     | N/A |
| hsa-miR-3943      | 3550-3556 | 7mer-m8 | -0.1  | 74 | -0.08 | 0.024 | N/A |
| hsa-miR-1225-3p   | 3551-3557 | 7mer-m8 | -0.07 | 64 | -0.06 | 0.024 | N/A |
| hsa-miR-1276      | 3554-3560 | 7mer-m8 | -0.02 | 69 | -0.02 | 0.024 | N/A |
| hsa-miR-8060      | 3559-3565 | 7mer-1A | -0.01 | 39 | -0.01 | 0     | N/A |
| hsa-miR-7154-5p   | 3559-3565 | 7mer-m8 | -0.02 | 28 | -0.02 | 0     | N/A |
| hsa-miR-15b-3p    | 3562-3568 | 7mer-m8 | -0.02 | 43 | -0.02 | 0.085 | N/A |
| hsa-miR-4641      | 3571-3577 | 7mer-1A | -0.01 | 12 | -0.01 | 0     | N/A |
| hsa-miR-656-5p    | 3574-3581 | 8mer    | -0.12 | 72 | -0.1  | 0     | N/A |
| hsa-miR-504-5p.1  | 3579-3585 | 7mer-m8 | -0.03 | 61 | -0.03 | 0.229 | N/A |

|                 |           |         |       |    |       |       |     |
|-----------------|-----------|---------|-------|----|-------|-------|-----|
| hsa-miR-6732-3p | 3580-3586 | 7mer-m8 | -0.02 | 32 | -0.02 | 0     | N/A |
| hsa-miR-1305    | 3584-3590 | 7mer-m8 | -0.02 | 78 | -0.02 | 0     | N/A |
| hsa-miR-5680    | 3596-3602 | 7mer-1A | -0.01 | 53 | -0.01 | 0     | N/A |
| hsa-miR-8067    | 3597-3603 | 7mer-m8 | -0.02 | 27 | -0.02 | 0     | N/A |
| hsa-miR-6508-5p | 3597-3603 | 7mer-m8 | -0.02 | 27 | -0.02 | 0     | N/A |
| hsa-miR-3667-5p | 3603-3609 | 7mer-m8 | -0.04 | 62 | -0.04 | 0     | N/A |
| hsa-let-7c-3p   | 3613-3620 | 8mer    | -0.03 | 48 | -0.03 | 0     | N/A |
| hsa-let-7g-3p   | 3614-3620 | 7mer-1A | -0.01 | 37 | -0.01 | 0     | N/A |
| hsa-let-7a-2-3p | 3614-3620 | 7mer-1A | -0.01 | 36 | -0.01 | 0     | N/A |
| hsa-miR-493-5p  | 3614-3620 | 7mer-1A | -0.01 | 31 | -0.01 | 0.327 | N/A |
| hsa-miR-643     | 3616-3622 | 7mer-1A | -0.01 | 18 | -0.01 | 0.024 | N/A |
| hsa-miR-7114-3p | 3625-3631 | 7mer-m8 | -0.06 | 65 | -0.05 | 0.085 | N/A |
| hsa-miR-1180-5p | 3625-3631 | 7mer-m8 | -0.02 | 54 | -0.02 | 0.085 | N/A |
| hsa-miR-150-3p  | 3632-3638 | 7mer-m8 | -0.02 | 11 | -0.02 | 0.085 | N/A |
| hsa-miR-4774-5p | 3634-3640 | 7mer-1A | -0.01 | 13 | -0.01 | 0     | N/A |
| hsa-miR-4490    | 3634-3640 | 7mer-1A | -0.01 | 7  | -0.01 | 0     | N/A |
| hsa-miR-6824-3p | 3635-3641 | 7mer-m8 | -0.02 | 50 | -0.02 | 0     | N/A |
| hsa-miR-6764-3p | 3635-3641 | 7mer-m8 | -0.02 | 50 | -0.02 | 0     | N/A |
| hsa-miR-760     | 3637-3643 | 7mer-m8 | -0.02 | 24 | -0.02 | 0.029 | N/A |
| hsa-miR-4283    | 3639-3645 | 7mer-m8 | -0.03 | 45 | -0.03 | 0     | N/A |
| hsa-miR-6846-5p | 3640-3646 | 7mer-m8 | -0.02 | 9  | -0.02 | 0     | N/A |
| hsa-miR-6848-5p | 3640-3646 | 7mer-m8 | -0.02 | 8  | -0.02 | 0     | N/A |
| hsa-miR-301a-5p | 3647-3653 | 7mer-m8 | -0.02 | 68 | -0.02 | 0.085 | N/A |
| hsa-miR-301b-5p | 3647-3653 | 7mer-m8 | -0.02 | 68 | -0.02 | 0.085 | N/A |
| hsa-miR-4714-5p | 3648-3655 | 8mer    | -0.03 | 38 | -0.03 | 0     | N/A |

|                       |           |         |       |    |       |       |          |
|-----------------------|-----------|---------|-------|----|-------|-------|----------|
| hsa-miR-514a-5p       | 3649-3655 | 7mer-1A | -0.01 | 34 | -0.01 | 0.085 | N/A      |
| hsa-miR-3664-5p       | 3649-3655 | 7mer-1A | -0.01 | 25 | -0.01 | 0     | N/A      |
| hsa-miR-6849-3p       | 3663-3669 | 7mer-m8 | -0.03 | 54 | -0.03 | 0     | N/A      |
| hsa-miR-4482-5p       | 3666-3672 | 7mer-1A | -0.06 | 70 | -0.05 | 0     | N/A      |
| hsa-miR-1295b-5p      | 3666-3672 | 7mer-1A | -0.05 | 60 | -0.04 | 0     | N/A      |
| hsa-miR-3130-5p       | 3666-3672 | 7mer-1A | -0.01 | 25 | -0.01 | 0     | N/A      |
| hsa-miR-1912          | 3666-3672 | 7mer-1A | -0.01 | 12 | -0.01 | 0     | N/A      |
| hsa-miR-3162-3p       | 3669-3675 | 7mer-m8 | -0.06 | 52 | -0.05 | 0     | N/A      |
| hsa-miR-4684-5p       | 3675-3681 | 7mer-m8 | -0.02 | 48 | -0.02 | 0     | N/A      |
| hsa-miR-3675-3p       | 3676-3682 | 7mer-m8 | -0.02 | 31 | -0.02 | 0     | N/A      |
| hsa-miR-216b-5p       | 3677-3683 | 7mer-m8 | -0.02 | 37 | -0.02 | 1.041 | <<br>0.1 |
| hsa-miR-6716-5p       | 3681-3687 | 7mer-1A | -0.01 | 20 | -0.01 | 0     | N/A      |
| hsa-miR-4717-3p       | 3685-3691 | 7mer-m8 | -0.02 | 43 | -0.02 | 0     | N/A      |
| hsa-miR-5589-3p       | 3686-3693 | 8mer    | -0.03 | 40 | -0.03 | 0     | N/A      |
| hsa-miR-1273g-3p      | 3691-3698 | 8mer    | -0.03 | 52 | -0.03 | 0     | N/A      |
| hsa-miR-6509-3p       | 3692-3698 | 7mer-m8 | -0.02 | 29 | -0.02 | 0     | N/A      |
| hsa-miR-181a-2-3<br>p | 3692-3698 | 7mer-1A | -0.01 | 29 | -0.01 | 0     | N/A      |
| hsa-miR-6845-3p       | 3696-3702 | 7mer-1A | -0.01 | 28 | -0.01 | 0     | N/A      |
| hsa-miR-6833-3p       | 3697-3703 | 7mer-m8 | -0.02 | 61 | -0.02 | 0     | N/A      |
| hsa-miR-4768-5p       | 3697-3703 | 7mer-m8 | -0.02 | 59 | -0.02 | 0     | N/A      |
| hsa-miR-6873-3p       | 3697-3703 | 7mer-1A | -0.01 | 20 | -0.01 | 0     | N/A      |
| hsa-miR-2117          | 3698-3705 | 8mer    | -0.03 | 33 | -0.03 | 0     | N/A      |
| hsa-miR-4273          | 3699-3706 | 8mer    | -0.03 | 77 | -0.03 | 0     | N/A      |

|                  |           |         |       |    |       |       |     |
|------------------|-----------|---------|-------|----|-------|-------|-----|
| hsa-miR-7156-5p  | 3699-3706 | 8mer    | -0.03 | 66 | -0.03 | 0     | N/A |
| hsa-miR-4677-5p  | 3700-3706 | 7mer-1A | -0.01 | 31 | -0.01 | 0.085 | N/A |
| hsa-miR-6739-3p  | 3700-3706 | 7mer-m8 | -0.02 | 29 | -0.02 | 0     | N/A |
| hsa-miR-4445-5p  | 3702-3708 | 7mer-m8 | -0.02 | 24 | -0.02 | 0     | N/A |
| hsa-miR-3158-5p  | 3707-3713 | 7mer-m8 | -0.02 | 43 | -0.02 | 0     | N/A |
| hsa-miR-509-5p   | 3708-3714 | 7mer-m8 | -0.03 | 66 | -0.03 | 0     | N/A |
| hsa-miR-509-3-5p | 3708-3714 | 7mer-m8 | -0.02 | 59 | -0.02 | 0     | N/A |
| hsa-miR-4418     | 3708-3714 | 7mer-m8 | -0.02 | 52 | -0.02 | 0     | N/A |
| hsa-miR-5002-3p  | 3710-3716 | 7mer-1A | -0.03 | 36 | -0.03 | 0     | N/A |
| hsa-miR-3118     | 3711-3717 | 7mer-m8 | -0.08 | 59 | -0.07 | 0.941 | N/A |
| hsa-miR-134-5p   | 3711-3717 | 7mer-m8 | -0.07 | 55 | -0.06 | 0.941 | N/A |
| hsa-miR-5190     | 3713-3720 | 8mer    | -0.03 | 71 | -0.03 | 0     | N/A |
| hsa-miR-4276     | 3714-3720 | 7mer-m8 | -0.02 | 25 | -0.02 | 0     | N/A |
| hsa-miR-5094     | 3715-3722 | 8mer    | -0.03 | 43 | -0.03 | 0     | N/A |
| hsa-miR-374a-3p  | 3717-3723 | 7mer-m8 | -0.02 | 46 | -0.02 | 0.085 | N/A |
| hsa-miR-361-5p   | 3717-3723 | 7mer-1A | -0.01 | 12 | -0.01 | 0.245 | N/A |
| hsa-miR-3155b    | 3723-3729 | 7mer-1A | -0.04 | 74 | -0.04 | 0.099 | N/A |
| hsa-miR-3155a    | 3723-3729 | 7mer-1A | -0.04 | 74 | -0.04 | 0.099 | N/A |
| hsa-miR-484      | 3723-3729 | 7mer-1A | -0.01 | 50 | -0.01 | 0.099 | N/A |
| hsa-miR-1266-5p  | 3725-3731 | 7mer-1A | -0.06 | 71 | -0.05 | 0.024 | N/A |
| hsa-miR-4518     | 3725-3731 | 7mer-1A | -0.02 | 69 | -0.02 | 0.024 | N/A |
| hsa-miR-3664-3p  | 3725-3731 | 7mer-1A | -0.02 | 44 | -0.02 | 0     | N/A |
| hsa-miR-3184-3p  | 3728-3734 | 7mer-m8 | -0.02 | 52 | -0.02 | 0     | N/A |
| hsa-miR-3691-3p  | 3730-3736 | 7mer-m8 | -0.02 | 52 | -0.02 | 0     | N/A |
| hsa-miR-4480     | 3731-3737 | 7mer-m8 | -0.02 | 39 | -0.02 | 0     | N/A |

|                   |           |               |       |     |       |       |       |
|-------------------|-----------|---------------|-------|-----|-------|-------|-------|
| hsa-miR-6807-5p   | 3734-3740 | 7mer-m8       | -0.02 | 32  | -0.02 | 0     | N/A   |
| hsa-miR-3646      | 3735-3746 | non-canonical | N/A   | N/A | N/A   | 0     | N/A   |
| hsa-miR-3646      | 3735-3746 | non-canonical | N/A   | N/A | N/A   | 0     | N/A   |
| hsa-miR-1252-3p   | 3737-3743 | 7mer-m8       | -0.02 | 64  | -0.02 | 0     | N/A   |
| hsa-miR-203a-3p.1 | 3739-3745 | 7mer-1A       | -0.01 | 33  | -0.01 | 0.058 | < 0.1 |
| hsa-miR-510-3p    | 3741-3747 | 7mer-1A       | -0.01 | 43  | -0.01 | 0     | N/A   |
| hsa-miR-3140-3p   | 3744-3750 | 7mer-m8       | -0.02 | 42  | -0.02 | 0     | N/A   |
| hsa-miR-887-3p    | 3750-3756 | 7mer-1A       | -0.09 | 61  | -0.08 | 0     | N/A   |
| hsa-miR-219a-2-3p | 3754-3760 | 7mer-1A       | -0.03 | 49  | -0.03 | 0.635 | N/A   |
| hsa-miR-219b-3p   | 3754-3760 | 7mer-1A       | -0.01 | 29  | -0.01 | 0     | N/A   |
| hsa-miR-3605-5p   | 3759-3766 | 8mer          | -0.07 | 52  | -0.06 | 0     | N/A   |
| hsa-miR-1185-5p   | 3760-3766 | 7mer-1A       | -0.08 | 58  | -0.07 | 0.024 | N/A   |
| hsa-miR-3679-5p   | 3760-3766 | 7mer-1A       | -0.02 | 15  | -0.01 | 0.024 | N/A   |
| hsa-miR-4710      | 3762-3769 | 8mer          | -0.08 | 66  | -0.07 | 0     | N/A   |
| hsa-miR-4792      | 3763-3769 | 7mer-1A       | -0.03 | 46  | -0.03 | 0     | N/A   |
| hsa-miR-7855-5p   | 3763-3769 | 7mer-m8       | -0.02 | 35  | -0.02 | 0     | N/A   |
| hsa-miR-4299      | 3764-3770 | 7mer-m8       | -0.02 | 36  | -0.02 | 0     | N/A   |
| hsa-miR-133a-5p   | 3766-3772 | 7mer-1A       | -0.2  | 87  | -0.17 | 0.085 | N/A   |
| hsa-miR-6131      | 3766-3772 | 7mer-1A       | -0.01 | 30  | -0.01 | 0.024 | N/A   |
| hsa-miR-3692-5p   | 3767-3773 | 7mer-m8       | -0.12 | 81  | -0.1  | 0     | N/A   |
| hsa-miR-203b-3p   | 3771-3777 | 7mer-m8       | -0.02 | 47  | -0.02 | 0     | N/A   |

|                  |           |         |       |    |       |       |     |
|------------------|-----------|---------|-------|----|-------|-------|-----|
| hsa-miR-4539     | 3772-3778 | 7mer-m8 | -0.02 | 46 | -0.02 | 0     | N/A |
| hsa-miR-4267     | 3777-3783 | 7mer-1A | -0.01 | 42 | -0.01 | 0     | N/A |
| hsa-miR-6512-3p  | 3778-3784 | 7mer-1A | -0.01 | 24 | -0.01 | 0     | N/A |
| hsa-miR-6720-5p  | 3778-3784 | 7mer-1A | -0.01 | 24 | -0.01 | 0     | N/A |
| hsa-miR-3180-5p  | 3779-3785 | 7mer-1A | -0.01 | 29 | -0.01 | 0     | N/A |
| hsa-miR-210-5p   | 3785-3791 | 7mer-1A | -0.04 | 38 | -0.03 | 0.085 | N/A |
| hsa-miR-4749-3p  | 3785-3791 | 7mer-1A | -0.01 | 25 | -0.01 | 0     | N/A |
| hsa-miR-503-3p   | 3792-3798 | 7mer-m8 | -0.02 | 26 | -0.02 | 0     | N/A |
| hsa-miR-6835-5p  | 3794-3801 | 8mer    | -0.08 | 38 | -0.07 | 0     | N/A |
| hsa-miR-6751-5p  | 3795-3801 | 7mer-m8 | -0.08 | 63 | -0.07 | 0     | N/A |
| hsa-miR-6803-5p  | 3795-3801 | 7mer-m8 | -0.05 | 46 | -0.04 | 0     | N/A |
| hsa-miR-6752-5p  | 3795-3801 | 7mer-1A | -0.09 | 44 | -0.08 | 0     | N/A |
| hsa-miR-6842-5p  | 3795-3801 | 7mer-1A | -0.09 | 33 | -0.07 | 0     | N/A |
| hsa-miR-7110-5p  | 3795-3801 | 7mer-1A | -0.07 | 30 | -0.06 | 0     | N/A |
| hsa-miR-4447     | 3796-3802 | 7mer-m8 | -0.09 | 70 | -0.08 | 0     | N/A |
| hsa-miR-4472     | 3796-3802 | 7mer-m8 | -0.09 | 70 | -0.08 | 0     | N/A |
| hsa-miR-92a-2-5p | 3797-3803 | 7mer-m8 | -0.07 | 65 | -0.06 | 0     | N/A |
| hsa-miR-125a-3p  | 3800-3806 | 7mer-1A | -0.06 | 66 | -0.05 | 0.024 | N/A |
| hsa-miR-764      | 3800-3806 | 7mer-1A | -0.01 | 51 | -0.01 | 0     | N/A |
| hsa-miR-3934-5p  | 3800-3806 | 7mer-1A | -0.01 | 34 | -0.01 | 0     | N/A |
| hsa-miR-3934-3p  | 3802-3808 | 7mer-m8 | -0.06 | 58 | -0.05 | 0     | N/A |
| hsa-miR-6854-5p  | 3803-3809 | 7mer-m8 | -0.02 | 40 | -0.02 | 0     | N/A |
| hsa-miR-330-3p   | 3807-3813 | 7mer-1A | -0.01 | 30 | -0.01 | 0.265 | N/A |
| hsa-miR-607      | 3809-3815 | 7mer-1A | -0.01 | 40 | -0.01 | 0     | N/A |
| hsa-miR-1305     | 3810-3816 | 7mer-1A | -0.01 | 49 | -0.01 | 0     | N/A |

|                  |           |         |       |    |       |       |     |
|------------------|-----------|---------|-------|----|-------|-------|-----|
| hsa-miR-6837-5p  | 3818-3824 | 7mer-m8 | -0.05 | 57 | -0.05 | 0     | N/A |
| hsa-miR-4685-5p  | 3818-3824 | 7mer-m8 | -0.04 | 53 | -0.03 | 0     | N/A |
| hsa-miR-1915-3p  | 3819-3826 | 8mer    | -0.03 | 64 | -0.03 | 0     | N/A |
| hsa-miR-6764-5p  | 3819-3826 | 8mer    | -0.03 | 60 | -0.03 | 0     | N/A |
| hsa-miR-4726-3p  | 3820-3826 | 7mer-1A | -0.01 | 39 | -0.01 | 0     | N/A |
| hsa-miR-6840-3p  | 3820-3826 | 7mer-1A | -0.01 | 37 | -0.01 | 0     | N/A |
| hsa-miR-2467-3p  | 3828-3835 | 8mer    | -0.03 | 44 | -0.03 | 0     | N/A |
| hsa-miR-3678-3p  | 3829-3835 | 7mer-m8 | -0.02 | 38 | -0.02 | 0     | N/A |
| hsa-miR-3123     | 3835-3842 | 8mer    | -0.03 | 71 | -0.03 | 0     | N/A |
| hsa-miR-3925-5p  | 3836-3842 | 7mer-1A | -0.01 | 54 | -0.01 | 0     | N/A |
| hsa-miR-1303     | 3837-3843 | 7mer-m8 | -0.02 | 23 | -0.02 | 0.024 | N/A |
| hsa-miR-374c-3p  | 3840-3846 | 7mer-1A | -0.01 | 34 | -0.01 | 0     | N/A |
| hsa-miR-7159-3p  | 3851-3857 | 7mer-1A | -0.01 | 36 | -0.01 | 0     | N/A |
| hsa-miR-4482-3p  | 3851-3857 | 7mer-1A | -0.01 | 29 | -0.01 | 0     | N/A |
| hsa-miR-29b-2-5p | 3854-3860 | 7mer-m8 | -0.02 | 56 | -0.02 | 0     | N/A |
| hsa-miR-29b-1-5p | 3855-3861 | 7mer-m8 | -0.02 | 43 | -0.02 | 0     | N/A |
| hsa-miR-4463     | 3858-3864 | 7mer-m8 | -0.02 | 55 | -0.02 | 0     | N/A |
| hsa-miR-873-3p   | 3859-3865 | 7mer-m8 | -0.02 | 45 | -0.02 | 0     | N/A |
| hsa-miR-6077     | 3863-3869 | 7mer-m8 | -0.02 | 50 | -0.02 | 0     | N/A |
| hsa-miR-9500     | 3865-3871 | 7mer-m8 | -0.02 | 39 | -0.02 | 0     | N/A |
| hsa-miR-6797-5p  | 3867-3873 | 7mer-m8 | -0.08 | 59 | -0.07 | 0     | N/A |
| hsa-miR-1249-5p  | 3867-3873 | 7mer-m8 | -0.08 | 59 | -0.07 | 0     | N/A |
| hsa-miR-4779     | 3868-3874 | 7mer-m8 | -0.12 | 80 | -0.1  | 0     | N/A |
| hsa-miR-6891-5p  | 3869-3875 | 7mer-m8 | -0.03 | 52 | -0.03 | 0.099 | N/A |
| hsa-miR-3173-3p  | 3869-3875 | 7mer-m8 | -0.02 | 36 | -0.02 | 0.099 | N/A |

|                  |           |         |       |    |       |       |          |
|------------------|-----------|---------|-------|----|-------|-------|----------|
| hsa-miR-4719     | 3874-3880 | 7mer-1A | -0.01 | 38 | -0.01 | 0     | N/A      |
| hsa-miR-4660     | 3883-3889 | 7mer-m8 | -0.1  | 74 | -0.08 | 0.024 | N/A      |
| hsa-miR-646      | 3884-3891 | 8mer    | -0.03 | 48 | -0.03 | 0.024 | N/A      |
| hsa-miR-6838-5p  | 3885-3891 | 7mer-1A | -0.08 | 65 | -0.07 | 0.154 | <<br>0.1 |
| hsa-miR-4524a-5p | 3885-3891 | 7mer-m8 | -0.08 | 64 | -0.07 | 0     | N/A      |
| hsa-miR-4524b-5p | 3885-3891 | 7mer-m8 | -0.07 | 60 | -0.06 | 0     | N/A      |
| hsa-miR-503-5p   | 3885-3891 | 7mer-1A | -0.05 | 60 | -0.04 | 0.154 | <<br>0.1 |
| hsa-miR-424-5p   | 3885-3891 | 7mer-1A | -0.05 | 57 | -0.04 | 0.154 | <<br>0.1 |
| hsa-miR-497-5p   | 3885-3891 | 7mer-1A | -0.05 | 57 | -0.04 | 0.154 | <<br>0.1 |
| hsa-miR-15b-5p   | 3885-3891 | 7mer-1A | -0.03 | 39 | -0.02 | 0.154 | <<br>0.1 |
| hsa-miR-16-5p    | 3885-3891 | 7mer-1A | -0.02 | 25 | -0.01 | 0.154 | <<br>0.1 |
| hsa-miR-195-5p   | 3885-3891 | 7mer-1A | -0.02 | 25 | -0.01 | 0.154 | <<br>0.1 |
| hsa-miR-15a-5p   | 3885-3891 | 7mer-1A | -0.01 | 18 | -0.01 | 0.154 | <<br>0.1 |
| hsa-miR-6505-5p  | 3890-3896 | 7mer-m8 | -0.02 | 34 | -0.02 | 0     | N/A      |
| hsa-miR-24-2-5p  | 3898-3904 | 7mer-1A | -0.03 | 15 | -0.03 | 0     | N/A      |
| hsa-miR-24-1-5p  | 3898-3904 | 7mer-1A | -0.03 | 15 | -0.03 | 0     | N/A      |
| hsa-miR-4774-3p  | 3899-3905 | 7mer-m8 | -0.02 | 20 | -0.02 | 0     | N/A      |
| hsa-miR-4423-5p  | 3900-3907 | 8mer    | -0.03 | 22 | -0.03 | 0     | N/A      |

|                       |           |         |       |    |       |       |          |
|-----------------------|-----------|---------|-------|----|-------|-------|----------|
| hsa-miR-744-3p        | 3901-3907 | 7mer-m8 | -0.02 | 33 | -0.02 | 0     | N/A      |
| hsa-miR-6501-5p       | 3901-3907 | 7mer-1A | -0.06 | 23 | -0.05 | 0     | N/A      |
| hsa-miR-3934-5p       | 3905-3911 | 7mer-m8 | -0.02 | 47 | -0.02 | 0     | N/A      |
| hsa-miR-552-3p        | 3906-3912 | 7mer-m8 | -0.02 | 33 | -0.02 | 0.024 | N/A      |
| hsa-miR-421           | 3909-3916 | 8mer    | -0.03 | 49 | -0.03 | 1.156 | N/A      |
| hsa-miR-4709-5p       | 3909-3915 | 7mer-1A | -0.01 | 33 | -0.01 | 0     | N/A      |
| hsa-miR-505-3p.2      | 3910-3916 | 7mer-1A | -0.01 | 46 | -0.01 | 1.206 | N/A      |
| hsa-miR-7159-5p       | 3910-3916 | 7mer-1A | -0.01 | 20 | -0.01 | 0     | N/A      |
| hsa-miR-1305          | 3911-3917 | 7mer-m8 | -0.02 | 78 | -0.02 | 0     | N/A      |
| hsa-miR-3616-3p       | 3919-3926 | 8mer    | -0.32 | 94 | -0.27 | 0     | N/A      |
| hsa-miR-1226-5p       | 3920-3927 | 8mer    | -0.25 | 94 | -0.21 | 0     | N/A      |
| hsa-miR-4721          | 3920-3926 | 7mer-1A | -0.18 | 81 | -0.15 | 0     | N/A      |
| hsa-miR-6834-5p       | 3921-3927 | 7mer-1A | -0.15 | 86 | -0.13 | 0     | N/A      |
| hsa-miR-6734-5p       | 3921-3927 | 7mer-1A | -0.06 | 53 | -0.05 | 0     | N/A      |
| hsa-miR-411-5p.1      | 3929-3935 | 7mer-m8 | -0.06 | 82 | -0.05 | 0.96  | N/A      |
| hsa-miR-2467-3p       | 3934-3940 | 7mer-1A | -0.12 | 76 | -0.1  | 0     | N/A      |
| hsa-miR-3678-3p       | 3934-3940 | 7mer-m8 | -0.08 | 71 | -0.07 | 0     | N/A      |
| hsa-miR-5680          | 3939-3945 | 7mer-m8 | -0.02 | 68 | -0.02 | 0     | N/A      |
| hsa-miR-513b-5p       | 3948-3954 | 7mer-m8 | -0.02 | 48 | -0.02 | 0.099 | N/A      |
| hsa-miR-125b-2-3<br>p | 3948-3954 | 7mer-1A | -0.01 | 32 | -0.01 | 0     | N/A      |
| hsa-miR-4457          | 3948-3954 | 7mer-1A | -0.01 | 31 | -0.01 | 0     | N/A      |
| hsa-miR-218-5p        | 3956-3962 | 7mer-m8 | -0.04 | 57 | -0.04 | 2.624 | 0.2<br>8 |
| hsa-miR-636           | 3956-3962 | 7mer-1A | -0.01 | 21 | -0.01 | 0.085 | N/A      |

|                       |           |               |       |     |       |       |          |
|-----------------------|-----------|---------------|-------|-----|-------|-------|----------|
| hsa-miR-6867-5p       | 3959-3965 | 7mer-m8       | -0.07 | 42  | -0.06 | 0     | N/A      |
| hsa-miR-595           | 3961-3967 | 7mer-m8       | -0.02 | 55  | -0.02 | 0.024 | N/A      |
| hsa-miR-548az-5p      | 3963-3970 | 8mer          | -0.03 | 78  | -0.03 | 0     | N/A      |
| hsa-miR-548t-5p       | 3963-3970 | 8mer          | -0.03 | 78  | -0.03 | 0     | N/A      |
| hsa-miR-548n          | 3964-3970 | 7mer-1A       | -0.01 | 41  | -0.01 | 0.024 | N/A      |
| hsa-miR-95-5p         | 3967-3973 | 7mer-m8       | -0.02 | 22  | -0.02 | 0.085 | N/A      |
| hsa-miR-106a-3p       | 3970-3976 | 7mer-1A       | -0.01 | 32  | -0.01 | 0     | N/A      |
| hsa-miR-4684-3p       | 3971-3978 | 8mer          | -0.08 | 64  | -0.07 | 0     | N/A      |
| hsa-miR-4781-3p       | 3974-3980 | 7mer-1A       | -0.01 | 32  | -0.01 | 0     | N/A      |
| hsa-miR-4528          | 3978-3984 | 7mer-1A       | -0.01 | 22  | -0.01 | 0     | N/A      |
| hsa-miR-5694          | 3981-3987 | 7mer-m8       | -0.02 | 47  | -0.02 | 0     | N/A      |
| hsa-miR-1288-5p       | 3982-3988 | 7mer-m8       | -0.02 | 30  | -0.02 | 0     | N/A      |
| hsa-miR-4468          | 3985-3992 | 8mer          | -0.1  | 71  | -0.09 | 0     | N/A      |
| hsa-miR-8066          | 3990-3996 | 7mer-m8       | -0.02 | 34  | -0.02 | 0     | N/A      |
| hsa-miR-203a-3p.<br>1 | 3992-3998 | 7mer-m8       | -0.02 | 50  | -0.02 | 0.829 | 0.2<br>3 |
| hsa-miR-5093          | 3993-3999 | 7mer-m8       | -0.02 | 40  | -0.02 | 0     | N/A      |
| hsa-miR-651-3p        | 3995-4001 | 7mer-m8       | -0.02 | 37  | -0.02 | 0     | N/A      |
| hsa-miR-6830-5p       | 3996-4002 | 7mer-m8       | -0.02 | 24  | -0.02 | 0     | N/A      |
| hsa-miR-500b-3p       | 3997-4009 | non-canonical | N/A   | N/A | N/A   | 0     | N/A      |
| hsa-miR-500b-3p       | 3997-4009 | non-canonical | N/A   | N/A | N/A   | 0     | N/A      |
| hsa-miR-6809-5p       | 3998-4004 | 7mer-m8       | -0.11 | 68  | -0.09 | 0     | N/A      |
| hsa-miR-4742-5p       | 4000-4006 | 7mer-m8       | -0.02 | 36  | -0.02 | 0.024 | N/A      |

|                 |           |         |       |    |       |       |          |
|-----------------|-----------|---------|-------|----|-------|-------|----------|
| hsa-miR-4645-5p | 4001-4007 | 7mer-m8 | -0.02 | 32 | -0.02 | 0     | N/A      |
| hsa-miR-4673    | 4001-4007 | 7mer-m8 | -0.02 | 28 | -0.02 | 0     | N/A      |
| hsa-miR-361-3p  | 4004-4010 | 7mer-m8 | -0.02 | 27 | -0.02 | 0.099 | N/A      |
| hsa-miR-3943    | 4006-4012 | 7mer-m8 | -0.1  | 75 | -0.08 | 0.024 | N/A      |
| hsa-miR-6856-3p | 4008-4015 | 8mer    | -0.03 | 48 | -0.03 | 0.085 | N/A      |
| hsa-miR-329-5p  | 4015-4021 | 7mer-m8 | -0.02 | 51 | -0.02 | 0.085 | N/A      |
| hsa-miR-3607-3p | 4021-4027 | 7mer-1A | -0.01 | 39 | -0.01 | 0     | N/A      |
| hsa-miR-3686    | 4021-4028 | 8mer    | -0.03 | 37 | -0.03 | 0     | N/A      |
| hsa-miR-26b-3p  | 4025-4032 | 8mer    | -0.03 | 47 | -0.03 | 0.085 | N/A      |
| hsa-miR-4652-3p | 4027-4034 | 8mer    | -0.03 | 75 | -0.03 | 0     | N/A      |
| hsa-miR-4743-3p | 4028-4034 | 7mer-1A | -0.01 | 39 | -0.01 | 0     | N/A      |
| hsa-miR-876-5p  | 4031-4037 | 7mer-m8 | -0.05 | 70 | -0.04 | 1.634 | N/A      |
| hsa-miR-3167    | 4031-4037 | 7mer-m8 | -0.04 | 61 | -0.03 | 1.634 | N/A      |
| hsa-miR-541-5p  | 4033-4039 | 7mer-m8 | -0.02 | 38 | -0.02 | 0.085 | N/A      |
| hsa-miR-6809-5p | 4036-4042 | 7mer-m8 | -0.09 | 64 | -0.08 | 0     | N/A      |
| hsa-miR-583     | 4041-4047 | 7mer-m8 | -0.02 | 58 | -0.02 | 0.024 | N/A      |
| hsa-miR-4299    | 4047-4053 | 7mer-m8 | -0.03 | 50 | -0.02 | 0     | N/A      |
| hsa-miR-138-5p  | 4048-4054 | 7mer-m8 | -0.08 | 58 | -0.07 | 0.433 | <<br>0.1 |
| hsa-miR-3652    | 4050-4056 | 7mer-1A | -0.15 | 86 | -0.13 | 0.437 | N/A      |
| hsa-miR-4430    | 4050-4056 | 7mer-1A | -0.12 | 81 | -0.1  | 0.437 | N/A      |
| hsa-miR-4505    | 4050-4056 | 7mer-1A | -0.12 | 71 | -0.1  | 0.437 | N/A      |
| hsa-miR-5787    | 4050-4056 | 7mer-1A | -0.06 | 68 | -0.05 | 0.437 | N/A      |
| hsa-miR-6842-3p | 4050-4056 | 7mer-m8 | -0.09 | 65 | -0.08 | 0.437 | N/A      |
| hsa-miR-4474-3p | 4052-4058 | 7mer-m8 | -0.04 | 40 | -0.03 | 0     | N/A      |

|                  |           |         |       |    |       |       |          |
|------------------|-----------|---------|-------|----|-------|-------|----------|
| hsa-miR-644a     | 4053-4059 | 7mer-m8 | -0.15 | 81 | -0.12 | 0     | N/A      |
| hsa-miR-3934-5p  | 4056-4062 | 7mer-m8 | -0.02 | 47 | -0.02 | 0     | N/A      |
| hsa-miR-3665     | 4057-4063 | 7mer-m8 | -0.11 | 66 | -0.1  | 0     | N/A      |
| hsa-miR-4736     | 4058-4065 | 8mer    | -0.06 | 68 | -0.05 | 0     | N/A      |
| hsa-miR-4763-3p  | 4059-4065 | 7mer-1A | -0.15 | 80 | -0.13 | 0     | N/A      |
| hsa-miR-1207-5p  | 4059-4065 | 7mer-1A | -0.12 | 74 | -0.1  | 0     | N/A      |
| hsa-miR-7150     | 4059-4065 | 7mer-m8 | -0.08 | 66 | -0.07 | 0     | N/A      |
| hsa-miR-183-5p.1 | 4061-4067 | 7mer-1A | -0.01 | 31 | -0.01 | 0.773 | <<br>0.1 |
| hsa-miR-4774-5p  | 4065-4071 | 7mer-m8 | -0.02 | 22 | -0.02 | 0     | N/A      |
| hsa-miR-331-3p   | 4068-4074 | 7mer-m8 | -0.02 | 40 | -0.02 | 0.433 | N/A      |
| hsa-miR-5195-5p  | 4070-4076 | 7mer-1A | -0.02 | 8  | -0.02 | 0     | N/A      |
| hsa-miR-4718     | 4074-4080 | 7mer-m8 | -0.02 | 27 | -0.02 | 0     | N/A      |
| hsa-miR-320b     | 4077-4083 | 7mer-m8 | -0.02 | 48 | -0.02 | 0.229 | N/A      |
| hsa-miR-320d     | 4077-4083 | 7mer-m8 | -0.02 | 48 | -0.02 | 0.229 | N/A      |
| hsa-miR-4429     | 4077-4083 | 7mer-m8 | -0.02 | 48 | -0.02 | 0.229 | N/A      |
| hsa-miR-320c     | 4077-4083 | 7mer-m8 | -0.02 | 48 | -0.02 | 0.229 | N/A      |
| hsa-miR-320a     | 4077-4083 | 7mer-m8 | -0.02 | 48 | -0.02 | 0.229 | N/A      |
| hsa-miR-520d-5p  | 4080-4086 | 7mer-m8 | -0.02 | 68 | -0.02 | 0.085 | N/A      |
| hsa-miR-524-5p   | 4080-4086 | 7mer-m8 | -0.02 | 67 | -0.02 | 0.085 | N/A      |
| hsa-miR-6826-5p  | 4087-4093 | 7mer-1A | -0.01 | 24 | -0.01 | 0     | N/A      |
| hsa-miR-676-5p   | 4090-4096 | 7mer-1A | -0.01 | 42 | -0.01 | 0     | N/A      |
| hsa-miR-6740-3p  | 4092-4098 | 7mer-1A | -0.09 | 68 | -0.08 | 0     | N/A      |
| hsa-miR-4711-3p  | 4093-4100 | 8mer    | -0.03 | 41 | -0.03 | 0     | N/A      |
| hsa-miR-3120-5p  | 4099-4105 | 7mer-m8 | -0.04 | 62 | -0.03 | 0     | N/A      |

|                  |           |         |       |    |       |       |          |
|------------------|-----------|---------|-------|----|-------|-------|----------|
| hsa-miR-5699-3p  | 4100-4107 | 8mer    | -0.09 | 70 | -0.07 | 0     | N/A      |
| hsa-miR-4421     | 4100-4107 | 8mer    | -0.09 | 67 | -0.07 | 0     | N/A      |
| hsa-miR-6748-3p  | 4101-4107 | 7mer-1A | -0.04 | 54 | -0.03 | 0     | N/A      |
| hsa-miR-4668-3p  | 4105-4111 | 7mer-m8 | -0.02 | 74 | -0.02 | 0     | N/A      |
| hsa-miR-548c-3p  | 4106-4113 | 8mer    | -0.03 | 93 | -0.03 | 0.024 | N/A      |
| hsa-miR-3121-3p  | 4122-4128 | 7mer-m8 | -0.02 | 48 | -0.02 | 0.024 | N/A      |
| hsa-miR-520d-5p  | 4128-4134 | 7mer-1A | -0.01 | 52 | -0.01 | 0.085 | N/A      |
| hsa-miR-524-5p   | 4128-4134 | 7mer-1A | -0.01 | 51 | -0.01 | 0.085 | N/A      |
| hsa-miR-548at-5p | 4132-4138 | 7mer-m8 | -0.02 | 46 | -0.02 | 0     | N/A      |
| hsa-miR-3065-5p  | 4136-4142 | 7mer-m8 | -0.02 | 24 | -0.02 | 0     | N/A      |
| hsa-miR-146b-5p  | 4151-4157 | 7mer-m8 | -0.08 | 71 | -0.07 | 0.029 | <<br>0.1 |
| hsa-miR-146a-5p  | 4151-4157 | 7mer-m8 | -0.08 | 71 | -0.07 | 0.029 | <<br>0.1 |
| hsa-miR-7153-5p  | 4151-4157 | 7mer-m8 | -0.05 | 56 | -0.04 | 0.029 | <<br>0.1 |
| hsa-miR-3925-5p  | 4152-4158 | 7mer-m8 | -0.06 | 85 | -0.05 | 0     | N/A      |
| hsa-miR-4311     | 4154-4161 | 8mer    | -0.03 | 78 | -0.03 | 0     | N/A      |
| hsa-miR-583      | 4155-4161 | 7mer-1A | -0.02 | 56 | -0.01 | 0.099 | N/A      |
| hsa-miR-1276     | 4155-4161 | 7mer-1A | -0.01 | 54 | -0.01 | 0.024 | N/A      |
| hsa-miR-187-5p   | 4162-4168 | 7mer-1A | -0.05 | 55 | -0.04 | 0.085 | N/A      |
| hsa-miR-548v     | 4162-4168 | 7mer-1A | -0.02 | 26 | -0.02 | 0     | N/A      |
| hsa-miR-4276     | 4167-4173 | 7mer-1A | -0.04 | 45 | -0.03 | 0     | N/A      |
| hsa-miR-5000-5p  | 4169-4175 | 7mer-m8 | -0.02 | 48 | -0.02 | 0     | N/A      |
| hsa-miR-520d-5p  | 4174-4180 | 7mer-m8 | -0.02 | 68 | -0.02 | 0.085 | N/A      |

|                  |           |               |       |     |       |       |     |
|------------------|-----------|---------------|-------|-----|-------|-------|-----|
| hsa-miR-524-5p   | 4174-4180 | 7mer-m8       | -0.02 | 67  | -0.02 | 0.085 | N/A |
| hsa-let-7c-3p    | 4176-4183 | 8mer          | -0.03 | 48  | -0.03 | 0.085 | N/A |
| hsa-let-7g-3p    | 4177-4183 | 7mer-1A       | -0.07 | 72  | -0.06 | 0.085 | N/A |
| hsa-let-7a-2-3p  | 4177-4183 | 7mer-1A       | -0.05 | 63  | -0.04 | 0.085 | N/A |
| hsa-miR-493-5p   | 4177-4183 | 7mer-1A       | -0.01 | 31  | -0.01 | 0.154 | N/A |
| hsa-miR-1277-5p  | 4183-4189 | 7mer-m8       | -0.02 | 53  | -0.02 | 0     | N/A |
| hsa-miR-548c-3p  | 4187-4193 | 7mer-1A       | -0.01 | 57  | -0.01 | 0.349 | N/A |
| hsa-miR-4799-5p  | 4190-4196 | 7mer-1A       | -0.01 | 35  | -0.01 | 0     | N/A |
| hsa-miR-4263     | 4191-4197 | 7mer-1A       | -0.02 | 57  | -0.01 | 0     | N/A |
| hsa-miR-576-5p   | 4191-4197 | 7mer-1A       | -0.01 | 37  | -0.01 | 0.085 | N/A |
| hsa-miR-1252-3p  | 4198-4204 | 7mer-m8       | -0.02 | 64  | -0.02 | 0     | N/A |
| hsa-miR-3662     | 4199-4205 | 7mer-m8       | -0.02 | 64  | -0.02 | 0     | N/A |
| hsa-miR-411-5p.1 | 4206-4212 | 7mer-1A       | -0.01 | 32  | -0.01 | 2.702 | N/A |
| hsa-miR-6499-3p  | 4212-4223 | non-canonical | N/A   | N/A | N/A   | 0     | N/A |
| hsa-miR-6499-3p  | 4212-4223 | non-canonical | N/A   | N/A | N/A   | 0     | N/A |
| hsa-miR-8068     | 4214-4221 | 8mer          | -0.03 | 42  | -0.03 | 0     | N/A |
| hsa-miR-892a     | 4219-4225 | 7mer-m8       | -0.08 | 77  | -0.07 | 0.099 | N/A |
| hsa-miR-548g-3p  | 4221-4228 | 8mer          | -0.03 | 69  | -0.03 | 0     | N/A |
| hsa-miR-548av-3p | 4222-4228 | 7mer-1A       | -0.01 | 51  | -0.01 | 0     | N/A |
| hsa-miR-548aq-5p | 4226-4233 | 8mer          | -0.03 | 79  | -0.03 | 0.099 | N/A |
| hsa-miR-559      | 4226-4233 | 8mer          | -0.03 | 67  | -0.03 | 0.099 | N/A |
| hsa-miR-548as-5p | 4226-4233 | 8mer          | -0.03 | 67  | -0.03 | 0.099 | N/A |
| hsa-miR-548ap-5p | 4226-4233 | 8mer          | -0.03 | 67  | -0.03 | 0.099 | N/A |

|                  |           |         |       |    |       |       |     |
|------------------|-----------|---------|-------|----|-------|-------|-----|
| hsa-miR-548h-5p  | 4226-4233 | 8mer    | -0.03 | 66 | -0.03 | 0.099 | N/A |
| hsa-miR-548ak    | 4226-4233 | 8mer    | -0.03 | 66 | -0.03 | 0.099 | N/A |
| hsa-miR-548j-5p  | 4226-4233 | 8mer    | -0.03 | 66 | -0.03 | 0.099 | N/A |
| hsa-miR-548au-5p | 4226-4233 | 8mer    | -0.03 | 66 | -0.03 | 0.099 | N/A |
| hsa-miR-548b-5p  | 4226-4233 | 8mer    | -0.03 | 65 | -0.03 | 0.099 | N/A |
| hsa-miR-548o-5p  | 4226-4233 | 8mer    | -0.03 | 65 | -0.03 | 0.099 | N/A |
| hsa-miR-548d-5p  | 4226-4233 | 8mer    | -0.03 | 65 | -0.03 | 0.099 | N/A |
| hsa-miR-548ay-5p | 4226-4233 | 8mer    | -0.03 | 65 | -0.03 | 0.099 | N/A |
| hsa-miR-548w     | 4226-4233 | 8mer    | -0.03 | 65 | -0.03 | 0.099 | N/A |
| hsa-miR-548ad-5p | 4226-4233 | 8mer    | -0.03 | 65 | -0.03 | 0.099 | N/A |
| hsa-miR-548am-5p | 4226-4233 | 8mer    | -0.03 | 65 | -0.03 | 0.099 | N/A |
| hsa-miR-548ae-5p | 4226-4233 | 8mer    | -0.03 | 65 | -0.03 | 0.099 | N/A |
| hsa-miR-548c-5p  | 4226-4233 | 8mer    | -0.03 | 65 | -0.03 | 0.099 | N/A |
| hsa-miR-548i     | 4226-4233 | 8mer    | -0.03 | 64 | -0.03 | 0.099 | N/A |
| hsa-miR-548a-5p  | 4226-4233 | 8mer    | -0.03 | 64 | -0.03 | 0.099 | N/A |
| hsa-miR-548y     | 4226-4233 | 8mer    | -0.03 | 64 | -0.03 | 0.099 | N/A |
| hsa-miR-548bb-5p | 4226-4233 | 8mer    | -0.03 | 64 | -0.03 | 0.099 | N/A |
| hsa-miR-548ar-5p | 4226-4233 | 8mer    | -0.03 | 63 | -0.03 | 0.099 | N/A |
| hsa-miR-548ab    | 4226-4233 | 8mer    | -0.03 | 63 | -0.03 | 0.099 | N/A |
| hsa-miR-8054     | 4227-4233 | 7mer-1A | -0.01 | 59 | -0.01 | 0.024 | N/A |
| hsa-miR-548av-5p | 4227-4233 | 7mer-1A | -0.01 | 52 | -0.01 | 0.024 | N/A |
| hsa-miR-548k     | 4227-4233 | 7mer-1A | -0.01 | 51 | -0.01 | 0.024 | N/A |
| hsa-miR-548l     | 4227-4233 | 7mer-1A | -0.01 | 43 | -0.01 | 0.024 | N/A |
| hsa-miR-4744     | 4229-4235 | 7mer-1A | -0.04 | 57 | -0.03 | 0     | N/A |
| hsa-miR-4509     | 4229-4235 | 7mer-1A | -0.01 | 32 | -0.01 | 0     | N/A |

|                 |           |         |       |    |       |       |          |
|-----------------|-----------|---------|-------|----|-------|-------|----------|
| hsa-miR-520f-5p | 4230-4237 | 8mer    | -0.03 | 47 | -0.03 | 0     | N/A      |
| hsa-miR-6873-3p | 4233-4239 | 7mer-m8 | -0.02 | 32 | -0.02 | 0     | N/A      |
| hsa-miR-7110-3p | 4233-4239 | 7mer-1A | -0.01 | 30 | -0.01 | 0     | N/A      |
| hsa-miR-6817-3p | 4233-4239 | 7mer-1A | -0.01 | 26 | -0.01 | 0     | N/A      |
| hsa-miR-6895-3p | 4234-4240 | 7mer-m8 | -0.1  | 81 | -0.09 | 0     | N/A      |
| hsa-miR-6516-5p | 4239-4245 | 7mer-m8 | -0.02 | 34 | -0.02 | 0.65  | N/A      |
| hsa-miR-92b-3p  | 4241-4247 | 7mer-1A | -0.01 | 40 | -0.01 | 1.67  | <<br>0.1 |
| hsa-miR-25-3p   | 4241-4247 | 7mer-1A | -0.01 | 40 | -0.01 | 1.67  | <<br>0.1 |
| hsa-miR-92a-3p  | 4241-4247 | 7mer-1A | -0.01 | 39 | -0.01 | 1.67  | <<br>0.1 |
| hsa-miR-32-5p   | 4241-4247 | 7mer-1A | -0.01 | 35 | -0.01 | 1.67  | <<br>0.1 |
| hsa-miR-367-3p  | 4241-4247 | 7mer-1A | -0.01 | 35 | -0.01 | 1.67  | <<br>0.1 |
| hsa-miR-363-3p  | 4241-4247 | 7mer-1A | -0.01 | 35 | -0.01 | 1.67  | <<br>0.1 |
| hsa-miR-4482-3p | 4244-4250 | 7mer-m8 | -0.02 | 51 | -0.02 | 0     | N/A      |
| hsa-miR-607     | 4256-4263 | 8mer    | -0.03 | 85 | -0.03 | 0     | N/A      |
| hsa-miR-3671    | 4256-4262 | 7mer-1A | -0.01 | 27 | -0.01 | 0     | N/A      |
| hsa-miR-4328    | 4261-4267 | 7mer-1A | -0.04 | 73 | -0.03 | 0     | N/A      |
| hsa-miR-30e-3p  | 4263-4269 | 7mer-m8 | -0.02 | 54 | -0.02 | 0.024 | N/A      |
| hsa-miR-30d-3p  | 4263-4269 | 7mer-m8 | -0.02 | 54 | -0.02 | 0.024 | N/A      |
| hsa-miR-30a-3p  | 4263-4269 | 7mer-m8 | -0.02 | 54 | -0.02 | 0.024 | N/A      |

|                       |           |               |       |     |       |       |     |
|-----------------------|-----------|---------------|-------|-----|-------|-------|-----|
| hsa-miR-205-3p        | 4264-4270 | 7mer-m8       | -0.02 | 69  | -0.02 | 0     | N/A |
| hsa-miR-6832-3p       | 4279-4285 | 7mer-m8       | -0.04 | 60  | -0.04 | 0     | N/A |
| hsa-miR-652-5p        | 4282-4288 | 7mer-1A       | -0.12 | 82  | -0.1  | 0     | N/A |
| hsa-miR-6732-3p       | 4282-4288 | 7mer-1A       | -0.01 | 23  | -0.01 | 0     | N/A |
| hsa-miR-3152-5p       | 4293-4299 | 7mer-m8       | -0.16 | 84  | -0.14 | 0     | N/A |
| hsa-miR-6836-3p       | 4293-4299 | 7mer-1A       | -0.08 | 68  | -0.07 | 0     | N/A |
| hsa-miR-6881-3p       | 4298-4305 | 8mer          | -0.03 | 49  | -0.03 | 0     | N/A |
| hsa-miR-877-3p        | 4298-4304 | 7mer-1A       | -0.01 | 28  | -0.01 | 0     | N/A |
| hsa-miR-6780a-3p      | 4299-4305 | 7mer-1A       | -0.16 | 85  | -0.14 | 0     | N/A |
| hsa-miR-7111-3p       | 4299-4305 | 7mer-1A       | -0.01 | 33  | -0.01 | 0     | N/A |
| hsa-miR-670-3p        | 4300-4306 | 7mer-1A       | -0.06 | 61  | -0.05 | 0.718 | N/A |
| hsa-miR-1238-3p       | 4300-4306 | 7mer-1A       | -0.01 | 43  | -0.01 | 0     | N/A |
| hsa-miR-3124-3p       | 4301-4307 | 7mer-m8       | -0.02 | 37  | -0.02 | 0     | N/A |
| hsa-miR-3158-3p       | 4305-4311 | 7mer-m8       | -0.05 | 54  | -0.04 | 0     | N/A |
| hsa-miR-5681a         | 4308-4314 | 7mer-m8       | -0.02 | 40  | -0.02 | 0     | N/A |
| hsa-miR-550b-2-5<br>p | 4329-4336 | 8mer          | -0.19 | 88  | -0.16 | 0     | N/A |
| hsa-miR-550a-5p       | 4329-4335 | 7mer-1A       | -0.16 | 75  | -0.14 | 0.099 | N/A |
| hsa-miR-550a-3-5<br>p | 4329-4335 | 7mer-1A       | -0.16 | 75  | -0.14 | 0.099 | N/A |
| hsa-miR-1271-3p       | 4329-4335 | 7mer-1A       | -0.1  | 57  | -0.09 | 0.099 | N/A |
| hsa-miR-544b          | 4331-4342 | non-canonical | N/A   | N/A | N/A   | 0     | N/A |
| hsa-miR-544b          | 4331-4342 | non-canonical | N/A   | N/A | N/A   | 0     | N/A |

|                       |           |         |       |    |       |       |          |
|-----------------------|-----------|---------|-------|----|-------|-------|----------|
| hsa-miR-6086          | 4334-4341 | 8mer    | -0.03 | 60 | -0.03 | 0     | N/A      |
| hsa-miR-377-5p        | 4334-4341 | 8mer    | -0.03 | 40 | -0.03 | 0     | N/A      |
| hsa-miR-655-5p        | 4335-4341 | 7mer-1A | -0.1  | 71 | -0.09 | 0     | N/A      |
| hsa-miR-6793-3p       | 4342-4348 | 7mer-1A | -0.01 | 39 | -0.01 | 0     | N/A      |
| hsa-miR-590-5p        | 4351-4357 | 7mer-1A | -0.01 | 32 | -0.01 | 2.045 | 0.1<br>2 |
| hsa-miR-5579-3p       | 4351-4357 | 7mer-m8 | -0.02 | 20 | -0.02 | 0     | N/A      |
| hsa-miR-21-5p         | 4351-4357 | 7mer-1A | -0.01 | 20 | -0.01 | 2.045 | 0.1<br>2 |
| hsa-miR-192-5p        | 4356-4362 | 7mer-m8 | -0.02 | 28 | -0.02 | 1.924 | 0.1<br>7 |
| hsa-miR-215-5p        | 4356-4362 | 7mer-m8 | -0.02 | 22 | -0.02 | 1.924 | 0.1<br>7 |
| hsa-miR-197-3p        | 4369-4375 | 7mer-1A | -0.01 | 30 | -0.01 | 0.099 | N/A      |
| hsa-miR-412-3p        | 4370-4377 | 8mer    | -0.07 | 68 | -0.06 | 0.099 | N/A      |
| hsa-miR-6754-3p       | 4370-4377 | 8mer    | -0.05 | 65 | -0.04 | 0.099 | N/A      |
| hsa-miR-6837-3p       | 4371-4377 | 7mer-1A | -0.01 | 25 | -0.01 | 0     | N/A      |
| hsa-miR-4778-3p       | 4373-4380 | 8mer    | -0.03 | 59 | -0.03 | 0     | N/A      |
| hsa-miR-1236-3p       | 4376-4382 | 7mer-1A | -0.1  | 77 | -0.08 | 0.024 | N/A      |
| hsa-miR-6515-3p       | 4376-4382 | 7mer-1A | -0.07 | 68 | -0.06 | 0     | N/A      |
| hsa-miR-6809-3p       | 4377-4383 | 7mer-m8 | -0.02 | 49 | -0.02 | 0     | N/A      |
| hsa-miR-4753-3p       | 4377-4383 | 7mer-1A | -0.01 | 28 | -0.01 | 0     | N/A      |
| hsa-miR-942-5p        | 4378-4384 | 7mer-m8 | -0.02 | 38 | -0.02 | 0.024 | N/A      |
| hsa-miR-103a-2-5<br>p | 4380-4386 | 7mer-1A | -0.04 | 52 | -0.03 | 0.085 | N/A      |

|                  |           |         |       |    |       |       |     |
|------------------|-----------|---------|-------|----|-------|-------|-----|
| hsa-miR-548ad-3p | 4387-4393 | 7mer-m8 | -0.02 | 29 | -0.02 | 0     | N/A |
| hsa-miR-548ac    | 4389-4395 | 7mer-1A | -0.01 | 57 | -0.01 | 0     | N/A |
| hsa-miR-548z     | 4389-4395 | 7mer-1A | -0.01 | 57 | -0.01 | 0     | N/A |
| hsa-miR-548bb-3p | 4389-4395 | 7mer-1A | -0.01 | 57 | -0.01 | 0     | N/A |
| hsa-miR-548d-3p  | 4389-4395 | 7mer-1A | -0.01 | 57 | -0.01 | 0     | N/A |
| hsa-miR-548h-3p  | 4389-4395 | 7mer-1A | -0.01 | 57 | -0.01 | 0     | N/A |
| hsa-miR-548ah-3p | 4389-4395 | 7mer-1A | -0.01 | 50 | -0.01 | 0     | N/A |
| hsa-miR-548am-3p | 4389-4395 | 7mer-1A | -0.01 | 50 | -0.01 | 0     | N/A |
| hsa-miR-548ae-3p | 4389-4395 | 7mer-1A | -0.01 | 50 | -0.01 | 0     | N/A |
| hsa-miR-548aq-3p | 4389-4395 | 7mer-1A | -0.01 | 50 | -0.01 | 0     | N/A |
| hsa-miR-548j-3p  | 4389-4395 | 7mer-1A | -0.01 | 50 | -0.01 | 0     | N/A |
| hsa-miR-548aj-3p | 4389-4395 | 7mer-1A | -0.01 | 49 | -0.01 | 0     | N/A |
| hsa-miR-548x-3p  | 4389-4395 | 7mer-1A | -0.01 | 49 | -0.01 | 0     | N/A |
| hsa-miR-3163     | 4391-4397 | 7mer-1A | -0.01 | 45 | -0.01 | 0     | N/A |
| hsa-miR-5009-3p  | 4397-4404 | 8mer    | -0.03 | 61 | -0.03 | 0     | N/A |
| hsa-miR-3685     | 4400-4406 | 7mer-1A | -0.01 | 39 | -0.01 | 0     | N/A |
| hsa-miR-384      | 4400-4406 | 7mer-1A | -0.01 | 32 | -0.01 | 0.069 | N/A |
| hsa-miR-513c-3p  | 4403-4409 | 7mer-m8 | -0.02 | 78 | -0.02 | 0     | N/A |
| hsa-miR-3606-3p  | 4403-4409 | 7mer-m8 | -0.02 | 78 | -0.02 | 0     | N/A |
| hsa-miR-513a-3p  | 4403-4409 | 7mer-m8 | -0.02 | 78 | -0.02 | 0     | N/A |
| hsa-miR-4282     | 4404-4411 | 8mer    | -0.03 | 87 | -0.03 | 0     | N/A |
| hsa-miR-6884-3p  | 4417-4423 | 7mer-1A | -0.04 | 66 | -0.04 | 0     | N/A |
| hsa-miR-587      | 4419-4425 | 7mer-1A | -0.01 | 25 | -0.01 | 0.024 | N/A |
| hsa-miR-3160-5p  | 4422-4428 | 7mer-1A | -0.01 | 25 | -0.01 | 0     | N/A |
| hsa-miR-218-5p   | 4424-4430 | 7mer-m8 | -0.05 | 61 | -0.04 | 1.029 | <   |

|                  |           |         |       |    |       |       |          |
|------------------|-----------|---------|-------|----|-------|-------|----------|
|                  |           |         |       |    |       |       | 0.1      |
| hsa-miR-636      | 4424-4430 | 7mer-1A | -0.04 | 49 | -0.04 | 0     | N/A      |
| hsa-miR-6747-3p  | 4445-4451 | 7mer-m8 | -0.02 | 31 | -0.02 | 0     | N/A      |
| hsa-miR-6793-3p  | 4456-4462 | 7mer-m8 | -0.04 | 69 | -0.03 | 0     | N/A      |
| hsa-miR-5699-5p  | 4457-4464 | 8mer    | -0.03 | 28 | -0.03 | 0     | N/A      |
| hsa-miR-3189-5p  | 4458-4464 | 7mer-1A | -0.04 | 46 | -0.03 | 0     | N/A      |
| hsa-miR-4758-3p  | 4458-4464 | 7mer-1A | -0.01 | 24 | -0.01 | 0     | N/A      |
| hsa-miR-1913     | 4459-4465 | 7mer-m8 | -0.14 | 82 | -0.12 | 0.024 | N/A      |
| hsa-miR-324-3p   | 4459-4465 | 7mer-m8 | -0.13 | 80 | -0.11 | 0.024 | N/A      |
| hsa-miR-6890-3p  | 4461-4467 | 7mer-m8 | -0.02 | 64 | -0.02 | 0     | N/A      |
| hsa-miR-200a-3p  | 4463-4470 | 8mer    | -0.03 | 58 | -0.03 | 0.369 | <<br>0.1 |
| hsa-miR-141-3p   | 4463-4470 | 8mer    | -0.03 | 57 | -0.03 | 0.369 | <<br>0.1 |
| hsa-miR-885-5p   | 4469-4475 | 7mer-1A | -0.01 | 35 | -0.01 | 0     | N/A      |
| hsa-miR-587      | 4471-4477 | 7mer-1A | -0.01 | 25 | -0.01 | 0.024 | N/A      |
| hsa-miR-129-2-3p | 4476-4482 | 7mer-m8 | -0.04 | 56 | -0.04 | 0.208 | <<br>0.1 |
| hsa-miR-129-1-3p | 4476-4482 | 7mer-m8 | -0.04 | 56 | -0.04 | 0.208 | <<br>0.1 |
| hsa-miR-1233-3p  | 4477-4484 | 8mer    | -0.12 | 78 | -0.1  | 0.099 | N/A      |
| hsa-miR-1225-3p  | 4478-4484 | 7mer-1A | -0.05 | 52 | -0.04 | 0.024 | N/A      |
| hsa-miR-4709-5p  | 4484-4490 | 7mer-m8 | -0.02 | 45 | -0.02 | 0     | N/A      |
| hsa-miR-1244     | 4493-4499 | 7mer-1A | -0.02 | 19 | -0.01 | 0.024 | N/A      |
| hsa-miR-325      | 4494-4501 | 8mer    | -0.18 | 84 | -0.16 | 0.437 | N/A      |

|                  |           |         |       |    |       |       |          |
|------------------|-----------|---------|-------|----|-------|-------|----------|
| hsa-miR-628-3p   | 4495-4501 | 7mer-1A | -0.07 | 47 | -0.06 | 0.024 | N/A      |
| hsa-miR-1290     | 4502-4509 | 8mer    | -0.03 | 49 | -0.03 | 0.024 | N/A      |
| hsa-miR-876-5p   | 4503-4509 | 7mer-1A | -0.01 | 30 | -0.01 | 0.461 | N/A      |
| hsa-miR-3167     | 4503-4509 | 7mer-1A | -0.01 | 29 | -0.01 | 0.461 | N/A      |
| hsa-miR-6839-5p  | 4504-4510 | 7mer-m8 | -0.04 | 59 | -0.04 | 0.099 | N/A      |
| hsa-miR-378j     | 4504-4510 | 7mer-m8 | -0.02 | 40 | -0.02 | 0.099 | N/A      |
| hsa-miR-1243     | 4505-4511 | 7mer-m8 | -0.1  | 78 | -0.09 | 0     | N/A      |
| hsa-miR-891b     | 4509-4515 | 7mer-1A | -0.01 | 14 | -0.01 | 0.085 | N/A      |
| hsa-miR-3622b-5p | 4514-4520 | 7mer-1A | -0.01 | 24 | -0.01 | 0     | N/A      |
| hsa-miR-183-5p.1 | 4516-4522 | 7mer-1A | -0.01 | 31 | -0.01 | 0.38  | <<br>0.1 |
| hsa-miR-4693-3p  | 4522-4528 | 7mer-1A | -0.08 | 55 | -0.07 | 0     | N/A      |
| hsa-miR-4712-3p  | 4523-4529 | 7mer-m8 | -0.04 | 55 | -0.03 | 0     | N/A      |
| hsa-miR-1272     | 4526-4532 | 7mer-m8 | -0.02 | 39 | -0.02 | 0.024 | N/A      |
| hsa-miR-1245b-3p | 4529-4535 | 7mer-m8 | -0.02 | 30 | -0.02 | 0     | N/A      |
| hsa-miR-6868-5p  | 4533-4539 | 7mer-m8 | -0.15 | 81 | -0.12 | 0     | N/A      |
| hsa-miR-6757-3p  | 4536-4543 | 8mer    | -0.03 | 54 | -0.03 | 0     | N/A      |
| hsa-miR-6823-5p  | 4543-4549 | 7mer-m8 | -0.09 | 74 | -0.07 | 0     | N/A      |
| hsa-let-7g-3p    | 4547-4553 | 7mer-m8 | -0.02 | 46 | -0.02 | 0     | N/A      |
| hsa-let-7a-2-3p  | 4547-4553 | 7mer-m8 | -0.02 | 45 | -0.02 | 0     | N/A      |
| hsa-miR-4666a-5p | 4551-4558 | 8mer    | -0.03 | 49 | -0.03 | 0     | N/A      |
| hsa-miR-600      | 4554-4560 | 7mer-1A | -0.05 | 56 | -0.04 | 0.024 | N/A      |
| hsa-miR-627-3p   | 4558-4564 | 7mer-m8 | -0.02 | 38 | -0.02 | 0     | N/A      |
| hsa-miR-3140-3p  | 4560-4566 | 7mer-1A | -0.01 | 29 | -0.01 | 0     | N/A      |
| hsa-miR-31-3p    | 4571-4577 | 7mer-1A | -0.05 | 60 | -0.05 | 0     | N/A      |

|                 |           |         |       |    |       |       |          |
|-----------------|-----------|---------|-------|----|-------|-------|----------|
| hsa-miR-520g-3p | 4576-4582 | 7mer-m8 | -0.02 | 44 | -0.02 | 0.024 | N/A      |
| hsa-miR-520h    | 4576-4582 | 7mer-m8 | -0.02 | 44 | -0.02 | 0.024 | N/A      |
| hsa-miR-3065-5p | 4579-4585 | 7mer-m8 | -0.02 | 24 | -0.02 | 0.442 | N/A      |
| hsa-miR-497-3p  | 4584-4590 | 7mer-1A | -0.01 | 55 | -0.01 | 0.489 | N/A      |
| hsa-miR-410-3p  | 4588-4594 | 7mer-1A | -0.01 | 55 | -0.01 | 2.098 | N/A      |
| hsa-miR-5011-5p | 4589-4596 | 8mer    | -0.03 | 56 | -0.03 | 0     | N/A      |
| hsa-miR-190a-3p | 4590-4596 | 7mer-m8 | -0.02 | 40 | -0.02 | 0.085 | N/A      |
| hsa-miR-5011-5p | 4591-4598 | 8mer    | -0.03 | 56 | -0.03 | 0     | N/A      |
| hsa-miR-190a-3p | 4592-4599 | 8mer    | -0.03 | 69 | -0.03 | 0     | N/A      |
| hsa-miR-4528    | 4595-4601 | 7mer-m8 | -0.02 | 35 | -0.02 | 0     | N/A      |
| hsa-miR-130a-5p | 4598-4604 | 7mer-m8 | -0.02 | 41 | -0.02 | 0.338 | <<br>0.1 |
| hsa-miR-23b-3p  | 4598-4604 | 7mer-m8 | -0.02 | 39 | -0.02 | 0.338 | <<br>0.1 |
| hsa-miR-23a-3p  | 4598-4604 | 7mer-m8 | -0.02 | 38 | -0.02 | 0.338 | <<br>0.1 |
| hsa-miR-23c     | 4598-4604 | 7mer-m8 | -0.02 | 37 | -0.02 | 0.338 | <<br>0.1 |
| hsa-miR-224-5p  | 4601-4607 | 7mer-m8 | -0.06 | 79 | -0.05 | 0.51  | N/A      |
| hsa-miR-3616-5p | 4604-4610 | 7mer-1A | -0.07 | 70 | -0.06 | 0     | N/A      |
| hsa-miR-573     | 4604-4610 | 7mer-1A | -0.05 | 67 | -0.05 | 0     | N/A      |
| hsa-miR-33a-5p  | 4608-4615 | 8mer    | -0.03 | 70 | -0.03 | 0.178 | <<br>0.1 |
| hsa-miR-33b-5p  | 4608-4615 | 8mer    | -0.03 | 70 | -0.03 | 0.178 | <<br>0.1 |

|                 |           |         |       |    |       |       |       |
|-----------------|-----------|---------|-------|----|-------|-------|-------|
| hsa-miR-3680-3p | 4610-4616 | 7mer-m8 | -0.02 | 51 | -0.02 | 0     | N/A   |
| hsa-miR-4282    | 4614-4621 | 8mer    | -0.03 | 87 | -0.03 | 0     | N/A   |
| hsa-miR-3163    | 4616-4622 | 7mer-m8 | -0.02 | 65 | -0.02 | 0     | N/A   |
| hsa-miR-548c-3p | 4621-4627 | 7mer-1A | -0.01 | 57 | -0.01 | 0.024 | N/A   |
| hsa-miR-3163    | 4623-4629 | 7mer-1A | -0.01 | 45 | -0.01 | 0     | N/A   |
| hsa-miR-448     | 4640-4646 | 7mer-m8 | -0.02 | 36 | -0.02 | 1.03  | N/A   |
| hsa-miR-5700    | 4642-4648 | 7mer-m8 | -0.04 | 70 | -0.04 | 0     | N/A   |
| hsa-miR-4490    | 4648-4654 | 7mer-m8 | -0.09 | 61 | -0.08 | 0     | N/A   |
| hsa-miR-8078    | 4661-4667 | 7mer-1A | -0.08 | 62 | -0.07 | 0     | N/A   |
| hsa-miR-3925-3p | 4671-4677 | 7mer-1A | -0.01 | 41 | -0.01 | 0     | N/A   |
| hsa-miR-766-3p  | 4671-4677 | 7mer-1A | -0.01 | 31 | -0.01 | 0.024 | N/A   |
| hsa-miR-126-5p  | 4681-4687 | 7mer-m8 | -0.02 | 51 | -0.02 | 0     | N/A   |
| hsa-miR-648     | 4693-4699 | 7mer-m8 | -0.14 | 84 | -0.12 | 0.085 | N/A   |
| hsa-miR-595     | 4694-4700 | 7mer-m8 | -0.02 | 55 | -0.02 | 0.099 | N/A   |
| hsa-miR-520h    | 4696-4702 | 7mer-m8 | -0.02 | 44 | -0.02 | 0.099 | N/A   |
| hsa-miR-520g-3p | 4696-4702 | 7mer-m8 | -0.02 | 44 | -0.02 | 0.099 | N/A   |
| hsa-miR-7158-3p | 4705-4711 | 7mer-m8 | -0.02 | 39 | -0.02 | 0     | N/A   |
| hsa-miR-7855-5p | 4709-4715 | 7mer-1A | -0.02 | 39 | -0.02 | 0     | N/A   |
| hsa-miR-8087    | 4717-4723 | 7mer-1A | -0.01 | 45 | -0.01 | 0     | N/A   |
| hsa-miR-4432    | 4717-4723 | 7mer-1A | -0.01 | 40 | -0.01 | 0     | N/A   |
| hsa-miR-499a-5p | 4717-4723 | 7mer-m8 | -0.02 | 30 | -0.02 | 0.914 | < 0.1 |
| hsa-miR-6773-5p | 4732-4738 | 7mer-m8 | -0.1  | 70 | -0.09 | 0     | N/A   |
| hsa-miR-6724-5p | 4732-4738 | 7mer-m8 | -0.06 | 58 | -0.05 | 0     | N/A   |
| hsa-miR-296-5p  | 4732-4738 | 7mer-1A | -0.04 | 34 | -0.03 | 0.245 | N/A   |

|                  |           |         |       |    |       |       |     |
|------------------|-----------|---------|-------|----|-------|-------|-----|
| hsa-miR-5787     | 4735-4742 | 8mer    | -0.03 | 53 | -0.03 | 0     | N/A |
| hsa-miR-4505     | 4735-4742 | 8mer    | -0.03 | 35 | -0.03 | 0     | N/A |
| hsa-miR-6842-3p  | 4736-4742 | 7mer-m8 | -0.02 | 29 | -0.02 | 0     | N/A |
| hsa-miR-3652     | 4736-4742 | 7mer-1A | -0.01 | 17 | -0.01 | 0     | N/A |
| hsa-miR-4430     | 4736-4742 | 7mer-1A | -0.01 | 15 | -0.01 | 0     | N/A |
| hsa-miR-1251-5p  | 4745-4751 | 7mer-1A | -0.01 | 30 | -0.01 | 0.959 | N/A |
| hsa-miR-517-5p   | 4745-4751 | 7mer-1A | -0.02 | 29 | -0.02 | 0.024 | N/A |
| hsa-miR-4684-5p  | 4746-4752 | 7mer-1A | -0.01 | 33 | -0.01 | 0     | N/A |
| hsa-miR-942-5p   | 4747-4753 | 7mer-m8 | -0.02 | 38 | -0.02 | 0.024 | N/A |
| hsa-miR-4427     | 4755-4761 | 7mer-m8 | -0.02 | 34 | -0.02 | 0     | N/A |
| hsa-miR-4656     | 4758-4764 | 7mer-m8 | -0.04 | 35 | -0.04 | 0     | N/A |
| hsa-miR-4446-3p  | 4759-4765 | 7mer-m8 | -0.03 | 43 | -0.03 | 0.099 | N/A |
| hsa-miR-4685-5p  | 4761-4767 | 7mer-m8 | -0.02 | 40 | -0.02 | 0     | N/A |
| hsa-miR-6837-5p  | 4761-4767 | 7mer-m8 | -0.02 | 36 | -0.02 | 0     | N/A |
| hsa-miR-7156-3p  | 4766-4772 | 7mer-m8 | -0.06 | 63 | -0.05 | 0     | N/A |
| hsa-miR-1184     | 4767-4773 | 7mer-m8 | -0.02 | 56 | -0.02 | 0.099 | N/A |
| hsa-miR-4418     | 4768-4774 | 7mer-m8 | -0.02 | 52 | -0.02 | 0     | N/A |
| hsa-miR-509-5p   | 4768-4774 | 7mer-m8 | -0.02 | 51 | -0.02 | 0     | N/A |
| hsa-miR-509-3-5p | 4768-4774 | 7mer-m8 | -0.02 | 51 | -0.02 | 0     | N/A |
| hsa-miR-6890-3p  | 4770-4776 | 7mer-1A | -0.01 | 43 | -0.01 | 0     | N/A |
| hsa-miR-668-3p   | 4772-4778 | 7mer-1A | -0.01 | 28 | -0.01 | 0.752 | N/A |
| hsa-miR-219b-5p  | 4775-4781 | 7mer-1A | -0.02 | 24 | -0.01 | 0     | N/A |
| hsa-miR-125a-3p  | 4779-4786 | 8mer    | -0.03 | 44 | -0.03 | 0.099 | N/A |
| hsa-miR-3934-5p  | 4780-4786 | 7mer-1A | -0.04 | 70 | -0.04 | 0     | N/A |
| hsa-miR-764      | 4780-4786 | 7mer-1A | -0.01 | 51 | -0.01 | 0     | N/A |

|                 |           |               |       |     |       |       |     |
|-----------------|-----------|---------------|-------|-----|-------|-------|-----|
| hsa-miR-4268    | 4785-4791 | 7mer-m8       | -0.08 | 77  | -0.07 | 0     | N/A |
| hsa-miR-548e-5p | 4790-4796 | 7mer-1A       | -0.01 | 31  | -0.01 | 0     | N/A |
| hsa-miR-208a-5p | 4796-4802 | 7mer-m8       | -0.02 | 57  | -0.02 | 0.085 | N/A |
| hsa-miR-208b-5p | 4796-4802 | 7mer-m8       | -0.02 | 42  | -0.02 | 0.085 | N/A |
| hsa-miR-498     | 4800-4806 | 7mer-m8       | -0.02 | 69  | -0.02 | 0.024 | N/A |
| hsa-miR-27a-5p  | 4805-4811 | 7mer-1A       | -0.15 | 73  | -0.12 | 0.085 | N/A |
| hsa-miR-378g    | 4806-4812 | 7mer-m8       | -0.02 | 39  | -0.02 | 0     | N/A |
| hsa-miR-7854-3p | 4816-4822 | 7mer-1A       | -0.05 | 47  | -0.04 | 0     | N/A |
| hsa-miR-6134    | 4816-4822 | 7mer-1A       | -0.01 | 18  | -0.01 | 0.024 | N/A |
| hsa-miR-7162-3p | 4817-4824 | 8mer          | -0.03 | 67  | -0.03 | 0     | N/A |
| hsa-miR-4649-3p | 4818-4824 | 7mer-1A       | -0.01 | 41  | -0.01 | 0     | N/A |
| hsa-miR-423-3p  | 4818-4829 | non-canonical | N/A   | N/A | N/A   | 0     | N/A |
| hsa-miR-423-3p  | 4818-4829 | non-canonical | N/A   | N/A | N/A   | 0     | N/A |
| hsa-miR-3610    | 4825-4831 | 7mer-1A       | -0.16 | 68  | -0.14 | 0     | N/A |
| hsa-miR-6854-3p | 4831-4837 | 7mer-1A       | -0.11 | 52  | -0.09 | 0     | N/A |
| hsa-miR-4756-3p | 4839-4845 | 7mer-m8       | -0.02 | 52  | -0.02 | 0     | N/A |
| hsa-miR-4323    | 4844-4850 | 7mer-m8       | -0.02 | 17  | -0.02 | 0     | N/A |
| hsa-miR-5685    | 4846-4852 | 7mer-1A       | -0.04 | 51  | -0.03 | 0     | N/A |
| hsa-miR-4690-3p | 4846-4852 | 7mer-1A       | -0.01 | 29  | -0.01 | 0     | N/A |
| hsa-miR-3157-5p | 4847-4853 | 7mer-1A       | -0.03 | 35  | -0.02 | 0     | N/A |
| hsa-miR-6839-3p | 4852-4859 | 8mer          | -0.03 | 43  | -0.03 | 0     | N/A |
| hsa-miR-629-5p  | 4852-4858 | 7mer-1A       | -0.01 | 19  | -0.01 | 0     | N/A |
| hsa-miR-3940-5p | 4853-4859 | 7mer-1A       | -0.01 | 42  | -0.01 | 0     | N/A |

|                  |           |         |       |    |       |       |       |
|------------------|-----------|---------|-------|----|-------|-------|-------|
| hsa-miR-4507     | 4853-4859 | 7mer-1A | -0.01 | 31 | -0.01 | 0     | N/A   |
| hsa-miR-548aq-3p | 4868-4875 | 8mer    | -0.03 | 84 | -0.03 | 0     | N/A   |
| hsa-miR-548ah-3p | 4868-4875 | 8mer    | -0.03 | 84 | -0.03 | 0     | N/A   |
| hsa-miR-548ae-3p | 4868-4875 | 8mer    | -0.03 | 84 | -0.03 | 0     | N/A   |
| hsa-miR-548x-3p  | 4868-4875 | 8mer    | -0.03 | 84 | -0.03 | 0     | N/A   |
| hsa-miR-548aj-3p | 4868-4875 | 8mer    | -0.03 | 84 | -0.03 | 0     | N/A   |
| hsa-miR-548am-3p | 4868-4875 | 8mer    | -0.03 | 84 | -0.03 | 0     | N/A   |
| hsa-miR-548j-3p  | 4868-4875 | 8mer    | -0.03 | 84 | -0.03 | 0     | N/A   |
| hsa-miR-548d-3p  | 4869-4875 | 7mer-1A | -0.01 | 57 | -0.01 | 0     | N/A   |
| hsa-miR-548h-3p  | 4869-4875 | 7mer-1A | -0.01 | 57 | -0.01 | 0     | N/A   |
| hsa-miR-548ac    | 4869-4875 | 7mer-1A | -0.01 | 57 | -0.01 | 0     | N/A   |
| hsa-miR-548bb-3p | 4869-4875 | 7mer-1A | -0.01 | 57 | -0.01 | 0     | N/A   |
| hsa-miR-548z     | 4869-4875 | 7mer-1A | -0.01 | 57 | -0.01 | 0     | N/A   |
| hsa-miR-28-5p    | 4877-4883 | 7mer-m8 | -0.08 | 72 | -0.07 | 1.354 | N/A   |
| hsa-miR-708-5p   | 4877-4883 | 7mer-m8 | -0.08 | 72 | -0.07 | 1.354 | N/A   |
| hsa-miR-3139     | 4877-4883 | 7mer-m8 | -0.06 | 62 | -0.05 | 1.354 | N/A   |
| hsa-miR-4768-3p  | 4879-4885 | 7mer-1A | -0.05 | 65 | -0.04 | 0.085 | N/A   |
| hsa-miR-4459     | 4879-4885 | 7mer-1A | -0.04 | 64 | -0.03 | 0     | N/A   |
| hsa-miR-4433a-3p | 4879-4885 | 7mer-1A | -0.01 | 39 | -0.01 | 0.024 | N/A   |
| hsa-miR-3664-3p  | 4880-4886 | 7mer-m8 | -0.02 | 33 | -0.02 | 0     | N/A   |
| hsa-miR-6821-3p  | 4884-4890 | 7mer-1A | -0.05 | 53 | -0.04 | 0     | N/A   |
| hsa-miR-6790-3p  | 4884-4890 | 7mer-1A | -0.04 | 45 | -0.03 | 0     | N/A   |
| hsa-miR-613      | 4889-4895 | 7mer-1A | -0.07 | 67 | -0.06 | 0.984 | < 0.1 |
| hsa-miR-206      | 4889-4895 | 7mer-1A | -0.03 | 52 | -0.03 | 0.984 | <     |

|                 |           |         |       |    |       |       |          |
|-----------------|-----------|---------|-------|----|-------|-------|----------|
|                 |           |         |       |    |       |       | 0.1      |
| hsa-miR-1-3p    | 4889-4895 | 7mer-1A | -0.03 | 52 | -0.03 | 0.984 | <<br>0.1 |
| hsa-miR-6505-5p | 4890-4896 | 7mer-1A | -0.01 | 23 | -0.01 | 0     | N/A      |
| hsa-miR-513c-5p | 4910-4916 | 7mer-1A | -0.01 | 45 | -0.01 | 0.085 | N/A      |
| hsa-miR-514b-5p | 4910-4916 | 7mer-1A | -0.01 | 43 | -0.01 | 0.085 | N/A      |
| hsa-miR-3168    | 4913-4919 | 7mer-1A | -0.01 | 37 | -0.01 | 0     | N/A      |
| hsa-miR-6874-3p | 4913-4919 | 7mer-1A | -0.01 | 36 | -0.01 | 0     | N/A      |
| hsa-miR-148b-5p | 4913-4919 | 7mer-1A | -0.01 | 33 | -0.01 | 0     | N/A      |
| hsa-miR-5584-3p | 4913-4919 | 7mer-1A | -0.01 | 32 | -0.01 | 0     | N/A      |
| hsa-miR-1244    | 4915-4921 | 7mer-m8 | -0.02 | 22 | -0.02 | 0     | N/A      |
| hsa-miR-3129-5p | 4916-4922 | 7mer-m8 | -0.02 | 47 | -0.02 | 0     | <<br>0.1 |
| hsa-miR-199b-3p | 4916-4922 | 7mer-m8 | -0.02 | 30 | -0.02 | 0     | <<br>0.1 |
| hsa-miR-199a-3p | 4916-4922 | 7mer-m8 | -0.02 | 30 | -0.02 | 0     | <<br>0.1 |
| hsa-miR-4717-5p | 4921-4927 | 7mer-1A | -0.01 | 39 | -0.01 | 0     | N/A      |
| hsa-miR-15a-3p  | 4921-4927 | 7mer-1A | -0.01 | 28 | -0.01 | 0     | N/A      |
| hsa-miR-5704    | 4921-4927 | 7mer-m8 | -0.02 | 2  | -0.02 | 0     | N/A      |
| hsa-miR-4474-3p | 4934-4941 | 8mer    | -0.08 | 65 | -0.07 | 0     | N/A      |
| hsa-miR-7108-5p | 4935-4941 | 7mer-1A | -0.01 | 41 | -0.01 | 0     | N/A      |
| hsa-miR-4716-5p | 4944-4950 | 7mer-1A | -0.01 | 24 | -0.01 | 0     | N/A      |
| hsa-miR-3691-3p | 4949-4956 | 8mer    | -0.03 | 60 | -0.03 | 0     | N/A      |
| hsa-miR-5695    | 4951-4957 | 7mer-m8 | -0.02 | 38 | -0.02 | 0     | N/A      |

|                  |           |         |       |    |       |       |     |
|------------------|-----------|---------|-------|----|-------|-------|-----|
| hsa-miR-6836-3p  | 4954-4961 | 8mer    | -0.18 | 87 | -0.15 | 0     | N/A |
| hsa-miR-6791-3p  | 4954-4960 | 7mer-1A | -0.04 | 60 | -0.04 | 0     | N/A |
| hsa-miR-6829-3p  | 4954-4960 | 7mer-1A | -0.03 | 52 | -0.03 | 0     | N/A |
| hsa-miR-6778-3p  | 4954-4960 | 7mer-1A | -0.01 | 24 | -0.01 | 0     | N/A |
| hsa-miR-3152-5p  | 4955-4962 | 8mer    | -0.1  | 72 | -0.09 | 0     | N/A |
| hsa-miR-4774-3p  | 4956-4962 | 7mer-1A | -0.01 | 13 | -0.01 | 0     | N/A |
| hsa-miR-298      | 4963-4969 | 7mer-1A | -0.01 | 24 | -0.01 | 0.099 | N/A |
| hsa-miR-3158-5p  | 4964-4970 | 7mer-m8 | -0.02 | 43 | -0.02 | 0.364 | N/A |
| hsa-miR-580-3p   | 4980-4986 | 7mer-m8 | -0.02 | 51 | -0.02 | 0.024 | N/A |
| hsa-miR-4251     | 4981-4987 | 7mer-m8 | -0.02 | 36 | -0.02 | 0     | N/A |
| hsa-miR-4324     | 4982-4988 | 7mer-m8 | -0.02 | 35 | -0.02 | 0     | N/A |
| hsa-miR-1245b-5p | 4986-4992 | 7mer-1A | -0.06 | 69 | -0.05 | 0     | N/A |
| hsa-miR-3142     | 4986-4992 | 7mer-1A | -0.04 | 52 | -0.03 | 0     | N/A |
| hsa-miR-645      | 4988-4994 | 7mer-1A | -0.04 | 40 | -0.04 | 0.024 | N/A |
| hsa-miR-1251-5p  | 4990-4996 | 7mer-1A | -0.01 | 30 | -0.01 | 0.61  | N/A |
| hsa-miR-517-5p   | 4990-4996 | 7mer-1A | -0.01 | 15 | -0.01 | 0.099 | N/A |
| hsa-miR-200c-5p  | 4999-5005 | 7mer-1A | -0.01 | 24 | -0.01 | 0     | N/A |
| hsa-miR-550a-3p  | 4999-5005 | 7mer-1A | -0.01 | 22 | -0.01 | 0     | N/A |
| hsa-miR-4711-3p  | 5000-5007 | 8mer    | -0.03 | 41 | -0.03 | 0     | N/A |
| hsa-miR-592      | 5002-5008 | 7mer-1A | -0.08 | 65 | -0.07 | 0.099 | N/A |
| hsa-miR-5010-3p  | 5003-5009 | 7mer-m8 | -0.02 | 49 | -0.02 | 0     | N/A |
| hsa-miR-6844     | 5005-5011 | 7mer-m8 | -0.02 | 49 | -0.02 | 0     | N/A |
| hsa-miR-3689d    | 5011-5017 | 7mer-1A | -0.17 | 88 | -0.14 | 0     | N/A |
| hsa-miR-6851-5p  | 5011-5017 | 7mer-1A | -0.21 | 86 | -0.18 | 0     | N/A |
| hsa-miR-7847-3p  | 5012-5019 | 8mer    | -0.12 | 66 | -0.1  | 0     | N/A |

|                       |           |         |       |    |       |       |          |
|-----------------------|-----------|---------|-------|----|-------|-------|----------|
| hsa-miR-4491          | 5014-5020 | 7mer-m8 | -0.02 | 17 | -0.02 | 0     | N/A      |
| hsa-miR-4657          | 5014-5020 | 7mer-m8 | -0.02 | 16 | -0.02 | 0     | N/A      |
| hsa-miR-576-3p        | 5016-5022 | 7mer-m8 | -0.02 | 35 | -0.02 | 0.024 | N/A      |
| hsa-miR-5683          | 5018-5024 | 7mer-m8 | -0.02 | 42 | -0.02 | 0     | N/A      |
| hsa-miR-6787-3p       | 5026-5032 | 7mer-1A | -0.01 | 41 | -0.01 | 0     | N/A      |
| hsa-miR-4522          | 5030-5036 | 7mer-1A | -0.02 | 24 | -0.02 | 0     | N/A      |
| hsa-miR-526b-5p       | 5034-5040 | 7mer-1A | -0.01 | 34 | -0.01 | 0.099 | N/A      |
| hsa-miR-26b-3p        | 5044-5050 | 7mer-1A | -0.02 | 43 | -0.02 | 0.085 | N/A      |
| hsa-miR-3664-5p       | 5046-5052 | 7mer-m8 | -0.02 | 35 | -0.02 | 0     | N/A      |
| hsa-miR-4261          | 5051-5057 | 7mer-1A | -0.06 | 57 | -0.05 | 0.437 | N/A      |
| hsa-miR-3688-3p       | 5052-5058 | 7mer-m8 | -0.02 | 29 | -0.02 | 0.437 | N/A      |
| hsa-miR-490-5p        | 5054-5060 | 7mer-1A | -0.06 | 68 | -0.05 | 0.085 | N/A      |
| hsa-miR-205-5p        | 5057-5063 | 7mer-m8 | -0.02 | 44 | -0.02 | 0.216 | <<br>0.1 |
| hsa-miR-589-5p        | 5062-5068 | 7mer-m8 | -0.04 | 62 | -0.03 | 0.099 | N/A      |
| hsa-miR-4516          | 5064-5070 | 7mer-1A | -0.01 | 45 | -0.01 | 0     | N/A      |
| hsa-miR-4531          | 5064-5071 | 8mer    | -0.03 | 36 | -0.03 | 0     | N/A      |
| hsa-miR-4434          | 5064-5070 | 7mer-1A | -0.01 | 33 | -0.01 | 0     | N/A      |
| hsa-miR-5703          | 5064-5070 | 7mer-1A | -0.01 | 31 | -0.01 | 0     | N/A      |
| hsa-miR-620           | 5065-5071 | 7mer-1A | -0.01 | 31 | -0.01 | 0     | N/A      |
| hsa-miR-1270          | 5065-5071 | 7mer-1A | -0.01 | 30 | -0.01 | 0     | N/A      |
| hsa-miR-432-5p        | 5066-5072 | 7mer-m8 | -0.02 | 34 | -0.02 | 0.099 | N/A      |
| hsa-miR-636           | 5069-5075 | 7mer-m8 | -0.02 | 31 | -0.02 | 0.085 | N/A      |
| hsa-miR-302c-3p.<br>2 | 5070-5077 | 8mer    | -0.03 | 55 | -0.03 | 1.422 | 0.1<br>2 |

|                 |           |         |       |    |       |       |          |
|-----------------|-----------|---------|-------|----|-------|-------|----------|
| hsa-miR-520f-3p | 5070-5077 | 8mer    | -0.03 | 53 | -0.03 | 1.422 | 0.1<br>2 |
| hsa-miR-512-3p  | 5071-5077 | 7mer-1A | -0.01 | 24 | -0.01 | 0.099 | N/A      |
| hsa-miR-4473    | 5071-5077 | 7mer-m8 | -0.02 | 13 | -0.02 | 0     | N/A      |
| hsa-miR-6080    | 5072-5079 | 8mer    | -0.1  | 74 | -0.08 | 0     | N/A      |
| hsa-miR-5088-3p | 5077-5084 | 8mer    | -0.04 | 55 | -0.03 | 0     | N/A      |
| hsa-miR-4287    | 5079-5086 | 8mer    | -0.03 | 59 | -0.03 | 0     | N/A      |
| hsa-miR-4685-3p | 5079-5086 | 8mer    | -0.03 | 57 | -0.03 | 0     | N/A      |
| hsa-miR-4469    | 5080-5086 | 7mer-1A | -0.01 | 42 | -0.01 | 0     | N/A      |
| hsa-miR-6867-3p | 5080-5086 | 7mer-m8 | -0.02 | 32 | -0.02 | 0     | N/A      |
| hsa-miR-7113-3p | 5080-5086 | 7mer-1A | -0.01 | 30 | -0.01 | 0     | N/A      |
| hsa-miR-4639-3p | 5083-5089 | 7mer-m8 | -0.08 | 79 | -0.07 | 0.085 | N/A      |
| hsa-miR-7702    | 5089-5095 | 7mer-1A | -0.02 | 32 | -0.02 | 0     | N/A      |
| hsa-miR-1305    | 5101-5108 | 8mer    | -0.03 | 85 | -0.03 | 0     | N/A      |
| hsa-miR-3140-3p | 5105-5111 | 7mer-1A | -0.01 | 29 | -0.01 | 0     | N/A      |
| hsa-miR-6885-3p | 5107-5113 | 7mer-m8 | -0.02 | 46 | -0.02 | 0     | N/A      |
| hsa-miR-3121-5p | 5109-5116 | 8mer    | -0.16 | 89 | -0.13 | 0     | N/A      |
| hsa-miR-6083    | 5118-5124 | 7mer-1A | -0.01 | 45 | -0.01 | 0     | N/A      |
| hsa-miR-583     | 5132-5138 | 7mer-m8 | -0.02 | 58 | -0.02 | 0.099 | N/A      |
| hsa-miR-3978    | 5135-5141 | 7mer-m8 | -0.02 | 64 | -0.02 | 0     | N/A      |
| hsa-miR-3688-3p | 5136-5142 | 7mer-m8 | -0.02 | 29 | -0.02 | 0     | N/A      |
| hsa-miR-4694-3p | 5138-5144 | 7mer-m8 | -0.02 | 42 | -0.02 | 0     | N/A      |
| hsa-miR-5093    | 5140-5146 | 7mer-m8 | -0.02 | 40 | -0.02 | 0     | N/A      |
| hsa-miR-4496    | 5142-5148 | 7mer-1A | -0.01 | 64 | -0.01 | 0     | N/A      |
| hsa-miR-4311    | 5156-5163 | 8mer    | -0.03 | 78 | -0.03 | 0     | N/A      |

|                 |           |         |       |    |       |       |          |
|-----------------|-----------|---------|-------|----|-------|-------|----------|
| hsa-miR-1276    | 5157-5163 | 7mer-1A | -0.01 | 54 | -0.01 | 0     | N/A      |
| hsa-miR-583     | 5157-5163 | 7mer-1A | -0.01 | 49 | -0.01 | 0.085 | N/A      |
| hsa-miR-554     | 5172-5178 | 7mer-m8 | -0.12 | 78 | -0.1  | 0.099 | N/A      |
| hsa-miR-3923    | 5174-5180 | 7mer-1A | -0.1  | 62 | -0.08 | 0     | N/A      |
| hsa-miR-556-3p  | 5178-5184 | 7mer-1A | -0.01 | 38 | -0.01 | 0.024 | N/A      |
| hsa-miR-656-3p  | 5188-5194 | 7mer-m8 | -0.02 | 56 | -0.02 | 0.099 | N/A      |
| hsa-miR-6507-5p | 5192-5198 | 7mer-m8 | -0.02 | 59 | -0.02 | 0     | N/A      |
| hsa-miR-451b    | 5195-5201 | 7mer-m8 | -0.03 | 46 | -0.02 | 0     | N/A      |
| hsa-miR-195-5p  | 5198-5204 | 7mer-m8 | -0.15 | 80 | -0.12 | 1.266 | 0.1<br>3 |
| hsa-miR-16-5p   | 5198-5204 | 7mer-m8 | -0.15 | 80 | -0.12 | 1.266 | 0.1<br>3 |
| hsa-miR-15a-5p  | 5198-5204 | 7mer-m8 | -0.09 | 69 | -0.08 | 1.266 | 0.1<br>3 |
| hsa-miR-15b-5p  | 5198-5204 | 7mer-m8 | -0.08 | 66 | -0.07 | 1.266 | 0.1<br>3 |
| hsa-miR-424-5p  | 5198-5204 | 7mer-m8 | -0.07 | 63 | -0.06 | 1.266 | 0.1<br>3 |
| hsa-miR-6838-5p | 5198-5204 | 7mer-m8 | -0.06 | 57 | -0.05 | 1.266 | 0.1<br>3 |
| hsa-miR-497-5p  | 5198-5204 | 7mer-m8 | -0.04 | 53 | -0.04 | 1.266 | 0.1<br>3 |
| hsa-miR-6792-5p | 5200-5206 | 7mer-m8 | -0.02 | 48 | -0.02 | 0     | N/A      |
| hsa-miR-1207-3p | 5209-5215 | 7mer-1A | -0.01 | 34 | -0.01 | 0.024 | N/A      |
| hsa-miR-513b-3p | 5213-5219 | 7mer-m8 | -0.02 | 25 | -0.02 | 0     | N/A      |
| hsa-miR-196a-3p | 5219-5225 | 7mer-m8 | -0.05 | 40 | -0.05 | 0     | N/A      |

|                 |           |         |       |    |       |       |     |
|-----------------|-----------|---------|-------|----|-------|-------|-----|
| hsa-miR-3616-3p | 5222-5228 | 7mer-m8 | -0.14 | 67 | -0.12 | 0     | N/A |
| hsa-miR-6785-5p | 5224-5230 | 7mer-m8 | -0.13 | 77 | -0.11 | 0     | N/A |
| hsa-miR-6883-5p | 5224-5230 | 7mer-m8 | -0.11 | 70 | -0.09 | 0     | N/A |
| hsa-miR-4728-5p | 5224-5230 | 7mer-m8 | -0.12 | 70 | -0.1  | 0     | N/A |
| hsa-miR-149-3p  | 5224-5230 | 7mer-m8 | -0.08 | 60 | -0.07 | 0     | N/A |
| hsa-miR-1321    | 5225-5232 | 8mer    | -0.05 | 56 | -0.05 | 0     | N/A |
| hsa-miR-4756-5p | 5225-5232 | 8mer    | -0.03 | 45 | -0.03 | 0     | N/A |
| hsa-miR-4739    | 5225-5232 | 8mer    | -0.03 | 40 | -0.03 | 0     | N/A |
| hsa-miR-3162-5p | 5226-5233 | 8mer    | -0.03 | 24 | -0.03 | 0     | N/A |
| hsa-miR-6760-5p | 5226-5232 | 7mer-1A | -0.02 | 22 | -0.01 | 0     | N/A |
| hsa-miR-2909    | 5228-5234 | 7mer-1A | -0.01 | 34 | -0.01 | 0     | N/A |
| hsa-miR-656-5p  | 5235-5241 | 7mer-1A | -0.12 | 72 | -0.11 | 0     | N/A |
| hsa-miR-890     | 5239-5245 | 7mer-1A | -0.05 | 53 | -0.04 | 0.099 | N/A |
| hsa-miR-548an   | 5246-5252 | 7mer-1A | -0.12 | 81 | -0.1  | 0     | N/A |
| hsa-miR-4484    | 5246-5252 | 7mer-1A | -0.07 | 76 | -0.06 | 0     | N/A |
| hsa-miR-6768-3p | 5246-5252 | 7mer-1A | -0.01 | 43 | -0.01 | 0     | N/A |
| hsa-miR-4668-5p | 5253-5259 | 7mer-1A | -0.14 | 83 | -0.12 | 0     | N/A |
| hsa-miR-6739-5p | 5253-5259 | 7mer-1A | -0.08 | 74 | -0.07 | 0     | N/A |
| hsa-miR-3153    | 5253-5259 | 7mer-1A | -0.04 | 73 | -0.03 | 0     | N/A |
| hsa-miR-6733-5p | 5253-5259 | 7mer-1A | -0.07 | 71 | -0.06 | 0     | N/A |
| hsa-miR-4654    | 5255-5261 | 7mer-1A | -0.18 | 88 | -0.15 | 0.024 | N/A |
| hsa-miR-4769-5p | 5255-5261 | 7mer-1A | -0.12 | 85 | -0.1  | 0.024 | N/A |
| hsa-miR-4648    | 5255-5261 | 7mer-1A | -0.08 | 71 | -0.06 | 0     | N/A |
| hsa-miR-1233-5p | 5255-5261 | 7mer-1A | -0.11 | 58 | -0.1  | 0     | N/A |
| hsa-miR-6778-5p | 5255-5261 | 7mer-1A | -0.11 | 57 | -0.1  | 0     | N/A |

|                   |           |               |       |     |       |       |     |
|-------------------|-----------|---------------|-------|-----|-------|-------|-----|
| hsa-miR-134-3p    | 5256-5262 | 7mer-m8       | -0.13 | 81  | -0.11 | 0.085 | N/A |
| hsa-miR-4318      | 5257-5263 | 7mer-m8       | -0.07 | 67  | -0.06 | 0     | N/A |
| hsa-miR-6760-3p   | 5259-5265 | 7mer-1A       | -0.01 | 39  | -0.01 | 0     | N/A |
| hsa-miR-1208      | 5259-5265 | 7mer-1A       | -0.01 | 32  | -0.01 | 0.024 | N/A |
| hsa-miR-653-3p    | 5260-5266 | 7mer-1A       | -0.04 | 67  | -0.04 | 0.085 | N/A |
| hsa-miR-181b-2-3p | 5260-5266 | 7mer-1A       | -0.05 | 65  | -0.04 | 0     | N/A |
| hsa-miR-181b-3p   | 5260-5266 | 7mer-1A       | -0.05 | 65  | -0.04 | 0     | N/A |
| hsa-miR-4420      | 5260-5266 | 7mer-1A       | -0.01 | 42  | -0.01 | 0     | N/A |
| hsa-miR-3606-3p   | 5261-5272 | non-canonical | N/A   | N/A | N/A   | 0     | N/A |
| hsa-miR-3606-3p   | 5261-5272 | non-canonical | N/A   | N/A | N/A   | 0     | N/A |
| hsa-miR-15a-3p    | 5276-5282 | 7mer-1A       | -0.02 | 43  | -0.02 | 0     | N/A |
| hsa-miR-4717-5p   | 5276-5282 | 7mer-1A       | -0.01 | 39  | -0.01 | 0     | N/A |
| hsa-miR-5704      | 5276-5282 | 7mer-m8       | -0.04 | 12  | -0.04 | 0     | N/A |
| hsa-miR-1295b-3p  | 5277-5283 | 7mer-m8       | -0.14 | 76  | -0.12 | 0     | N/A |
| hsa-miR-379-3p    | 5286-5292 | 7mer-m8       | -0.04 | 81  | -0.04 | 1.438 | N/A |
| hsa-miR-411-3p    | 5286-5292 | 7mer-m8       | -0.04 | 81  | -0.04 | 1.438 | N/A |
| hsa-miR-2054      | 5291-5297 | 7mer-1A       | -0.01 | 46  | -0.01 | 0     | N/A |
| hsa-miR-5001-3p   | 5299-5305 | 7mer-m8       | -0.13 | 82  | -0.11 | 0     | N/A |
| hsa-miR-4635      | 5307-5313 | 7mer-1A       | -0.06 | 80  | -0.05 | 0     | N/A |
| hsa-miR-6881-3p   | 5310-5316 | 7mer-m8       | -0.04 | 54  | -0.03 | 0     | N/A |
| hsa-miR-877-3p    | 5310-5316 | 7mer-1A       | -0.01 | 28  | -0.01 | 0     | N/A |
| hsa-miR-888-5p    | 5317-5323 | 7mer-1A       | -0.07 | 69  | -0.06 | 0     | N/A |

|                 |           |         |       |    |       |       |       |
|-----------------|-----------|---------|-------|----|-------|-------|-------|
| hsa-miR-550b-3p | 5319-5325 | 7mer-m8 | -0.1  | 83 | -0.09 | 0     | N/A   |
| hsa-miR-606     | 5324-5330 | 7mer-m8 | -0.02 | 28 | -0.02 | 0.024 | N/A   |
| hsa-miR-578     | 5348-5354 | 7mer-m8 | -0.02 | 50 | -0.02 | 0.085 | N/A   |
| hsa-miR-4452    | 5352-5359 | 8mer    | -0.12 | 92 | -0.1  | 0     | N/A   |
| hsa-miR-183-3p  | 5353-5359 | 7mer-1A | -0.01 | 43 | -0.01 | 0.085 | N/A   |
| hsa-miR-4635    | 5355-5361 | 7mer-1A | -0.07 | 84 | -0.06 | 0     | N/A   |
| hsa-miR-526b-5p | 5356-5362 | 7mer-1A | -0.03 | 53 | -0.03 | 0.099 | N/A   |
| hsa-miR-4778-3p | 5358-5364 | 7mer-1A | -0.01 | 32 | -0.01 | 0.437 | N/A   |
| hsa-miR-877-3p  | 5360-5367 | 8mer    | -0.09 | 73 | -0.08 | 0     | N/A   |
| hsa-miR-6881-3p | 5361-5367 | 7mer-m8 | -0.02 | 37 | -0.02 | 0     | N/A   |
| hsa-miR-4422    | 5371-5378 | 8mer    | -0.03 | 72 | -0.03 | 0     | N/A   |
| hsa-miR-6835-3p | 5372-5378 | 7mer-1A | -0.01 | 55 | -0.01 | 2.373 | N/A   |
| hsa-miR-9-3p    | 5373-5379 | 7mer-1A | -0.07 | 73 | -0.06 | 0.085 | N/A   |
| hsa-miR-302a-5p | 5375-5381 | 7mer-1A | -0.01 | 50 | -0.01 | 0.312 | N/A   |
| hsa-miR-33a-3p  | 5381-5387 | 7mer-m8 | -0.02 | 49 | -0.02 | 0     | N/A   |
| hsa-miR-7-1-3p  | 5385-5392 | 8mer    | -0.03 | 87 | -0.03 | 0     | N/A   |
| hsa-miR-7-2-3p  | 5385-5392 | 8mer    | -0.03 | 87 | -0.03 | 0     | N/A   |
| hsa-miR-495-3p  | 5386-5392 | 7mer-1A | -0.01 | 63 | -0.01 | 0.345 | N/A   |
| hsa-miR-5688    | 5386-5392 | 7mer-1A | -0.01 | 62 | -0.01 | 0.345 | N/A   |
| hsa-miR-568     | 5390-5396 | 7mer-m8 | -0.02 | 25 | -0.02 | 0.099 | N/A   |
| hsa-miR-206     | 5394-5400 | 7mer-m8 | -0.12 | 79 | -0.1  | 0.058 | < 0.1 |
| hsa-miR-1-3p    | 5394-5400 | 7mer-m8 | -0.12 | 79 | -0.1  | 0.058 | < 0.1 |
| hsa-miR-613     | 5394-5400 | 7mer-m8 | -0.1  | 74 | -0.08 | 0.058 | <     |

|                 |           |         |       |    |       |       |          |
|-----------------|-----------|---------|-------|----|-------|-------|----------|
|                 |           |         |       |    |       |       | 0.1      |
| hsa-miR-3928-3p | 5397-5403 | 7mer-1A | -0.01 | 50 | -0.01 | 0     | N/A      |
| hsa-miR-3915    | 5397-5403 | 7mer-m8 | -0.03 | 36 | -0.03 | 0     | N/A      |
| hsa-miR-1294    | 5399-5405 | 7mer-1A | -0.13 | 80 | -0.11 | 0.024 | N/A      |
| hsa-miR-4316    | 5399-5405 | 7mer-1A | -0.01 | 35 | -0.01 | 0     | N/A      |
| hsa-miR-758-3p  | 5401-5407 | 7mer-1A | -0.01 | 34 | -0.01 | 0.514 | N/A      |
| hsa-miR-4726-3p | 5412-5419 | 8mer    | -0.22 | 96 | -0.19 | 0     | N/A      |
| hsa-miR-6840-3p | 5413-5419 | 7mer-1A | -0.12 | 93 | -0.1  | 0     | N/A      |
| hsa-miR-1915-3p | 5413-5419 | 7mer-1A | -0.09 | 82 | -0.08 | 0.67  | N/A      |
| hsa-miR-6764-5p | 5413-5419 | 7mer-1A | -0.08 | 79 | -0.07 | 0.67  | N/A      |
| hsa-miR-4733-5p | 5415-5421 | 7mer-1A | -0.09 | 79 | -0.08 | 0     | N/A      |
| hsa-miR-376c-3p | 5426-5432 | 7mer-1A | -0.06 | 54 | -0.05 | 0     | N/A      |
| hsa-miR-221-3p  | 5428-5435 | 8mer    | -0.03 | 33 | -0.03 | 0     | <<br>0.1 |
| hsa-miR-222-3p  | 5428-5435 | 8mer    | -0.03 | 33 | -0.03 | 0     | <<br>0.1 |
| hsa-miR-548v    | 5429-5435 | 7mer-1A | -0.08 | 55 | -0.07 | 0     | N/A      |
| hsa-miR-187-5p  | 5429-5435 | 7mer-1A | -0.03 | 39 | -0.02 | 0.085 | N/A      |
| hsa-miR-6894-3p | 5433-5439 | 7mer-m8 | -0.13 | 86 | -0.11 | 0.085 | N/A      |
| hsa-miR-4763-5p | 5433-5439 | 7mer-1A | -0.07 | 47 | -0.06 | 0     | N/A      |
| hsa-miR-6890-3p | 5436-5442 | 7mer-m8 | -0.08 | 84 | -0.07 | 0     | N/A      |
| hsa-miR-603     | 5439-5445 | 7mer-m8 | -0.02 | 54 | -0.02 | 0.085 | N/A      |
| hsa-miR-570-3p  | 5443-5449 | 7mer-m8 | -0.02 | 25 | -0.02 | 0     | N/A      |
| hsa-miR-651-3p  | 5446-5452 | 7mer-m8 | -0.02 | 37 | -0.02 | 0     | N/A      |
| hsa-miR-1252-5p | 5447-5453 | 7mer-m8 | -0.02 | 20 | -0.02 | 0.024 | N/A      |

|                 |           |         |       |    |       |       |          |
|-----------------|-----------|---------|-------|----|-------|-------|----------|
| hsa-miR-4533    | 5448-5455 | 8mer    | -0.03 | 42 | -0.03 | 0     | N/A      |
| hsa-miR-3202    | 5449-5455 | 7mer-1A | -0.01 | 29 | -0.01 | 0     | N/A      |
| hsa-miR-4802-3p | 5452-5458 | 7mer-m8 | -0.05 | 52 | -0.04 | 0     | N/A      |
| hsa-miR-2467-3p | 5461-5467 | 7mer-1A | -0.07 | 63 | -0.06 | 0     | N/A      |
| hsa-miR-3678-3p | 5461-5467 | 7mer-m8 | -0.02 | 38 | -0.02 | 0     | N/A      |
| hsa-miR-3666    | 5464-5470 | 7mer-1A | -0.03 | 51 | -0.03 | 0.221 | <<br>0.1 |
| hsa-miR-4295    | 5464-5470 | 7mer-1A | -0.01 | 32 | -0.01 | 0.221 | <<br>0.1 |
| hsa-miR-130a-3p | 5464-5470 | 7mer-1A | -0.01 | 32 | -0.01 | 0.221 | <<br>0.1 |
| hsa-miR-301b-3p | 5464-5470 | 7mer-1A | -0.01 | 31 | -0.01 | 0.221 | <<br>0.1 |
| hsa-miR-301a-3p | 5464-5470 | 7mer-1A | -0.01 | 30 | -0.01 | 0.221 | <<br>0.1 |
| hsa-miR-130b-3p | 5464-5470 | 7mer-1A | -0.01 | 30 | -0.01 | 0.221 | <<br>0.1 |
| hsa-miR-454-3p  | 5464-5470 | 7mer-1A | -0.01 | 27 | -0.01 | 0.221 | <<br>0.1 |
| hsa-miR-4671-3p | 5464-5470 | 7mer-m8 | -0.02 | 5  | -0.02 | 0     | N/A      |
| hsa-miR-196a-5p | 5467-5473 | 7mer-m8 | -0.02 | 26 | -0.02 | 0.058 | <<br>0.1 |
| hsa-miR-196b-5p | 5467-5473 | 7mer-m8 | -0.02 | 26 | -0.02 | 0.058 | <<br>0.1 |
| hsa-miR-3665    | 5470-5476 | 7mer-1A | -0.1  | 63 | -0.09 | 0     | N/A      |
| hsa-miR-657     | 5470-5476 | 7mer-1A | -0.01 | 36 | -0.01 | 0.024 | N/A      |

|                  |           |         |       |    |       |       |     |
|------------------|-----------|---------|-------|----|-------|-------|-----|
| hsa-miR-1205     | 5471-5477 | 7mer-m8 | -0.03 | 63 | -0.03 | 0.024 | N/A |
| hsa-miR-4418     | 5472-5478 | 7mer-m8 | -0.02 | 52 | -0.02 | 0     | N/A |
| hsa-miR-509-5p   | 5472-5478 | 7mer-m8 | -0.02 | 51 | -0.02 | 0     | N/A |
| hsa-miR-509-3-5p | 5472-5478 | 7mer-m8 | -0.02 | 51 | -0.02 | 0     | N/A |
| hsa-miR-603      | 5476-5482 | 7mer-m8 | -0.02 | 54 | -0.02 | 0.085 | N/A |
| hsa-miR-1197     | 5479-5485 | 7mer-m8 | -0.02 | 52 | -0.02 | 0.49  | N/A |
| hsa-miR-5004-5p  | 5480-5486 | 7mer-m8 | -0.02 | 13 | -0.02 | 0     | N/A |
| hsa-miR-6847-5p  | 5482-5489 | 8mer    | -0.03 | 45 | -0.03 | 0     | N/A |
| hsa-miR-4257     | 5483-5489 | 7mer-1A | -0.03 | 62 | -0.03 | 0     | N/A |
| hsa-miR-7156-3p  | 5490-5497 | 8mer    | -0.2  | 89 | -0.17 | 0     | N/A |
| hsa-miR-1301-3p  | 5491-5497 | 7mer-1A | -0.14 | 83 | -0.12 | 0     | N/A |
| hsa-miR-5047     | 5491-5497 | 7mer-1A | -0.08 | 71 | -0.07 | 0     | N/A |
| hsa-miR-499b-5p  | 5496-5502 | 7mer-m8 | -0.02 | 37 | -0.02 | 0     | N/A |
| hsa-miR-1197     | 5501-5507 | 7mer-1A | -0.01 | 41 | -0.01 | 0.043 | N/A |
| hsa-miR-3942-3p  | 5507-5513 | 7mer-m8 | -0.02 | 55 | -0.02 | 0     | N/A |
| hsa-miR-5100     | 5507-5513 | 7mer-1A | -0.01 | 38 | -0.01 | 0     | N/A |
| hsa-miR-892c-5p  | 5508-5514 | 7mer-m8 | -0.02 | 32 | -0.02 | 0.099 | N/A |
| hsa-miR-6716-5p  | 5513-5519 | 7mer-1A | -0.1  | 65 | -0.09 | 0     | N/A |
| hsa-miR-204-3p   | 5514-5520 | 7mer-m8 | -0.02 | 50 | -0.02 | 0     | N/A |
| hsa-miR-4646-5p  | 5514-5520 | 7mer-m8 | -0.02 | 33 | -0.02 | 0     | N/A |
| hsa-miR-4731-5p  | 5516-5522 | 7mer-1A | -0.05 | 58 | -0.05 | 0     | N/A |
| hsa-miR-5589-5p  | 5516-5522 | 7mer-1A | -0.01 | 37 | -0.01 | 0     | N/A |
| hsa-miR-3692-5p  | 5517-5524 | 8mer    | -0.17 | 89 | -0.14 | 0     | N/A |
| hsa-miR-93-3p    | 5518-5524 | 7mer-1A | -0.1  | 77 | -0.08 | 0.085 | N/A |
| hsa-miR-6071     | 5518-5525 | 8mer    | -0.03 | 45 | -0.03 | 0     | N/A |

|                   |           |         |       |    |       |       |       |
|-------------------|-----------|---------|-------|----|-------|-------|-------|
| hsa-miR-6828-3p   | 5519-5525 | 7mer-1A | -0.01 | 33 | -0.01 | 0     | N/A   |
| hsa-miR-103a-2-5p | 5522-5528 | 7mer-1A | -0.01 | 21 | -0.01 | 0.723 | N/A   |
| hsa-miR-302c-3p.2 | 5524-5531 | 8mer    | -0.03 | 55 | -0.03 | 0.383 | < 0.1 |
| hsa-miR-520f-3p   | 5524-5531 | 8mer    | -0.03 | 53 | -0.03 | 0.383 | < 0.1 |
| hsa-miR-512-3p    | 5525-5531 | 7mer-1A | -0.07 | 71 | -0.06 | 0.099 | N/A   |
| hsa-miR-4473      | 5525-5532 | 8mer    | -0.16 | 70 | -0.14 | 0     | N/A   |
| hsa-miR-4671-3p   | 5526-5532 | 7mer-1A | -0.11 | 54 | -0.09 | 0     | N/A   |
| hsa-miR-103a-2-5p | 5531-5537 | 7mer-m8 | -0.08 | 70 | -0.07 | 0.085 | N/A   |
| hsa-miR-4633-3p   | 5535-5541 | 7mer-1A | -0.14 | 78 | -0.12 | 0     | N/A   |
| hsa-miR-6500-5p   | 5535-5541 | 7mer-1A | -0.13 | 76 | -0.11 | 0     | N/A   |
| hsa-miR-6874-5p   | 5535-5541 | 7mer-m8 | -0.08 | 62 | -0.07 | 0     | N/A   |
| hsa-miR-6880-5p   | 5537-5543 | 7mer-m8 | -0.1  | 59 | -0.08 | 0     | N/A   |
| hsa-miR-6745      | 5538-5544 | 7mer-m8 | -0.11 | 67 | -0.09 | 0.085 | N/A   |
| hsa-miR-363-5p    | 5538-5544 | 7mer-m8 | -0.09 | 63 | -0.08 | 0.085 | N/A   |
| hsa-miR-6800-5p   | 5547-5553 | 7mer-m8 | -0.03 | 29 | -0.03 | 0     | N/A   |
| hsa-miR-4686      | 5553-5560 | 8mer    | -0.14 | 82 | -0.12 | 0     | N/A   |
| hsa-miR-2355-5p   | 5567-5573 | 7mer-1A | -0.14 | 80 | -0.12 | 0     | N/A   |
| hsa-miR-3679-3p   | 5568-5574 | 7mer-1A | -0.1  | 72 | -0.09 | 0     | N/A   |
| hsa-miR-4446-5p   | 5569-5575 | 7mer-1A | -0.01 | 28 | -0.01 | 0     | N/A   |
| hsa-miR-502-3p    | 5585-5591 | 7mer-1A | -0.09 | 74 | -0.08 | 0.123 | N/A   |
| hsa-miR-501-3p    | 5585-5591 | 7mer-1A | -0.09 | 74 | -0.08 | 0.123 | N/A   |

|                       |           |         |       |    |       |       |          |
|-----------------------|-----------|---------|-------|----|-------|-------|----------|
| hsa-miR-675-3p        | 5587-5593 | 7mer-m8 | -0.13 | 85 | -0.11 | 0.085 | N/A      |
| hsa-miR-203a-3p.<br>1 | 5591-5597 | 7mer-m8 | -0.02 | 50 | -0.02 | 0.497 | <<br>0.1 |
| hsa-miR-5680          | 5592-5598 | 7mer-m8 | -0.02 | 68 | -0.02 | 0     | N/A      |
| hsa-miR-324-5p        | 5599-5605 | 7mer-1A | -0.11 | 68 | -0.1  | 0.154 | N/A      |
| hsa-miR-5700          | 5601-5607 | 7mer-m8 | -0.02 | 48 | -0.02 | 0     | N/A      |
| hsa-miR-145-3p        | 5627-5633 | 7mer-m8 | -0.03 | 53 | -0.03 | 0.085 | N/A      |
| hsa-miR-3159          | 5630-5636 | 7mer-1A | -0.01 | 15 | -0.01 | 0     | N/A      |
| hsa-miR-3926          | 5645-5652 | 8mer    | -0.08 | 65 | -0.07 | 0     | N/A      |
| hsa-miR-548s          | 5646-5652 | 7mer-m8 | -0.07 | 67 | -0.06 | 0     | N/A      |
| hsa-miR-7108-5p       | 5648-5655 | 8mer    | -0.24 | 95 | -0.2  | 0     | N/A      |
| hsa-miR-663b          | 5648-5654 | 7mer-1A | -0.03 | 51 | -0.03 | 0.024 | N/A      |
| hsa-miR-4474-3p       | 5649-5655 | 7mer-1A | -0.08 | 65 | -0.07 | 0     | N/A      |
| hsa-miR-2113          | 5651-5657 | 7mer-1A | -0.01 | 42 | -0.01 | 0     | N/A      |
| hsa-miR-5010-3p       | 5651-5657 | 7mer-1A | -0.01 | 31 | -0.01 | 0     | N/A      |
| hsa-miR-451b          | 5662-5668 | 7mer-m8 | -0.1  | 80 | -0.08 | 0     | N/A      |
| hsa-miR-3120-3p       | 5664-5671 | 8mer    | -0.06 | 69 | -0.05 | 0.335 | N/A      |
| hsa-let-7a-2-3p       | 5667-5674 | 8mer    | -0.07 | 70 | -0.06 | 0.085 | N/A      |
| hsa-let-7g-3p         | 5667-5674 | 8mer    | -0.06 | 69 | -0.05 | 0.085 | N/A      |
| hsa-let-7c-3p         | 5668-5674 | 7mer-1A | -0.02 | 42 | -0.02 | 0.085 | N/A      |
| hsa-miR-493-5p        | 5668-5674 | 7mer-1A | -0.01 | 31 | -0.01 | 0.213 | N/A      |
| hsa-miR-508-3p        | 5675-5681 | 7mer-m8 | -0.09 | 60 | -0.07 | 0.024 | N/A      |
| hsa-miR-5186          | 5677-5683 | 7mer-m8 | -0.07 | 69 | -0.06 | 0     | N/A      |
| hsa-miR-4775          | 5688-5694 | 7mer-1A | -0.01 | 30 | -0.01 | 0     | N/A      |
| hsa-miR-4661-3p       | 5697-5703 | 7mer-1A | -0.01 | 26 | -0.01 | 0     | N/A      |

|                  |           |         |       |    |       |       |          |
|------------------|-----------|---------|-------|----|-------|-------|----------|
| hsa-miR-4762-5p  | 5706-5712 | 7mer-1A | -0.01 | 30 | -0.01 | 0     | N/A      |
| hsa-miR-1306-5p  | 5725-5731 | 7mer-1A | -0.04 | 56 | -0.03 | 1.567 | <<br>0.1 |
| hsa-miR-6879-3p  | 5727-5733 | 7mer-1A | -0.02 | 33 | -0.02 | 0     | N/A      |
| hsa-miR-3610     | 5740-5746 | 7mer-1A | -0.17 | 70 | -0.15 | 0     | N/A      |
| hsa-miR-2053     | 5743-5750 | 8mer    | -0.03 | 83 | -0.03 | 0     | N/A      |
| hsa-miR-569      | 5743-5749 | 7mer-1A | -0.01 | 25 | -0.01 | 0.024 | N/A      |
| hsa-miR-1267     | 5748-5754 | 7mer-1A | -0.14 | 82 | -0.12 | 0.024 | N/A      |
| hsa-miR-367-5p   | 5748-5754 | 7mer-1A | -0.13 | 80 | -0.11 | 0     | N/A      |
| hsa-miR-3120-5p  | 5751-5757 | 7mer-m8 | -0.1  | 79 | -0.08 | 0     | N/A      |
| hsa-miR-626      | 5752-5759 | 8mer    | -0.25 | 89 | -0.21 | 0.024 | N/A      |
| hsa-miR-6876-3p  | 5752-5759 | 8mer    | -0.25 | 89 | -0.21 | 0.024 | N/A      |
| hsa-miR-4670-3p  | 5761-5767 | 7mer-m8 | -0.04 | 46 | -0.03 | 0     | N/A      |
| hsa-miR-548ad-3p | 5766-5773 | 8mer    | -0.03 | 46 | -0.03 | 0     | N/A      |
| hsa-miR-424-3p   | 5767-5773 | 7mer-1A | -0.11 | 79 | -0.1  | 0     | N/A      |
| hsa-miR-4799-5p  | 5770-5776 | 7mer-1A | -0.01 | 35 | -0.01 | 0     | N/A      |
| hsa-miR-4263     | 5771-5777 | 7mer-1A | -0.01 | 40 | -0.01 | 0     | N/A      |
| hsa-miR-576-5p   | 5771-5777 | 7mer-1A | -0.01 | 37 | -0.01 | 0     | N/A      |
| hsa-miR-33a-3p   | 5775-5781 | 7mer-m8 | -0.02 | 49 | -0.02 | 0     | N/A      |
| hsa-miR-1273e    | 5781-5788 | 8mer    | -0.11 | 73 | -0.09 | 0     | N/A      |
| hsa-miR-320d     | 5790-5796 | 7mer-1A | -0.04 | 70 | -0.03 | 1.192 | N/A      |
| hsa-miR-320c     | 5790-5796 | 7mer-1A | -0.04 | 69 | -0.03 | 1.192 | N/A      |
| hsa-miR-320b     | 5790-5796 | 7mer-1A | -0.04 | 69 | -0.03 | 1.192 | N/A      |
| hsa-miR-320a     | 5790-5796 | 7mer-1A | -0.04 | 69 | -0.03 | 1.192 | N/A      |
| hsa-miR-4429     | 5790-5796 | 7mer-1A | -0.03 | 63 | -0.02 | 1.192 | N/A      |

|                  |           |         |       |    |       |       |          |
|------------------|-----------|---------|-------|----|-------|-------|----------|
| hsa-miR-9-3p     | 5790-5796 | 7mer-m8 | -0.04 | 60 | -0.04 | 0.65  | N/A      |
| hsa-miR-340-5p   | 5792-5798 | 7mer-m8 | -0.02 | 76 | -0.02 | 1.278 | N/A      |
| hsa-miR-142-5p   | 5792-5798 | 7mer-1A | -0.01 | 44 | -0.01 | 1.278 | <<br>0.1 |
| hsa-miR-5590-3p  | 5792-5798 | 7mer-1A | -0.01 | 41 | -0.01 | 1.278 | <<br>0.1 |
| hsa-miR-127-5p   | 5798-5805 | 8mer    | -0.13 | 84 | -0.11 | 0     | N/A      |
| hsa-miR-6806-3p  | 5798-5804 | 7mer-1A | -0.05 | 68 | -0.04 | 0     | N/A      |
| hsa-miR-3928-5p  | 5798-5804 | 7mer-1A | -0.03 | 56 | -0.02 | 0     | N/A      |
| hsa-miR-7843-3p  | 5799-5805 | 7mer-1A | -0.03 | 48 | -0.02 | 0     | N/A      |
| hsa-miR-4781-3p  | 5803-5809 | 7mer-1A | -0.09 | 83 | -0.08 | 0     | N/A      |
| hsa-miR-424-3p   | 5814-5821 | 8mer    | -0.11 | 79 | -0.09 | 0     | N/A      |
| hsa-miR-548ad-3p | 5815-5821 | 7mer-1A | -0.03 | 48 | -0.03 | 0     | N/A      |
| hsa-miR-4761-5p  | 5822-5828 | 7mer-1A | -0.1  | 74 | -0.08 | 0     | N/A      |
| hsa-miR-561-5p   | 5823-5829 | 7mer-1A | -0.19 | 88 | -0.16 | 0     | N/A      |
| hsa-miR-498      | 5824-5830 | 7mer-1A | -0.01 | 48 | -0.01 | 0.099 | N/A      |
| hsa-miR-5582-3p  | 5829-5835 | 7mer-m8 | -0.02 | 65 | -0.02 | 0.335 | N/A      |
| hsa-miR-1323     | 5830-5836 | 7mer-m8 | -0.02 | 52 | -0.02 | 0.099 | N/A      |
| hsa-miR-548o-3p  | 5830-5836 | 7mer-m8 | -0.02 | 51 | -0.02 | 0.099 | N/A      |
| hsa-miR-548aw    | 5832-5839 | 8mer    | -0.03 | 73 | -0.03 | 0     | N/A      |
| hsa-miR-548f-5p  | 5832-5838 | 7mer-1A | -0.01 | 35 | -0.01 | 0     | N/A      |
| hsa-miR-548g-5p  | 5832-5838 | 7mer-1A | -0.01 | 35 | -0.01 | 0     | N/A      |
| hsa-miR-548aj-5p | 5832-5838 | 7mer-1A | -0.01 | 35 | -0.01 | 0     | N/A      |
| hsa-miR-548x-5p  | 5832-5838 | 7mer-1A | -0.01 | 35 | -0.01 | 0     | N/A      |
| hsa-miR-1468-3p  | 5832-5838 | 7mer-1A | -0.01 | 26 | -0.01 | 0     | N/A      |

|                 |           |         |       |    |       |       |          |
|-----------------|-----------|---------|-------|----|-------|-------|----------|
| hsa-miR-527     | 5833-5839 | 7mer-1A | -0.01 | 44 | -0.01 | 0.024 | N/A      |
| hsa-miR-518a-5p | 5833-5839 | 7mer-1A | -0.01 | 44 | -0.01 | 0.024 | N/A      |
| hsa-miR-4317    | 5836-5842 | 7mer-1A | -0.05 | 61 | -0.05 | 0     | N/A      |
| hsa-miR-3160-5p | 5844-5850 | 7mer-1A | -0.01 | 25 | -0.01 | 0     | N/A      |
| hsa-miR-429     | 5849-5855 | 7mer-m8 | -0.02 | 52 | -0.02 | 1.508 | 0.1<br>1 |
| hsa-miR-200b-3p | 5849-5855 | 7mer-m8 | -0.02 | 52 | -0.02 | 1.508 | 0.1<br>1 |
| hsa-miR-200c-3p | 5849-5855 | 7mer-m8 | -0.02 | 52 | -0.02 | 1.508 | 0.1<br>1 |
| hsa-let-7c-3p   | 5855-5862 | 8mer    | -0.08 | 75 | -0.07 | 1.288 | N/A      |
| hsa-let-7g-3p   | 5856-5862 | 7mer-1A | -0.12 | 84 | -0.1  | 1.288 | N/A      |
| hsa-let-7a-2-3p | 5856-5862 | 7mer-1A | -0.09 | 78 | -0.08 | 1.288 | N/A      |
| hsa-miR-664b-3p | 5860-5867 | 8mer    | -0.03 | 78 | -0.03 | 0.099 | N/A      |
| hsa-miR-579-3p  | 5860-5867 | 8mer    | -0.03 | 76 | -0.03 | 0.099 | N/A      |
| hsa-miR-5696    | 5861-5867 | 7mer-1A | -0.01 | 34 | -0.01 | 0     | N/A      |
| hsa-miR-335-3p  | 5863-5869 | 7mer-m8 | -0.02 | 61 | -0.02 | 0.085 | N/A      |
| hsa-miR-3140-3p | 5866-5872 | 7mer-1A | -0.01 | 36 | -0.01 | 0     | N/A      |
| hsa-miR-6071    | 5869-5875 | 7mer-1A | -0.12 | 80 | -0.11 | 0     | N/A      |
| hsa-miR-6828-3p | 5869-5875 | 7mer-1A | -0.07 | 70 | -0.06 | 0     | N/A      |
| hsa-miR-3123    | 5875-5881 | 7mer-m8 | -0.02 | 58 | -0.02 | 0     | N/A      |
| hsa-miR-4311    | 5877-5883 | 7mer-m8 | -0.02 | 52 | -0.02 | 0     | N/A      |
| hsa-miR-3163    | 5881-5887 | 7mer-1A | -0.01 | 45 | -0.01 | 0     | N/A      |
| hsa-miR-497-3p  | 5888-5894 | 7mer-1A | -0.01 | 55 | -0.01 | 0.085 | N/A      |
| hsa-miR-4709-5p | 5896-5903 | 8mer    | -0.13 | 89 | -0.11 | 0     | N/A      |

|                  |           |         |       |    |       |       |          |
|------------------|-----------|---------|-------|----|-------|-------|----------|
| hsa-miR-3192-3p  | 5902-5909 | 8mer    | -0.18 | 93 | -0.15 | 0     | N/A      |
| hsa-miR-3151-3p  | 5902-5908 | 7mer-1A | -0.07 | 64 | -0.06 | 0     | N/A      |
| hsa-miR-4762-3p  | 5903-5910 | 8mer    | -0.03 | 63 | -0.03 | 0     | N/A      |
| hsa-miR-888-5p   | 5924-5930 | 7mer-1A | -0.12 | 85 | -0.1  | 0.085 | N/A      |
| hsa-miR-200c-3p  | 5927-5933 | 7mer-1A | -0.03 | 63 | -0.02 | 1.794 | 0.1<br>4 |
| hsa-miR-200b-3p  | 5927-5933 | 7mer-1A | -0.03 | 62 | -0.02 | 1.794 | 0.1<br>4 |
| hsa-miR-8084     | 5927-5933 | 7mer-1A | -0.02 | 54 | -0.01 | 0     | N/A      |
| hsa-miR-429      | 5927-5933 | 7mer-1A | -0.02 | 49 | -0.01 | 1.794 | 0.1<br>4 |
| hsa-miR-374c-5p  | 5928-5934 | 7mer-1A | -0.05 | 52 | -0.04 | 2.013 | N/A      |
| hsa-miR-655-3p   | 5928-5934 | 7mer-1A | -0.03 | 42 | -0.03 | 2.013 | N/A      |
| hsa-miR-4775     | 5935-5941 | 7mer-m8 | -0.02 | 47 | -0.02 | 0     | N/A      |
| hsa-miR-590-3p   | 5935-5941 | 7mer-1A | -0.01 | 34 | -0.01 | 0.099 | N/A      |
| hsa-miR-4735-5p  | 5936-5943 | 8mer    | -0.06 | 85 | -0.05 | 0     | N/A      |
| hsa-miR-1277-5p  | 5946-5952 | 7mer-1A | -0.01 | 40 | 0     | 0     | N/A      |
| hsa-miR-5692c    | 5947-5953 | 7mer-m8 | -0.02 | 58 | 0     | 0     | N/A      |
| hsa-miR-5692b    | 5947-5953 | 7mer-m8 | -0.02 | 58 | 0     | 0     | N/A      |
| hsa-miR-3133     | 5959-5966 | 8mer    | -0.03 | 87 | 0     | 0     | N/A      |
| hsa-miR-186-5p   | 5960-5966 | 7mer-1A | -0.01 | 59 | 0     | 2.948 | N/A      |
| hsa-miR-4433a-3p | 5966-5973 | 8mer    | -0.17 | 94 | 0     | 0     | N/A      |
| hsa-miR-4768-3p  | 5967-5973 | 7mer-1A | -0.18 | 94 | 0     | 0     | N/A      |
| hsa-miR-4459     | 5967-5973 | 7mer-1A | -0.15 | 90 | 0     | 0     | N/A      |
| hsa-miR-3664-3p  | 5968-5974 | 7mer-m8 | -0.18 | 93 | 0     | 0     | N/A      |

|                 |           |         |       |    |   |       |     |
|-----------------|-----------|---------|-------|----|---|-------|-----|
| hsa-miR-510-5p  | 5969-5976 | 8mer    | -0.29 | 97 | 0 | 0     | N/A |
| hsa-miR-512-5p  | 5970-5976 | 7mer-1A | -0.06 | 72 | 0 | 0     | N/A |
| hsa-miR-548ai   | 5975-5981 | 7mer-1A | -0.1  | 73 | 0 | 0     | N/A |
| hsa-miR-570-5p  | 5975-5981 | 7mer-1A | -0.1  | 73 | 0 | 0     | N/A |
| hsa-miR-548ag   | 5975-5981 | 7mer-1A | -0.07 | 66 | 0 | 0     | N/A |
| hsa-miR-548ba   | 5975-5981 | 7mer-1A | -0.07 | 64 | 0 | 0     | N/A |
| hsa-miR-4795-3p | 5981-5987 | 7mer-1A | -0.03 | 62 | 0 | 0     | N/A |
| hsa-miR-126-5p  | 5982-5989 | 8mer    | -0.03 | 68 | 0 | 0     | N/A |
| hsa-miR-4795-3p | 5983-5990 | 8mer    | -0.03 | 63 | 0 | 0     | N/A |
| hsa-miR-126-5p  | 5985-5992 | 8mer    | -0.03 | 68 | 0 | 0     | N/A |
| hsa-miR-4795-3p | 5986-5993 | 8mer    | -0.03 | 63 | 0 | 0     | N/A |
| hsa-miR-126-5p  | 5988-5994 | 7mer-m8 | -0.02 | 51 | 0 | 0.67  | N/A |
| hsa-miR-323a-3p | 5991-5997 | 7mer-1A | -0.01 | 52 | 0 | 0.67  | N/A |
| hsa-miR-6507-5p | 5996-6002 | 7mer-m8 | -0.02 | 59 | 0 | 0     | N/A |
| hsa-miR-186-5p  | 5997-6003 | 7mer-m8 | -0.02 | 73 | 0 | 1.972 | N/A |
| hsa-miR-495-3p  | 6001-6007 | 7mer-1A | -0.01 | 63 | 0 | 2.043 | N/A |
| hsa-miR-5688    | 6001-6007 | 7mer-1A | -0.01 | 62 | 0 | 2.043 | N/A |
| hsa-miR-7-2-3p  | 6001-6007 | 7mer-1A | -0.01 | 59 | 0 | 0.437 | N/A |
| hsa-miR-7-1-3p  | 6001-6007 | 7mer-1A | -0.01 | 59 | 0 | 0.437 | N/A |
| hsa-miR-2053    | 6005-6011 | 7mer-1A | -0.01 | 46 | 0 | 0     | N/A |



|                      |                        |                         |          |                        |      |              |                  |              |                  |   |   |   |                      |   |   |   |   |   |   |   |    |  |
|----------------------|------------------------|-------------------------|----------|------------------------|------|--------------|------------------|--------------|------------------|---|---|---|----------------------|---|---|---|---|---|---|---|----|--|
| 84                   | 3p                     | 648                     |          | ding                   |      |              | 67               |              | 67               |   |   |   |                      |   |   |   |   |   |   |   |    |  |
| MIMAT<br>00000<br>84 | hsa-mi<br>R-27a-<br>3p | ENSG00<br>000146<br>648 | EGF<br>R | prote<br>in_co<br>ding | chr7 | 5527<br>3510 | 552<br>735<br>16 | 5527<br>3489 | 552<br>735<br>17 | + | 4 | 0 | AG01<br>-4, A<br>G02 | 1 | 0 | 1 | 1 | 1 | 1 | 0 | 3  |  |
| MIMAT<br>00000<br>84 | hsa-mi<br>R-27a-<br>3p | ENSG00<br>000146<br>648 | EGF<br>R | prote<br>in_co<br>ding | chr7 | 5527<br>5943 | 552<br>759<br>49 | 5527<br>5922 | 552<br>759<br>50 | + | 2 | 0 | AG01<br>-4           | 0 | 0 | 1 | 1 | 0 | 0 | 0 | 3  |  |
| MIMAT<br>00000<br>87 | hsa-mi<br>R-30a-<br>5p | ENSG00<br>000146<br>648 | EGF<br>R | prote<br>in_co<br>ding | chr7 | 5527<br>3438 | 552<br>734<br>43 | 5527<br>3438 | 552<br>734<br>43 | + | 5 | 0 | AG01<br>-4, A<br>G02 | 1 | 0 | 0 | 0 | 0 | 0 | 0 | 6  |  |
| MIMAT<br>00000<br>90 | hsa-mi<br>R-32-5<br>p  | ENSG00<br>000146<br>648 | EGF<br>R | prote<br>in_co<br>ding | chr7 | 5527<br>9123 | 552<br>791<br>51 | 5527<br>9123 | 552<br>791<br>51 | + | 1 | 0 | AG01<br>-4           | 0 | 0 | 0 | 1 | 0 | 0 | 0 | 15 |  |
| MIMAT<br>00000<br>91 | hsa-mi<br>R-33a-<br>5p | ENSG00<br>000146<br>648 | EGF<br>R | prote<br>in_co<br>ding | chr7 | 5523<br>8699 | 552<br>387<br>04 | 5523<br>8685 | 552<br>387<br>05 | + | 1 | 0 | AG02                 | 1 | 0 | 0 | 0 | 1 | 0 | 0 | 15 |  |
| MIMAT<br>00000<br>91 | hsa-mi<br>R-33a-<br>5p | ENSG00<br>000146<br>648 | EGF<br>R | prote<br>in_co<br>ding | chr7 | 5527<br>4271 | 552<br>742<br>76 | 5527<br>4271 | 552<br>742<br>76 | + | 2 | 2 | AG01<br>-4, A<br>G02 | 1 | 0 | 0 | 0 | 0 | 0 | 0 | 15 |  |
| MIMAT<br>00000<br>92 | hsa-mi<br>R-92a-<br>3p | ENSG00<br>000146<br>648 | EGF<br>R | prote<br>in_co<br>ding | chr7 | 5527<br>9123 | 552<br>791<br>51 | 5527<br>9123 | 552<br>791<br>51 | + | 1 | 0 | AG01<br>-4           | 0 | 0 | 0 | 1 | 0 | 0 | 0 | 12 |  |
| MIMAT<br>00000<br>93 | hsa-mi<br>R-93-5<br>p  | ENSG00<br>000146<br>648 | EGF<br>R | prote<br>in_co<br>ding | chr7 | 5527<br>7885 | 552<br>778<br>91 | 5527<br>7868 | 552<br>778<br>92 | + | 2 | 0 | AG01<br>-4, A<br>G02 | 0 | 1 | 0 | 0 | 0 | 0 | 1 | 10 |  |
| MIMAT                | hsa-mi                 | ENSG00                  | EGF      | prote                  | chr7 | 5527         | 552              | 5527         | 552              | + | 1 | 0 | AG02                 | 1 | 0 | 0 | 0 | 0 | 0 | 0 | 5  |  |



|              |                 |                 |      |                |      |          |          |          |          |   |   |   |              |   |   |   |   |   |   |   |    |
|--------------|-----------------|-----------------|------|----------------|------|----------|----------|----------|----------|---|---|---|--------------|---|---|---|---|---|---|---|----|
| MIMAT0000242 | hsa-miR-129-5p  | ENSG00000146648 | EGFR | protein_coding | chr7 | 55274488 | 55274493 | 55274466 | 55274494 | + | 2 | 0 | AGO2         | 1 | 0 | 0 | 1 | 0 | 0 | 0 | 5  |
| MIMAT0000243 | hsa-miR-148a-3p | ENSG00000146648 | EGFR | protein_coding | chr7 | 55276357 | 55276362 | 55276357 | 55276362 | + | 1 | 0 | AGO1-4       | 0 | 0 | 1 | 0 | 0 | 0 | 0 | 9  |
| MIMAT0000244 | hsa-miR-30c-5p  | ENSG00000146648 | EGFR | protein_coding | chr7 | 55273438 | 55273443 | 55273438 | 55273443 | + | 5 | 0 | AGO1-4, AGO2 | 1 | 0 | 0 | 0 | 0 | 0 | 0 | 9  |
| MIMAT0000245 | hsa-miR-30d-5p  | ENSG00000146648 | EGFR | protein_coding | chr7 | 55273438 | 55273443 | 55273438 | 55273443 | + | 5 | 0 | AGO1-4, AGO2 | 1 | 0 | 0 | 0 | 0 | 0 | 0 | 8  |
| MIMAT0000251 | hsa-miR-147a    | ENSG00000146648 | EGFR | protein_coding | chr7 | 55274484 | 55274489 | 55274484 | 55274489 | + | 1 | 0 | AGO2         | 1 | 0 | 1 | 0 | 0 | 0 | 0 | 0  |
| MIMAT0000251 | hsa-miR-147a    | ENSG00000146648 | EGFR | protein_coding | chr7 | 55274898 | 55274899 | 55274894 | 55274903 | + | 1 | 0 | AGO1-4       | 3 | 0 | 3 | 0 | 0 | 0 | 0 | 0  |
| MIMAT0000251 | hsa-miR-147a    | ENSG00000146648 | EGFR | protein_coding | chr7 | 55277269 | 55277274 | 55277269 | 55277274 | + | 2 | 0 | AGO1-4, AGO2 | 0 | 0 | 1 | 0 | 0 | 0 | 0 | 0  |
| MIMAT0000252 | hsa-miR-7-5p    | ENSG00000146648 | EGFR | protein_coding | chr7 | 55238402 | 55238407 | 55238402 | 55238407 | + | 2 | 0 | AGO2         | 1 | 0 | 0 | 0 | 0 | 0 | 0 | 11 |
| MIMAT00002   | hsa-miR-7-5p    | ENSG00000146    | EGFR | protein_coding | chr7 | 55273767 | 55273773 | 55273746 | 55273737 | + | 1 | 0 | AGO2         | 1 | 0 | 1 | 1 | 1 | 0 | 1 | 11 |



|                      |                        |                         |          |                        |      |              |                  |              |                  |   |   |   |                      |   |   |   |   |   |   |   |   |
|----------------------|------------------------|-------------------------|----------|------------------------|------|--------------|------------------|--------------|------------------|---|---|---|----------------------|---|---|---|---|---|---|---|---|
| 00002<br>72          | R-215-<br>5p           | 000146<br>648           | R        | in_co<br>ding          |      | 4447         | 744<br>52        | 4447         | 744<br>52        |   |   |   |                      |   |   |   |   |   |   |   |   |
| MIMAT<br>00002<br>75 | hsa-mi<br>R-218-<br>5p | ENSG00<br>000146<br>648 | EGF<br>R | prote<br>in_co<br>ding | chr7 | 5523<br>8419 | 552<br>384<br>39 | 5523<br>8419 | 552<br>384<br>39 | + | 1 | 0 | AG02                 | 0 | 0 | 0 | 0 | 1 | 0 | 0 | 6 |
| MIMAT<br>00002<br>75 | hsa-mi<br>R-218-<br>5p | ENSG00<br>000146<br>648 | EGF<br>R | prote<br>in_co<br>ding | chr7 | 5527<br>3753 | 552<br>737<br>58 | 5527<br>3753 | 552<br>737<br>58 | + | 1 | 0 | AG02                 | 1 | 0 | 1 | 0 | 0 | 0 | 0 | 6 |
| MIMAT<br>00002<br>75 | hsa-mi<br>R-218-<br>5p | ENSG00<br>000146<br>648 | EGF<br>R | prote<br>in_co<br>ding | chr7 | 5527<br>7266 | 552<br>772<br>72 | 5527<br>7266 | 552<br>772<br>72 | + | 2 | 0 | AG01<br>-4, A<br>G02 | 0 | 0 | 1 | 0 | 0 | 0 | 0 | 6 |
| MIMAT<br>00002<br>78 | hsa-mi<br>R-221-<br>3p | ENSG00<br>000146<br>648 | EGF<br>R | prote<br>in_co<br>ding | chr7 | 5527<br>5710 | 552<br>757<br>15 | 5527<br>5710 | 552<br>757<br>15 | + | 2 | 0 | AG02                 | 0 | 0 | 1 | 0 | 0 | 0 | 0 | 6 |
| MIMAT<br>00002<br>79 | hsa-mi<br>R-222-<br>3p | ENSG00<br>000146<br>648 | EGF<br>R | prote<br>in_co<br>ding | chr7 | 5527<br>5710 | 552<br>757<br>15 | 5527<br>5710 | 552<br>757<br>15 | + | 2 | 0 | AG02                 | 0 | 0 | 1 | 0 | 0 | 0 | 0 | 6 |
| MIMAT<br>00002<br>80 | hsa-mi<br>R-223-<br>3p | ENSG00<br>000146<br>648 | EGF<br>R | prote<br>in_co<br>ding | chr7 | 5523<br>8395 | 552<br>384<br>00 | 5523<br>8395 | 552<br>384<br>00 | + | 2 | 0 | AG02                 | 1 | 0 | 0 | 0 | 0 | 0 | 0 | 5 |
| MIMAT<br>00002<br>80 | hsa-mi<br>R-223-<br>3p | ENSG00<br>000146<br>648 | EGF<br>R | prote<br>in_co<br>ding | chr7 | 5527<br>4036 | 552<br>740<br>43 | 5527<br>4036 | 552<br>740<br>43 | + | 5 | 0 | AG01<br>-4, A<br>G02 | 1 | 0 | 0 | 0 | 0 | 0 | 0 | 5 |
| MIMAT<br>00002<br>81 | hsa-mi<br>R-224-<br>5p | ENSG00<br>000146<br>648 | EGF<br>R | prote<br>in_co<br>ding | chr7 | 5527<br>4040 | 552<br>740<br>45 | 5527<br>4040 | 552<br>740<br>45 | + | 5 | 0 | AG01<br>-4, A<br>G02 | 1 | 0 | 1 | 0 | 0 | 0 | 0 | 3 |

|              |                 |                 |      |                |      |          |           |          |           |   |   |   |              |   |   |   |   |   |   |   |   |
|--------------|-----------------|-----------------|------|----------------|------|----------|-----------|----------|-----------|---|---|---|--------------|---|---|---|---|---|---|---|---|
| MIMAT0000281 | hsa-miR-224-5p  | ENSG00000146648 | EGFR | protein_coding | chr7 | 55277911 | 55277917  | 55277911 | 55277917  | + | 3 | 0 | AG01-4, AG02 | 0 | 0 | 1 | 0 | 0 | 0 | 0 | 3 |
| MIMAT0000318 | hsa-miR-200b-3p | ENSG00000146648 | EGFR | protein_coding | chr7 | 55274980 | 55274985  | 55274958 | 55274986  | + | 1 | 0 | AG01-4       | 1 | 0 | 1 | 1 | 0 | 0 | 0 | 5 |
| MIMAT0000318 | hsa-miR-200b-3p | ENSG00000146648 | EGFR | protein_coding | chr7 | 55275726 | 55275731  | 55275704 | 55275732  | + | 2 | 0 | AG02         | 0 | 0 | 1 | 1 | 0 | 0 | 0 | 5 |
| MIMAT0000318 | hsa-miR-200b-3p | ENSG00000146648 | EGFR | protein_coding | chr7 | 55279159 | 55279165  | 55279138 | 55279166  | + | 1 | 0 | AG01-4       | 0 | 0 | 1 | 1 | 0 | 0 | 0 | 5 |
| MIMAT0000318 | hsa-miR-200b-3p | ENSG00000146648 | EGFR | protein_coding | chr7 | 55279237 | 55279242  | 55279215 | 55279243  | + | 1 | 0 | AG01-4       | 0 | 0 | 1 | 1 | 0 | 0 | 0 | 5 |
| MIMAT0000416 | hsa-miR-1-3p    | ENSG00000146648 | EGFR | protein_coding | chr7 | 55273493 | 55273498  | 55273491 | 55273498  | + | 4 | 0 | AG01-4, AG02 | 1 | 0 | 1 | 0 | 0 | 0 | 0 | 3 |
| MIMAT0000416 | hsa-miR-1-3p    | ENSG00000146648 | EGFR | protein_coding | chr7 | 55274056 | 55274061  | 55274034 | 55274062  | + | 5 | 0 | AG01-4, AG02 | 1 | 0 | 1 | 1 | 0 | 0 | 0 | 3 |
| MIMAT0000417 | hsa-miR-15b-5p  | ENSG00000146648 | EGFR | protein_coding | chr7 | 55274319 | 55274324  | 55274319 | 55274324  | + | 4 | 0 | AG01-4, AG02 | 1 | 0 | 1 | 0 | 0 | 0 | 0 | 4 |
| MIMAT0000417 | hsa-miR-27b-1   | ENSG00000146648 | EGFR | protein_coding | chr7 | 55210039 | 552100100 | 55210039 | 552100100 | + | 2 | 0 | AG02         | 0 | 0 | 0 | 1 | 0 | 0 | 0 | 4 |

|                      |                        |                         |          |                        |      |              |                  |              |                  |   |   |   |                      |   |   |   |   |   |   |   |    |  |
|----------------------|------------------------|-------------------------|----------|------------------------|------|--------------|------------------|--------------|------------------|---|---|---|----------------------|---|---|---|---|---|---|---|----|--|
| 19                   | 3p                     | 648                     |          | ding                   |      |              | 67               |              | 67               |   |   |   |                      |   |   |   |   |   |   |   |    |  |
| MIMAT<br>00004<br>19 | hsa-mi<br>R-27b-<br>3p | ENSG00<br>000146<br>648 | EGF<br>R | prote<br>in_co<br>ding | chr7 | 5527<br>3510 | 552<br>735<br>16 | 5527<br>3489 | 552<br>735<br>17 | + | 4 | 0 | AG01<br>-4, A<br>G02 | 1 | 0 | 1 | 1 | 1 | 1 | 0 | 4  |  |
| MIMAT<br>00004<br>19 | hsa-mi<br>R-27b-<br>3p | ENSG00<br>000146<br>648 | EGF<br>R | prote<br>in_co<br>ding | chr7 | 5527<br>5943 | 552<br>759<br>49 | 5527<br>5922 | 552<br>759<br>50 | + | 2 | 0 | AG01<br>-4           | 0 | 0 | 1 | 1 | 0 | 0 | 0 | 4  |  |
| MIMAT<br>00004<br>20 | hsa-mi<br>R-30b-<br>5p | ENSG00<br>000146<br>648 | EGF<br>R | prote<br>in_co<br>ding | chr7 | 5527<br>3438 | 552<br>734<br>43 | 5527<br>3438 | 552<br>734<br>43 | + | 5 | 0 | AG01<br>-4, A<br>G02 | 1 | 0 | 0 | 0 | 0 | 0 | 0 | 10 |  |
| MIMAT<br>00004<br>22 | hsa-mi<br>R-124-<br>3p | ENSG00<br>000146<br>648 | EGF<br>R | prote<br>in_co<br>ding | chr7 | 5527<br>4501 | 552<br>745<br>06 | 5527<br>4501 | 552<br>745<br>06 | + | 1 | 0 | AG02                 | 1 | 0 | 0 | 0 | 0 | 0 | 0 | 4  |  |
| MIMAT<br>00004<br>24 | hsa-mi<br>R-128-<br>3p | ENSG00<br>000146<br>648 | EGF<br>R | prote<br>in_co<br>ding | chr7 | 5521<br>0038 | 552<br>100<br>66 | 5521<br>0038 | 552<br>100<br>66 | + | 2 | 0 | AG02                 | 0 | 0 | 0 | 1 | 0 | 0 | 0 | 11 |  |
| MIMAT<br>00004<br>24 | hsa-mi<br>R-128-<br>3p | ENSG00<br>000146<br>648 | EGF<br>R | prote<br>in_co<br>ding | chr7 | 5527<br>3510 | 552<br>735<br>15 | 5527<br>3488 | 552<br>735<br>16 | + | 4 | 0 | AG01<br>-4, A<br>G02 | 1 | 0 | 0 | 1 | 0 | 1 | 0 | 11 |  |
| MIMAT<br>00004<br>24 | hsa-mi<br>R-128-<br>3p | ENSG00<br>000146<br>648 | EGF<br>R | prote<br>in_co<br>ding | chr7 | 5527<br>5921 | 552<br>759<br>49 | 5527<br>5921 | 552<br>759<br>49 | + | 2 | 0 | AG01<br>-4           | 0 | 0 | 0 | 1 | 0 | 0 | 0 | 11 |  |
| MIMAT<br>00004<br>24 | hsa-mi<br>R-128-<br>3p | ENSG00<br>000146<br>648 | EGF<br>R | prote<br>in_co<br>ding | chr7 | 5527<br>6337 | 552<br>763<br>65 | 5527<br>6337 | 552<br>763<br>65 | + | 1 | 0 | AG01<br>-4           | 0 | 0 | 0 | 1 | 0 | 0 | 0 | 11 |  |
| MIMAT                | hsa-mi                 | ENSG00                  | EGF      | prote                  | chr7 | 5527         | 552              | 5527         | 552              | + | 5 | 0 | AG01                 | 1 | 0 | 1 | 1 | 0 | 0 | 1 | 1  |  |

|                      |                         |                         |          |                        |      |              |                  |              |                  |   |   |   |                      |   |   |   |   |   |   |   |   |    |
|----------------------|-------------------------|-------------------------|----------|------------------------|------|--------------|------------------|--------------|------------------|---|---|---|----------------------|---|---|---|---|---|---|---|---|----|
| 00004<br>27          | R-133a<br>-3p           | 000146<br>648           | R        | in_co<br>ding          |      | 3360         | 733<br>66        | 3339         | 733<br>67        |   |   |   | -4, A<br>G02         |   |   |   |   |   |   |   |   |    |
| MIMAT<br>00004<br>27 | hsa-mi<br>R-133a<br>-3p | ENSG00<br>000146<br>648 | EGF<br>R | prote<br>in_co<br>ding | chr7 | 5527<br>4176 | 552<br>741<br>82 | 5527<br>4155 | 552<br>741<br>83 | + | 5 | 0 | AG01<br>-4, A<br>G02 | 1 | 0 | 1 | 1 | 1 | 0 | 0 | 1 |    |
| MIMAT<br>00004<br>28 | hsa-mi<br>R-135a<br>-5p | ENSG00<br>000146<br>648 | EGF<br>R | prote<br>in_co<br>ding | chr7 | 5527<br>3392 | 552<br>733<br>97 | 5527<br>3392 | 552<br>733<br>97 | + | 4 | 0 | AG01<br>-4, A<br>G02 | 1 | 0 | 0 | 0 | 0 | 0 | 0 | 0 | 10 |
| MIMAT<br>00004<br>28 | hsa-mi<br>R-135a<br>-5p | ENSG00<br>000146<br>648 | EGF<br>R | prote<br>in_co<br>ding | chr7 | 5527<br>4339 | 552<br>743<br>44 | 5527<br>4339 | 552<br>743<br>44 | + | 5 | 0 | AG01<br>-4, A<br>G02 | 1 | 0 | 0 | 0 | 0 | 0 | 0 | 0 | 10 |
| MIMAT<br>00004<br>29 | hsa-mi<br>R-137         | ENSG00<br>000146<br>648 | EGF<br>R | prote<br>in_co<br>ding | chr7 | 5527<br>7873 | 552<br>778<br>79 | 5527<br>7852 | 552<br>778<br>80 | + | 2 | 0 | AG01<br>-4, A<br>G02 | 0 | 0 | 1 | 1 | 0 | 0 | 0 | 1 | 2  |
| MIMAT<br>00004<br>29 | hsa-mi<br>R-137         | ENSG00<br>000146<br>648 | EGF<br>R | prote<br>in_co<br>ding | chr7 | 5527<br>9066 | 552<br>790<br>72 | 5527<br>9045 | 552<br>790<br>73 | + | 1 | 0 | AG01<br>-4           | 0 | 0 | 1 | 1 | 0 | 0 | 0 | 1 | 2  |
| MIMAT<br>00004<br>29 | hsa-mi<br>R-137         | ENSG00<br>000146<br>648 | EGF<br>R | prote<br>in_co<br>ding | chr7 | 5527<br>9094 | 552<br>791<br>00 | 5527<br>9073 | 552<br>791<br>01 | + | 1 | 0 | AG01<br>-4           | 0 | 0 | 1 | 1 | 0 | 0 | 0 | 1 | 2  |
| MIMAT<br>00004<br>30 | hsa-mi<br>R-138-<br>5p  | ENSG00<br>000146<br>648 | EGF<br>R | prote<br>in_co<br>ding | chr7 | 5527<br>7358 | 552<br>773<br>64 | 5527<br>7358 | 552<br>773<br>64 | + | 1 | 0 | AG01<br>-4           | 0 | 0 | 1 | 0 | 0 | 0 | 0 | 0 | 5  |
| MIMAT<br>00004<br>32 | hsa-mi<br>R-141-<br>3p  | ENSG00<br>000146<br>648 | EGF<br>R | prote<br>in_co<br>ding | chr7 | 5522<br>4564 | 552<br>245<br>70 | 5522<br>4547 | 552<br>245<br>71 | + | 1 | 0 | AG02                 | 1 | 0 | 1 | 0 | 1 | 0 | 0 | 0 | 13 |

|                      |                        |                         |          |                        |      |              |                  |              |                  |   |   |   |                      |   |   |   |   |   |   |   |    |
|----------------------|------------------------|-------------------------|----------|------------------------|------|--------------|------------------|--------------|------------------|---|---|---|----------------------|---|---|---|---|---|---|---|----|
| MIMAT<br>00004<br>32 | hsa-mi<br>R-141-<br>3p | ENSG00<br>000146<br>648 | EGF<br>R | prote<br>in_co<br>ding | chr7 | 5527<br>4798 | 552<br>748<br>04 | 5527<br>4777 | 552<br>748<br>05 | + | 3 | 0 | AG01<br>-4, A<br>G02 | 1 | 0 | 1 | 1 | 1 | 0 | 0 | 13 |
| MIMAT<br>00004<br>32 | hsa-mi<br>R-141-<br>3p | ENSG00<br>000146<br>648 | EGF<br>R | prote<br>in_co<br>ding | chr7 | 5527<br>7773 | 552<br>777<br>79 | 5527<br>7752 | 552<br>777<br>80 | + | 1 | 0 | AG01<br>-4           | 0 | 0 | 1 | 1 | 0 | 0 | 0 | 13 |
| MIMAT<br>00004<br>33 | hsa-mi<br>R-142-<br>5p | ENSG00<br>000146<br>648 | EGF<br>R | prote<br>in_co<br>ding | chr7 | 5527<br>9102 | 552<br>791<br>07 | 5527<br>9102 | 552<br>791<br>07 | + | 1 | 0 | AG01<br>-4           | 0 | 0 | 1 | 0 | 0 | 0 | 0 | 10 |
| MIMAT<br>00004<br>35 | hsa-mi<br>R-143-<br>3p | ENSG00<br>000146<br>648 | EGF<br>R | prote<br>in_co<br>ding | chr7 | 5527<br>5495 | 552<br>755<br>01 | 5527<br>5495 | 552<br>755<br>01 | + | 1 | 0 | AG01<br>-4           | 0 | 0 | 1 | 0 | 0 | 0 | 0 | 2  |
| MIMAT<br>00004<br>36 | hsa-mi<br>R-144-<br>3p | ENSG00<br>000146<br>648 | EGF<br>R | prote<br>in_co<br>ding | chr7 | 5527<br>3870 | 552<br>738<br>75 | 5527<br>3848 | 552<br>738<br>76 | + | 2 | 0 | AG02                 | 1 | 0 | 0 | 1 | 0 | 0 | 0 | 2  |
| MIMAT<br>00004<br>36 | hsa-mi<br>R-144-<br>3p | ENSG00<br>000146<br>648 | EGF<br>R | prote<br>in_co<br>ding | chr7 | 5527<br>9204 | 552<br>792<br>10 | 5527<br>9183 | 552<br>792<br>11 | + | 1 | 0 | AG01<br>-4           | 0 | 0 | 0 | 1 | 0 | 0 | 1 | 2  |
| MIMAT<br>00004<br>37 | hsa-mi<br>R-145-<br>5p | ENSG00<br>000146<br>648 | EGF<br>R | prote<br>in_co<br>ding | chr7 | 5522<br>4477 | 552<br>244<br>97 | 5522<br>4477 | 552<br>244<br>97 | + | 1 | 1 | AG01<br>-4           | 0 | 0 | 0 | 0 | 1 | 0 | 0 | 3  |
| MIMAT<br>00004<br>38 | hsa-mi<br>R-152-<br>3p | ENSG00<br>000146<br>648 | EGF<br>R | prote<br>in_co<br>ding | chr7 | 5527<br>6357 | 552<br>763<br>62 | 5527<br>6357 | 552<br>763<br>62 | + | 1 | 0 | AG01<br>-4           | 0 | 0 | 1 | 0 | 0 | 0 | 0 | 4  |
| MIMAT<br>00004       | hsa-mi<br>R-9-3p       | ENSG00<br>000146        | EGF<br>R | prote<br>in_co         | chr7 | 5527<br>9079 | 552<br>791       | 5527<br>9079 | 552<br>791       | + | 1 | 0 | AG01<br>-4           | 0 | 0 | 0 | 1 | 0 | 0 | 0 | 6  |

|                      |                         |                         |          |                        |      |              |                  |              |                  |   |   |   |                      |   |   |   |   |   |   |   |    |  |
|----------------------|-------------------------|-------------------------|----------|------------------------|------|--------------|------------------|--------------|------------------|---|---|---|----------------------|---|---|---|---|---|---|---|----|--|
| 42                   |                         | 648                     |          | ding                   |      |              | 07               |              | 07               |   |   |   |                      |   |   |   |   |   |   |   |    |  |
| MIMAT<br>00004<br>44 | hsa-mi<br>R-126-<br>5p  | ENSG00<br>000146<br>648 | EGF<br>R | prote<br>in_co<br>ding | chr7 | 5527<br>4110 | 552<br>741<br>38 | 5527<br>4110 | 552<br>741<br>38 | + | 3 | 0 | AG01<br>-4, A<br>G02 | 0 | 0 | 0 | 1 | 0 | 0 | 0 | 8  |  |
| MIMAT<br>00004<br>45 | hsa-mi<br>R-126-<br>3p  | ENSG00<br>000146<br>648 | EGF<br>R | prote<br>in_co<br>ding | chr7 | 5527<br>9121 | 552<br>791<br>26 | 5527<br>9121 | 552<br>791<br>26 | + | 1 | 0 | AG01<br>-4           | 0 | 0 | 1 | 0 | 0 | 0 | 0 | 10 |  |
| MIMAT<br>00004<br>47 | hsa-mi<br>R-134-<br>5p  | ENSG00<br>000146<br>648 | EGF<br>R | prote<br>in_co<br>ding | chr7 | 5527<br>4890 | 552<br>748<br>96 | 5527<br>4874 | 552<br>748<br>97 | + | 1 | 0 | AG01<br>-4           | 1 | 0 | 1 | 0 | 1 | 0 | 0 | 4  |  |
| MIMAT<br>00004<br>47 | hsa-mi<br>R-134-<br>5p  | ENSG00<br>000146<br>648 | EGF<br>R | prote<br>in_co<br>ding | chr7 | 5527<br>5395 | 552<br>754<br>01 | 5527<br>5395 | 552<br>754<br>01 | + | 1 | 0 | AG02                 | 0 | 0 | 1 | 0 | 0 | 0 | 0 | 4  |  |
| MIMAT<br>00004<br>47 | hsa-mi<br>R-134-<br>5p  | ENSG00<br>000146<br>648 | EGF<br>R | prote<br>in_co<br>ding | chr7 | 5527<br>5702 | 552<br>757<br>07 | 5527<br>5702 | 552<br>757<br>07 | + | 2 | 0 | AG02                 | 0 | 0 | 1 | 0 | 0 | 0 | 0 | 4  |  |
| MIMAT<br>00004<br>49 | hsa-mi<br>R-146a<br>-5p | ENSG00<br>000146<br>648 | EGF<br>R | prote<br>in_co<br>ding | chr7 | 5527<br>4230 | 552<br>742<br>35 | 5527<br>4208 | 552<br>742<br>36 | + | 4 | 0 | AG01<br>-4, A<br>G02 | 1 | 0 | 1 | 1 | 0 | 0 | 0 | 10 |  |
| MIMAT<br>00004<br>49 | hsa-mi<br>R-146a<br>-5p | ENSG00<br>000146<br>648 | EGF<br>R | prote<br>in_co<br>ding | chr7 | 5527<br>5861 | 552<br>758<br>67 | 5527<br>5840 | 552<br>758<br>68 | + | 1 | 0 | AG02                 | 0 | 0 | 1 | 1 | 0 | 0 | 0 | 10 |  |
| MIMAT<br>00004<br>50 | hsa-mi<br>R-149-<br>5p  | ENSG00<br>000146<br>648 | EGF<br>R | prote<br>in_co<br>ding | chr7 | 5523<br>8552 | 552<br>385<br>58 | 5523<br>8537 | 552<br>385<br>59 | + | 2 | 0 | AG02                 | 1 | 0 | 1 | 0 | 1 | 0 | 0 | 7  |  |
| MIMAT                | hsa-mi                  | ENSG00                  | EGF      | prote                  | chr7 | 5527         | 552              | 5527         | 552              | + | 5 | 0 | AG01                 | 1 | 0 | 0 | 0 | 0 | 0 | 0 | 7  |  |

|                      |                         |                         |          |                        |      |              |                  |              |                  |   |   |   |                      |   |   |   |   |   |   |   |    |
|----------------------|-------------------------|-------------------------|----------|------------------------|------|--------------|------------------|--------------|------------------|---|---|---|----------------------|---|---|---|---|---|---|---|----|
| 00004<br>50          | R-149-<br>5p            | 000146<br>648           | R        | in_co<br>ding          |      | 3451         | 734<br>56        | 3451         | 734<br>56        |   |   |   | -4, A<br>G02         |   |   |   |   |   |   |   |    |
| MIMAT<br>00004<br>52 | hsa-mi<br>R-154-<br>5p  | ENSG00<br>000146<br>648 | EGF<br>R | prote<br>in_co<br>ding | chr7 | 5527<br>4765 | 552<br>747<br>70 | 5527<br>4765 | 552<br>747<br>70 | + | 1 | 0 | AG02                 | 1 | 0 | 0 | 0 | 0 | 0 | 0 | 3  |
| MIMAT<br>00004<br>55 | hsa-mi<br>R-185-<br>5p  | ENSG00<br>000146<br>648 | EGF<br>R | prote<br>in_co<br>ding | chr7 | 5522<br>4249 | 552<br>242<br>70 | 5522<br>4249 | 552<br>242<br>70 | + | 2 | 0 | AG01<br>-4           | 0 | 0 | 0 | 0 | 1 | 0 | 0 | 12 |
| MIMAT<br>00004<br>55 | hsa-mi<br>R-185-<br>5p  | ENSG00<br>000146<br>648 | EGF<br>R | prote<br>in_co<br>ding | chr7 | 5527<br>4810 | 552<br>748<br>15 | 5527<br>4810 | 552<br>748<br>15 | + | 2 | 0 | AG01<br>-4, A<br>G02 | 1 | 0 | 0 | 0 | 0 | 0 | 0 | 12 |
| MIMAT<br>00004<br>56 | hsa-mi<br>R-186-<br>5p  | ENSG00<br>000146<br>648 | EGF<br>R | prote<br>in_co<br>ding | chr7 | 5527<br>9248 | 552<br>792<br>76 | 5527<br>9248 | 552<br>792<br>76 | + | 1 | 0 | AG01<br>-4           | 0 | 0 | 0 | 1 | 0 | 0 | 0 | 17 |
| MIMAT<br>00004<br>59 | hsa-mi<br>R-193a<br>-3p | ENSG00<br>000146<br>648 | EGF<br>R | prote<br>in_co<br>ding | chr7 | 5523<br>8350 | 552<br>383<br>55 | 5523<br>8350 | 552<br>383<br>55 | + | 2 | 0 | AG02                 | 1 | 0 | 0 | 0 | 0 | 0 | 0 | 3  |
| MIMAT<br>00004<br>60 | hsa-mi<br>R-194-<br>5p  | ENSG00<br>000146<br>648 | EGF<br>R | prote<br>in_co<br>ding | chr7 | 5527<br>4371 | 552<br>743<br>76 | 5527<br>4371 | 552<br>743<br>76 | + | 4 | 0 | AG01<br>-4, A<br>G02 | 1 | 0 | 1 | 0 | 0 | 0 | 0 | 9  |
| MIMAT<br>00004<br>60 | hsa-mi<br>R-194-<br>5p  | ENSG00<br>000146<br>648 | EGF<br>R | prote<br>in_co<br>ding | chr7 | 5527<br>7799 | 552<br>778<br>04 | 5527<br>7799 | 552<br>778<br>04 | + | 1 | 0 | AG01<br>-4           | 0 | 0 | 1 | 0 | 0 | 0 | 0 | 9  |
| MIMAT<br>00004<br>61 | hsa-mi<br>R-195-<br>5p  | ENSG00<br>000146<br>648 | EGF<br>R | prote<br>in_co<br>ding | chr7 | 5527<br>4319 | 552<br>743<br>24 | 5527<br>4319 | 552<br>743<br>24 | + | 4 | 0 | AG01<br>-4, A<br>G02 | 1 | 0 | 1 | 0 | 0 | 0 | 0 | 1  |

|                      |                         |                         |          |                        |      |              |                  |              |                  |   |   |   |                      |   |   |   |   |   |   |   |   |
|----------------------|-------------------------|-------------------------|----------|------------------------|------|--------------|------------------|--------------|------------------|---|---|---|----------------------|---|---|---|---|---|---|---|---|
| MIMAT<br>00004<br>62 | hsa-mi<br>R-206         | ENSG00<br>000146<br>648 | EGF<br>R | prote<br>in_co<br>ding | chr7 | 5527<br>3493 | 552<br>734<br>98 | 5527<br>3491 | 552<br>734<br>98 | + | 4 | 0 | AG01<br>-4, A<br>G02 | 1 | 0 | 1 | 0 | 0 | 0 | 0 | 2 |
| MIMAT<br>00004<br>62 | hsa-mi<br>R-206         | ENSG00<br>000146<br>648 | EGF<br>R | prote<br>in_co<br>ding | chr7 | 5527<br>4056 | 552<br>740<br>61 | 5527<br>4034 | 552<br>740<br>62 | + | 5 | 0 | AG01<br>-4, A<br>G02 | 1 | 0 | 1 | 1 | 0 | 0 | 0 | 2 |
| MIMAT<br>00005<br>10 | hsa-mi<br>R-320a        | ENSG00<br>000146<br>648 | EGF<br>R | prote<br>in_co<br>ding | chr7 | 5522<br>1790 | 552<br>218<br>18 | 5522<br>1790 | 552<br>218<br>18 | + | 2 | 0 | AG01<br>-4, A<br>G02 | 0 | 0 | 0 | 1 | 0 | 0 | 0 | 7 |
| MIMAT<br>00005<br>10 | hsa-mi<br>R-320a        | ENSG00<br>000146<br>648 | EGF<br>R | prote<br>in_co<br>ding | chr7 | 5527<br>4415 | 552<br>744<br>20 | 5527<br>4393 | 552<br>744<br>21 | + | 6 | 0 | AG01<br>-4, A<br>G02 | 1 | 0 | 0 | 1 | 0 | 0 | 0 | 7 |
| MIMAT<br>00005<br>10 | hsa-mi<br>R-320a        | ENSG00<br>000146<br>648 | EGF<br>R | prote<br>in_co<br>ding | chr7 | 5527<br>7366 | 552<br>773<br>94 | 5527<br>7366 | 552<br>773<br>94 | + | 1 | 0 | AG01<br>-4           | 0 | 0 | 0 | 1 | 0 | 0 | 0 | 7 |
| MIMAT<br>00005<br>10 | hsa-mi<br>R-320a        | ENSG00<br>000146<br>648 | EGF<br>R | prote<br>in_co<br>ding | chr7 | 5527<br>9078 | 552<br>791<br>06 | 5527<br>9078 | 552<br>791<br>06 | + | 1 | 0 | AG01<br>-4           | 0 | 0 | 0 | 1 | 0 | 0 | 0 | 7 |
| MIMAT<br>00006<br>17 | hsa-mi<br>R-200c<br>-3p | ENSG00<br>000146<br>648 | EGF<br>R | prote<br>in_co<br>ding | chr7 | 5527<br>4980 | 552<br>749<br>85 | 5527<br>4958 | 552<br>749<br>86 | + | 1 | 0 | AG01<br>-4           | 1 | 0 | 1 | 1 | 0 | 0 | 0 | 8 |
| MIMAT<br>00006<br>17 | hsa-mi<br>R-200c<br>-3p | ENSG00<br>000146<br>648 | EGF<br>R | prote<br>in_co<br>ding | chr7 | 5527<br>5726 | 552<br>757<br>31 | 5527<br>5704 | 552<br>757<br>32 | + | 2 | 0 | AG02                 | 0 | 0 | 1 | 1 | 0 | 0 | 0 | 8 |
| MIMAT<br>00006       | hsa-mi<br>R-200c        | ENSG00<br>000146        | EGF<br>R | prote<br>in_co         | chr7 | 5527<br>9159 | 552<br>791       | 5527<br>9138 | 552<br>791       | + | 1 | 0 | AG01<br>-4           | 0 | 0 | 1 | 1 | 0 | 0 | 0 | 8 |

|                      |                         |                         |          |                        |      |              |                  |              |                  |   |   |   |                      |   |   |   |   |   |   |   |   |    |
|----------------------|-------------------------|-------------------------|----------|------------------------|------|--------------|------------------|--------------|------------------|---|---|---|----------------------|---|---|---|---|---|---|---|---|----|
| 17                   | -3p                     | 648                     |          | ding                   |      |              | 65               |              | 66               |   |   |   |                      |   |   |   |   |   |   |   |   |    |
| MIMAT<br>00006<br>17 | hsa-mi<br>R-200c<br>-3p | ENSG00<br>000146<br>648 | EGF<br>R | prote<br>in_co<br>ding | chr7 | 5527<br>9237 | 552<br>792<br>42 | 5527<br>9215 | 552<br>792<br>43 | + | 1 | 0 | AG01<br>-4           | 0 | 0 | 1 | 1 | 0 | 0 | 0 | 0 | 8  |
| MIMAT<br>00006<br>46 | hsa-mi<br>R-155-<br>5p  | ENSG00<br>000146<br>648 | EGF<br>R | prote<br>in_co<br>ding | chr7 | 5527<br>3402 | 552<br>734<br>07 | 5527<br>3402 | 552<br>734<br>07 | + | 6 | 0 | AG01<br>-4, A<br>G02 | 1 | 0 | 1 | 0 | 0 | 0 | 0 | 0 | 6  |
| MIMAT<br>00006<br>46 | hsa-mi<br>R-155-<br>5p  | ENSG00<br>000146<br>648 | EGF<br>R | prote<br>in_co<br>ding | chr7 | 5527<br>4573 | 552<br>745<br>79 | 5527<br>4559 | 552<br>745<br>80 | + | 1 | 0 | AG02                 | 1 | 0 | 1 | 0 | 1 | 0 | 0 | 0 | 6  |
| MIMAT<br>00006<br>46 | hsa-mi<br>R-155-<br>5p  | ENSG00<br>000146<br>648 | EGF<br>R | prote<br>in_co<br>ding | chr7 | 5527<br>5713 | 552<br>757<br>19 | 5527<br>5713 | 552<br>757<br>19 | + | 2 | 0 | AG02                 | 0 | 0 | 1 | 0 | 0 | 0 | 0 | 0 | 6  |
| MIMAT<br>00006<br>80 | hsa-mi<br>R-106b<br>-5p | ENSG00<br>000146<br>648 | EGF<br>R | prote<br>in_co<br>ding | chr7 | 5527<br>7885 | 552<br>778<br>91 | 5527<br>7870 | 552<br>778<br>92 | + | 2 | 0 | AG01<br>-4, A<br>G02 | 0 | 1 | 0 | 0 | 0 | 0 | 0 | 1 | 11 |
| MIMAT<br>00006<br>82 | hsa-mi<br>R-200a<br>-3p | ENSG00<br>000146<br>648 | EGF<br>R | prote<br>in_co<br>ding | chr7 | 5522<br>4564 | 552<br>245<br>70 | 5522<br>4550 | 552<br>245<br>71 | + | 1 | 0 | AG02                 | 1 | 0 | 1 | 0 | 1 | 0 | 0 | 0 | 11 |
| MIMAT<br>00006<br>82 | hsa-mi<br>R-200a<br>-3p | ENSG00<br>000146<br>648 | EGF<br>R | prote<br>in_co<br>ding | chr7 | 5527<br>4798 | 552<br>748<br>04 | 5527<br>4777 | 552<br>748<br>05 | + | 3 | 0 | AG01<br>-4, A<br>G02 | 1 | 0 | 1 | 1 | 1 | 0 | 0 | 0 | 11 |
| MIMAT<br>00006<br>82 | hsa-mi<br>R-200a<br>-3p | ENSG00<br>000146<br>648 | EGF<br>R | prote<br>in_co<br>ding | chr7 | 5527<br>7773 | 552<br>777<br>79 | 5527<br>7752 | 552<br>777<br>80 | + | 1 | 0 | AG01<br>-4           | 0 | 0 | 1 | 1 | 0 | 0 | 0 | 0 | 11 |
| MIMAT                | hsa-mi                  | ENSG00                  | EGF      | prote                  | chr7 | 5527         | 552              | 5527         | 552              | + | 1 | 2 | AG02                 | 1 | 0 | 1 | 1 | 1 | 0 | 0 | 0 | 6  |

|                      |                         |                         |          |                        |      |              |                  |              |                  |   |   |   |                      |   |   |   |   |   |   |   |    |  |
|----------------------|-------------------------|-------------------------|----------|------------------------|------|--------------|------------------|--------------|------------------|---|---|---|----------------------|---|---|---|---|---|---|---|----|--|
| 00006<br>84          | R-302a<br>-3p           | 000146<br>648           | R        | in_co<br>ding          |      | 4521         | 745<br>27        | 4500         | 745<br>28        |   |   |   |                      |   |   |   |   |   |   |   |    |  |
| MIMAT<br>00006<br>84 | hsa-mi<br>R-302a<br>-3p | ENSG00<br>000146<br>648 | EGF<br>R | prote<br>in_co<br>ding | chr7 | 5527<br>7884 | 552<br>778<br>90 | 5527<br>7863 | 552<br>778<br>91 | + | 2 | 0 | AG01<br>-4, A<br>G02 | 0 | 0 | 1 | 1 | 0 | 0 | 1 | 6  |  |
| MIMAT<br>00006<br>87 | hsa-mi<br>R-299-<br>3p  | ENSG00<br>000146<br>648 | EGF<br>R | prote<br>in_co<br>ding | chr7 | 5527<br>4152 | 552<br>741<br>58 | 5527<br>4139 | 552<br>741<br>59 | + | 2 | 0 | AG01<br>-4           | 1 | 0 | 0 | 0 | 1 | 0 | 0 | 2  |  |
| MIMAT<br>00006<br>92 | hsa-mi<br>R-30e-<br>5p  | ENSG00<br>000146<br>648 | EGF<br>R | prote<br>in_co<br>ding | chr7 | 5527<br>3438 | 552<br>734<br>43 | 5527<br>3438 | 552<br>734<br>43 | + | 5 | 0 | AG01<br>-4, A<br>G02 | 1 | 0 | 0 | 0 | 0 | 0 | 0 | 12 |  |
| MIMAT<br>00007<br>05 | hsa-mi<br>R-362-<br>5p  | ENSG00<br>000146<br>648 | EGF<br>R | prote<br>in_co<br>ding | chr7 | 5527<br>4210 | 552<br>742<br>17 | 5527<br>4210 | 552<br>742<br>17 | + | 4 | 0 | AG01<br>-4, A<br>G02 | 1 | 0 | 0 | 0 | 0 | 0 | 0 | 16 |  |
| MIMAT<br>00007<br>15 | hsa-mi<br>R-302b<br>-3p | ENSG00<br>000146<br>648 | EGF<br>R | prote<br>in_co<br>ding | chr7 | 5527<br>4521 | 552<br>745<br>27 | 5527<br>4500 | 552<br>745<br>28 | + | 1 | 2 | AG02                 | 1 | 0 | 1 | 1 | 1 | 0 | 0 | 4  |  |
| MIMAT<br>00007<br>15 | hsa-mi<br>R-302b<br>-3p | ENSG00<br>000146<br>648 | EGF<br>R | prote<br>in_co<br>ding | chr7 | 5527<br>7884 | 552<br>778<br>90 | 5527<br>7863 | 552<br>778<br>91 | + | 2 | 0 | AG01<br>-4, A<br>G02 | 0 | 0 | 1 | 1 | 0 | 0 | 1 | 4  |  |
| MIMAT<br>00007<br>17 | hsa-mi<br>R-302c<br>-3p | ENSG00<br>000146<br>648 | EGF<br>R | prote<br>in_co<br>ding | chr7 | 5527<br>4521 | 552<br>745<br>27 | 5527<br>4500 | 552<br>745<br>28 | + | 1 | 2 | AG02                 | 1 | 0 | 1 | 1 | 1 | 0 | 0 | 2  |  |
| MIMAT<br>00007<br>17 | hsa-mi<br>R-302c<br>-3p | ENSG00<br>000146<br>648 | EGF<br>R | prote<br>in_co<br>ding | chr7 | 5527<br>7884 | 552<br>778<br>90 | 5527<br>7863 | 552<br>778<br>91 | + | 2 | 0 | AG01<br>-4, A<br>G02 | 0 | 0 | 1 | 1 | 0 | 0 | 1 | 2  |  |

|                      |                         |                         |          |                        |      |              |                  |              |                  |   |   |   |                      |   |   |   |   |   |   |   |   |
|----------------------|-------------------------|-------------------------|----------|------------------------|------|--------------|------------------|--------------|------------------|---|---|---|----------------------|---|---|---|---|---|---|---|---|
| MIMAT<br>00007<br>18 | hsa-mi<br>R-302d<br>-3p | ENSG00<br>000146<br>648 | EGF<br>R | prote<br>in_co<br>ding | chr7 | 5527<br>4521 | 552<br>745<br>27 | 5527<br>4500 | 552<br>745<br>28 | + | 1 | 2 | AG02                 | 1 | 0 | 1 | 1 | 1 | 0 | 0 | 4 |
| MIMAT<br>00007<br>18 | hsa-mi<br>R-302d<br>-3p | ENSG00<br>000146<br>648 | EGF<br>R | prote<br>in_co<br>ding | chr7 | 5527<br>7884 | 552<br>778<br>90 | 5527<br>7863 | 552<br>778<br>91 | + | 2 | 0 | AG01<br>-4, A<br>G02 | 0 | 0 | 1 | 1 | 0 | 0 | 1 | 4 |
| MIMAT<br>00007<br>22 | hsa-mi<br>R-370-<br>3p  | ENSG00<br>000146<br>648 | EGF<br>R | prote<br>in_co<br>ding | chr7 | 5527<br>3371 | 552<br>733<br>77 | 5527<br>3356 | 552<br>733<br>78 | + | 5 | 0 | AG01<br>-4, A<br>G02 | 1 | 0 | 1 | 0 | 1 | 0 | 0 | 2 |
| MIMAT<br>00007<br>22 | hsa-mi<br>R-370-<br>3p  | ENSG00<br>000146<br>648 | EGF<br>R | prote<br>in_co<br>ding | chr7 | 5527<br>3854 | 552<br>738<br>60 | 5527<br>3853 | 552<br>738<br>60 | + | 2 | 0 | AG02                 | 1 | 0 | 1 | 0 | 0 | 0 | 0 | 2 |
| MIMAT<br>00007<br>24 | hsa-mi<br>R-372-<br>3p  | ENSG00<br>000146<br>648 | EGF<br>R | prote<br>in_co<br>ding | chr7 | 5527<br>4521 | 552<br>745<br>27 | 5527<br>4506 | 552<br>745<br>28 | + | 1 | 2 | AG02                 | 1 | 0 | 1 | 0 | 1 | 0 | 0 | 4 |
| MIMAT<br>00007<br>24 | hsa-mi<br>R-372-<br>3p  | ENSG00<br>000146<br>648 | EGF<br>R | prote<br>in_co<br>ding | chr7 | 5527<br>7884 | 552<br>778<br>90 | 5527<br>7884 | 552<br>778<br>90 | + | 2 | 0 | AG01<br>-4, A<br>G02 | 0 | 0 | 1 | 0 | 0 | 0 | 1 | 4 |
| MIMAT<br>00007<br>26 | hsa-mi<br>R-373-<br>3p  | ENSG00<br>000146<br>648 | EGF<br>R | prote<br>in_co<br>ding | chr7 | 5527<br>4521 | 552<br>745<br>27 | 5527<br>4500 | 552<br>745<br>28 | + | 1 | 2 | AG02                 | 1 | 0 | 1 | 1 | 1 | 0 | 0 | 3 |
| MIMAT<br>00007<br>26 | hsa-mi<br>R-373-<br>3p  | ENSG00<br>000146<br>648 | EGF<br>R | prote<br>in_co<br>ding | chr7 | 5527<br>7884 | 552<br>778<br>90 | 5527<br>7863 | 552<br>778<br>91 | + | 2 | 0 | AG01<br>-4, A<br>G02 | 0 | 0 | 1 | 1 | 0 | 0 | 1 | 3 |
| MIMAT<br>00007       | hsa-mi<br>R-330-        | ENSG00<br>000146        | EGF<br>R | prote<br>in_co         | chr7 | 5527<br>4477 | 552<br>744       | 5527<br>4477 | 552<br>744       | + | 1 | 0 | AG02                 | 1 | 0 | 0 | 0 | 0 | 0 | 0 | 5 |

|                      |                         |                         |          |                        |      |              |                  |              |                  |   |   |   |                      |   |   |   |   |   |   |   |   |    |
|----------------------|-------------------------|-------------------------|----------|------------------------|------|--------------|------------------|--------------|------------------|---|---|---|----------------------|---|---|---|---|---|---|---|---|----|
| 51                   | 3p                      | 648                     |          | ding                   |      |              | 82               |              | 82               |   |   |   |                      |   |   |   |   |   |   |   |   |    |
| MIMAT<br>00007<br>53 | hsa-mi<br>R-342-<br>3p  | ENSG00<br>000146<br>648 | EGF<br>R | prote<br>in_co<br>ding | chr7 | 5527<br>6333 | 552<br>763<br>38 | 5527<br>6333 | 552<br>763<br>38 | + | 1 | 0 | AG01<br>-4           | 0 | 0 | 1 | 0 | 0 | 0 | 0 | 0 | 10 |
| MIMAT<br>00007<br>55 | hsa-mi<br>R-323a<br>-3p | ENSG00<br>000146<br>648 | EGF<br>R | prote<br>in_co<br>ding | chr7 | 5527<br>7907 | 552<br>779<br>12 | 5527<br>7907 | 552<br>779<br>12 | + | 3 | 0 | AG01<br>-4, A<br>G02 | 0 | 0 | 1 | 0 | 0 | 0 | 0 | 0 | 4  |
| MIMAT<br>00007<br>56 | hsa-mi<br>R-326         | ENSG00<br>000146<br>648 | EGF<br>R | prote<br>in_co<br>ding | chr7 | 5527<br>3772 | 552<br>737<br>77 | 5527<br>3772 | 552<br>737<br>77 | + | 1 | 0 | AG02                 | 1 | 0 | 0 | 0 | 0 | 0 | 0 | 0 | 3  |
| MIMAT<br>00007<br>58 | hsa-mi<br>R-135b<br>-5p | ENSG00<br>000146<br>648 | EGF<br>R | prote<br>in_co<br>ding | chr7 | 5527<br>3392 | 552<br>733<br>97 | 5527<br>3392 | 552<br>733<br>97 | + | 4 | 0 | AG01<br>-4, A<br>G02 | 1 | 0 | 0 | 0 | 0 | 0 | 0 | 0 | 8  |
| MIMAT<br>00007<br>58 | hsa-mi<br>R-135b<br>-5p | ENSG00<br>000146<br>648 | EGF<br>R | prote<br>in_co<br>ding | chr7 | 5527<br>4339 | 552<br>743<br>44 | 5527<br>4339 | 552<br>743<br>44 | + | 5 | 0 | AG01<br>-4, A<br>G02 | 1 | 0 | 0 | 0 | 0 | 0 | 0 | 0 | 8  |
| MIMAT<br>00007<br>59 | hsa-mi<br>R-148b<br>-3p | ENSG00<br>000146<br>648 | EGF<br>R | prote<br>in_co<br>ding | chr7 | 5527<br>6357 | 552<br>763<br>62 | 5527<br>6357 | 552<br>763<br>62 | + | 1 | 0 | AG01<br>-4           | 0 | 0 | 1 | 0 | 0 | 0 | 0 | 0 | 16 |
| MIMAT<br>00007<br>60 | hsa-mi<br>R-331-<br>3p  | ENSG00<br>000146<br>648 | EGF<br>R | prote<br>in_co<br>ding | chr7 | 5527<br>5326 | 552<br>753<br>31 | 5527<br>5326 | 552<br>753<br>31 | + | 1 | 0 | AG02                 | 0 | 0 | 1 | 0 | 0 | 0 | 0 | 0 | 7  |
| MIMAT<br>00007<br>60 | hsa-mi<br>R-331-<br>3p  | ENSG00<br>000146<br>648 | EGF<br>R | prote<br>in_co<br>ding | chr7 | 5527<br>7378 | 552<br>773<br>84 | 5527<br>7378 | 552<br>773<br>84 | + | 1 | 0 | AG01<br>-4           | 0 | 0 | 1 | 0 | 0 | 0 | 0 | 0 | 7  |
| MIMAT                | hsa-mi                  | ENSG00                  | EGF      | prote                  | chr7 | 5527         | 552              | 5527         | 552              | + | 1 | 0 | AG02                 | 1 | 0 | 1 | 0 | 0 | 0 | 0 | 0 | 15 |

|                      |                        |                         |          |                        |      |              |                  |              |                  |   |   |   |                      |   |   |   |   |   |   |   |    |
|----------------------|------------------------|-------------------------|----------|------------------------|------|--------------|------------------|--------------|------------------|---|---|---|----------------------|---|---|---|---|---|---|---|----|
| 00007<br>61          | R-324-<br>5p           | 000146<br>648           | R        | in_co<br>ding          |      | 3777         | 737<br>82        | 3777         | 737<br>82        |   |   |   |                      |   |   |   |   |   |   |   |    |
| MIMAT<br>00007<br>61 | hsa-mi<br>R-324-<br>5p | ENSG00<br>000146<br>648 | EGF<br>R | prote<br>in_co<br>ding | chr7 | 5527<br>6364 | 552<br>763<br>69 | 5527<br>6364 | 552<br>763<br>69 | + | 1 | 0 | AG01<br>-4           | 0 | 0 | 1 | 0 | 0 | 0 | 0 | 15 |
| MIMAT<br>00007<br>62 | hsa-mi<br>R-324-<br>3p | ENSG00<br>000146<br>648 | EGF<br>R | prote<br>in_co<br>ding | chr7 | 5527<br>5951 | 552<br>759<br>56 | 5527<br>5951 | 552<br>759<br>56 | + | 2 | 0 | AG01<br>-4           | 0 | 0 | 1 | 0 | 0 | 0 | 0 | 12 |
| MIMAT<br>00007<br>62 | hsa-mi<br>R-324-<br>3p | ENSG00<br>000146<br>648 | EGF<br>R | prote<br>in_co<br>ding | chr7 | 5527<br>7769 | 552<br>777<br>75 | 5527<br>7769 | 552<br>777<br>75 | + | 1 | 0 | AG01<br>-4           | 0 | 0 | 1 | 0 | 0 | 0 | 0 | 12 |
| MIMAT<br>00007<br>63 | hsa-mi<br>R-338-<br>3p | ENSG00<br>000146<br>648 | EGF<br>R | prote<br>in_co<br>ding | chr7 | 5524<br>1688 | 552<br>417<br>08 | 5524<br>1688 | 552<br>417<br>08 | + | 2 | 0 | AG01<br>-4, A<br>G02 | 0 | 1 | 0 | 0 | 0 | 0 | 0 | 12 |
| MIMAT<br>00007<br>70 | hsa-mi<br>R-133b       | ENSG00<br>000146<br>648 | EGF<br>R | prote<br>in_co<br>ding | chr7 | 5527<br>3360 | 552<br>733<br>66 | 5527<br>3339 | 552<br>733<br>67 | + | 5 | 0 | AG01<br>-4, A<br>G02 | 1 | 0 | 1 | 1 | 0 | 0 | 1 | 3  |
| MIMAT<br>00007<br>70 | hsa-mi<br>R-133b       | ENSG00<br>000146<br>648 | EGF<br>R | prote<br>in_co<br>ding | chr7 | 5527<br>4176 | 552<br>741<br>82 | 5527<br>4155 | 552<br>741<br>83 | + | 5 | 0 | AG01<br>-4, A<br>G02 | 1 | 0 | 1 | 1 | 1 | 0 | 0 | 3  |
| MIMAT<br>00007<br>72 | hsa-mi<br>R-345-<br>5p | ENSG00<br>000146<br>648 | EGF<br>R | prote<br>in_co<br>ding | chr7 | 5527<br>4951 | 552<br>749<br>56 | 5527<br>4951 | 552<br>749<br>56 | + | 1 | 0 | AG01<br>-4           | 1 | 0 | 1 | 0 | 0 | 0 | 0 | 11 |
| MIMAT<br>00007<br>72 | hsa-mi<br>R-345-<br>5p | ENSG00<br>000146<br>648 | EGF<br>R | prote<br>in_co<br>ding | chr7 | 5527<br>5612 | 552<br>756<br>17 | 5527<br>5612 | 552<br>756<br>17 | + | 2 | 0 | AG01<br>-4           | 0 | 0 | 1 | 0 | 0 | 0 | 0 | 11 |

|              |                |                 |      |                |      |          |          |          |          |   |   |   |              |   |   |   |   |   |   |   |    |
|--------------|----------------|-----------------|------|----------------|------|----------|----------|----------|----------|---|---|---|--------------|---|---|---|---|---|---|---|----|
| MIMAT000072  | hsa-miR-345-5p | ENSG00000146648 | EGFR | protein_coding | chr7 | 55276010 | 55276015 | 55276010 | 55276015 | + | 2 | 0 | AG01-4       | 0 | 0 | 1 | 0 | 0 | 0 | 0 | 11 |
| MIMAT000072  | hsa-miR-345-5p | ENSG00000146648 | EGFR | protein_coding | chr7 | 55276112 | 55276117 | 55276112 | 55276117 | + | 1 | 0 | AG01-4       | 0 | 0 | 1 | 0 | 0 | 0 | 0 | 11 |
| MIMAT0001341 | hsa-miR-424-5p | ENSG00000146648 | EGFR | protein_coding | chr7 | 55240702 | 55240730 | 55240702 | 55240730 | + | 2 | 0 | AG01-4, AG02 | 0 | 0 | 0 | 1 | 0 | 0 | 0 | 6  |
| MIMAT0001341 | hsa-miR-424-5p | ENSG00000146648 | EGFR | protein_coding | chr7 | 55274319 | 55274324 | 55274297 | 55274325 | + | 4 | 2 | AG01-4, AG02 | 1 | 0 | 1 | 1 | 0 | 0 | 0 | 6  |
| MIMAT0001413 | hsa-miR-20b-5p | ENSG00000146648 | EGFR | protein_coding | chr7 | 55277885 | 55277891 | 55277868 | 55277892 | + | 2 | 0 | AG01-4, AG02 | 0 | 1 | 0 | 0 | 0 | 0 | 1 | 9  |
| MIMAT0001536 | hsa-miR-429    | ENSG00000146648 | EGFR | protein_coding | chr7 | 55274980 | 55274985 | 55274958 | 55274986 | + | 1 | 0 | AG01-4       | 1 | 0 | 1 | 1 | 0 | 0 | 0 | 7  |
| MIMAT0001536 | hsa-miR-429    | ENSG00000146648 | EGFR | protein_coding | chr7 | 55275726 | 55275731 | 55275704 | 55275732 | + | 2 | 0 | AG02         | 0 | 0 | 1 | 1 | 0 | 0 | 0 | 7  |
| MIMAT0001536 | hsa-miR-429    | ENSG00000146648 | EGFR | protein_coding | chr7 | 55279159 | 55279165 | 55279138 | 55279166 | + | 1 | 0 | AG01-4       | 0 | 0 | 1 | 1 | 0 | 0 | 0 | 7  |
| MIMAT0001536 | hsa-miR-429    | ENSG00000146648 | EGFR | protein_coding | chr7 | 55279237 | 55279279 | 55279215 | 55279272 | + | 1 | 0 | AG01-4       | 0 | 0 | 1 | 1 | 0 | 0 | 0 | 7  |

|                      |                         |                         |          |                        |      |              |                  |              |                  |   |   |   |                      |   |   |   |   |   |   |   |   |   |
|----------------------|-------------------------|-------------------------|----------|------------------------|------|--------------|------------------|--------------|------------------|---|---|---|----------------------|---|---|---|---|---|---|---|---|---|
| 36                   |                         | 648                     |          | ding                   |      |              | 42               |              | 43               |   |   |   |                      |   |   |   |   |   |   |   |   |   |
| MIMAT<br>00015<br>45 | hsa-mi<br>R-450a<br>-5p | ENSG00<br>000146<br>648 | EGF<br>R | prote<br>in_co<br>ding | chr7 | 5527<br>4234 | 552<br>742<br>40 | 5527<br>4220 | 552<br>742<br>41 | + | 5 | 0 | AG01<br>-4, A<br>G02 | 1 | 0 | 0 | 0 | 1 | 0 | 0 | 0 | 7 |
| MIMAT<br>00016<br>27 | hsa-mi<br>R-433-<br>3p  | ENSG00<br>000146<br>648 | EGF<br>R | prote<br>in_co<br>ding | chr7 | 5527<br>4025 | 552<br>740<br>30 | 5527<br>4025 | 552<br>740<br>30 | + | 5 | 0 | AG01<br>-4, A<br>G02 | 1 | 0 | 1 | 0 | 0 | 0 | 0 | 0 | 3 |
| MIMAT<br>00016<br>27 | hsa-mi<br>R-433-<br>3p  | ENSG00<br>000146<br>648 | EGF<br>R | prote<br>in_co<br>ding | chr7 | 5527<br>4100 | 552<br>741<br>05 | 5527<br>4100 | 552<br>741<br>05 | + | 4 | 0 | AG01<br>-4, A<br>G02 | 1 | 0 | 1 | 0 | 0 | 0 | 0 | 0 | 3 |
| MIMAT<br>00016<br>29 | hsa-mi<br>R-329-<br>3p  | ENSG00<br>000146<br>648 | EGF<br>R | prote<br>in_co<br>ding | chr7 | 5527<br>4753 | 552<br>747<br>58 | 5527<br>4753 | 552<br>747<br>58 | + | 1 | 0 | AG02                 | 1 | 0 | 0 | 0 | 0 | 0 | 0 | 0 | 1 |
| MIMAT<br>00016<br>35 | hsa-mi<br>R-452-<br>5p  | ENSG00<br>000146<br>648 | EGF<br>R | prote<br>in_co<br>ding | chr7 | 5527<br>4795 | 552<br>748<br>01 | 5527<br>4795 | 552<br>748<br>01 | + | 3 | 0 | AG01<br>-4, A<br>G02 | 1 | 0 | 1 | 0 | 0 | 0 | 0 | 0 | 2 |
| MIMAT<br>00016<br>38 | hsa-mi<br>R-409-<br>5p  | ENSG00<br>000146<br>648 | EGF<br>R | prote<br>in_co<br>ding | chr7 | 5527<br>4764 | 552<br>747<br>69 | 5527<br>4764 | 552<br>747<br>69 | + | 1 | 0 | AG02                 | 1 | 0 | 1 | 0 | 0 | 0 | 0 | 0 | 6 |
| MIMAT<br>00016<br>38 | hsa-mi<br>R-409-<br>5p  | ENSG00<br>000146<br>648 | EGF<br>R | prote<br>in_co<br>ding | chr7 | 5527<br>7851 | 552<br>778<br>56 | 5527<br>7851 | 552<br>778<br>56 | + | 2 | 0 | AG01<br>-4, A<br>G02 | 0 | 0 | 1 | 0 | 0 | 0 | 0 | 0 | 6 |
| MIMAT<br>00016<br>39 | hsa-mi<br>R-409-<br>3p  | ENSG00<br>000146<br>648 | EGF<br>R | prote<br>in_co<br>ding | chr7 | 5522<br>4617 | 552<br>246<br>22 | 5522<br>4617 | 552<br>246<br>22 | + | 1 | 0 | AG02                 | 1 | 0 | 0 | 0 | 0 | 0 | 0 | 0 | 4 |
| MIMAT                | hsa-mi                  | ENSG00                  | EGF      | prote                  | chr7 | 5527         | 552              | 5527         | 552              | + | 1 | 0 | AG01                 | 0 | 0 | 1 | 1 | 0 | 0 | 0 | 0 | 4 |

|              |                 |                 |      |                |      |          |          |          |          |   |   |   |              |   |   |   |   |   |   |   |   |
|--------------|-----------------|-----------------|------|----------------|------|----------|----------|----------|----------|---|---|---|--------------|---|---|---|---|---|---|---|---|
| 0001639      | R-409-3p        | 000146648       | R    | in_coding      |      | 5528     | 75534    | 5507     | 75535    |   |   |   | -4           |   |   |   |   |   |   |   |   |
| MIMAT0001639 | hsa-miR-409-3p  | ENSG00000146648 | EGFR | protein_coding | chr7 | 55279086 | 55279091 | 55279064 | 55279092 | + | 1 | 0 | AG01-4       | 0 | 0 | 1 | 1 | 0 | 0 | 0 | 4 |
| MIMAT0002171 | hsa-miR-410-3p  | ENSG00000146648 | EGFR | protein_coding | chr7 | 55275552 | 55275557 | 55275530 | 55275558 | + | 1 | 0 | AG01-4       | 0 | 0 | 1 | 1 | 0 | 0 | 0 | 2 |
| MIMAT0002171 | hsa-miR-410-3p  | ENSG00000146648 | EGFR | protein_coding | chr7 | 55277898 | 55277903 | 55277876 | 55277904 | + | 3 | 1 | AG01-4, AG02 | 0 | 0 | 1 | 1 | 0 | 0 | 0 | 2 |
| MIMAT0002171 | hsa-miR-410-3p  | ENSG00000146648 | EGFR | protein_coding | chr7 | 55277935 | 55277940 | 55277913 | 55277941 | + | 3 | 0 | AG01-4, AG02 | 0 | 0 | 1 | 1 | 0 | 0 | 0 | 2 |
| MIMAT0002171 | hsa-miR-410-3p  | ENSG00000146648 | EGFR | protein_coding | chr7 | 55279193 | 55279198 | 55279171 | 55279199 | + | 1 | 0 | AG01-4       | 0 | 0 | 1 | 1 | 0 | 0 | 0 | 2 |
| MIMAT0002807 | hsa-miR-491-5p  | ENSG00000146648 | EGFR | protein_coding | chr7 | 55273983 | 55273987 | 55273966 | 55273984 | + | 5 | 0 | AG01-4, AG02 | 1 | 0 | 1 | 0 | 2 | 0 | 0 | 5 |
| MIMAT0002807 | hsa-miR-491-5p  | ENSG00000146648 | EGFR | protein_coding | chr7 | 55273997 | 55273983 | 55273997 | 55273983 | + | 5 | 0 | AG01-4, AG02 | 1 | 0 | 1 | 0 | 0 | 0 | 0 | 5 |
| MIMAT0002809 | hsa-miR-146b-5p | ENSG00000146648 | EGFR | protein_coding | chr7 | 55274230 | 55274235 | 55274208 | 55274236 | + | 4 | 0 | AG01-4, AG02 | 1 | 0 | 1 | 1 | 0 | 0 | 0 | 7 |

|              |                 |                 |      |                |      |          |          |          |          |   |   |   |              |   |   |   |   |   |   |   |   |
|--------------|-----------------|-----------------|------|----------------|------|----------|----------|----------|----------|---|---|---|--------------|---|---|---|---|---|---|---|---|
| MIMAT0002809 | hsa-miR-146b-5p | ENSG00000146648 | EGFR | protein_coding | chr7 | 55275861 | 55275867 | 55275840 | 55275868 | + | 1 | 0 | AG02         | 0 | 0 | 1 | 1 | 0 | 0 | 0 | 7 |
| MIMAT0002813 | hsa-miR-493-5p  | ENSG00000146648 | EGFR | protein_coding | chr7 | 55277858 | 55277863 | 55277836 | 55277864 | + | 2 | 0 | AG01-4, AG02 | 0 | 0 | 1 | 1 | 0 | 0 | 0 | 1 |
| MIMAT0002813 | hsa-miR-493-5p  | ENSG00000146648 | EGFR | protein_coding | chr7 | 55279166 | 55279171 | 55279144 | 55279172 | + | 1 | 0 | AG01-4       | 0 | 0 | 1 | 1 | 0 | 0 | 1 | 1 |
| MIMAT0002814 | hsa-miR-432-5p  | ENSG00000146648 | EGFR | protein_coding | chr7 | 55273832 | 55273837 | 55273832 | 55273837 | + | 2 | 0 | AG02         | 1 | 0 | 0 | 0 | 0 | 0 | 0 | 1 |
| MIMAT0002817 | hsa-miR-495-3p  | ENSG00000146648 | EGFR | protein_coding | chr7 | 55274227 | 55274232 | 55274205 | 55274233 | + | 4 | 0 | AG01-4, AG02 | 1 | 0 | 1 | 1 | 0 | 0 | 0 | 3 |
| MIMAT0002817 | hsa-miR-495-3p  | ENSG00000146648 | EGFR | protein_coding | chr7 | 55277889 | 55277894 | 55277867 | 55277895 | + | 2 | 0 | AG01-4, AG02 | 0 | 0 | 1 | 1 | 0 | 0 | 0 | 3 |
| MIMAT0002819 | hsa-miR-193b-3p | ENSG00000146648 | EGFR | protein_coding | chr7 | 55238350 | 55238355 | 55238350 | 55238355 | + | 2 | 0 | AG02         | 1 | 0 | 0 | 0 | 0 | 0 | 0 | 7 |
| MIMAT0002820 | hsa-miR-497-5p  | ENSG00000146648 | EGFR | protein_coding | chr7 | 55274319 | 55274324 | 55274319 | 55274324 | + | 4 | 0 | AG01-4, AG02 | 1 | 0 | 1 | 0 | 0 | 0 | 0 | 2 |
| MIMAT00028   | hsa-miR-181d    | ENSG00000146648 | EGFR | protein_coding | chr7 | 55274197 | 55274242 | 55274197 | 55274242 | + | 4 | 0 | AG01-4, A    | 1 | 0 | 0 | 0 | 0 | 0 | 0 | 3 |

|                      |                         |                         |          |                        |      |              |                  |              |                  |   |   |   |                      |   |   |   |   |   |   |   |   |   |
|----------------------|-------------------------|-------------------------|----------|------------------------|------|--------------|------------------|--------------|------------------|---|---|---|----------------------|---|---|---|---|---|---|---|---|---|
| 21                   | -5p                     | 648                     |          | ding                   |      |              | 02               |              | 02               |   |   |   | G02                  |   |   |   |   |   |   |   |   |   |
| MIMAT<br>00028<br>23 | hsa-mi<br>R-512-<br>3p  | ENSG00<br>000146<br>648 | EGF<br>R | prote<br>in_co<br>ding | chr7 | 5527<br>3043 | 552<br>730<br>71 | 5527<br>3043 | 552<br>730<br>71 | + | 3 | 0 | AG01<br>-4, A<br>G02 | 0 | 0 | 0 | 1 | 0 | 0 | 0 | 0 | 4 |
| MIMAT<br>00028<br>23 | hsa-mi<br>R-512-<br>3p  | ENSG00<br>000146<br>648 | EGF<br>R | prote<br>in_co<br>ding | chr7 | 5527<br>4521 | 552<br>745<br>26 | 5527<br>4499 | 552<br>745<br>27 | + | 1 | 1 | AG02                 | 1 | 0 | 1 | 1 | 0 | 0 | 0 | 0 | 4 |
| MIMAT<br>00028<br>23 | hsa-mi<br>R-512-<br>3p  | ENSG00<br>000146<br>648 | EGF<br>R | prote<br>in_co<br>ding | chr7 | 5527<br>6356 | 552<br>763<br>61 | 5527<br>6334 | 552<br>763<br>62 | + | 1 | 0 | AG01<br>-4           | 0 | 0 | 1 | 1 | 0 | 0 | 0 | 0 | 4 |
| MIMAT<br>00028<br>23 | hsa-mi<br>R-512-<br>3p  | ENSG00<br>000146<br>648 | EGF<br>R | prote<br>in_co<br>ding | chr7 | 5527<br>7884 | 552<br>778<br>89 | 5527<br>7862 | 552<br>778<br>90 | + | 2 | 0 | AG01<br>-4, A<br>G02 | 0 | 1 | 1 | 1 | 0 | 0 | 0 | 0 | 4 |
| MIMAT<br>00028<br>24 | hsa-mi<br>R-498         | ENSG00<br>000146<br>648 | EGF<br>R | prote<br>in_co<br>ding | chr7 | 5527<br>9112 | 552<br>791<br>40 | 5527<br>9112 | 552<br>791<br>40 | + | 1 | 0 | AG01<br>-4           | 0 | 0 | 0 | 1 | 0 | 0 | 0 | 0 | 3 |
| MIMAT<br>00028<br>25 | hsa-mi<br>R-520e        | ENSG00<br>000146<br>648 | EGF<br>R | prote<br>in_co<br>ding | chr7 | 5527<br>4521 | 552<br>745<br>27 | 5527<br>4500 | 552<br>745<br>28 | + | 1 | 2 | AG02                 | 1 | 0 | 1 | 1 | 1 | 0 | 0 | 0 | 4 |
| MIMAT<br>00028<br>25 | hsa-mi<br>R-520e        | ENSG00<br>000146<br>648 | EGF<br>R | prote<br>in_co<br>ding | chr7 | 5527<br>7884 | 552<br>778<br>90 | 5527<br>7863 | 552<br>778<br>91 | + | 2 | 0 | AG01<br>-4, A<br>G02 | 0 | 0 | 1 | 1 | 0 | 0 | 1 | 4 |   |
| MIMAT<br>00028<br>28 | hsa-mi<br>R-519e<br>-5p | ENSG00<br>000146<br>648 | EGF<br>R | prote<br>in_co<br>ding | chr7 | 5526<br>6472 | 552<br>664<br>94 | 5526<br>6472 | 552<br>664<br>94 | + | 1 | 0 | AG01<br>-4           | 0 | 1 | 0 | 0 | 0 | 0 | 0 | 0 | 1 |
| MIMAT                | hsa-mi                  | ENSG00                  | EGF      | prote                  | chr7 | 5527         | 552              | 5527         | 552              | + | 1 | 2 | AG02                 | 1 | 0 | 1 | 1 | 0 | 0 | 0 | 0 | 4 |

|                      |                         |                         |          |                        |      |              |                  |              |                  |   |   |   |                      |   |   |   |   |   |   |   |   |
|----------------------|-------------------------|-------------------------|----------|------------------------|------|--------------|------------------|--------------|------------------|---|---|---|----------------------|---|---|---|---|---|---|---|---|
| 00028<br>30          | R-520f<br>-3p           | 000146<br>648           | R        | in_co<br>ding          |      | 4520         | 745<br>26        | 4499         | 745<br>27        |   |   |   |                      |   |   |   |   |   |   |   |   |
| MIMAT<br>00028<br>30 | hsa-mi<br>R-520f<br>-3p | ENSG00<br>000146<br>648 | EGF<br>R | prote<br>in_co<br>ding | chr7 | 5527<br>6356 | 552<br>763<br>61 | 5527<br>6334 | 552<br>763<br>62 | + | 1 | 0 | AG01<br>-4           | 0 | 0 | 1 | 1 | 0 | 0 | 0 | 4 |
| MIMAT<br>00028<br>31 | hsa-mi<br>R-519c<br>-5p | ENSG00<br>000146<br>648 | EGF<br>R | prote<br>in_co<br>ding | chr7 | 5523<br>8548 | 552<br>385<br>53 | 5523<br>8548 | 552<br>385<br>53 | + | 2 | 0 | AG02                 | 1 | 0 | 0 | 0 | 0 | 0 | 0 | 0 |
| MIMAT<br>00028<br>32 | hsa-mi<br>R-519c<br>-3p | ENSG00<br>000146<br>648 | EGF<br>R | prote<br>in_co<br>ding | chr7 | 5527<br>4522 | 552<br>745<br>27 | 5527<br>4522 | 552<br>745<br>27 | + | 1 | 0 | AG02                 | 1 | 0 | 0 | 0 | 0 | 0 | 0 | 3 |
| MIMAT<br>00028<br>34 | hsa-mi<br>R-520a<br>-3p | ENSG00<br>000146<br>648 | EGF<br>R | prote<br>in_co<br>ding | chr7 | 5527<br>4521 | 552<br>745<br>27 | 5527<br>4500 | 552<br>745<br>28 | + | 1 | 2 | AG02                 | 1 | 0 | 1 | 1 | 1 | 0 | 0 | 2 |
| MIMAT<br>00028<br>34 | hsa-mi<br>R-520a<br>-3p | ENSG00<br>000146<br>648 | EGF<br>R | prote<br>in_co<br>ding | chr7 | 5527<br>7884 | 552<br>778<br>90 | 5527<br>7863 | 552<br>778<br>91 | + | 2 | 0 | AG01<br>-4, A<br>G02 | 0 | 0 | 1 | 1 | 0 | 0 | 1 | 2 |
| MIMAT<br>00028<br>36 | hsa-mi<br>R-526b<br>-3p | ENSG00<br>000146<br>648 | EGF<br>R | prote<br>in_co<br>ding | chr7 | 5527<br>7885 | 552<br>778<br>91 | 5527<br>7885 | 552<br>778<br>91 | + | 2 | 0 | AG01<br>-4, A<br>G02 | 0 | 0 | 0 | 0 | 0 | 0 | 1 | 2 |
| MIMAT<br>00028<br>37 | hsa-mi<br>R-519b<br>-3p | ENSG00<br>000146<br>648 | EGF<br>R | prote<br>in_co<br>ding | chr7 | 5527<br>4522 | 552<br>745<br>27 | 5527<br>4522 | 552<br>745<br>27 | + | 1 | 0 | AG02                 | 1 | 0 | 0 | 0 | 0 | 0 | 0 | 1 |
| MIMAT<br>00028<br>42 | hsa-mi<br>R-518f<br>-3p | ENSG00<br>000146<br>648 | EGF<br>R | prote<br>in_co<br>ding | chr7 | 5523<br>8267 | 552<br>382<br>72 | 5523<br>8267 | 552<br>382<br>72 | + | 1 | 0 | AG02                 | 1 | 0 | 0 | 0 | 0 | 0 | 0 | 2 |

|                      |                         |                         |          |                        |      |              |                  |              |                  |   |   |   |                      |   |   |   |   |   |   |   |   |
|----------------------|-------------------------|-------------------------|----------|------------------------|------|--------------|------------------|--------------|------------------|---|---|---|----------------------|---|---|---|---|---|---|---|---|
| MIMAT<br>00028<br>42 | hsa-mi<br>R-518f<br>-3p | ENSG00<br>000146<br>648 | EGF<br>R | prote<br>in_co<br>ding | chr7 | 5527<br>4223 | 552<br>742<br>28 | 5527<br>4223 | 552<br>742<br>28 | + | 4 | 0 | AG01<br>-4, A<br>G02 | 1 | 0 | 0 | 0 | 0 | 0 | 0 | 2 |
| MIMAT<br>00028<br>42 | hsa-mi<br>R-518f<br>-3p | ENSG00<br>000146<br>648 | EGF<br>R | prote<br>in_co<br>ding | chr7 | 5527<br>4476 | 552<br>744<br>81 | 5527<br>4476 | 552<br>744<br>81 | + | 1 | 0 | AG02                 | 1 | 0 | 0 | 0 | 0 | 0 | 0 | 2 |
| MIMAT<br>00028<br>43 | hsa-mi<br>R-520b        | ENSG00<br>000146<br>648 | EGF<br>R | prote<br>in_co<br>ding | chr7 | 5527<br>4521 | 552<br>745<br>27 | 5527<br>4500 | 552<br>745<br>28 | + | 1 | 2 | AG02                 | 1 | 0 | 1 | 1 | 1 | 0 | 0 | 2 |
| MIMAT<br>00028<br>43 | hsa-mi<br>R-520b        | ENSG00<br>000146<br>648 | EGF<br>R | prote<br>in_co<br>ding | chr7 | 5527<br>7884 | 552<br>778<br>90 | 5527<br>7863 | 552<br>778<br>91 | + | 2 | 0 | AG01<br>-4, A<br>G02 | 0 | 0 | 1 | 1 | 0 | 0 | 1 | 2 |
| MIMAT<br>00028<br>44 | hsa-mi<br>R-518b        | ENSG00<br>000146<br>648 | EGF<br>R | prote<br>in_co<br>ding | chr7 | 5523<br>8267 | 552<br>382<br>72 | 5523<br>8267 | 552<br>382<br>72 | + | 1 | 0 | AG02                 | 1 | 0 | 0 | 0 | 0 | 0 | 0 | 3 |
| MIMAT<br>00028<br>44 | hsa-mi<br>R-518b        | ENSG00<br>000146<br>648 | EGF<br>R | prote<br>in_co<br>ding | chr7 | 5527<br>4223 | 552<br>742<br>28 | 5527<br>4223 | 552<br>742<br>28 | + | 4 | 0 | AG01<br>-4, A<br>G02 | 1 | 0 | 0 | 0 | 0 | 0 | 0 | 3 |
| MIMAT<br>00028<br>44 | hsa-mi<br>R-518b        | ENSG00<br>000146<br>648 | EGF<br>R | prote<br>in_co<br>ding | chr7 | 5527<br>4476 | 552<br>744<br>81 | 5527<br>4476 | 552<br>744<br>81 | + | 1 | 0 | AG02                 | 1 | 0 | 0 | 0 | 0 | 0 | 0 | 3 |
| MIMAT<br>00028<br>45 | hsa-mi<br>R-526a        | ENSG00<br>000146<br>648 | EGF<br>R | prote<br>in_co<br>ding | chr7 | 5523<br>8548 | 552<br>385<br>53 | 5523<br>8548 | 552<br>385<br>53 | + | 2 | 0 | AG02                 | 1 | 0 | 0 | 0 | 0 | 0 | 0 | 0 |
| MIMAT<br>00028       | hsa-mi<br>R-520c        | ENSG00<br>000146        | EGF<br>R | prote<br>in_co         | chr7 | 5527<br>4521 | 552<br>745       | 5527<br>4500 | 552<br>745       | + | 1 | 2 | AG02                 | 1 | 0 | 1 | 1 | 1 | 0 | 0 | 2 |

|                      |                         |                         |          |                        |      |              |                  |              |                  |   |   |   |                      |   |   |   |   |   |   |   |   |   |
|----------------------|-------------------------|-------------------------|----------|------------------------|------|--------------|------------------|--------------|------------------|---|---|---|----------------------|---|---|---|---|---|---|---|---|---|
| 46                   | -3p                     | 648                     |          | ding                   |      |              | 27               |              | 28               |   |   |   |                      |   |   |   |   |   |   |   |   |   |
| MIMAT<br>00028<br>46 | hsa-mi<br>R-520c<br>-3p | ENSG00<br>000146<br>648 | EGF<br>R | prote<br>in_co<br>ding | chr7 | 5527<br>7884 | 552<br>778<br>90 | 5527<br>7863 | 552<br>778<br>91 | + | 2 | 0 | AG01<br>-4, A<br>G02 | 0 | 0 | 1 | 1 | 0 | 0 | 1 | 2 |   |
| MIMAT<br>00028<br>48 | hsa-mi<br>R-518c<br>-3p | ENSG00<br>000146<br>648 | EGF<br>R | prote<br>in_co<br>ding | chr7 | 5523<br>8267 | 552<br>382<br>72 | 5523<br>8267 | 552<br>382<br>72 | + | 1 | 0 | AG02                 | 1 | 0 | 0 | 0 | 0 | 0 | 0 | 0 | 1 |
| MIMAT<br>00028<br>48 | hsa-mi<br>R-518c<br>-3p | ENSG00<br>000146<br>648 | EGF<br>R | prote<br>in_co<br>ding | chr7 | 5527<br>4223 | 552<br>742<br>28 | 5527<br>4223 | 552<br>742<br>28 | + | 4 | 0 | AG01<br>-4, A<br>G02 | 1 | 0 | 0 | 0 | 0 | 0 | 0 | 0 | 1 |
| MIMAT<br>00028<br>48 | hsa-mi<br>R-518c<br>-3p | ENSG00<br>000146<br>648 | EGF<br>R | prote<br>in_co<br>ding | chr7 | 5527<br>4476 | 552<br>744<br>81 | 5527<br>4476 | 552<br>744<br>81 | + | 1 | 0 | AG02                 | 1 | 0 | 0 | 0 | 0 | 0 | 0 | 0 | 1 |
| MIMAT<br>00028<br>49 | hsa-mi<br>R-524-<br>5p  | ENSG00<br>000146<br>648 | EGF<br>R | prote<br>in_co<br>ding | chr7 | 5527<br>3969 | 552<br>739<br>74 | 5527<br>3967 | 552<br>739<br>74 | + | 4 | 0 | AG01<br>-4, A<br>G02 | 1 | 0 | 1 | 0 | 0 | 0 | 0 | 0 | 3 |
| MIMAT<br>00028<br>49 | hsa-mi<br>R-524-<br>5p  | ENSG00<br>000146<br>648 | EGF<br>R | prote<br>in_co<br>ding | chr7 | 5527<br>4789 | 552<br>747<br>95 | 5527<br>4768 | 552<br>747<br>96 | + | 2 | 0 | AG02                 | 1 | 0 | 1 | 1 | 0 | 0 | 0 | 0 | 3 |
| MIMAT<br>00028<br>49 | hsa-mi<br>R-524-<br>5p  | ENSG00<br>000146<br>648 | EGF<br>R | prote<br>in_co<br>ding | chr7 | 5527<br>5710 | 552<br>757<br>38 | 5527<br>5710 | 552<br>757<br>38 | + | 2 | 0 | AG02                 | 0 | 0 | 0 | 1 | 0 | 0 | 0 | 0 | 3 |
| MIMAT<br>00028<br>49 | hsa-mi<br>R-524-<br>5p  | ENSG00<br>000146<br>648 | EGF<br>R | prote<br>in_co<br>ding | chr7 | 5527<br>7390 | 552<br>773<br>96 | 5527<br>7369 | 552<br>773<br>97 | + | 1 | 0 | AG01<br>-4           | 0 | 0 | 1 | 1 | 0 | 0 | 0 | 0 | 3 |
| MIMAT                | hsa-mi                  | ENSG00                  | EGF      | prote                  | chr7 | 5527         | 552              | 5527         | 552              | + | 1 | 0 | AG01                 | 0 | 0 | 0 | 1 | 0 | 0 | 0 | 3 |   |

|                      |                         |                         |          |                        |      |              |                  |              |                  |   |   |   |                      |   |   |   |   |   |   |   |   |
|----------------------|-------------------------|-------------------------|----------|------------------------|------|--------------|------------------|--------------|------------------|---|---|---|----------------------|---|---|---|---|---|---|---|---|
| 00028<br>49          | R-524-<br>5p            | 000146<br>648           | R        | in_co<br>ding          |      | 7416         | 774<br>44        | 7416         | 774<br>44        |   |   |   | -4                   |   |   |   |   |   |   |   |   |
| MIMAT<br>00028<br>49 | hsa-mi<br>R-524-<br>5p  | ENSG00<br>000146<br>648 | EGF<br>R | prote<br>in_co<br>ding | chr7 | 5527<br>9164 | 552<br>791<br>69 | 5527<br>9142 | 552<br>791<br>70 | + | 1 | 0 | AG01<br>-4           | 0 | 0 | 1 | 1 | 0 | 0 | 0 | 3 |
| MIMAT<br>00028<br>53 | hsa-mi<br>R-519d<br>-3p | ENSG00<br>000146<br>648 | EGF<br>R | prote<br>in_co<br>ding | chr7 | 5527<br>7885 | 552<br>778<br>91 | 5527<br>7885 | 552<br>778<br>91 | + | 2 | 0 | AG01<br>-4, A<br>G02 | 0 | 0 | 0 | 0 | 0 | 0 | 1 | 2 |
| MIMAT<br>00028<br>55 | hsa-mi<br>R-520d<br>-5p | ENSG00<br>000146<br>648 | EGF<br>R | prote<br>in_co<br>ding | chr7 | 5527<br>3969 | 552<br>739<br>74 | 5527<br>3967 | 552<br>739<br>74 | + | 4 | 0 | AG01<br>-4, A<br>G02 | 1 | 0 | 1 | 0 | 0 | 0 | 0 | 1 |
| MIMAT<br>00028<br>55 | hsa-mi<br>R-520d<br>-5p | ENSG00<br>000146<br>648 | EGF<br>R | prote<br>in_co<br>ding | chr7 | 5527<br>4789 | 552<br>747<br>95 | 5527<br>4768 | 552<br>747<br>96 | + | 2 | 0 | AG02                 | 1 | 0 | 1 | 1 | 0 | 0 | 0 | 1 |
| MIMAT<br>00028<br>55 | hsa-mi<br>R-520d<br>-5p | ENSG00<br>000146<br>648 | EGF<br>R | prote<br>in_co<br>ding | chr7 | 5527<br>5710 | 552<br>757<br>38 | 5527<br>5710 | 552<br>757<br>38 | + | 2 | 0 | AG02                 | 0 | 0 | 0 | 1 | 0 | 0 | 0 | 1 |
| MIMAT<br>00028<br>55 | hsa-mi<br>R-520d<br>-5p | ENSG00<br>000146<br>648 | EGF<br>R | prote<br>in_co<br>ding | chr7 | 5527<br>7390 | 552<br>773<br>96 | 5527<br>7369 | 552<br>773<br>97 | + | 1 | 0 | AG01<br>-4           | 0 | 0 | 1 | 1 | 0 | 0 | 0 | 1 |
| MIMAT<br>00028<br>55 | hsa-mi<br>R-520d<br>-5p | ENSG00<br>000146<br>648 | EGF<br>R | prote<br>in_co<br>ding | chr7 | 5527<br>7416 | 552<br>774<br>44 | 5527<br>7416 | 552<br>774<br>44 | + | 1 | 0 | AG01<br>-4           | 0 | 0 | 0 | 1 | 0 | 0 | 0 | 1 |
| MIMAT<br>00028<br>55 | hsa-mi<br>R-520d<br>-5p | ENSG00<br>000146<br>648 | EGF<br>R | prote<br>in_co<br>ding | chr7 | 5527<br>9164 | 552<br>791<br>69 | 5527<br>9142 | 552<br>791<br>70 | + | 1 | 0 | AG01<br>-4           | 0 | 0 | 1 | 1 | 0 | 0 | 0 | 1 |

|                      |                         |                         |          |                        |      |              |                  |              |                  |   |   |   |                      |   |   |   |   |   |   |   |   |
|----------------------|-------------------------|-------------------------|----------|------------------------|------|--------------|------------------|--------------|------------------|---|---|---|----------------------|---|---|---|---|---|---|---|---|
| MIMAT<br>00028<br>56 | hsa-mi<br>R-520d<br>-3p | ENSG00<br>000146<br>648 | EGF<br>R | prote<br>in_co<br>ding | chr7 | 5527<br>4521 | 552<br>745<br>27 | 5527<br>4500 | 552<br>745<br>28 | + | 1 | 2 | AG02                 | 1 | 0 | 1 | 1 | 1 | 0 | 0 | 2 |
| MIMAT<br>00028<br>56 | hsa-mi<br>R-520d<br>-3p | ENSG00<br>000146<br>648 | EGF<br>R | prote<br>in_co<br>ding | chr7 | 5527<br>7884 | 552<br>778<br>90 | 5527<br>7863 | 552<br>778<br>91 | + | 2 | 0 | AG01<br>-4, A<br>G02 | 0 | 0 | 1 | 1 | 0 | 0 | 1 | 2 |
| MIMAT<br>00028<br>58 | hsa-mi<br>R-520g<br>-3p | ENSG00<br>000146<br>648 | EGF<br>R | prote<br>in_co<br>ding | chr7 | 5527<br>7886 | 552<br>778<br>92 | 5527<br>7886 | 552<br>778<br>92 | + | 2 | 0 | AG01<br>-4, A<br>G02 | 0 | 0 | 1 | 0 | 0 | 0 | 0 | 3 |
| MIMAT<br>00028<br>59 | hsa-mi<br>R-516b<br>-5p | ENSG00<br>000146<br>648 | EGF<br>R | prote<br>in_co<br>ding | chr7 | 5527<br>3339 | 552<br>733<br>44 | 5527<br>3339 | 552<br>733<br>44 | + | 3 | 0 | AG01<br>-4, A<br>G02 | 1 | 0 | 0 | 0 | 0 | 0 | 0 | 3 |
| MIMAT<br>00028<br>59 | hsa-mi<br>R-516b<br>-5p | ENSG00<br>000146<br>648 | EGF<br>R | prote<br>in_co<br>ding | chr7 | 5527<br>3769 | 552<br>737<br>76 | 5527<br>3769 | 552<br>737<br>76 | + | 1 | 0 | AG02                 | 1 | 0 | 0 | 0 | 0 | 0 | 0 | 3 |
| MIMAT<br>00028<br>63 | hsa-mi<br>R-518a<br>-3p | ENSG00<br>000146<br>648 | EGF<br>R | prote<br>in_co<br>ding | chr7 | 5523<br>8267 | 552<br>382<br>72 | 5523<br>8267 | 552<br>382<br>72 | + | 1 | 0 | AG02                 | 1 | 0 | 0 | 0 | 0 | 0 | 0 | 1 |
| MIMAT<br>00028<br>63 | hsa-mi<br>R-518a<br>-3p | ENSG00<br>000146<br>648 | EGF<br>R | prote<br>in_co<br>ding | chr7 | 5527<br>4223 | 552<br>742<br>28 | 5527<br>4223 | 552<br>742<br>28 | + | 4 | 0 | AG01<br>-4, A<br>G02 | 1 | 0 | 0 | 0 | 0 | 0 | 0 | 1 |
| MIMAT<br>00028<br>63 | hsa-mi<br>R-518a<br>-3p | ENSG00<br>000146<br>648 | EGF<br>R | prote<br>in_co<br>ding | chr7 | 5527<br>4476 | 552<br>744<br>81 | 5527<br>4476 | 552<br>744<br>81 | + | 1 | 0 | AG02                 | 1 | 0 | 0 | 0 | 0 | 0 | 0 | 1 |
| MIMAT<br>00028       | hsa-mi<br>R-518d        | ENSG00<br>000146        | EGF<br>R | prote<br>in_co         | chr7 | 5523<br>8267 | 552<br>382       | 5523<br>8267 | 552<br>382       | + | 1 | 0 | AG02                 | 1 | 0 | 0 | 0 | 0 | 0 | 0 | 3 |

|                      |                         |                         |          |                        |      |              |                  |              |                  |   |   |   |                      |   |   |   |   |   |   |   |   |   |
|----------------------|-------------------------|-------------------------|----------|------------------------|------|--------------|------------------|--------------|------------------|---|---|---|----------------------|---|---|---|---|---|---|---|---|---|
| 64                   | -3p                     | 648                     |          | ding                   |      |              | 72               |              | 72               |   |   |   |                      |   |   |   |   |   |   |   |   |   |
| MIMAT<br>00028<br>64 | hsa-mi<br>R-518d<br>-3p | ENSG00<br>000146<br>648 | EGF<br>R | prote<br>in_co<br>ding | chr7 | 5527<br>4223 | 552<br>742<br>28 | 5527<br>4223 | 552<br>742<br>28 | + | 4 | 0 | AG01<br>-4, A<br>G02 | 1 | 0 | 0 | 0 | 0 | 0 | 0 | 0 | 3 |
| MIMAT<br>00028<br>64 | hsa-mi<br>R-518d<br>-3p | ENSG00<br>000146<br>648 | EGF<br>R | prote<br>in_co<br>ding | chr7 | 5527<br>4476 | 552<br>744<br>81 | 5527<br>4476 | 552<br>744<br>81 | + | 1 | 0 | AG02                 | 1 | 0 | 0 | 0 | 0 | 0 | 0 | 0 | 3 |
| MIMAT<br>00028<br>67 | hsa-mi<br>R-520h        | ENSG00<br>000146<br>648 | EGF<br>R | prote<br>in_co<br>ding | chr7 | 5527<br>7886 | 552<br>778<br>92 | 5527<br>7886 | 552<br>778<br>92 | + | 2 | 0 | AG01<br>-4, A<br>G02 | 0 | 0 | 1 | 0 | 0 | 0 | 0 | 0 | 4 |
| MIMAT<br>00028<br>69 | hsa-mi<br>R-519a<br>-3p | ENSG00<br>000146<br>648 | EGF<br>R | prote<br>in_co<br>ding | chr7 | 5527<br>4522 | 552<br>745<br>27 | 5527<br>4522 | 552<br>745<br>27 | + | 1 | 0 | AG02                 | 1 | 0 | 0 | 0 | 0 | 0 | 0 | 0 | 2 |
| MIMAT<br>00028<br>74 | hsa-mi<br>R-503-<br>5p  | ENSG00<br>000146<br>648 | EGF<br>R | prote<br>in_co<br>ding | chr7 | 5527<br>4319 | 552<br>743<br>24 | 5527<br>4319 | 552<br>743<br>24 | + | 4 | 0 | AG01<br>-4, A<br>G02 | 1 | 0 | 1 | 0 | 0 | 0 | 0 | 0 | 7 |
| MIMAT<br>00028<br>77 | hsa-mi<br>R-513a<br>-5p | ENSG00<br>000146<br>648 | EGF<br>R | prote<br>in_co<br>ding | chr7 | 5527<br>3511 | 552<br>735<br>16 | 5527<br>3511 | 552<br>735<br>16 | + | 4 | 0 | AG01<br>-4, A<br>G02 | 1 | 0 | 1 | 0 | 0 | 0 | 0 | 0 | 3 |
| MIMAT<br>00028<br>77 | hsa-mi<br>R-513a<br>-5p | ENSG00<br>000146<br>648 | EGF<br>R | prote<br>in_co<br>ding | chr7 | 5527<br>5944 | 552<br>759<br>49 | 5527<br>5944 | 552<br>759<br>49 | + | 2 | 0 | AG01<br>-4           | 0 | 0 | 1 | 0 | 0 | 0 | 0 | 0 | 3 |
| MIMAT<br>00028<br>78 | hsa-mi<br>R-506-<br>3p  | ENSG00<br>000146<br>648 | EGF<br>R | prote<br>in_co<br>ding | chr7 | 5527<br>4501 | 552<br>745<br>06 | 5527<br>4501 | 552<br>745<br>06 | + | 1 | 0 | AG02                 | 1 | 0 | 0 | 0 | 0 | 0 | 0 | 0 | 5 |
| MIMAT                | hsa-mi                  | ENSG00                  | EGF      | prote                  | chr7 | 5523         | 552              | 5523         | 552              | + | 1 | 0 | AG02                 | 1 | 0 | 1 | 0 | 0 | 0 | 0 | 0 | 8 |

|                      |                        |                         |          |                        |      |              |                  |              |                  |   |   |   |                      |   |   |   |   |   |   |   |    |
|----------------------|------------------------|-------------------------|----------|------------------------|------|--------------|------------------|--------------|------------------|---|---|---|----------------------|---|---|---|---|---|---|---|----|
| 00028<br>81          | R-509-<br>3p           | 000146<br>648           | R        | in_co<br>ding          |      | 8721         | 387<br>27        | 8721         | 387<br>27        |   |   |   |                      |   |   |   |   |   |   |   |    |
| MIMAT<br>00028<br>82 | hsa-mi<br>R-510-<br>5p | ENSG00<br>000146<br>648 | EGF<br>R | prote<br>in_co<br>ding | chr7 | 5527<br>9258 | 552<br>792<br>86 | 5527<br>9258 | 552<br>792<br>86 | + | 1 | 0 | AG01<br>-4           | 0 | 0 | 0 | 1 | 0 | 0 | 0 | 2  |
| MIMAT<br>00031<br>50 | hsa-mi<br>R-455-<br>5p | ENSG00<br>000146<br>648 | EGF<br>R | prote<br>in_co<br>ding | chr7 | 5527<br>3474 | 552<br>734<br>80 | 5527<br>3456 | 552<br>734<br>81 | + | 5 | 0 | AG01<br>-4, A<br>G02 | 1 | 0 | 1 | 0 | 1 | 0 | 0 | 5  |
| MIMAT<br>00031<br>50 | hsa-mi<br>R-455-<br>5p | ENSG00<br>000146<br>648 | EGF<br>R | prote<br>in_co<br>ding | chr7 | 5527<br>5503 | 552<br>755<br>08 | 5527<br>5503 | 552<br>755<br>08 | + | 1 | 0 | AG01<br>-4           | 0 | 0 | 1 | 0 | 0 | 0 | 0 | 5  |
| MIMAT<br>00031<br>61 | hsa-mi<br>R-493-<br>3p | ENSG00<br>000146<br>648 | EGF<br>R | prote<br>in_co<br>ding | chr7 | 5522<br>9298 | 552<br>293<br>18 | 5522<br>9298 | 552<br>293<br>18 | + | 1 | 0 | AG01<br>-4           | 0 | 1 | 0 | 0 | 0 | 0 | 0 | 0  |
| MIMAT<br>00031<br>65 | hsa-mi<br>R-545-<br>3p | ENSG00<br>000146<br>648 | EGF<br>R | prote<br>in_co<br>ding | chr7 | 5527<br>4094 | 552<br>740<br>99 | 5527<br>4094 | 552<br>740<br>99 | + | 4 | 0 | AG01<br>-4, A<br>G02 | 1 | 0 | 0 | 0 | 0 | 0 | 0 | 2  |
| MIMAT<br>00032<br>18 | hsa-mi<br>R-92b-<br>3p | ENSG00<br>000146<br>648 | EGF<br>R | prote<br>in_co<br>ding | chr7 | 5527<br>9123 | 552<br>791<br>51 | 5527<br>9123 | 552<br>791<br>51 | + | 1 | 0 | AG01<br>-4           | 0 | 0 | 0 | 1 | 0 | 0 | 0 | 6  |
| MIMAT<br>00032<br>39 | hsa-mi<br>R-574-<br>3p | ENSG00<br>000146<br>648 | EGF<br>R | prote<br>in_co<br>ding | chr7 | 5527<br>4028 | 552<br>740<br>34 | 5527<br>4027 | 552<br>740<br>34 | + | 5 | 0 | AG01<br>-4, A<br>G02 | 1 | 0 | 1 | 0 | 0 | 0 | 0 | 1  |
| MIMAT<br>00032<br>42 | hsa-mi<br>R-577        | ENSG00<br>000146<br>648 | EGF<br>R | prote<br>in_co<br>ding | chr7 | 5527<br>3567 | 552<br>735<br>73 | 5527<br>3567 | 552<br>735<br>73 | + | 1 | 0 | AG02                 | 1 | 0 | 0 | 0 | 0 | 0 | 0 | 11 |

|                      |                        |                         |          |                        |      |              |                  |              |                  |   |   |   |                      |   |   |   |   |   |   |   |    |
|----------------------|------------------------|-------------------------|----------|------------------------|------|--------------|------------------|--------------|------------------|---|---|---|----------------------|---|---|---|---|---|---|---|----|
| MIMAT<br>00032<br>44 | hsa-mi<br>R-579-<br>3p | ENSG00<br>000146<br>648 | EGF<br>R | prote<br>in_co<br>ding | chr7 | 5527<br>4312 | 552<br>743<br>17 | 5527<br>4290 | 552<br>743<br>18 | + | 4 | 2 | AG01<br>-4, A<br>G02 | 1 | 0 | 0 | 1 | 0 | 0 | 0 | 6  |
| MIMAT<br>00032<br>44 | hsa-mi<br>R-579-<br>3p | ENSG00<br>000146<br>648 | EGF<br>R | prote<br>in_co<br>ding | chr7 | 5527<br>9149 | 552<br>791<br>77 | 5527<br>9149 | 552<br>791<br>77 | + | 1 | 0 | AG01<br>-4           | 0 | 0 | 0 | 1 | 0 | 0 | 0 | 6  |
| MIMAT<br>00032<br>47 | hsa-mi<br>R-582-<br>5p | ENSG00<br>000146<br>648 | EGF<br>R | prote<br>in_co<br>ding | chr7 | 5527<br>3871 | 552<br>738<br>76 | 5527<br>3871 | 552<br>738<br>76 | + | 1 | 0 | AG02                 | 1 | 0 | 0 | 0 | 0 | 0 | 0 | 9  |
| MIMAT<br>00032<br>67 | hsa-mi<br>R-599        | ENSG00<br>000146<br>648 | EGF<br>R | prote<br>in_co<br>ding | chr7 | 5527<br>4485 | 552<br>744<br>90 | 5527<br>4485 | 552<br>744<br>90 | + | 1 | 0 | AG02                 | 1 | 0 | 0 | 0 | 0 | 0 | 0 | 6  |
| MIMAT<br>00032<br>81 | hsa-mi<br>R-613        | ENSG00<br>000146<br>648 | EGF<br>R | prote<br>in_co<br>ding | chr7 | 5527<br>3493 | 552<br>734<br>98 | 5527<br>3471 | 552<br>734<br>99 | + | 5 | 0 | AG01<br>-4, A<br>G02 | 1 | 0 | 1 | 1 | 0 | 0 | 0 | 0  |
| MIMAT<br>00032<br>81 | hsa-mi<br>R-613        | ENSG00<br>000146<br>648 | EGF<br>R | prote<br>in_co<br>ding | chr7 | 5527<br>4056 | 552<br>740<br>61 | 5527<br>4034 | 552<br>740<br>62 | + | 5 | 0 | AG01<br>-4, A<br>G02 | 1 | 0 | 1 | 1 | 0 | 0 | 0 | 0  |
| MIMAT<br>00032<br>94 | hsa-mi<br>R-625-<br>5p | ENSG00<br>000146<br>648 | EGF<br>R | prote<br>in_co<br>ding | chr7 | 5523<br>8260 | 552<br>382<br>66 | 5523<br>8260 | 552<br>382<br>66 | + | 1 | 0 | AG02                 | 1 | 0 | 1 | 0 | 0 | 0 | 0 | 16 |
| MIMAT<br>00033<br>01 | hsa-mi<br>R-33b-<br>5p | ENSG00<br>000146<br>648 | EGF<br>R | prote<br>in_co<br>ding | chr7 | 5523<br>8699 | 552<br>387<br>04 | 5523<br>8686 | 552<br>387<br>05 | + | 1 | 0 | AG02                 | 1 | 0 | 0 | 0 | 1 | 0 | 0 | 12 |
| MIMAT<br>00033       | hsa-mi<br>R-33b-       | ENSG00<br>000146        | EGF<br>R | prote<br>in_co         | chr7 | 5527<br>4271 | 552<br>742       | 5527<br>4271 | 552<br>742       | + | 2 | 2 | AG01<br>-4, A        | 1 | 0 | 0 | 0 | 0 | 0 | 0 | 12 |



|                      |                         |                         |          |                        |      |              |                  |              |                  |   |   |   |                      |   |   |   |   |   |   |   |   |    |
|----------------------|-------------------------|-------------------------|----------|------------------------|------|--------------|------------------|--------------|------------------|---|---|---|----------------------|---|---|---|---|---|---|---|---|----|
| 00033<br>89          | R-542-<br>3p            | 000146<br>648           | R        | in_co<br>ding          |      | 4479         | 744<br>86        | 4479         | 744<br>86        |   |   |   |                      |   |   |   |   |   |   |   |   |    |
| MIMAT<br>00033<br>93 | hsa-mi<br>R-425-<br>5p  | ENSG00<br>000146<br>648 | EGF<br>R | prote<br>in_co<br>ding | chr7 | 5527<br>4098 | 552<br>741<br>03 | 5527<br>4098 | 552<br>741<br>03 | + | 4 | 0 | AG01<br>-4, A<br>G02 | 1 | 0 | 0 | 0 | 0 | 0 | 0 | 0 | 19 |
| MIMAT<br>00038<br>80 | hsa-mi<br>R-671-<br>5p  | ENSG00<br>000146<br>648 | EGF<br>R | prote<br>in_co<br>ding | chr7 | 5527<br>5849 | 552<br>758<br>54 | 5527<br>5849 | 552<br>758<br>54 | + | 1 | 0 | AG02                 | 0 | 0 | 1 | 0 | 0 | 0 | 0 | 0 | 12 |
| MIMAT<br>00041<br>85 | hsa-mi<br>R-802         | ENSG00<br>000146<br>648 | EGF<br>R | prote<br>in_co<br>ding | chr7 | 5527<br>4371 | 552<br>743<br>77 | 5527<br>4371 | 552<br>743<br>77 | + | 4 | 0 | AG01<br>-4, A<br>G02 | 1 | 0 | 0 | 0 | 0 | 0 | 0 | 0 | 1  |
| MIMAT<br>00046<br>14 | hsa-mi<br>R-193a<br>-5p | ENSG00<br>000146<br>648 | EGF<br>R | prote<br>in_co<br>ding | chr7 | 5527<br>3414 | 552<br>734<br>19 | 5527<br>3414 | 552<br>734<br>19 | + | 6 | 0 | AG01<br>-4, A<br>G02 | 1 | 0 | 0 | 0 | 0 | 0 | 0 | 0 | 1  |
| MIMAT<br>00046<br>82 | hsa-mi<br>R-361-<br>3p  | ENSG00<br>000146<br>648 | EGF<br>R | prote<br>in_co<br>ding | chr7 | 5527<br>6688 | 552<br>766<br>94 | 5527<br>6688 | 552<br>766<br>94 | + | 1 | 0 | AG01                 | 0 | 0 | 1 | 0 | 0 | 0 | 0 | 0 | 11 |
| MIMAT<br>00046<br>82 | hsa-mi<br>R-361-<br>3p  | ENSG00<br>000146<br>648 | EGF<br>R | prote<br>in_co<br>ding | chr7 | 5527<br>7314 | 552<br>773<br>20 | 5527<br>7314 | 552<br>773<br>20 | + | 2 | 0 | AG01<br>-4, A<br>G02 | 0 | 0 | 1 | 0 | 0 | 0 | 0 | 0 | 11 |
| MIMAT<br>00046<br>83 | hsa-mi<br>R-362-<br>3p  | ENSG00<br>000146<br>648 | EGF<br>R | prote<br>in_co<br>ding | chr7 | 5527<br>4753 | 552<br>747<br>58 | 5527<br>4753 | 552<br>747<br>58 | + | 1 | 0 | AG02                 | 1 | 0 | 0 | 0 | 0 | 0 | 0 | 0 | 10 |
| MIMAT<br>00046<br>87 | hsa-mi<br>R-371a<br>-5p | ENSG00<br>000146<br>648 | EGF<br>R | prote<br>in_co<br>ding | chr7 | 5527<br>3555 | 552<br>735<br>60 | 5527<br>3555 | 552<br>735<br>60 | + | 2 | 0 | AG01<br>-4, A<br>G02 | 1 | 0 | 0 | 0 | 0 | 0 | 0 | 0 | 4  |

|                      |                         |                         |          |                        |      |              |                  |              |                  |   |   |   |                      |   |   |   |   |   |   |   |    |
|----------------------|-------------------------|-------------------------|----------|------------------------|------|--------------|------------------|--------------|------------------|---|---|---|----------------------|---|---|---|---|---|---|---|----|
| MIMAT<br>00046<br>87 | hsa-mi<br>R-371a<br>-5p | ENSG00<br>000146<br>648 | EGF<br>R | prote<br>in_co<br>ding | chr7 | 5527<br>4255 | 552<br>742<br>60 | 5527<br>4255 | 552<br>742<br>60 | + | 2 | 0 | AG01<br>-4, A<br>G02 | 1 | 0 | 0 | 0 | 0 | 0 | 0 | 4  |
| MIMAT<br>00046<br>92 | hsa-mi<br>R-340-<br>5p  | ENSG00<br>000146<br>648 | EGF<br>R | prote<br>in_co<br>ding | chr7 | 5527<br>5551 | 552<br>755<br>56 | 5527<br>5529 | 552<br>755<br>57 | + | 1 | 0 | AG01<br>-4           | 0 | 0 | 1 | 1 | 0 | 0 | 0 | 7  |
| MIMAT<br>00046<br>92 | hsa-mi<br>R-340-<br>5p  | ENSG00<br>000146<br>648 | EGF<br>R | prote<br>in_co<br>ding | chr7 | 5527<br>7897 | 552<br>779<br>02 | 5527<br>7875 | 552<br>779<br>03 | + | 3 | 1 | AG01<br>-4, A<br>G02 | 0 | 0 | 1 | 1 | 0 | 0 | 0 | 7  |
| MIMAT<br>00046<br>92 | hsa-mi<br>R-340-<br>5p  | ENSG00<br>000146<br>648 | EGF<br>R | prote<br>in_co<br>ding | chr7 | 5527<br>7934 | 552<br>779<br>39 | 5527<br>7912 | 552<br>779<br>40 | + | 3 | 0 | AG01<br>-4, A<br>G02 | 0 | 0 | 1 | 1 | 0 | 0 | 0 | 7  |
| MIMAT<br>00046<br>92 | hsa-mi<br>R-340-<br>5p  | ENSG00<br>000146<br>648 | EGF<br>R | prote<br>in_co<br>ding | chr7 | 5527<br>9102 | 552<br>791<br>08 | 5527<br>9081 | 552<br>791<br>09 | + | 1 | 0 | AG01<br>-4           | 0 | 0 | 1 | 1 | 0 | 0 | 0 | 7  |
| MIMAT<br>00046<br>92 | hsa-mi<br>R-340-<br>5p  | ENSG00<br>000146<br>648 | EGF<br>R | prote<br>in_co<br>ding | chr7 | 5527<br>9192 | 552<br>791<br>97 | 5527<br>9170 | 552<br>792<br>07 | + | 1 | 0 | AG01<br>-4           | 0 | 0 | 1 | 2 | 0 | 0 | 0 | 7  |
| MIMAT<br>00046<br>92 | hsa-mi<br>R-340-<br>5p  | ENSG00<br>000146<br>648 | EGF<br>R | prote<br>in_co<br>ding | chr7 | 5527<br>9201 | 552<br>792<br>06 | 5527<br>9201 | 552<br>792<br>06 | + | 1 | 0 | AG01<br>-4           | 0 | 0 | 1 | 0 | 0 | 0 | 0 | 7  |
| MIMAT<br>00046<br>93 | hsa-mi<br>R-330-<br>5p  | ENSG00<br>000146<br>648 | EGF<br>R | prote<br>in_co<br>ding | chr7 | 5527<br>3772 | 552<br>737<br>77 | 5527<br>3772 | 552<br>737<br>77 | + | 1 | 0 | AG02                 | 1 | 0 | 0 | 0 | 0 | 0 | 0 | 7  |
| MIMAT<br>00046       | hsa-mi<br>R-151a        | ENSG00<br>000146        | EGF<br>R | prote<br>in_co         | chr7 | 5523<br>8407 | 552<br>384       | 5523<br>8407 | 552<br>384       | + | 2 | 0 | AG02                 | 1 | 0 | 1 | 0 | 0 | 0 | 0 | 11 |

|                      |                        |                         |          |                        |      |              |                  |              |                  |   |   |   |                      |   |   |   |   |   |   |   |   |    |
|----------------------|------------------------|-------------------------|----------|------------------------|------|--------------|------------------|--------------|------------------|---|---|---|----------------------|---|---|---|---|---|---|---|---|----|
| 97                   | -5p                    | 648                     |          | ding                   |      |              | 13               |              | 13               |   |   |   |                      |   |   |   |   |   |   |   |   |    |
| MIMAT<br>00047<br>48 | hsa-mi<br>R-423-<br>5p | ENSG00<br>000146<br>648 | EGF<br>R | prote<br>in_co<br>ding | chr7 | 5523<br>8531 | 552<br>385<br>37 | 5523<br>8530 | 552<br>385<br>37 | + | 2 | 0 | AG02                 | 1 | 0 | 1 | 0 | 0 | 0 | 0 | 0 | 10 |
| MIMAT<br>00047<br>48 | hsa-mi<br>R-423-<br>5p | ENSG00<br>000146<br>648 | EGF<br>R | prote<br>in_co<br>ding | chr7 | 5527<br>4466 | 552<br>744<br>71 | 5527<br>4466 | 552<br>744<br>71 | + | 2 | 0 | AG02                 | 1 | 0 | 0 | 0 | 0 | 0 | 0 | 0 | 10 |
| MIMAT<br>00047<br>63 | hsa-mi<br>R-488-<br>3p | ENSG00<br>000146<br>648 | EGF<br>R | prote<br>in_co<br>ding | chr7 | 5527<br>3572 | 552<br>735<br>77 | 5527<br>3550 | 552<br>735<br>78 | + | 2 | 0 | AG01<br>-4, A<br>G02 | 1 | 1 | 1 | 1 | 0 | 0 | 0 | 0 | 6  |
| MIMAT<br>00047<br>63 | hsa-mi<br>R-488-<br>3p | ENSG00<br>000146<br>648 | EGF<br>R | prote<br>in_co<br>ding | chr7 | 5527<br>5571 | 552<br>755<br>76 | 5527<br>5549 | 552<br>755<br>77 | + | 2 | 0 | AG01<br>-4           | 0 | 0 | 1 | 1 | 0 | 0 | 0 | 0 | 6  |
| MIMAT<br>00047<br>63 | hsa-mi<br>R-488-<br>3p | ENSG00<br>000146<br>648 | EGF<br>R | prote<br>in_co<br>ding | chr7 | 5527<br>7354 | 552<br>773<br>59 | 5527<br>7332 | 552<br>773<br>60 | + | 1 | 0 | AG01<br>-4           | 0 | 0 | 1 | 1 | 0 | 0 | 0 | 0 | 6  |
| MIMAT<br>00047<br>74 | hsa-mi<br>R-501-<br>3p | ENSG00<br>000146<br>648 | EGF<br>R | prote<br>in_co<br>ding | chr7 | 5527<br>5319 | 552<br>753<br>25 | 5527<br>5319 | 552<br>753<br>25 | + | 1 | 0 | AG02                 | 0 | 0 | 1 | 0 | 0 | 0 | 0 | 0 | 12 |
| MIMAT<br>00047<br>74 | hsa-mi<br>R-501-<br>3p | ENSG00<br>000146<br>648 | EGF<br>R | prote<br>in_co<br>ding | chr7 | 5527<br>9229 | 552<br>792<br>34 | 5527<br>9229 | 552<br>792<br>34 | + | 1 | 0 | AG01<br>-4           | 0 | 0 | 1 | 0 | 0 | 0 | 0 | 0 | 12 |
| MIMAT<br>00047<br>75 | hsa-mi<br>R-502-<br>3p | ENSG00<br>000146<br>648 | EGF<br>R | prote<br>in_co<br>ding | chr7 | 5527<br>5319 | 552<br>753<br>25 | 5527<br>5298 | 552<br>753<br>26 | + | 1 | 0 | AG02                 | 0 | 0 | 1 | 1 | 0 | 0 | 0 | 0 | 10 |
| MIMAT                | hsa-mi                 | ENSG00                  | EGF      | prote                  | chr7 | 5527         | 552              | 5527         | 552              | + | 1 | 0 | AG01                 | 0 | 0 | 1 | 1 | 0 | 0 | 0 | 0 | 10 |

|                      |                        |                         |          |                        |      |              |                  |              |                  |   |   |   |                      |   |   |   |   |   |   |   |    |
|----------------------|------------------------|-------------------------|----------|------------------------|------|--------------|------------------|--------------|------------------|---|---|---|----------------------|---|---|---|---|---|---|---|----|
| 00047<br>75          | R-502-<br>3p           | 000146<br>648           | R        | in_co<br>ding          |      | 9229         | 792<br>34        | 9207         | 792<br>35        |   |   |   | -4                   |   |   |   |   |   |   |   |    |
| MIMAT<br>00047<br>84 | hsa-mi<br>R-455-<br>3p | ENSG00<br>000146<br>648 | EGF<br>R | prote<br>in_co<br>ding | chr7 | 5523<br>8393 | 552<br>383<br>98 | 5523<br>8393 | 552<br>383<br>98 | + | 2 | 0 | AG02                 | 1 | 0 | 0 | 0 | 0 | 0 | 0 | 5  |
| MIMAT<br>00047<br>99 | hsa-mi<br>R-589-<br>5p | ENSG00<br>000146<br>648 | EGF<br>R | prote<br>in_co<br>ding | chr7 | 5527<br>4230 | 552<br>742<br>35 | 5527<br>4230 | 552<br>742<br>35 | + | 3 | 0 | AG02                 | 1 | 0 | 1 | 0 | 0 | 0 | 0 | 7  |
| MIMAT<br>00047<br>99 | hsa-mi<br>R-589-<br>5p | ENSG00<br>000146<br>648 | EGF<br>R | prote<br>in_co<br>ding | chr7 | 5527<br>5862 | 552<br>758<br>67 | 5527<br>5840 | 552<br>758<br>68 | + | 1 | 0 | AG02                 | 0 | 0 | 1 | 1 | 0 | 0 | 0 | 7  |
| MIMAT<br>00048<br>05 | hsa-mi<br>R-616-<br>3p | ENSG00<br>000146<br>648 | EGF<br>R | prote<br>in_co<br>ding | chr7 | 5527<br>4564 | 552<br>745<br>69 | 5527<br>4564 | 552<br>745<br>69 | + | 1 | 0 | AG02                 | 1 | 0 | 0 | 0 | 0 | 0 | 0 | 4  |
| MIMAT<br>00048<br>09 | hsa-mi<br>R-628-<br>5p | ENSG00<br>000146<br>648 | EGF<br>R | prote<br>in_co<br>ding | chr7 | 5527<br>4108 | 552<br>741<br>13 | 5527<br>4108 | 552<br>741<br>13 | + | 3 | 0 | AG01<br>-4, A<br>G02 | 1 | 0 | 0 | 0 | 0 | 0 | 0 | 10 |
| MIMAT<br>00048<br>09 | hsa-mi<br>R-628-<br>5p | ENSG00<br>000146<br>648 | EGF<br>R | prote<br>in_co<br>ding | chr7 | 5527<br>4167 | 552<br>741<br>72 | 5527<br>4167 | 552<br>741<br>72 | + | 4 | 0 | AG01<br>-4, A<br>G02 | 1 | 0 | 0 | 0 | 0 | 0 | 0 | 10 |
| MIMAT<br>00048<br>10 | hsa-mi<br>R-629-<br>5p | ENSG00<br>000146<br>648 | EGF<br>R | prote<br>in_co<br>ding | chr7 | 5527<br>4462 | 552<br>744<br>67 | 5527<br>4462 | 552<br>744<br>67 | + | 2 | 0 | AG02                 | 1 | 0 | 0 | 0 | 0 | 0 | 0 | 8  |
| MIMAT<br>00049<br>11 | hsa-mi<br>R-874-<br>3p | ENSG00<br>000146<br>648 | EGF<br>R | prote<br>in_co<br>ding | chr7 | 5527<br>4525 | 552<br>745<br>51 | 5527<br>4525 | 552<br>745<br>51 | + | 1 | 0 | AG02                 | 0 | 0 | 0 | 0 | 1 | 0 | 0 | 9  |

|                      |                        |                         |          |                        |      |              |                  |              |                  |   |   |   |                      |   |   |   |   |   |   |   |   |
|----------------------|------------------------|-------------------------|----------|------------------------|------|--------------|------------------|--------------|------------------|---|---|---|----------------------|---|---|---|---|---|---|---|---|
| MIMAT<br>00049<br>16 | hsa-mi<br>R-888-<br>5p | ENSG00<br>000146<br>648 | EGF<br>R | prote<br>in_co<br>ding | chr7 | 5527<br>4505 | 552<br>745<br>10 | 5527<br>4483 | 552<br>745<br>11 | + | 2 | 0 | AG02                 | 1 | 0 | 0 | 1 | 0 | 0 | 0 | 2 |
| MIMAT<br>00049<br>16 | hsa-mi<br>R-888-<br>5p | ENSG00<br>000146<br>648 | EGF<br>R | prote<br>in_co<br>ding | chr7 | 5527<br>9212 | 552<br>792<br>40 | 5527<br>9212 | 552<br>792<br>40 | + | 1 | 0 | AG01<br>-4           | 0 | 0 | 0 | 1 | 0 | 0 | 0 | 2 |
| MIMAT<br>00049<br>22 | hsa-mi<br>R-875-<br>5p | ENSG00<br>000146<br>648 | EGF<br>R | prote<br>in_co<br>ding | chr7 | 5527<br>3580 | 552<br>735<br>86 | 5527<br>3559 | 552<br>735<br>87 | + | 2 | 0 | AG01<br>-4, A<br>G02 | 1 | 0 | 1 | 1 | 1 | 0 | 1 | 6 |
| MIMAT<br>00049<br>24 | hsa-mi<br>R-876-<br>5p | ENSG00<br>000146<br>648 | EGF<br>R | prote<br>in_co<br>ding | chr7 | 5527<br>3336 | 552<br>733<br>41 | 5527<br>3314 | 552<br>733<br>42 | + | 3 | 0 | AG01<br>-4, A<br>G02 | 1 | 0 | 0 | 1 | 0 | 0 | 0 | 4 |
| MIMAT<br>00049<br>24 | hsa-mi<br>R-876-<br>5p | ENSG00<br>000146<br>648 | EGF<br>R | prote<br>in_co<br>ding | chr7 | 5527<br>7320 | 552<br>773<br>48 | 5527<br>7320 | 552<br>773<br>48 | + | 2 | 0 | AG01<br>-4, A<br>G02 | 0 | 0 | 0 | 1 | 0 | 0 | 0 | 4 |
| MIMAT<br>00049<br>24 | hsa-mi<br>R-876-<br>5p | ENSG00<br>000146<br>648 | EGF<br>R | prote<br>in_co<br>ding | chr7 | 5527<br>7791 | 552<br>778<br>19 | 5527<br>7791 | 552<br>778<br>19 | + | 2 | 0 | AG01<br>-4, A<br>G02 | 0 | 0 | 0 | 1 | 0 | 0 | 0 | 4 |
| MIMAT<br>00049<br>45 | hsa-mi<br>R-744-<br>5p | ENSG00<br>000146<br>648 | EGF<br>R | prote<br>in_co<br>ding | chr7 | 5523<br>8264 | 552<br>382<br>69 | 5523<br>8264 | 552<br>382<br>69 | + | 1 | 0 | AG02                 | 1 | 0 | 0 | 0 | 0 | 0 | 0 | 8 |
| MIMAT<br>00049<br>52 | hsa-mi<br>R-665        | ENSG00<br>000146<br>648 | EGF<br>R | prote<br>in_co<br>ding | chr7 | 5526<br>6469 | 552<br>664<br>91 | 5526<br>6469 | 552<br>664<br>91 | + | 1 | 0 | AG01<br>-4           | 0 | 1 | 0 | 0 | 0 | 0 | 0 | 0 |
| MIMAT<br>00049       | hsa-mi<br>R-665        | ENSG00<br>000146        | EGF<br>R | prote<br>in_co         | chr7 | 5527<br>3917 | 552<br>739       | 5527<br>3917 | 552<br>739       | + | 3 | 0 | AG01<br>-4, A        | 1 | 0 | 0 | 0 | 0 | 0 | 0 | 0 |

|                      |                        |                         |          |                        |      |              |                  |              |                  |   |   |   |                      |   |   |   |   |   |   |   |   |    |
|----------------------|------------------------|-------------------------|----------|------------------------|------|--------------|------------------|--------------|------------------|---|---|---|----------------------|---|---|---|---|---|---|---|---|----|
| 52                   |                        | 648                     |          | ding                   |      |              | 24               |              | 24               |   |   |   | G02                  |   |   |   |   |   |   |   |   |    |
| MIMAT<br>00049<br>53 | hsa-mi<br>R-873-<br>5p | ENSG00<br>000146<br>648 | EGF<br>R | prote<br>in_co<br>ding | chr7 | 5522<br>4596 | 552<br>246<br>01 | 5522<br>4596 | 552<br>246<br>01 | + | 1 | 0 | AG02                 | 1 | 0 | 0 | 0 | 0 | 0 | 0 | 0 | 5  |
| MIMAT<br>00049<br>53 | hsa-mi<br>R-873-<br>5p | ENSG00<br>000146<br>648 | EGF<br>R | prote<br>in_co<br>ding | chr7 | 5527<br>3918 | 552<br>739<br>23 | 5527<br>3918 | 552<br>739<br>23 | + | 3 | 0 | AG01<br>-4, A<br>G02 | 1 | 0 | 0 | 0 | 0 | 0 | 0 | 0 | 5  |
| MIMAT<br>00049<br>54 | hsa-mi<br>R-543        | ENSG00<br>000146<br>648 | EGF<br>R | prote<br>in_co<br>ding | chr7 | 5527<br>4909 | 552<br>749<br>14 | 5527<br>4909 | 552<br>749<br>14 | + | 1 | 0 | AG01<br>-4           | 1 | 0 | 0 | 0 | 0 | 0 | 0 | 0 | 1  |
| MIMAT<br>00049<br>57 | hsa-mi<br>R-760        | ENSG00<br>000146<br>648 | EGF<br>R | prote<br>in_co<br>ding | chr7 | 5523<br>8549 | 552<br>385<br>56 | 5523<br>8549 | 552<br>385<br>56 | + | 2 | 0 | AG02                 | 1 | 0 | 0 | 0 | 0 | 0 | 0 | 0 | 4  |
| MIMAT<br>00049<br>57 | hsa-mi<br>R-760        | ENSG00<br>000146<br>648 | EGF<br>R | prote<br>in_co<br>ding | chr7 | 5527<br>4954 | 552<br>749<br>60 | 5527<br>4954 | 552<br>749<br>60 | + | 1 | 0 | AG01<br>-4           | 1 | 0 | 1 | 0 | 0 | 0 | 0 | 0 | 4  |
| MIMAT<br>00049<br>85 | hsa-mi<br>R-942-<br>5p | ENSG00<br>000146<br>648 | EGF<br>R | prote<br>in_co<br>ding | chr7 | 5527<br>5516 | 552<br>755<br>21 | 5527<br>5516 | 552<br>755<br>21 | + | 1 | 0 | AG01<br>-4           | 0 | 0 | 1 | 0 | 0 | 0 | 0 | 0 | 11 |
| MIMAT<br>00049<br>85 | hsa-mi<br>R-942-<br>5p | ENSG00<br>000146<br>648 | EGF<br>R | prote<br>in_co<br>ding | chr7 | 5527<br>6298 | 552<br>763<br>04 | 5527<br>6298 | 552<br>763<br>04 | + | 1 | 0 | AG02                 | 0 | 0 | 1 | 0 | 0 | 0 | 0 | 0 | 11 |
| MIMAT<br>00049<br>87 | hsa-mi<br>R-944        | ENSG00<br>000146<br>648 | EGF<br>R | prote<br>in_co<br>ding | chr7 | 5523<br>8710 | 552<br>387<br>16 | 5523<br>8710 | 552<br>387<br>16 | + | 1 | 0 | AG02                 | 1 | 0 | 0 | 0 | 0 | 0 | 0 | 0 | 3  |
| MIMAT                | hsa-mi                 | ENSG00                  | EGF      | prote                  | chr7 | 5523         | 552              | 5523         | 552              | + | 2 | 0 | AG02                 | 1 | 0 | 0 | 0 | 0 | 0 | 0 | 0 | 0  |

|                      |                         |                         |          |                        |      |              |                  |              |                  |   |   |   |                      |   |   |   |   |   |   |   |   |   |
|----------------------|-------------------------|-------------------------|----------|------------------------|------|--------------|------------------|--------------|------------------|---|---|---|----------------------|---|---|---|---|---|---|---|---|---|
| 00054<br>54          | R-519b<br>-5p           | 000146<br>648           | R        | in_co<br>ding          |      | 8548         | 385<br>53        | 8548         | 385<br>53        |   |   |   |                      |   |   |   |   |   |   |   |   |   |
| MIMAT<br>00054<br>55 | hsa-mi<br>R-520c<br>-5p | ENSG00<br>000146<br>648 | EGF<br>R | prote<br>in_co<br>ding | chr7 | 5523<br>8548 | 552<br>385<br>53 | 5523<br>8548 | 552<br>385<br>53 | + | 2 | 0 | AG02                 | 1 | 0 | 0 | 0 | 0 | 0 | 0 | 0 | 0 |
| MIMAT<br>00054<br>56 | hsa-mi<br>R-518d<br>-5p | ENSG00<br>000146<br>648 | EGF<br>R | prote<br>in_co<br>ding | chr7 | 5523<br>8548 | 552<br>385<br>53 | 5523<br>8548 | 552<br>385<br>53 | + | 2 | 0 | AG02                 | 1 | 0 | 0 | 0 | 0 | 0 | 0 | 0 | 1 |
| MIMAT<br>00057<br>92 | hsa-mi<br>R-320b        | ENSG00<br>000146<br>648 | EGF<br>R | prote<br>in_co<br>ding | chr7 | 5522<br>1790 | 552<br>218<br>18 | 5522<br>1790 | 552<br>218<br>18 | + | 2 | 0 | AG01<br>-4, A<br>G02 | 0 | 0 | 0 | 1 | 0 | 0 | 0 | 0 | 6 |
| MIMAT<br>00057<br>92 | hsa-mi<br>R-320b        | ENSG00<br>000146<br>648 | EGF<br>R | prote<br>in_co<br>ding | chr7 | 5527<br>4415 | 552<br>744<br>20 | 5527<br>4393 | 552<br>744<br>21 | + | 6 | 0 | AG01<br>-4, A<br>G02 | 1 | 0 | 0 | 1 | 0 | 0 | 0 | 0 | 6 |
| MIMAT<br>00057<br>92 | hsa-mi<br>R-320b        | ENSG00<br>000146<br>648 | EGF<br>R | prote<br>in_co<br>ding | chr7 | 5527<br>7366 | 552<br>773<br>94 | 5527<br>7366 | 552<br>773<br>94 | + | 1 | 0 | AG01<br>-4           | 0 | 0 | 0 | 1 | 0 | 0 | 0 | 0 | 6 |
| MIMAT<br>00057<br>92 | hsa-mi<br>R-320b        | ENSG00<br>000146<br>648 | EGF<br>R | prote<br>in_co<br>ding | chr7 | 5527<br>9078 | 552<br>791<br>06 | 5527<br>9078 | 552<br>791<br>06 | + | 1 | 0 | AG01<br>-4           | 0 | 0 | 0 | 1 | 0 | 0 | 0 | 0 | 6 |
| MIMAT<br>00057<br>93 | hsa-mi<br>R-320c        | ENSG00<br>000146<br>648 | EGF<br>R | prote<br>in_co<br>ding | chr7 | 5522<br>1790 | 552<br>218<br>18 | 5522<br>1790 | 552<br>218<br>18 | + | 2 | 0 | AG01<br>-4, A<br>G02 | 0 | 0 | 0 | 1 | 0 | 0 | 0 | 0 | 1 |
| MIMAT<br>00057<br>93 | hsa-mi<br>R-320c        | ENSG00<br>000146<br>648 | EGF<br>R | prote<br>in_co<br>ding | chr7 | 5527<br>4415 | 552<br>744<br>20 | 5527<br>4393 | 552<br>744<br>21 | + | 6 | 0 | AG01<br>-4, A<br>G02 | 1 | 0 | 0 | 1 | 0 | 0 | 0 | 0 | 1 |

|              |                 |                 |      |                |      |          |          |          |          |   |   |   |              |   |   |   |   |   |   |   |   |
|--------------|-----------------|-----------------|------|----------------|------|----------|----------|----------|----------|---|---|---|--------------|---|---|---|---|---|---|---|---|
| MIMAT0005793 | hsa-miR-320c    | ENSG00000146648 | EGFR | protein_coding | chr7 | 55277366 | 55277394 | 55277366 | 55277394 | + | 1 | 0 | AG01-4       | 0 | 0 | 0 | 1 | 0 | 0 | 0 | 1 |
| MIMAT0005793 | hsa-miR-320c    | ENSG00000146648 | EGFR | protein_coding | chr7 | 55279078 | 55279106 | 55279078 | 55279106 | + | 1 | 0 | AG01-4       | 0 | 0 | 0 | 1 | 0 | 0 | 0 | 1 |
| MIMAT0005794 | hsa-miR-1296-5p | ENSG00000146648 | EGFR | protein_coding | chr7 | 55273329 | 55273334 | 55273329 | 55273334 | + | 2 | 0 | AG01-4, AG02 | 1 | 0 | 0 | 0 | 0 | 0 | 0 | 8 |
| MIMAT0005795 | hsa-miR-1323    | ENSG00000146648 | EGFR | protein_coding | chr7 | 55273428 | 55273433 | 55273406 | 55273434 | + | 6 | 0 | AG01-4, AG02 | 1 | 0 | 0 | 1 | 0 | 0 | 0 | 1 |
| MIMAT0005795 | hsa-miR-1323    | ENSG00000146648 | EGFR | protein_coding | chr7 | 55274065 | 55274070 | 55274043 | 55274071 | + | 5 | 0 | AG01-4, AG02 | 1 | 0 | 0 | 1 | 0 | 0 | 0 | 1 |
| MIMAT0005795 | hsa-miR-1323    | ENSG00000146648 | EGFR | protein_coding | chr7 | 55279119 | 55279147 | 55279119 | 55279147 | + | 1 | 0 | AG01-4       | 0 | 0 | 0 | 1 | 0 | 0 | 0 | 1 |
| MIMAT0005800 | hsa-miR-1298-5p | ENSG00000146648 | EGFR | protein_coding | chr7 | 55274562 | 55274568 | 55274562 | 55274568 | + | 1 | 0 | AG02         | 1 | 0 | 0 | 0 | 0 | 0 | 0 | 4 |
| MIMAT0005878 | hsa-miR-1287-5p | ENSG00000146648 | EGFR | protein_coding | chr7 | 55273534 | 55273540 | 55273513 | 55273541 | + | 4 | 0 | AG01-4, AG02 | 1 | 0 | 1 | 1 | 0 | 0 | 0 | 8 |
| MIMAT00058   | hsa-miR-1287    | ENSG00000146    | EGFR | protein_coding | chr7 | 55274147 | 55274174 | 55274125 | 55274174 | + | 2 | 0 | AG01-4       | 1 | 0 | 0 | 1 | 0 | 0 | 0 | 8 |

|                      |                         |                         |          |                        |      |              |                  |              |                  |   |   |   |                      |   |   |   |   |   |   |   |   |   |
|----------------------|-------------------------|-------------------------|----------|------------------------|------|--------------|------------------|--------------|------------------|---|---|---|----------------------|---|---|---|---|---|---|---|---|---|
| 78                   | -5p                     | 648                     |          | ding                   |      |              | 52               |              | 53               |   |   |   |                      |   |   |   |   |   |   |   |   |   |
| MIMAT<br>00058<br>78 | hsa-mi<br>R-1287<br>-5p | ENSG00<br>000146<br>648 | EGF<br>R | prote<br>in_co<br>ding | chr7 | 5527<br>6360 | 552<br>763<br>88 | 5527<br>6360 | 552<br>763<br>88 | + | 1 | 0 | AG01<br>-4           | 0 | 0 | 0 | 1 | 0 | 0 | 0 | 0 | 8 |
| MIMAT<br>00058<br>85 | hsa-mi<br>R-1295<br>a   | ENSG00<br>000146<br>648 | EGF<br>R | prote<br>in_co<br>ding | chr7 | 5527<br>6648 | 552<br>766<br>53 | 5527<br>6648 | 552<br>766<br>53 | + | 1 | 0 | AG01                 | 0 | 0 | 1 | 0 | 0 | 0 | 0 | 0 | 0 |
| MIMAT<br>00058<br>85 | hsa-mi<br>R-1295<br>a   | ENSG00<br>000146<br>648 | EGF<br>R | prote<br>in_co<br>ding | chr7 | 5527<br>8297 | 552<br>783<br>02 | 5527<br>8297 | 552<br>783<br>02 | + | 1 | 0 | AG02                 | 0 | 0 | 1 | 0 | 0 | 0 | 0 | 0 | 0 |
| MIMAT<br>00059<br>03 | hsa-mi<br>R-1251<br>-5p | ENSG00<br>000146<br>648 | EGF<br>R | prote<br>in_co<br>ding | chr7 | 5523<br>8549 | 552<br>385<br>54 | 5523<br>8549 | 552<br>385<br>54 | + | 2 | 0 | AG02                 | 1 | 0 | 0 | 0 | 0 | 0 | 0 | 0 | 9 |
| MIMAT<br>00059<br>19 | hsa-mi<br>R-548o<br>-3p | ENSG00<br>000146<br>648 | EGF<br>R | prote<br>in_co<br>ding | chr7 | 5527<br>3428 | 552<br>734<br>33 | 5527<br>3406 | 552<br>734<br>34 | + | 6 | 0 | AG01<br>-4, A<br>G02 | 1 | 0 | 0 | 1 | 0 | 0 | 0 | 0 | 5 |
| MIMAT<br>00059<br>19 | hsa-mi<br>R-548o<br>-3p | ENSG00<br>000146<br>648 | EGF<br>R | prote<br>in_co<br>ding | chr7 | 5527<br>4065 | 552<br>740<br>70 | 5527<br>4043 | 552<br>740<br>71 | + | 5 | 0 | AG01<br>-4, A<br>G02 | 1 | 0 | 0 | 1 | 0 | 0 | 0 | 0 | 5 |
| MIMAT<br>00059<br>19 | hsa-mi<br>R-548o<br>-3p | ENSG00<br>000146<br>648 | EGF<br>R | prote<br>in_co<br>ding | chr7 | 5527<br>9119 | 552<br>791<br>47 | 5527<br>9119 | 552<br>791<br>47 | + | 1 | 0 | AG01<br>-4           | 0 | 0 | 0 | 1 | 0 | 0 | 0 | 0 | 5 |
| MIMAT<br>00059<br>23 | hsa-mi<br>R-1269<br>a   | ENSG00<br>000146<br>648 | EGF<br>R | prote<br>in_co<br>ding | chr7 | 5523<br>8501 | 552<br>385<br>07 | 5523<br>8501 | 552<br>385<br>07 | + | 1 | 0 | AG02                 | 1 | 0 | 0 | 0 | 0 | 0 | 0 | 0 | 6 |
| MIMAT                | hsa-mi                  | ENSG00                  | EGF      | prote                  | chr7 | 5527         | 552              | 5527         | 552              | + | 3 | 0 | AG01                 | 1 | 0 | 1 | 1 | 0 | 0 | 0 | 0 | 1 |

|                      |                         |                         |          |                        |      |              |                  |              |                  |   |   |   |                      |   |   |   |   |   |   |   |    |
|----------------------|-------------------------|-------------------------|----------|------------------------|------|--------------|------------------|--------------|------------------|---|---|---|----------------------|---|---|---|---|---|---|---|----|
| 00059<br>30          | R-1276                  | 000146<br>648           | R        | in_co<br>ding          |      | 3345         | 733<br>50        | 3323         | 733<br>51        |   |   |   | -4, A<br>G02         |   |   |   |   |   |   |   |    |
| MIMAT<br>00059<br>30 | hsa-mi<br>R-1276        | ENSG00<br>000146<br>648 | EGF<br>R | prote<br>in_co<br>ding | chr7 | 5527<br>7352 | 552<br>773<br>57 | 5527<br>7352 | 552<br>773<br>57 | + | 1 | 0 | AG01<br>-4           | 0 | 0 | 1 | 0 | 0 | 0 | 0 | 1  |
| MIMAT<br>00059<br>30 | hsa-mi<br>R-1276        | ENSG00<br>000146<br>648 | EGF<br>R | prote<br>in_co<br>ding | chr7 | 5527<br>9188 | 552<br>791<br>93 | 5527<br>9166 | 552<br>791<br>94 | + | 1 | 0 | AG01<br>-4           | 0 | 0 | 1 | 1 | 0 | 0 | 0 | 1  |
| MIMAT<br>00059<br>31 | hsa-mi<br>R-302e        | ENSG00<br>000146<br>648 | EGF<br>R | prote<br>in_co<br>ding | chr7 | 5527<br>4521 | 552<br>745<br>27 | 5527<br>4500 | 552<br>745<br>28 | + | 1 | 2 | AG02                 | 1 | 0 | 1 | 1 | 1 | 0 | 0 | 0  |
| MIMAT<br>00059<br>31 | hsa-mi<br>R-302e        | ENSG00<br>000146<br>648 | EGF<br>R | prote<br>in_co<br>ding | chr7 | 5527<br>7884 | 552<br>778<br>90 | 5527<br>7863 | 552<br>778<br>91 | + | 2 | 0 | AG01<br>-4, A<br>G02 | 0 | 0 | 1 | 1 | 0 | 0 | 1 | 0  |
| MIMAT<br>00059<br>36 | hsa-mi<br>R-1278        | ENSG00<br>000146<br>648 | EGF<br>R | prote<br>in_co<br>ding | chr7 | 5527<br>3459 | 552<br>734<br>64 | 5527<br>3459 | 552<br>734<br>64 | + | 5 | 0 | AG01<br>-4, A<br>G02 | 1 | 0 | 0 | 0 | 0 | 0 | 0 | 3  |
| MIMAT<br>00059<br>44 | hsa-mi<br>R-1252<br>-5p | ENSG00<br>000146<br>648 | EGF<br>R | prote<br>in_co<br>ding | chr7 | 5521<br>0097 | 552<br>101<br>25 | 5521<br>0097 | 552<br>101<br>25 | + | 1 | 0 | AG02                 | 0 | 0 | 0 | 1 | 0 | 0 | 0 | 5  |
| MIMAT<br>00059<br>44 | hsa-mi<br>R-1252<br>-5p | ENSG00<br>000146<br>648 | EGF<br>R | prote<br>in_co<br>ding | chr7 | 5523<br>8523 | 552<br>385<br>29 | 5523<br>8523 | 552<br>385<br>29 | + | 2 | 0 | AG02                 | 1 | 0 | 1 | 0 | 0 | 0 | 0 | 5  |
| MIMAT<br>00059<br>51 | hsa-mi<br>R-1307<br>-3p | ENSG00<br>000146<br>648 | EGF<br>R | prote<br>in_co<br>ding | chr7 | 5522<br>9268 | 552<br>292<br>88 | 5522<br>9268 | 552<br>292<br>88 | + | 2 | 0 | AG01<br>-4, A<br>G02 | 0 | 1 | 0 | 0 | 0 | 0 | 0 | 11 |

|                      |                         |                         |          |                        |      |              |                  |              |                  |   |   |   |                      |   |   |   |   |   |   |   |   |
|----------------------|-------------------------|-------------------------|----------|------------------------|------|--------------|------------------|--------------|------------------|---|---|---|----------------------|---|---|---|---|---|---|---|---|
| MIMAT<br>00067<br>64 | hsa-mi<br>R-320d        | ENSG00<br>000146<br>648 | EGF<br>R | prote<br>in_co<br>ding | chr7 | 5522<br>1790 | 552<br>218<br>18 | 5522<br>1790 | 552<br>218<br>18 | + | 2 | 0 | AG01<br>-4, A<br>G02 | 0 | 0 | 0 | 1 | 0 | 0 | 0 | 1 |
| MIMAT<br>00067<br>64 | hsa-mi<br>R-320d        | ENSG00<br>000146<br>648 | EGF<br>R | prote<br>in_co<br>ding | chr7 | 5527<br>4415 | 552<br>744<br>20 | 5527<br>4393 | 552<br>744<br>21 | + | 6 | 0 | AG01<br>-4, A<br>G02 | 1 | 0 | 0 | 1 | 0 | 0 | 0 | 1 |
| MIMAT<br>00067<br>64 | hsa-mi<br>R-320d        | ENSG00<br>000146<br>648 | EGF<br>R | prote<br>in_co<br>ding | chr7 | 5527<br>7366 | 552<br>773<br>94 | 5527<br>7366 | 552<br>773<br>94 | + | 1 | 0 | AG01<br>-4           | 0 | 0 | 0 | 1 | 0 | 0 | 0 | 1 |
| MIMAT<br>00067<br>64 | hsa-mi<br>R-320d        | ENSG00<br>000146<br>648 | EGF<br>R | prote<br>in_co<br>ding | chr7 | 5527<br>9078 | 552<br>791<br>06 | 5527<br>9078 | 552<br>791<br>06 | + | 1 | 0 | AG01<br>-4           | 0 | 0 | 0 | 1 | 0 | 0 | 0 | 1 |
| MIMAT<br>00078<br>88 | hsa-mi<br>R-1913        | ENSG00<br>000146<br>648 | EGF<br>R | prote<br>in_co<br>ding | chr7 | 5527<br>5951 | 552<br>759<br>56 | 5527<br>5951 | 552<br>759<br>56 | + | 2 | 0 | AG01<br>-4           | 0 | 0 | 1 | 0 | 0 | 0 | 0 | 1 |
| MIMAT<br>00078<br>88 | hsa-mi<br>R-1913        | ENSG00<br>000146<br>648 | EGF<br>R | prote<br>in_co<br>ding | chr7 | 5527<br>7769 | 552<br>777<br>75 | 5527<br>7769 | 552<br>777<br>75 | + | 1 | 0 | AG01<br>-4           | 0 | 0 | 1 | 0 | 0 | 0 | 0 | 1 |
| MIMAT<br>00102<br>14 | hsa-mi<br>R-151b        | ENSG00<br>000146<br>648 | EGF<br>R | prote<br>in_co<br>ding | chr7 | 5523<br>8407 | 552<br>384<br>13 | 5523<br>8407 | 552<br>384<br>13 | + | 2 | 0 | AG02                 | 0 | 0 | 1 | 0 | 0 | 0 | 0 | 6 |
| MIMAT<br>00111<br>57 | hsa-mi<br>R-2114<br>-3p | ENSG00<br>000146<br>648 | EGF<br>R | prote<br>in_co<br>ding | chr7 | 5527<br>4258 | 552<br>742<br>64 | 5527<br>4258 | 552<br>742<br>64 | + | 2 | 0 | AG01<br>-4, A<br>G02 | 0 | 0 | 1 | 0 | 0 | 0 | 0 | 4 |
| MIMAT<br>00149       | hsa-mi<br>R-3118        | ENSG00<br>000146        | EGF<br>R | prote<br>in_co         | chr7 | 5527<br>4890 | 552<br>748       | 5527<br>4869 | 552<br>748       | + | 1 | 1 | AG01<br>-4           | 0 | 0 | 1 | 1 | 0 | 0 | 0 | 0 |

|                      |                         |                         |          |                        |      |              |                  |              |                  |   |   |   |                      |   |   |   |   |   |   |   |   |   |
|----------------------|-------------------------|-------------------------|----------|------------------------|------|--------------|------------------|--------------|------------------|---|---|---|----------------------|---|---|---|---|---|---|---|---|---|
| 80                   |                         | 648                     |          | ding                   |      |              | 96               |              | 97               |   |   |   |                      |   |   |   |   |   |   |   |   |   |
| MIMAT<br>00149<br>80 | hsa-mi<br>R-3118        | ENSG00<br>000146<br>648 | EGF<br>R | prote<br>in_co<br>ding | chr7 | 5527<br>5395 | 552<br>754<br>01 | 5527<br>5374 | 552<br>754<br>02 | + | 1 | 0 | AG02                 | 0 | 0 | 1 | 1 | 0 | 0 | 0 | 0 | 0 |
| MIMAT<br>00149<br>80 | hsa-mi<br>R-3118        | ENSG00<br>000146<br>648 | EGF<br>R | prote<br>in_co<br>ding | chr7 | 5527<br>5702 | 552<br>757<br>07 | 5527<br>5680 | 552<br>757<br>08 | + | 3 | 0 | AG01<br>-4, A<br>G02 | 0 | 0 | 1 | 1 | 0 | 0 | 0 | 0 | 0 |
| MIMAT<br>00149<br>89 | hsa-mi<br>R-3126<br>-5p | ENSG00<br>000146<br>648 | EGF<br>R | prote<br>in_co<br>ding | chr7 | 5527<br>4440 | 552<br>744<br>45 | 5527<br>4440 | 552<br>744<br>45 | + | 3 | 0 | AG01<br>-4, A<br>G02 | 0 | 0 | 1 | 0 | 0 | 0 | 0 | 0 | 0 |
| MIMAT<br>00149<br>90 | hsa-mi<br>R-3127<br>-5p | ENSG00<br>000146<br>648 | EGF<br>R | prote<br>in_co<br>ding | chr7 | 5527<br>5334 | 552<br>753<br>39 | 5527<br>5334 | 552<br>753<br>39 | + | 1 | 0 | AG02                 | 0 | 0 | 1 | 0 | 0 | 0 | 0 | 0 | 7 |
| MIMAT<br>00149<br>90 | hsa-mi<br>R-3127<br>-5p | ENSG00<br>000146<br>648 | EGF<br>R | prote<br>in_co<br>ding | chr7 | 5527<br>6001 | 552<br>760<br>07 | 5527<br>6001 | 552<br>760<br>07 | + | 2 | 0 | AG01<br>-4           | 0 | 0 | 1 | 0 | 0 | 0 | 0 | 0 | 7 |
| MIMAT<br>00149<br>90 | hsa-mi<br>R-3127<br>-5p | ENSG00<br>000146<br>648 | EGF<br>R | prote<br>in_co<br>ding | chr7 | 5527<br>6037 | 552<br>760<br>42 | 5527<br>6037 | 552<br>760<br>42 | + | 1 | 0 | AG01<br>-4           | 0 | 0 | 1 | 0 | 0 | 0 | 0 | 0 | 7 |
| MIMAT<br>00150<br>08 | hsa-mi<br>R-3140<br>-3p | ENSG00<br>000146<br>648 | EGF<br>R | prote<br>in_co<br>ding | chr7 | 5527<br>4411 | 552<br>744<br>17 | 5527<br>4390 | 552<br>744<br>18 | + | 6 | 0 | AG01<br>-4, A<br>G02 | 0 | 0 | 1 | 1 | 0 | 0 | 0 | 0 | 3 |
| MIMAT<br>00150<br>08 | hsa-mi<br>R-3140<br>-3p | ENSG00<br>000146<br>648 | EGF<br>R | prote<br>in_co<br>ding | chr7 | 5527<br>7870 | 552<br>778<br>75 | 5527<br>7848 | 552<br>778<br>76 | + | 2 | 0 | AG01<br>-4, A<br>G02 | 0 | 0 | 1 | 1 | 0 | 0 | 0 | 0 | 3 |
| MIMAT                | hsa-mi                  | ENSG00                  | EGF      | prote                  | chr7 | 5527         | 552              | 5527         | 552              | + | 1 | 0 | AG01                 | 0 | 0 | 1 | 1 | 0 | 0 | 0 | 0 | 3 |

|              |                 |                 |      |                |      |          |          |          |          |   |   |   |              |   |   |   |   |   |   |   |   |
|--------------|-----------------|-----------------|------|----------------|------|----------|----------|----------|----------|---|---|---|--------------|---|---|---|---|---|---|---|---|
| 0015008      | R-3140-3p       | 000146648       | R    | in_coding      |      | 9176     | 79181    | 9154     | 79182    |   |   |   | -4           |   |   |   |   |   |   |   |   |
| MIMAT0015011 | hsa-miR-3142    | ENSG00000146648 | EGFR | protein_coding | chr7 | 55273838 | 55273844 | 55273838 | 55273844 | + | 2 | 0 | AG02         | 0 | 0 | 1 | 0 | 0 | 0 | 0 | 1 |
| MIMAT0015011 | hsa-miR-3142    | ENSG00000146648 | EGFR | protein_coding | chr7 | 55275359 | 55275364 | 55275359 | 55275364 | + | 1 | 0 | AG02         | 0 | 0 | 1 | 0 | 0 | 0 | 0 | 1 |
| MIMAT0015011 | hsa-miR-3142    | ENSG00000146648 | EGFR | protein_coding | chr7 | 55278296 | 55278301 | 55278296 | 55278301 | + | 1 | 0 | AG02         | 0 | 0 | 1 | 0 | 0 | 0 | 0 | 1 |
| MIMAT0015015 | hsa-miR-3144-3p | ENSG00000146648 | EGFR | protein_coding | chr7 | 55273581 | 55273587 | 55273560 | 55273588 | + | 2 | 0 | AG01-4, AG02 | 0 | 0 | 1 | 1 | 0 | 0 | 0 | 1 |
| MIMAT0015037 | hsa-miR-3163    | ENSG00000146648 | EGFR | protein_coding | chr7 | 55275528 | 55275556 | 55275528 | 55275556 | + | 1 | 0 | AG01-4       | 0 | 0 | 0 | 1 | 0 | 0 | 0 | 2 |
| MIMAT0015037 | hsa-miR-3163    | ENSG00000146648 | EGFR | protein_coding | chr7 | 55277254 | 55277282 | 55277254 | 55277282 | + | 2 | 0 | AG01-4, AG02 | 0 | 0 | 0 | 1 | 0 | 0 | 0 | 2 |
| MIMAT0015037 | hsa-miR-3163    | ENSG00000146648 | EGFR | protein_coding | chr7 | 55277911 | 55277933 | 55277905 | 55277939 | + | 3 | 0 | AG01-4, AG02 | 0 | 0 | 0 | 2 | 0 | 0 | 0 | 2 |
| MIMAT0015037 | hsa-miR-3163    | ENSG00000146648 | EGFR | protein_coding | chr7 | 55279178 | 55279197 | 55279169 | 55279206 | + | 1 | 0 | AG01-4       | 0 | 0 | 0 | 2 | 0 | 0 | 0 | 2 |

|              |                 |                 |      |                |      |          |          |          |          |   |   |   |              |   |   |   |   |   |   |   |   |
|--------------|-----------------|-----------------|------|----------------|------|----------|----------|----------|----------|---|---|---|--------------|---|---|---|---|---|---|---|---|
| MIMAT0015038 | hsa-miR-3164    | ENSG00000146648 | EGFR | protein_coding | chr7 | 55274891 | 55274896 | 55274891 | 55274896 | + | 1 | 0 | AG01-4       | 0 | 0 | 1 | 0 | 0 | 0 | 0 | 4 |
| MIMAT0015038 | hsa-miR-3164    | ENSG00000146648 | EGFR | protein_coding | chr7 | 55275396 | 55275401 | 55275396 | 55275401 | + | 1 | 0 | AG02         | 0 | 0 | 1 | 0 | 0 | 0 | 0 | 4 |
| MIMAT0015038 | hsa-miR-3164    | ENSG00000146648 | EGFR | protein_coding | chr7 | 55275702 | 55275707 | 55275702 | 55275707 | + | 2 | 0 | AG02         | 0 | 0 | 1 | 0 | 0 | 0 | 0 | 4 |
| MIMAT0015049 | hsa-miR-1193    | ENSG00000146648 | EGFR | protein_coding | chr7 | 55273382 | 55273387 | 55273382 | 55273387 | + | 3 | 0 | AG01-4, AG02 | 0 | 0 | 1 | 0 | 0 | 0 | 0 | 1 |
| MIMAT0015049 | hsa-miR-1193    | ENSG00000146648 | EGFR | protein_coding | chr7 | 55274831 | 55274836 | 55274831 | 55274836 | + | 1 | 0 | AG01-4       | 0 | 0 | 1 | 0 | 0 | 0 | 0 | 1 |
| MIMAT0015049 | hsa-miR-1193    | ENSG00000146648 | EGFR | protein_coding | chr7 | 55276033 | 55276038 | 55276033 | 55276038 | + | 1 | 0 | AG01-4       | 0 | 0 | 1 | 0 | 0 | 0 | 0 | 1 |
| MIMAT0015064 | hsa-miR-3184-5p | ENSG00000146648 | EGFR | protein_coding | chr7 | 55238531 | 55238537 | 55238531 | 55238537 | + | 2 | 0 | AG02         | 0 | 0 | 1 | 0 | 0 | 0 | 0 | 3 |
| MIMAT0017992 | hsa-miR-3614-5p | ENSG00000146648 | EGFR | protein_coding | chr7 | 55229291 | 55229310 | 55229291 | 55229310 | + | 1 | 0 | AG01-4       | 0 | 1 | 0 | 0 | 0 | 0 | 0 | 3 |
| MIMAT00180   | hsa-miR-3622    | ENSG00000146    | EGFR | protein_coding | chr7 | 55273394 | 55273473 | 55273394 | 55273473 | + | 4 | 0 | AG01-4, A    | 0 | 0 | 1 | 0 | 0 | 0 | 0 | 0 |

|                      |                          |                         |          |                        |      |              |                  |              |                  |   |   |   |                      |   |   |   |   |   |   |   |   |   |
|----------------------|--------------------------|-------------------------|----------|------------------------|------|--------------|------------------|--------------|------------------|---|---|---|----------------------|---|---|---|---|---|---|---|---|---|
| 05                   | b-5p                     | 648                     |          | ding                   |      |              | 00               |              | 00               |   |   |   | G02                  |   |   |   |   |   |   |   |   |   |
| MIMAT<br>00180<br>05 | hsa-mi<br>R-3622<br>b-5p | ENSG00<br>000146<br>648 | EGF<br>R | prote<br>in_co<br>ding | chr7 | 5527<br>6272 | 552<br>762<br>78 | 5527<br>6272 | 552<br>762<br>78 | + | 1 | 0 | AG02                 | 0 | 0 | 1 | 0 | 0 | 0 | 0 | 0 | 0 |
| MIMAT<br>00180<br>05 | hsa-mi<br>R-3622<br>b-5p | ENSG00<br>000146<br>648 | EGF<br>R | prote<br>in_co<br>ding | chr7 | 5527<br>7824 | 552<br>778<br>29 | 5527<br>7824 | 552<br>778<br>29 | + | 2 | 0 | AG01<br>-4, A<br>G02 | 0 | 0 | 1 | 0 | 0 | 0 | 0 | 0 | 0 |
| MIMAT<br>00181<br>09 | hsa-mi<br>R-3681<br>-3p  | ENSG00<br>000146<br>648 | EGF<br>R | prote<br>in_co<br>ding | chr7 | 5527<br>3510 | 552<br>735<br>16 | 5527<br>3510 | 552<br>735<br>16 | + | 4 | 0 | AG01<br>-4, A<br>G02 | 0 | 0 | 0 | 0 | 0 | 0 | 1 | 0 | 0 |
| MIMAT<br>00181<br>19 | hsa-mi<br>R-3690         | ENSG00<br>000146<br>648 | EGF<br>R | prote<br>in_co<br>ding | chr7 | 5527<br>4444 | 552<br>744<br>49 | 5527<br>4444 | 552<br>744<br>49 | + | 2 | 0 | AG02                 | 0 | 0 | 1 | 0 | 0 | 0 | 0 | 0 | 1 |
| MIMAT<br>00181<br>19 | hsa-mi<br>R-3690         | ENSG00<br>000146<br>648 | EGF<br>R | prote<br>in_co<br>ding | chr7 | 5527<br>6338 | 552<br>763<br>44 | 5527<br>6338 | 552<br>763<br>44 | + | 1 | 0 | AG01<br>-4           | 0 | 0 | 1 | 0 | 0 | 0 | 0 | 0 | 1 |
| MIMAT<br>00181<br>92 | hsa-mi<br>R-3918         | ENSG00<br>000146<br>648 | EGF<br>R | prote<br>in_co<br>ding | chr7 | 5527<br>4759 | 552<br>747<br>64 | 5527<br>4759 | 552<br>747<br>64 | + | 1 | 0 | AG02                 | 0 | 0 | 1 | 0 | 0 | 0 | 0 | 0 | 2 |
| MIMAT<br>00181<br>92 | hsa-mi<br>R-3918         | ENSG00<br>000146<br>648 | EGF<br>R | prote<br>in_co<br>ding | chr7 | 5527<br>6001 | 552<br>760<br>06 | 5527<br>6001 | 552<br>760<br>06 | + | 2 | 0 | AG01<br>-4           | 0 | 0 | 1 | 0 | 0 | 0 | 0 | 0 | 2 |
| MIMAT<br>00181<br>94 | hsa-mi<br>R-3150<br>b-3p | ENSG00<br>000146<br>648 | EGF<br>R | prote<br>in_co<br>ding | chr7 | 5526<br>6463 | 552<br>664<br>83 | 5526<br>6463 | 552<br>664<br>83 | + | 1 | 0 | AG01<br>-4           | 0 | 1 | 0 | 0 | 0 | 0 | 0 | 0 | 2 |
| MIMAT                | hsa-mi                   | ENSG00                  | EGF      | prote                  | chr7 | 5527         | 552              | 5527         | 552              | + | 4 | 0 | AG01                 | 0 | 0 | 1 | 0 | 0 | 0 | 0 | 0 | 2 |

|                      |                       |                         |          |                        |      |              |                  |              |                  |   |   |   |                      |   |   |   |   |   |   |   |   |
|----------------------|-----------------------|-------------------------|----------|------------------------|------|--------------|------------------|--------------|------------------|---|---|---|----------------------|---|---|---|---|---|---|---|---|
| 00189<br>43          | R-4428                | 000146<br>648           | R        | in_co<br>ding          |      | 4331         | 743<br>37        | 4331         | 743<br>37        |   |   |   | -4, A<br>G02         |   |   |   |   |   |   |   |   |
| MIMAT<br>00189<br>43 | hsa-mi<br>R-4428      | ENSG00<br>000146<br>648 | EGF<br>R | prote<br>in_co<br>ding | chr7 | 5527<br>4393 | 552<br>743<br>99 | 5527<br>4393 | 552<br>743<br>99 | + | 6 | 0 | AG01<br>-4, A<br>G02 | 0 | 0 | 1 | 0 | 0 | 0 | 0 | 2 |
| MIMAT<br>00189<br>43 | hsa-mi<br>R-4428      | ENSG00<br>000146<br>648 | EGF<br>R | prote<br>in_co<br>ding | chr7 | 5527<br>4469 | 552<br>744<br>74 | 5527<br>4469 | 552<br>744<br>74 | + | 2 | 0 | AG02                 | 0 | 0 | 1 | 0 | 0 | 0 | 0 | 2 |
| MIMAT<br>00189<br>44 | hsa-mi<br>R-4429      | ENSG00<br>000146<br>648 | EGF<br>R | prote<br>in_co<br>ding | chr7 | 5522<br>1790 | 552<br>218<br>18 | 5522<br>1790 | 552<br>218<br>18 | + | 2 | 0 | AG01<br>-4, A<br>G02 | 0 | 0 | 0 | 1 | 0 | 0 | 0 | 0 |
| MIMAT<br>00189<br>44 | hsa-mi<br>R-4429      | ENSG00<br>000146<br>648 | EGF<br>R | prote<br>in_co<br>ding | chr7 | 5527<br>4393 | 552<br>744<br>21 | 5527<br>4393 | 552<br>744<br>21 | + | 6 | 0 | AG01<br>-4, A<br>G02 | 0 | 0 | 0 | 1 | 0 | 0 | 0 | 0 |
| MIMAT<br>00189<br>44 | hsa-mi<br>R-4429      | ENSG00<br>000146<br>648 | EGF<br>R | prote<br>in_co<br>ding | chr7 | 5527<br>7366 | 552<br>773<br>94 | 5527<br>7366 | 552<br>773<br>94 | + | 1 | 0 | AG01<br>-4           | 0 | 0 | 0 | 1 | 0 | 0 | 0 | 0 |
| MIMAT<br>00189<br>44 | hsa-mi<br>R-4429      | ENSG00<br>000146<br>648 | EGF<br>R | prote<br>in_co<br>ding | chr7 | 5527<br>9078 | 552<br>791<br>06 | 5527<br>9078 | 552<br>791<br>06 | + | 1 | 0 | AG01<br>-4           | 0 | 0 | 0 | 1 | 0 | 0 | 0 | 0 |
| MIMAT<br>00189<br>52 | hsa-mi<br>R-4436<br>a | ENSG00<br>000146<br>648 | EGF<br>R | prote<br>in_co<br>ding | chr7 | 5523<br>6308 | 552<br>363<br>13 | 5523<br>6308 | 552<br>363<br>13 | + | 1 | 0 | AG02                 | 0 | 0 | 1 | 0 | 0 | 0 | 0 | 1 |
| MIMAT<br>00190<br>59 | hsa-mi<br>R-1269<br>b | ENSG00<br>000146<br>648 | EGF<br>R | prote<br>in_co<br>ding | chr7 | 5523<br>8501 | 552<br>385<br>07 | 5523<br>8501 | 552<br>385<br>07 | + | 1 | 0 | AG02                 | 0 | 0 | 1 | 0 | 0 | 0 | 0 | 2 |

|              |                 |                 |      |                |      |          |          |          |          |   |   |   |              |   |   |   |   |   |   |   |   |
|--------------|-----------------|-----------------|------|----------------|------|----------|----------|----------|----------|---|---|---|--------------|---|---|---|---|---|---|---|---|
| MIMAT0019218 | hsa-miR-3194-3p | ENSG00000146648 | EGFR | protein_coding | chr7 | 55274954 | 55274959 | 55274954 | 55274959 | + | 1 | 0 | AG01-4       | 0 | 0 | 1 | 0 | 0 | 0 | 0 | 5 |
| MIMAT0019759 | hsa-miR-4676-3p | ENSG00000146648 | EGFR | protein_coding | chr7 | 55274795 | 55274801 | 55274795 | 55274801 | + | 3 | 0 | AG01-4, AG02 | 0 | 0 | 1 | 0 | 0 | 0 | 0 | 3 |
| MIMAT0019776 | hsa-miR-1343-3p | ENSG00000146648 | EGFR | protein_coding | chr7 | 55238389 | 55238395 | 55238389 | 55238395 | + | 2 | 0 | AG02         | 0 | 0 | 1 | 0 | 0 | 0 | 0 | 4 |
| MIMAT0019776 | hsa-miR-1343-3p | ENSG00000146648 | EGFR | protein_coding | chr7 | 55273356 | 55273362 | 55273356 | 55273362 | + | 5 | 0 | AG01-4, AG02 | 0 | 0 | 1 | 0 | 0 | 0 | 0 | 4 |
| MIMAT0019776 | hsa-miR-1343-3p | ENSG00000146648 | EGFR | protein_coding | chr7 | 55273453 | 55273458 | 55273453 | 55273458 | + | 5 | 0 | AG01-4, AG02 | 0 | 0 | 1 | 0 | 0 | 0 | 0 | 4 |
| MIMAT0019853 | hsa-miR-4731-5p | ENSG00000146648 | EGFR | protein_coding | chr7 | 55273010 | 55273038 | 55273010 | 55273038 | + | 3 | 0 | AG01-4, AG02 | 0 | 0 | 0 | 1 | 0 | 0 | 0 | 1 |
| MIMAT0019853 | hsa-miR-4731-5p | ENSG00000146648 | EGFR | protein_coding | chr7 | 55273851 | 55273857 | 55273830 | 55273858 | + | 2 | 0 | AG02         | 0 | 0 | 1 | 1 | 0 | 0 | 0 | 1 |
| MIMAT0019909 | hsa-miR-4761-3p | ENSG00000146648 | EGFR | protein_coding | chr7 | 55274758 | 55274763 | 55274758 | 55274763 | + | 1 | 0 | AG02         | 0 | 0 | 1 | 0 | 0 | 0 | 0 | 1 |
| MIMAT00199   | hsa-miR-4761    | ENSG00000146    | EGFR | protein_coding | chr7 | 55277229 | 552772   | 55277229 | 552772   | + | 2 | 0 | AG01-4, A    | 0 | 0 | 1 | 0 | 0 | 0 | 0 | 1 |

|                      |                         |                         |          |                        |      |              |                  |              |                  |   |   |   |                      |   |   |   |   |   |   |   |   |    |
|----------------------|-------------------------|-------------------------|----------|------------------------|------|--------------|------------------|--------------|------------------|---|---|---|----------------------|---|---|---|---|---|---|---|---|----|
| 09                   | -3p                     | 648                     |          | ding                   |      |              | 34               |              | 34               |   |   |   | G02                  |   |   |   |   |   |   |   |   |    |
| MIMAT<br>00199<br>53 | hsa-mi<br>R-2467<br>-3p | ENSG00<br>000146<br>648 | EGF<br>R | prote<br>in_co<br>ding | chr7 | 5527<br>4498 | 552<br>745<br>03 | 5527<br>4498 | 552<br>745<br>03 | + | 1 | 0 | AG02                 | 0 | 0 | 1 | 0 | 0 | 0 | 0 | 0 | 0  |
| MIMAT<br>00199<br>53 | hsa-mi<br>R-2467<br>-3p | ENSG00<br>000146<br>648 | EGF<br>R | prote<br>in_co<br>ding | chr7 | 5527<br>5499 | 552<br>755<br>04 | 5527<br>5499 | 552<br>755<br>04 | + | 1 | 0 | AG01<br>-4           | 0 | 0 | 1 | 0 | 0 | 0 | 0 | 0 | 0  |
| MIMAT<br>00199<br>53 | hsa-mi<br>R-2467<br>-3p | ENSG00<br>000146<br>648 | EGF<br>R | prote<br>in_co<br>ding | chr7 | 5527<br>7244 | 552<br>772<br>49 | 5527<br>7244 | 552<br>772<br>49 | + | 2 | 0 | AG01<br>-4, A<br>G02 | 0 | 0 | 1 | 0 | 0 | 0 | 0 | 0 | 0  |
| MIMAT<br>00222<br>72 | hsa-mi<br>R-664b<br>-3p | ENSG00<br>000146<br>648 | EGF<br>R | prote<br>in_co<br>ding | chr7 | 5527<br>4290 | 552<br>743<br>18 | 5527<br>4290 | 552<br>743<br>18 | + | 4 | 2 | AG01<br>-4, A<br>G02 | 0 | 0 | 0 | 1 | 0 | 0 | 0 | 0 | 11 |
| MIMAT<br>00222<br>72 | hsa-mi<br>R-664b<br>-3p | ENSG00<br>000146<br>648 | EGF<br>R | prote<br>in_co<br>ding | chr7 | 5527<br>9149 | 552<br>791<br>77 | 5527<br>9149 | 552<br>791<br>77 | + | 1 | 0 | AG01<br>-4           | 0 | 0 | 0 | 1 | 0 | 0 | 0 | 0 | 11 |
| MIMAT<br>00223<br>00 | hsa-mi<br>R-5590<br>-3p | ENSG00<br>000146<br>648 | EGF<br>R | prote<br>in_co<br>ding | chr7 | 5527<br>9102 | 552<br>791<br>07 | 5527<br>9102 | 552<br>791<br>07 | + | 1 | 0 | AG01<br>-4           | 0 | 0 | 1 | 0 | 0 | 0 | 0 | 0 | 3  |
| MIMAT<br>00224<br>79 | hsa-mi<br>R-5688        | ENSG00<br>000146<br>648 | EGF<br>R | prote<br>in_co<br>ding | chr7 | 5527<br>4227 | 552<br>742<br>32 | 5527<br>4205 | 552<br>742<br>33 | + | 4 | 0 | AG01<br>-4, A<br>G02 | 0 | 0 | 1 | 1 | 0 | 0 | 0 | 0 | 0  |
| MIMAT<br>00224<br>79 | hsa-mi<br>R-5688        | ENSG00<br>000146<br>648 | EGF<br>R | prote<br>in_co<br>ding | chr7 | 5527<br>7889 | 552<br>778<br>94 | 5527<br>7867 | 552<br>778<br>95 | + | 2 | 0 | AG01<br>-4, A<br>G02 | 0 | 0 | 1 | 1 | 0 | 0 | 0 | 0 | 0  |
| MIMAT                | hsa-mi                  | ENSG00                  | EGF      | prote                  | chr7 | 5526         | 552              | 5526         | 552              | + | 1 | 0 | AG01                 | 0 | 1 | 0 | 0 | 0 | 0 | 0 | 0 | 4  |

|                      |                         |                         |          |                        |      |              |                  |              |                  |   |   |   |                      |   |   |   |   |   |   |   |   |
|----------------------|-------------------------|-------------------------|----------|------------------------|------|--------------|------------------|--------------|------------------|---|---|---|----------------------|---|---|---|---|---|---|---|---|
| 00227<br>14          | R-766-<br>5p            | 000146<br>648           | R        | in_co<br>ding          |      | 6463         | 664<br>84        | 6463         | 664<br>84        |   |   |   | -4                   |   |   |   |   |   |   |   |   |
| MIMAT<br>00227<br>24 | hsa-mi<br>R-1277<br>-5p | ENSG00<br>000146<br>648 | EGF<br>R | prote<br>in_co<br>ding | chr7 | 5527<br>3562 | 552<br>735<br>90 | 5527<br>3562 | 552<br>735<br>90 | + | 2 | 0 | AG01<br>-4, A<br>G02 | 0 | 0 | 0 | 1 | 0 | 0 | 0 | 1 |
| MIMAT<br>00227<br>24 | hsa-mi<br>R-1277<br>-5p | ENSG00<br>000146<br>648 | EGF<br>R | prote<br>in_co<br>ding | chr7 | 5527<br>4991 | 552<br>750<br>19 | 5527<br>4991 | 552<br>750<br>19 | + | 1 | 0 | AG01<br>-4           | 0 | 0 | 0 | 1 | 0 | 0 | 0 | 1 |
| MIMAT<br>00227<br>24 | hsa-mi<br>R-1277<br>-5p | ENSG00<br>000146<br>648 | EGF<br>R | prote<br>in_co<br>ding | chr7 | 5527<br>5531 | 552<br>755<br>59 | 5527<br>5531 | 552<br>755<br>59 | + | 1 | 0 | AG01<br>-4           | 0 | 0 | 0 | 1 | 0 | 0 | 0 | 1 |
| MIMAT<br>00227<br>24 | hsa-mi<br>R-1277<br>-5p | ENSG00<br>000146<br>648 | EGF<br>R | prote<br>in_co<br>ding | chr7 | 5527<br>6302 | 552<br>763<br>30 | 5527<br>6302 | 552<br>763<br>30 | + | 1 | 0 | AG02                 | 0 | 0 | 0 | 1 | 0 | 0 | 0 | 1 |
| MIMAT<br>00227<br>24 | hsa-mi<br>R-1277<br>-5p | ENSG00<br>000146<br>648 | EGF<br>R | prote<br>in_co<br>ding | chr7 | 5527<br>7914 | 552<br>779<br>42 | 5527<br>7914 | 552<br>779<br>42 | + | 3 | 0 | AG01<br>-4, A<br>G02 | 0 | 0 | 0 | 1 | 0 | 0 | 0 | 1 |
| MIMAT<br>00228<br>44 | hsa-mi<br>R-216a<br>-3p | ENSG00<br>000146<br>648 | EGF<br>R | prote<br>in_co<br>ding | chr7 | 5527<br>3510 | 552<br>735<br>15 | 5527<br>3510 | 552<br>735<br>16 | + | 4 | 0 | AG01<br>-4, A<br>G02 | 0 | 0 | 1 | 0 | 0 | 1 | 0 | 3 |
| MIMAT<br>00228<br>44 | hsa-mi<br>R-216a<br>-3p | ENSG00<br>000146<br>648 | EGF<br>R | prote<br>in_co<br>ding | chr7 | 5527<br>5943 | 552<br>759<br>48 | 5527<br>5943 | 552<br>759<br>48 | + | 2 | 0 | AG01<br>-4           | 0 | 0 | 1 | 0 | 0 | 0 | 0 | 3 |
| MIMAT<br>00228<br>44 | hsa-mi<br>R-216a<br>-3p | ENSG00<br>000146<br>648 | EGF<br>R | prote<br>in_co<br>ding | chr7 | 5527<br>6358 | 552<br>763<br>64 | 5527<br>6358 | 552<br>763<br>64 | + | 1 | 0 | AG01<br>-4           | 0 | 0 | 1 | 0 | 0 | 0 | 0 | 3 |



c. RNA22

|                  |                  |                 |                 |
|------------------|------------------|-----------------|-----------------|
| hsa-let-7a-2-3p  | hsa-miR-3620-3p  | hsa-miR-4768-5p | hsa-miR-6772-5p |
| hsa-let-7a-5p    | hsa-miR-3620-5p  | hsa-miR-4768-5p | hsa-miR-6772-5p |
| hsa-let-7a-5p    | hsa-miR-3620-5p  | hsa-miR-4769-3p | hsa-miR-6772-5p |
| hsa-let-7a-5p    | hsa-miR-3620-5p  | hsa-miR-4769-3p | hsa-miR-6772-5p |
| hsa-let-7a-5p    | hsa-miR-3620-5p  | hsa-miR-4769-5p | hsa-miR-6772-5p |
| hsa-let-7b-5p    | hsa-miR-3620-5p  | hsa-miR-4769-5p | hsa-miR-6772-5p |
| hsa-let-7b-5p    | hsa-miR-3621     | hsa-miR-4769-5p | hsa-miR-6772-5p |
| hsa-let-7b-5p    | hsa-miR-3621     | hsa-miR-4769-5p | hsa-miR-6772-5p |
| hsa-let-7b-5p    | hsa-miR-3621     | hsa-miR-4772-5p | hsa-miR-6772-5p |
| hsa-let-7b-5p    | hsa-miR-3621     | hsa-miR-4774-3p | hsa-miR-6772-5p |
| hsa-let-7b-5p    | hsa-miR-3622a-3p | hsa-miR-4774-5p | hsa-miR-6772-5p |
| hsa-let-7b-5p    | hsa-miR-3622a-3p | hsa-miR-4774-5p | hsa-miR-6773-3p |
| hsa-let-7c-5p    | hsa-miR-3622a-5p | hsa-miR-4776-3p | hsa-miR-6773-3p |
| hsa-let-7c-5p    | hsa-miR-3622b-3p | hsa-miR-4776-3p | hsa-miR-6773-5p |
| hsa-let-7c-5p    | hsa-miR-3622b-3p | hsa-miR-4776-5p | hsa-miR-6773-5p |
| hsa-let-7c-5p    | hsa-miR-3622b-5p | hsa-miR-4776-5p | hsa-miR-6774-3p |
| hsa-let-7d-5p    | hsa-miR-3622b-5p | hsa-miR-4776-5p | hsa-miR-6774-5p |
| hsa-let-7d-5p    | hsa-miR-363-5p   | hsa-miR-4778-3p | hsa-miR-6774-5p |
| hsa-let-7d-5p    | hsa-miR-363-5p   | hsa-miR-4778-3p | hsa-miR-6774-5p |
| hsa-let-7d-5p    | hsa-miR-363-5p   | hsa-miR-4778-3p | hsa-miR-6774-5p |
| hsa-let-7e-5p    | hsa-miR-3648     | hsa-miR-4778-3p | hsa-miR-6775-3p |
| hsa-let-7e-5p    | hsa-miR-3648     | hsa-miR-4778-3p | hsa-miR-6775-3p |
| hsa-let-7e-5p    | hsa-miR-3648     | hsa-miR-4783-3p | hsa-miR-6775-3p |
| hsa-let-7e-5p    | hsa-miR-3649     | hsa-miR-4783-3p | hsa-miR-6775-3p |
| hsa-let-7f-5p    | hsa-miR-3650     | hsa-miR-4783-5p | hsa-miR-6775-5p |
| hsa-let-7g-3p    | hsa-miR-3650     | hsa-miR-4783-5p | hsa-miR-6775-5p |
| hsa-let-7g-5p    | hsa-miR-3650     | hsa-miR-4783-5p | hsa-miR-6775-5p |
| hsa-let-7g-5p    | hsa-miR-3650     | hsa-miR-4783-5p | hsa-miR-6776-5p |
| hsa-let-7g-5p    | hsa-miR-3651     | hsa-miR-4784    | hsa-miR-6776-5p |
| hsa-let-7i-3p    | hsa-miR-3651     | hsa-miR-4784    | hsa-miR-6776-5p |
| hsa-let-7i-3p    | hsa-miR-3652     | hsa-miR-4784    | hsa-miR-6776-5p |
| hsa-let-7i-3p    | hsa-miR-3652     | hsa-miR-4784    | hsa-miR-6776-5p |
| hsa-let-7i-5p    | hsa-miR-3652     | hsa-miR-4785    | hsa-miR-6776-5p |
| hsa-let-7i-5p    | hsa-miR-3652     | hsa-miR-4785    | hsa-miR-6776-5p |
| hsa-let-7i-5p    | hsa-miR-3652     | hsa-miR-4787-3p | hsa-miR-6776-5p |
| hsa-let-7i-5p    | hsa-miR-3653-5p  | hsa-miR-4787-3p | hsa-miR-6777-3p |
| hsa-let-7i-5p    | hsa-miR-3653-5p  | hsa-miR-4787-5p | hsa-miR-6777-5p |
| hsa-let-7i-5p    | hsa-miR-3655     | hsa-miR-4787-5p | hsa-miR-6777-5p |
| hsa-let-7i-5p    | hsa-miR-3655     | hsa-miR-4787-5p | hsa-miR-6777-5p |
| hsa-let-7i-5p    | hsa-miR-3655     | hsa-miR-4787-5p | hsa-miR-6777-5p |
| hsa-miR-103a-2-5 | hsa-miR-3655     | hsa-miR-4787-5p | hsa-miR-6777-5p |

|                 |                 |                 |                  |
|-----------------|-----------------|-----------------|------------------|
| hsa-miR-103a-3p | hsa-miR-3655    | hsa-miR-4787-5p | hsa-miR-6778-3p  |
| hsa-miR-103a-3p | hsa-miR-3655    | hsa-miR-4792    | hsa-miR-6778-3p  |
| hsa-miR-105-3p  | hsa-miR-3656    | hsa-miR-4792    | hsa-miR-6778-5p  |
| hsa-miR-106a-5p | hsa-miR-3656    | hsa-miR-4792    | hsa-miR-6778-5p  |
| hsa-miR-106b-3p | hsa-miR-3656    | hsa-miR-4792    | hsa-miR-6779-5p  |
| hsa-miR-106b-3p | hsa-miR-3656    | hsa-miR-4792    | hsa-miR-6779-5p  |
| hsa-miR-106b-5p | hsa-miR-3656    | hsa-miR-4793-3p | hsa-miR-6779-5p  |
| hsa-miR-107 E   | hsa-miR-3656    | hsa-miR-4793-5p | hsa-miR-6779-5p  |
| hsa-miR-107 E   | hsa-miR-3657    | hsa-miR-4794    | hsa-miR-6779-5p  |
| hsa-miR-10a-5p  | hsa-miR-365a-5p | hsa-miR-4794    | hsa-miR-6779-5p  |
| hsa-miR-1178-3p | hsa-miR-365a-5p | hsa-miR-4798-5p | hsa-miR-6780a-3p |
| hsa-miR-1178-5p | hsa-miR-365b-5p | hsa-miR-4798-5p | hsa-miR-6780a-5p |
| hsa-miR-1178-5p | hsa-miR-365b-5p | hsa-miR-4800-5p | hsa-miR-6780a-5p |
| hsa-miR-1178-5p | hsa-miR-365b-5p | hsa-miR-4800-5p | hsa-miR-6780a-5p |
| hsa-miR-1180-3p | hsa-miR-3661    | hsa-miR-4804-5p | hsa-miR-6780a-5p |
| hsa-miR-1180-5p | hsa-miR-3661    | hsa-miR-483-5p  | hsa-miR-6780a-5p |
| hsa-miR-1182    | hsa-miR-3663-5p | hsa-miR-484 E   | hsa-miR-6780a-5p |
| hsa-miR-1182    | hsa-miR-3663-5p | hsa-miR-485-3p  | hsa-miR-6780a-5p |
| hsa-miR-1183    | hsa-miR-3663-5p | hsa-miR-485-3p  | hsa-miR-6780b-3p |
| hsa-miR-1183    | hsa-miR-3663-5p | hsa-miR-485-5p  | hsa-miR-6781-5p  |
| hsa-miR-1183    | hsa-miR-3663-5p | hsa-miR-485-5p  | hsa-miR-6781-5p  |
| hsa-miR-1184    | hsa-miR-3663-5p | hsa-miR-485-5p  | hsa-miR-6782-5p  |
| hsa-miR-1184    | hsa-miR-3663-5p | hsa-miR-486-3p  | hsa-miR-6782-5p  |
| hsa-miR-1184    | hsa-miR-3663-5p | hsa-miR-486-3p  | hsa-miR-6783-3p  |
| hsa-miR-1193    | hsa-miR-3665    | hsa-miR-486-3p  | hsa-miR-6783-3p  |
| hsa-miR-1193    | hsa-miR-3665    | hsa-miR-486-3p  | hsa-miR-6783-5p  |
| hsa-miR-1193    | hsa-miR-3675-3p | hsa-miR-486-3p  | hsa-miR-6784-5p  |
| hsa-miR-1193    | hsa-miR-3677-3p | hsa-miR-486-5p  | hsa-miR-6784-5p  |
| hsa-miR-1193    | hsa-miR-3677-3p | hsa-miR-486-5p  | hsa-miR-6784-5p  |
| hsa-miR-1193    | hsa-miR-3677-3p | hsa-miR-487a-5p | hsa-miR-6785-5p  |
| hsa-miR-1193    | hsa-miR-3677-3p | hsa-miR-489-5p  | hsa-miR-6785-5p  |
| hsa-miR-1199-3p | hsa-miR-3677-3p | hsa-miR-489-5p  | hsa-miR-6785-5p  |
| hsa-miR-1199-5p | hsa-miR-3677-5p | hsa-miR-489-5p  | hsa-miR-6785-5p  |
| hsa-miR-1199-5p | hsa-miR-3677-5p | hsa-miR-490-5p  | hsa-miR-6785-5p  |
| hsa-miR-1200    | hsa-miR-3677-5p | hsa-miR-490-5p  | hsa-miR-6785-5p  |
| hsa-miR-1200    | hsa-miR-3678-3p | hsa-miR-490-5p  | hsa-miR-6785-5p  |
| hsa-miR-1202    | hsa-miR-3679-5p | hsa-miR-491-5p  | hsa-miR-6785-5p  |
| hsa-miR-1202    | hsa-miR-3679-5p | hsa-miR-492 E   | hsa-miR-6785-5p  |
| hsa-miR-1202    | hsa-miR-3679-5p | hsa-miR-492 E   | hsa-miR-6786-3p  |
| hsa-miR-1203    | hsa-miR-3679-5p | hsa-miR-492 E   | hsa-miR-6786-5p  |
| hsa-miR-1204    | hsa-miR-3680-3p | hsa-miR-493-3p  | hsa-miR-6786-5p  |
| hsa-miR-1204    | hsa-miR-3680-3p | hsa-miR-493-3p  | hsa-miR-6786-5p  |
| hsa-miR-1204    | hsa-miR-3682-3p | hsa-miR-493-5p  | hsa-miR-6786-5p  |

|                 |                  |                 |                 |
|-----------------|------------------|-----------------|-----------------|
| hsa-miR-1205    | hsa-miR-3682-3p  | hsa-miR-493-5p  | hsa-miR-6787-5p |
| hsa-miR-1205    | hsa-miR-3682-5p  | hsa-miR-494-5p  | hsa-miR-6787-5p |
| hsa-miR-1205    | hsa-miR-3683     | hsa-miR-494-5p  | hsa-miR-6787-5p |
| hsa-miR-1207-3p | hsa-miR-3685     | hsa-miR-494-5p  | hsa-miR-6787-5p |
| hsa-miR-1207-5p | hsa-miR-3687     | hsa-miR-494-5p  | hsa-miR-6787-5p |
| hsa-miR-1207-5p | hsa-miR-3687     | hsa-miR-494-5p  | hsa-miR-6787-5p |
| hsa-miR-1207-5p | hsa-miR-3687     | hsa-miR-494-5p  | hsa-miR-6787-5p |
| hsa-miR-1207-5p | hsa-miR-3689a-3p | hsa-miR-494-5p  | hsa-miR-6787-5p |
| hsa-miR-1207-5p | hsa-miR-3689a-3p | hsa-miR-494-5p  | hsa-miR-6787-5p |
| hsa-miR-1207-5p | hsa-miR-3689a-3p | hsa-miR-494-5p  | hsa-miR-6787-5p |
| hsa-miR-1208    | hsa-miR-3689a-3p | hsa-miR-496 E   | hsa-miR-6787-5p |
| hsa-miR-1208    | hsa-miR-3689a-3p | hsa-miR-497-5p  | hsa-miR-6788-3p |
| hsa-miR-1208    | hsa-miR-3689a-3p | hsa-miR-4999-5p | hsa-miR-6788-3p |
| hsa-miR-1224-5p | hsa-miR-3689b-3p | hsa-miR-4999-5p | hsa-miR-6788-3p |
| hsa-miR-1224-5p | hsa-miR-3689b-3p | hsa-miR-5000-3p | hsa-miR-6788-5p |
| hsa-miR-1225-3p | hsa-miR-3689b-3p | hsa-miR-5000-3p | hsa-miR-6788-5p |
| hsa-miR-1225-5p | hsa-miR-3689b-3p | hsa-miR-5000-5p | hsa-miR-6789-3p |
| hsa-miR-1225-5p | hsa-miR-3689b-3p | hsa-miR-5001-3p | hsa-miR-6789-3p |
| hsa-miR-1226-3p | hsa-miR-3689c    | hsa-miR-5001-3p | hsa-miR-6789-5p |
| hsa-miR-1226-5p | hsa-miR-3689c    | hsa-miR-5001-5p | hsa-miR-6789-5p |
| hsa-miR-1226-5p | hsa-miR-3689c    | hsa-miR-5001-5p | hsa-miR-6789-5p |
| hsa-miR-1226-5p | hsa-miR-3689c    | hsa-miR-5001-5p | hsa-miR-6789-5p |
| hsa-miR-1226-5p | hsa-miR-3689c    | hsa-miR-5001-5p | hsa-miR-6789-5p |
| hsa-miR-1226-5p | hsa-miR-3689d    | hsa-miR-5001-5p | hsa-miR-6790-5p |
| hsa-miR-1226-5p | hsa-miR-3689d    | hsa-miR-5001-5p | hsa-miR-6790-5p |
| hsa-miR-1227-5p | hsa-miR-3689d    | hsa-miR-5001-5p | hsa-miR-6790-5p |
| hsa-miR-1227-5p | hsa-miR-3689f    | hsa-miR-5001-5p | hsa-miR-6791-3p |
| hsa-miR-1227-5p | hsa-miR-3691-3p  | hsa-miR-5001-5p | hsa-miR-6791-3p |
| hsa-miR-1227-5p | hsa-miR-3691-5p  | hsa-miR-5001-5p | hsa-miR-6791-5p |
| hsa-miR-1227-5p | hsa-miR-3691-5p  | hsa-miR-5002-3p | hsa-miR-6791-5p |
| hsa-miR-1227-5p | hsa-miR-3692-5p  | hsa-miR-5003-3p | hsa-miR-6791-5p |
| hsa-miR-1227-5p | hsa-miR-3692-5p  | hsa-miR-5004-3p | hsa-miR-6792-3p |
| hsa-miR-1227-5p | hsa-miR-3692-5p  | hsa-miR-5004-3p | hsa-miR-6792-3p |
| hsa-miR-1227-5p | hsa-miR-3692-5p  | hsa-miR-5004-3p | hsa-miR-6793-5p |
| hsa-miR-1228-5p | hsa-miR-370-3p   | hsa-miR-5004-5p | hsa-miR-6793-5p |
| hsa-miR-1228-5p | hsa-miR-370-3p   | hsa-miR-5004-5p | hsa-miR-6793-5p |
| hsa-miR-1228-5p | hsa-miR-370-3p   | hsa-miR-5006-3p | hsa-miR-6793-5p |
| hsa-miR-1228-5p | hsa-miR-370-3p   | hsa-miR-5006-5p | hsa-miR-6793-5p |
| hsa-miR-1229-3p | hsa-miR-370-3p   | hsa-miR-5007-5p | hsa-miR-6794-3p |
| hsa-miR-1229-5p | hsa-miR-3713     | hsa-miR-5007-5p | hsa-miR-6794-5p |
| hsa-miR-1229-5p | hsa-miR-372-3p   | hsa-miR-5008-3p | hsa-miR-6794-5p |
| hsa-miR-1229-5p | hsa-miR-373-3p   | hsa-miR-5008-3p | hsa-miR-6795-5p |
| hsa-miR-1229-5p | hsa-miR-374b-3p  | hsa-miR-5008-3p | hsa-miR-6795-5p |

|                  |                  |                 |                 |
|------------------|------------------|-----------------|-----------------|
| hsa-miR-1229-5p  | hsa-miR-375 E    | hsa-miR-5008-3p | hsa-miR-6795-5p |
| hsa-miR-122-5p   | hsa-miR-375 E    | hsa-miR-5008-5p | hsa-miR-6795-5p |
| hsa-miR-122-5p   | hsa-miR-376a-2-5 | hsa-miR-5008-5p | hsa-miR-6795-5p |
| hsa-miR-122-5p   | hsa-miR-376a-5p  | hsa-miR-5009-5p | hsa-miR-6795-5p |
| hsa-miR-122-5p   | hsa-miR-376c-3p  | hsa-miR-5009-5p | hsa-miR-6795-5p |
| hsa-miR-122-5p   | hsa-miR-377-3p   | hsa-miR-500a-3p | hsa-miR-6795-5p |
| hsa-miR-1231     | hsa-miR-377-5p   | hsa-miR-500a-3p | hsa-miR-6796-5p |
| hsa-miR-1231     | hsa-miR-377-5p   | hsa-miR-5010-3p | hsa-miR-6796-5p |
| hsa-miR-1231     | hsa-miR-377-5p   | hsa-miR-5010-3p | hsa-miR-6796-5p |
| hsa-miR-1231     | hsa-miR-378a-5p  | hsa-miR-5010-5p | hsa-miR-6796-5p |
| hsa-miR-1231     | hsa-miR-378b     | hsa-miR-5010-5p | hsa-miR-6796-5p |
| hsa-miR-1231     | hsa-miR-378e     | hsa-miR-5011-3p | hsa-miR-6796-5p |
| hsa-miR-1231     | hsa-miR-378g     | hsa-miR-501-5p  | hsa-miR-6796-5p |
| hsa-miR-1231     | hsa-miR-378g     | hsa-miR-502-5p  | hsa-miR-6796-5p |
| hsa-miR-1233-3p  | hsa-miR-381-5p   | hsa-miR-502-5p  | hsa-miR-6796-5p |
| hsa-miR-1233-3p  | hsa-miR-381-5p   | hsa-miR-502-5p  | hsa-miR-6796-5p |
| hsa-miR-1233-5p  | hsa-miR-382-5p   | hsa-miR-502-5p  | hsa-miR-6796-5p |
| hsa-miR-1233-5p  | hsa-miR-384 E    | hsa-miR-503-3p  | hsa-miR-6797-5p |
| hsa-miR-1233-5p  | hsa-miR-3907     | hsa-miR-503-3p  | hsa-miR-6797-5p |
| hsa-miR-1233-5p  | hsa-miR-3907     | hsa-miR-503-3p  | hsa-miR-6797-5p |
| hsa-miR-1236-3p  | hsa-miR-3907     | hsa-miR-503-3p  | hsa-miR-6797-5p |
| hsa-miR-1236-3p  | hsa-miR-3907     | hsa-miR-503-3p  | hsa-miR-6797-5p |
| hsa-miR-1236-5p  | hsa-miR-3907     | hsa-miR-503-3p  | hsa-miR-6797-5p |
| hsa-miR-1237-5p  | hsa-miR-3909     | hsa-miR-503-3p  | hsa-miR-6798-3p |
| hsa-miR-1237-5p  | hsa-miR-3909     | hsa-miR-5047    | hsa-miR-6798-5p |
| hsa-miR-1237-5p  | hsa-miR-3909     | hsa-miR-5047    | hsa-miR-6798-5p |
| hsa-miR-1237-5p  | hsa-miR-3909     | hsa-miR-504-3p  | hsa-miR-6798-5p |
| hsa-miR-1237-5p  | hsa-miR-3909     | hsa-miR-504-3p  | hsa-miR-6798-5p |
| hsa-miR-1237-5p  | hsa-miR-3911     | hsa-miR-504-3p  | hsa-miR-6798-5p |
| hsa-miR-1237-5p  | hsa-miR-3911     | hsa-miR-504-3p  | hsa-miR-6799-3p |
| hsa-miR-1238-3p  | hsa-miR-3911     | hsa-miR-504-3p  | hsa-miR-6799-3p |
| hsa-miR-1238-3p  | hsa-miR-3911     | hsa-miR-504-5p  | hsa-miR-6799-5p |
| hsa-miR-1238-3p  | hsa-miR-3911     | hsa-miR-504-5p  | hsa-miR-6799-5p |
| hsa-miR-1238-3p  | hsa-miR-3911     | hsa-miR-504-5p  | hsa-miR-6799-5p |
| hsa-miR-1238-5p  | hsa-miR-3912-5p  | hsa-miR-505-3p  | hsa-miR-6799-5p |
| hsa-miR-1238-5p  | hsa-miR-3913-5p  | hsa-miR-505-5p  | hsa-miR-6799-5p |
| hsa-miR-1245b-3p | hsa-miR-3917     | hsa-miR-507 E   | hsa-miR-6799-5p |
| hsa-miR-1245b-3p | hsa-miR-3917     | hsa-miR-5087    | hsa-miR-6799-5p |
| hsa-miR-1248     | hsa-miR-3921     | hsa-miR-5087    | hsa-miR-6800-5p |
| hsa-miR-1248     | hsa-miR-3921     | hsa-miR-5087    | hsa-miR-6800-5p |
| hsa-miR-1249-5p  | hsa-miR-3922-3p  | hsa-miR-5087    | hsa-miR-6800-5p |
| hsa-miR-1249-5p  | hsa-miR-3922-3p  | hsa-miR-5087    | hsa-miR-6801-3p |
| hsa-miR-1249-5p  | hsa-miR-3922-3p  | hsa-miR-5087    | hsa-miR-6801-5p |

|                  |                 |                 |                 |
|------------------|-----------------|-----------------|-----------------|
| hsa-miR-1249-5p  | hsa-miR-3922-5p | hsa-miR-5087    | hsa-miR-6801-5p |
| hsa-miR-1249-5p  | hsa-miR-3922-5p | hsa-miR-5087    | hsa-miR-6801-5p |
| hsa-miR-1249-5p  | hsa-miR-3927-3p | hsa-miR-5087    | hsa-miR-6802-5p |
| hsa-miR-1249-5p  | hsa-miR-3928-5p | hsa-miR-5088-3p | hsa-miR-6802-5p |
| hsa-miR-124-3p   | hsa-miR-3929    | hsa-miR-5088-5p | hsa-miR-6802-5p |
| hsa-miR-124-5p   | hsa-miR-3934-3p | hsa-miR-5088-5p | hsa-miR-6803-3p |
| hsa-miR-1250-5p  | hsa-miR-3934-3p | hsa-miR-5088-5p | hsa-miR-6803-3p |
| hsa-miR-1250-5p  | hsa-miR-3934-3p | hsa-miR-5088-5p | hsa-miR-6803-3p |
| hsa-miR-1250-5p  | hsa-miR-3934-3p | hsa-miR-5089-3p | hsa-miR-6803-5p |
| hsa-miR-1251-3p  | hsa-miR-3934-3p | hsa-miR-5089-5p | hsa-miR-6803-5p |
| hsa-miR-1251-3p  | hsa-miR-3937    | hsa-miR-508-5p  | hsa-miR-6803-5p |
| hsa-miR-1251-3p  | hsa-miR-3940-5p | hsa-miR-5090    | hsa-miR-6803-5p |
| hsa-miR-1254     | hsa-miR-3940-5p | hsa-miR-5090    | hsa-miR-6803-5p |
| hsa-miR-1255a    | hsa-miR-3940-5p | hsa-miR-5090    | hsa-miR-6803-5p |
| hsa-miR-1255b-5p | hsa-miR-3940-5p | hsa-miR-5090    | hsa-miR-6803-5p |
| hsa-miR-1257     | hsa-miR-3940-5p | hsa-miR-5095    | hsa-miR-6803-5p |
| hsa-miR-1258     | hsa-miR-3940-5p | hsa-miR-5096    | hsa-miR-6803-5p |
| hsa-miR-1258     | hsa-miR-3940-5p | hsa-miR-5096    | hsa-miR-6803-5p |
| hsa-miR-125a-3p  | hsa-miR-3940-5p | hsa-miR-5096    | hsa-miR-6804-3p |
| hsa-miR-125a-3p  | hsa-miR-3940-5p | hsa-miR-509-3p  | hsa-miR-6804-3p |
| hsa-miR-125a-5p  | hsa-miR-3944-3p | hsa-miR-509-5p  | hsa-miR-6804-5p |
| hsa-miR-125a-5p  | hsa-miR-3944-3p | hsa-miR-5100    | hsa-miR-6804-5p |
| hsa-miR-125b-1-3 | hsa-miR-3944-3p | hsa-miR-511-5p  | hsa-miR-6804-5p |
| hsa-miR-125b-1-3 | hsa-miR-3944-3p | hsa-miR-511-5p  | hsa-miR-6804-5p |
| hsa-miR-1261     | hsa-miR-3944-3p | hsa-miR-512-3p  | hsa-miR-6805-3p |
| hsa-miR-1262     | hsa-miR-3944-5p | hsa-miR-514b-5p | hsa-miR-6805-3p |
| hsa-miR-1262     | hsa-miR-3945    | hsa-miR-515-3p  | hsa-miR-6805-5p |
| hsa-miR-1262     | hsa-miR-3945    | hsa-miR-515-5p  | hsa-miR-6805-5p |
| hsa-miR-1263     | hsa-miR-3945    | hsa-miR-516a-3p | hsa-miR-6805-5p |
| hsa-miR-1263     | hsa-miR-3945    | hsa-miR-516a-5p | hsa-miR-6805-5p |
| hsa-miR-1263     | hsa-miR-3945    | hsa-miR-516b-3p | hsa-miR-6806-3p |
| hsa-miR-1265     | hsa-miR-3960    | hsa-miR-516b-5p | hsa-miR-6806-5p |
| hsa-miR-1265     | hsa-miR-3960    | hsa-miR-516b-5p | hsa-miR-6806-5p |
| hsa-miR-1266-3p  | hsa-miR-3960    | hsa-miR-517-5p  | hsa-miR-6806-5p |
| hsa-miR-1266-3p  | hsa-miR-3960    | hsa-miR-517-5p  | hsa-miR-6806-5p |
| hsa-miR-1266-3p  | hsa-miR-3960    | hsa-miR-517a-3p | hsa-miR-6806-5p |
| hsa-miR-1266-3p  | hsa-miR-3960    | hsa-miR-517a-3p | hsa-miR-6806-5p |
| hsa-miR-1266-5p  | hsa-miR-3972    | hsa-miR-517b-3p | hsa-miR-6807-3p |
| hsa-miR-1268a    | hsa-miR-3972    | hsa-miR-517b-3p | hsa-miR-6807-3p |
| hsa-miR-1268a    | hsa-miR-3974    | hsa-miR-517c-3p | hsa-miR-6807-5p |
| hsa-miR-1268a    | hsa-miR-3975    | hsa-miR-5187-5p | hsa-miR-6807-5p |
| hsa-miR-1268a    | hsa-miR-3975    | hsa-miR-5187-5p | hsa-miR-6808-3p |
| hsa-miR-1268a    | hsa-miR-3978    | hsa-miR-5189-5p | hsa-miR-6808-5p |

|                  |                |                 |                 |
|------------------|----------------|-----------------|-----------------|
| hsa-miR-1268a    | hsa-miR-409-3p | hsa-miR-5189-5p | hsa-miR-6809-3p |
| hsa-miR-1268a    | hsa-miR-409-5p | hsa-miR-5189-5p | hsa-miR-6809-5p |
| hsa-miR-1268a    | hsa-miR-410-5p | hsa-miR-5189-5p | hsa-miR-6810-3p |
| hsa-miR-1268b    | hsa-miR-410-5p | hsa-miR-5189-5p | hsa-miR-6810-5p |
| hsa-miR-1268b    | hsa-miR-410-5p | hsa-miR-518c-5p | hsa-miR-6810-5p |
| hsa-miR-1268b    | hsa-miR-410-5p | hsa-miR-518c-5p | hsa-miR-6810-5p |
| hsa-miR-1268b    | hsa-miR-410-5p | hsa-miR-518c-5p | hsa-miR-6810-5p |
| hsa-miR-1268b    | hsa-miR-410-5p | hsa-miR-518d-5p | hsa-miR-6810-5p |
| hsa-miR-1268b    | hsa-miR-410-5p | hsa-miR-518e-5p | hsa-miR-6811-3p |
| hsa-miR-1269a    | hsa-miR-412-3p | hsa-miR-518f-5p | hsa-miR-6811-5p |
| hsa-miR-1269a    | hsa-miR-422a   | hsa-miR-5190    | hsa-miR-6812-5p |
| hsa-miR-1269a    | hsa-miR-422a   | hsa-miR-5191    | hsa-miR-6812-5p |
| hsa-miR-1269a    | hsa-miR-422a   | hsa-miR-5192    | hsa-miR-6812-5p |
| hsa-miR-1269a    | hsa-miR-423-3p | hsa-miR-5192    | hsa-miR-6812-5p |
| hsa-miR-1269b    | hsa-miR-423-5p | hsa-miR-5192    | hsa-miR-6812-5p |
| hsa-miR-1269b    | hsa-miR-423-5p | hsa-miR-5192    | hsa-miR-6813-5p |
| hsa-miR-126-5p   | hsa-miR-423-5p | hsa-miR-5194    | hsa-miR-6813-5p |
| hsa-miR-126-5p   | hsa-miR-423-5p | hsa-miR-5194    | hsa-miR-6813-5p |
| hsa-miR-1270     | hsa-miR-423-5p | hsa-miR-5194    | hsa-miR-6813-5p |
| hsa-miR-1271-3p  | hsa-miR-4252   | hsa-miR-5194    | hsa-miR-6814-3p |
| hsa-miR-1271-3p  | hsa-miR-4252   | hsa-miR-5194    | hsa-miR-6814-5p |
| hsa-miR-1271-3p  | hsa-miR-4252   | hsa-miR-5195-5p | hsa-miR-6815-3p |
| hsa-miR-1271-5p  | hsa-miR-4253   | hsa-miR-5196-3p | hsa-miR-6815-5p |
| hsa-miR-1271-5p  | hsa-miR-4253   | hsa-miR-5196-5p | hsa-miR-6815-5p |
| hsa-miR-1271-5p  | hsa-miR-4253   | hsa-miR-5196-5p | hsa-miR-6816-5p |
| hsa-miR-1272     | hsa-miR-4253   | hsa-miR-5196-5p | hsa-miR-6816-5p |
| hsa-miR-1273a    | hsa-miR-4254   | hsa-miR-519a-5p | hsa-miR-6816-5p |
| hsa-miR-1273d    | hsa-miR-4254   | hsa-miR-519b-5p | hsa-miR-6816-5p |
| hsa-miR-1273f    | hsa-miR-4254   | hsa-miR-519c-5p | hsa-miR-6816-5p |
| hsa-miR-1273f    | hsa-miR-4255   | hsa-miR-519d-5p | hsa-miR-6817-3p |
| hsa-miR-1273g-3p | hsa-miR-4256   | hsa-miR-519e-5p | hsa-miR-6817-3p |
| hsa-miR-1273g-5p | hsa-miR-4257   | hsa-miR-520a-5p | hsa-miR-6817-5p |
| hsa-miR-1273g-5p | hsa-miR-4257   | hsa-miR-520c-5p | hsa-miR-6818-3p |
| hsa-miR-1273g-5p | hsa-miR-4258   | hsa-miR-520g-5p | hsa-miR-6818-3p |
| hsa-miR-1273g-5p | hsa-miR-4259   | hsa-miR-520g-5p | hsa-miR-6818-3p |
| hsa-miR-1273g-5p | hsa-miR-4259   | hsa-miR-520g-5p | hsa-miR-6818-3p |
| hsa-miR-1273g-5p | hsa-miR-425-3p | hsa-miR-522-5p  | hsa-miR-6818-3p |
| hsa-miR-1273g-5p | hsa-miR-4260   | hsa-miR-523-5p  | hsa-miR-6818-5p |
| hsa-miR-1273h-3p | hsa-miR-4260   | hsa-miR-525-5p  | hsa-miR-6818-5p |
| hsa-miR-1273h-5p | hsa-miR-4260   | hsa-miR-526a    | hsa-miR-6818-5p |
| hsa-miR-1273h-5p | hsa-miR-4260   | hsa-miR-526b-5p | hsa-miR-6818-5p |
| hsa-miR-1273h-5p | hsa-miR-4260   | hsa-miR-526b-5p | hsa-miR-6819-3p |
| hsa-miR-1273h-5p | hsa-miR-4260   | hsa-miR-526b-5p | hsa-miR-6819-5p |

|                  |              |                  |                 |
|------------------|--------------|------------------|-----------------|
| hsa-miR-1273h-5p | hsa-miR-4265 | hsa-miR-532-5p   | hsa-miR-6819-5p |
| hsa-miR-1273h-5p | hsa-miR-4265 | hsa-miR-541-3p   | hsa-miR-6819-5p |
| hsa-miR-1275     | hsa-miR-4265 | hsa-miR-541-3p   | hsa-miR-6819-5p |
| hsa-miR-1275     | hsa-miR-4265 | hsa-miR-541-3p   | hsa-miR-6819-5p |
| hsa-miR-1275     | hsa-miR-4265 | hsa-miR-541-3p   | hsa-miR-6819-5p |
| hsa-miR-127-3p   | hsa-miR-4265 | hsa-miR-541-3p   | hsa-miR-6819-5p |
| hsa-miR-127-3p   | hsa-miR-4265 | hsa-miR-542-5p   | hsa-miR-6820-5p |
| hsa-miR-127-5p   | hsa-miR-4265 | hsa-miR-544a     | hsa-miR-6820-5p |
| hsa-miR-127-5p   | hsa-miR-4267 | hsa-miR-544b     | hsa-miR-6820-5p |
| hsa-miR-127-5p   | hsa-miR-4268 | hsa-miR-544b     | hsa-miR-6820-5p |
| hsa-miR-1281     | hsa-miR-4271 | hsa-miR-544b     | hsa-miR-6820-5p |
| hsa-miR-1282     | hsa-miR-4271 | hsa-miR-544b     | hsa-miR-6820-5p |
| hsa-miR-1285-3p  | hsa-miR-4271 | hsa-miR-548ai    | hsa-miR-6820-5p |
| hsa-miR-1285-3p  | hsa-miR-4273 | hsa-miR-548an    | hsa-miR-6820-5p |
| hsa-miR-1285-5p  | hsa-miR-4277 | hsa-miR-548ao-3p | hsa-miR-6820-5p |
| hsa-miR-1286     | hsa-miR-4277 | hsa-miR-548ao-3p | hsa-miR-6821-3p |
| hsa-miR-1287-5p  | hsa-miR-4277 | hsa-miR-548aq-5p | hsa-miR-6821-5p |
| hsa-miR-1287-5p  | hsa-miR-4278 | hsa-miR-548ar-5p | hsa-miR-6822-3p |
| hsa-miR-1287-5p  | hsa-miR-4278 | hsa-miR-548au-3p | hsa-miR-6822-3p |
| hsa-miR-1288-3p  | hsa-miR-4279 | hsa-miR-548ax    | hsa-miR-6822-3p |
| hsa-miR-1289     | hsa-miR-4279 | hsa-miR-548bb-3p | hsa-miR-6822-3p |
| hsa-miR-128-1-5p | hsa-miR-4280 | hsa-miR-548d-3p  | hsa-miR-6822-5p |
| hsa-miR-128-1-5p | hsa-miR-4281 | hsa-miR-548h-3p  | hsa-miR-6823-5p |
| hsa-miR-128-1-5p | hsa-miR-4281 | hsa-miR-548q     | hsa-miR-6824-3p |
| hsa-miR-128-1-5p | hsa-miR-4281 | hsa-miR-548q     | hsa-miR-6824-3p |
| hsa-miR-128-2-5p | hsa-miR-4283 | hsa-miR-548q     | hsa-miR-6824-5p |
| hsa-miR-128-2-5p | hsa-miR-4283 | hsa-miR-548q     | hsa-miR-6824-5p |
| hsa-miR-128-2-5p | hsa-miR-4285 | hsa-miR-548s     | hsa-miR-6824-5p |
| hsa-miR-128-3p   | hsa-miR-4287 | hsa-miR-548u     | hsa-miR-6824-5p |
| hsa-miR-128-3p   | hsa-miR-4287 | hsa-miR-548z     | hsa-miR-6824-5p |
| hsa-miR-1290     | hsa-miR-4289 | hsa-miR-550a-3-5 | hsa-miR-6825-3p |
| hsa-miR-1291     | hsa-miR-4289 | hsa-miR-550a-3p  | hsa-miR-6825-5p |
| hsa-miR-1291     | hsa-miR-4289 | hsa-miR-550a-3p  | hsa-miR-6825-5p |
| hsa-miR-1292-3p  | hsa-miR-4289 | hsa-miR-550a-5p  | hsa-miR-6825-5p |
| hsa-miR-1292-3p  | hsa-miR-4289 | hsa-miR-550a-5p  | hsa-miR-6825-5p |
| hsa-miR-1292-5p  | hsa-miR-4290 | hsa-miR-550a-5p  | hsa-miR-6825-5p |
| hsa-miR-1292-5p  | hsa-miR-4290 | hsa-miR-550b-2-5 | hsa-miR-6827-3p |
| hsa-miR-1292-5p  | hsa-miR-4291 | hsa-miR-552-3p   | hsa-miR-6827-5p |
| hsa-miR-1293     | hsa-miR-4292 | hsa-miR-552-3p   | hsa-miR-6827-5p |
| hsa-miR-1293     | hsa-miR-4292 | hsa-miR-552-3p   | hsa-miR-6827-5p |
| hsa-miR-1293     | hsa-miR-4292 | hsa-miR-554 E    | hsa-miR-6827-5p |
| hsa-miR-1293     | hsa-miR-4293 | hsa-miR-554 E    | hsa-miR-6828-3p |
| hsa-miR-1293     | hsa-miR-4297 | hsa-miR-555 E    | hsa-miR-6829-3p |

|                 |                |                 |                 |
|-----------------|----------------|-----------------|-----------------|
| hsa-miR-1293    | hsa-miR-4298   | hsa-miR-5571-3p | hsa-miR-6829-5p |
| hsa-miR-1293    | hsa-miR-4298   | hsa-miR-5571-3p | hsa-miR-6830-3p |
| hsa-miR-1294    | hsa-miR-4298   | hsa-miR-5571-3p | hsa-miR-6830-3p |
| hsa-miR-1294    | hsa-miR-4298   | hsa-miR-5571-3p | hsa-miR-6831-5p |
| hsa-miR-1294    | hsa-miR-4298   | hsa-miR-5571-5p | hsa-miR-6831-5p |
| hsa-miR-1294    | hsa-miR-4299   | hsa-miR-5572    | hsa-miR-6831-5p |
| hsa-miR-1294    | hsa-miR-4301   | hsa-miR-5572    | hsa-miR-6832-5p |
| hsa-miR-1296-3p | hsa-miR-4302   | hsa-miR-5572    | hsa-miR-6832-5p |
| hsa-miR-1296-5p | hsa-miR-4304   | hsa-miR-5572    | hsa-miR-6832-5p |
| hsa-miR-1296-5p | hsa-miR-4304   | hsa-miR-5572    | hsa-miR-6832-5p |
| hsa-miR-1296-5p | hsa-miR-4306   | hsa-miR-5572    | hsa-miR-6833-3p |
| hsa-miR-1296-5p | hsa-miR-4308   | hsa-miR-5572    | hsa-miR-6833-3p |
| hsa-miR-1299    | hsa-miR-4312   | hsa-miR-5572    | hsa-miR-6833-5p |
| hsa-miR-1299    | hsa-miR-4312   | hsa-miR-5572    | hsa-miR-6833-5p |
| hsa-miR-1299    | hsa-miR-4312   | hsa-miR-5572    | hsa-miR-6833-5p |
| hsa-miR-129-5p  | hsa-miR-4312   | hsa-miR-557 E   | hsa-miR-6834-5p |
| hsa-miR-129-5p  | hsa-miR-4312   | hsa-miR-557 E   | hsa-miR-6834-5p |
| hsa-miR-129-5p  | hsa-miR-4314   | hsa-miR-557 E   | hsa-miR-6834-5p |
| hsa-miR-129-5p  | hsa-miR-4315   | hsa-miR-557 E   | hsa-miR-6834-5p |
| hsa-miR-1301-3p | hsa-miR-4316   | hsa-miR-557 E   | hsa-miR-6834-5p |
| hsa-miR-1302    | hsa-miR-4316   | hsa-miR-5580-5p | hsa-miR-6834-5p |
| hsa-miR-1302    | hsa-miR-4316   | hsa-miR-5581-3p | hsa-miR-6834-5p |
| hsa-miR-1303    | hsa-miR-4316   | hsa-miR-5584-3p | hsa-miR-6834-5p |
| hsa-miR-1304-3p | hsa-miR-4316   | hsa-miR-5584-3p | hsa-miR-6835-5p |
| hsa-miR-1304-5p | hsa-miR-4318   | hsa-miR-5584-5p | hsa-miR-6835-5p |
| hsa-miR-1304-5p | hsa-miR-4318   | hsa-miR-5585-3p | hsa-miR-6835-5p |
| hsa-miR-1304-5p | hsa-miR-4318   | hsa-miR-5586-3p | hsa-miR-6835-5p |
| hsa-miR-1304-5p | hsa-miR-431-3p | hsa-miR-5586-3p | hsa-miR-6835-5p |
| hsa-miR-1306-3p | hsa-miR-431-3p | hsa-miR-5587-3p | hsa-miR-6835-5p |
| hsa-miR-1306-3p | hsa-miR-431-3p | hsa-miR-5587-3p | hsa-miR-6835-5p |
| hsa-miR-1307-3p | hsa-miR-431-3p | hsa-miR-5587-5p | hsa-miR-6835-5p |
| hsa-miR-1307-3p | hsa-miR-431-5p | hsa-miR-5587-5p | hsa-miR-6835-5p |
| hsa-miR-1307-3p | hsa-miR-431-5p | hsa-miR-5589-3p | hsa-miR-6835-5p |
| hsa-miR-1307-3p | hsa-miR-431-5p | hsa-miR-5589-5p | hsa-miR-6836-3p |
| hsa-miR-1307-3p | hsa-miR-431-5p | hsa-miR-5589-5p | hsa-miR-6836-5p |
| hsa-miR-1307-3p | hsa-miR-431-5p | hsa-miR-5589-5p | hsa-miR-6836-5p |
| hsa-miR-1307-5p | hsa-miR-4320   | hsa-miR-5589-5p | hsa-miR-6836-5p |
| hsa-miR-130a-5p | hsa-miR-4322   | hsa-miR-5589-5p | hsa-miR-6837-3p |
| hsa-miR-130b-3p | hsa-miR-4322   | hsa-miR-5589-5p | hsa-miR-6837-3p |
| hsa-miR-1321    | hsa-miR-4322   | hsa-miR-5589-5p | hsa-miR-6837-3p |
| hsa-miR-1322    | hsa-miR-4322   | hsa-miR-5589-5p | hsa-miR-6837-5p |
| hsa-miR-133a-3p | hsa-miR-4322   | hsa-miR-558 E   | hsa-miR-6838-3p |
| hsa-miR-133a-3p | hsa-miR-4322   | hsa-miR-5591-5p | hsa-miR-6838-3p |

|                  |                 |                 |                 |
|------------------|-----------------|-----------------|-----------------|
| hsa-miR-133b     | hsa-miR-4322    | hsa-miR-5591-5p | hsa-miR-6840-3p |
| hsa-miR-1343-3p  | hsa-miR-4322    | hsa-miR-5591-5p | hsa-miR-6840-3p |
| hsa-miR-1343-3p  | hsa-miR-4322    | hsa-miR-5591-5p | hsa-miR-6840-3p |
| hsa-miR-1343-3p  | hsa-miR-4322    | hsa-miR-5591-5p | hsa-miR-6840-5p |
| hsa-miR-1343-5p  | hsa-miR-4324    | hsa-miR-563 E   | hsa-miR-6841-3p |
| hsa-miR-134-3p   | hsa-miR-4325    | hsa-miR-564 E   | hsa-miR-6841-3p |
| hsa-miR-134-3p   | hsa-miR-4326    | hsa-miR-564 E   | hsa-miR-6842-3p |
| hsa-miR-134-3p   | hsa-miR-4326    | hsa-miR-564 E   | hsa-miR-6842-3p |
| hsa-miR-134-5p   | hsa-miR-4326    | hsa-miR-566 E   | hsa-miR-6842-5p |
| hsa-miR-135a-3p  | hsa-miR-4327    | hsa-miR-566 E   | hsa-miR-6842-5p |
| hsa-miR-135b-3p  | hsa-miR-4327    | hsa-miR-567 E   | hsa-miR-6842-5p |
| hsa-miR-136-3p   | hsa-miR-4327    | hsa-miR-5691    | hsa-miR-6842-5p |
| hsa-miR-136-5p   | hsa-miR-432-3p  | hsa-miR-5691    | hsa-miR-6842-5p |
| hsa-miR-138-1-3p | hsa-miR-432-3p  | hsa-miR-5691    | hsa-miR-6843-3p |
| hsa-miR-138-1-3p | hsa-miR-432-5p  | hsa-miR-5698    | hsa-miR-6843-3p |
| hsa-miR-139-3p   | hsa-miR-432-5p  | hsa-miR-5698    | hsa-miR-6845-5p |
| hsa-miR-139-3p   | hsa-miR-432-5p  | hsa-miR-5698    | hsa-miR-6845-5p |
| hsa-miR-139-3p   | hsa-miR-432-5p  | hsa-miR-5698    | hsa-miR-6846-3p |
| hsa-miR-140-3p   | hsa-miR-432-5p  | hsa-miR-5698    | hsa-miR-6846-5p |
| hsa-miR-140-5p   | hsa-miR-433-3p  | hsa-miR-5698    | hsa-miR-6846-5p |
| hsa-miR-140-5p   | hsa-miR-4417    | hsa-miR-5698    | hsa-miR-6846-5p |
| hsa-miR-141-5p   | hsa-miR-4417    | hsa-miR-5698    | hsa-miR-6846-5p |
| hsa-miR-142-3p   | hsa-miR-4417    | hsa-miR-5698    | hsa-miR-6846-5p |
| hsa-miR-142-3p   | hsa-miR-4418    | hsa-miR-5698    | hsa-miR-6846-5p |
| hsa-miR-142-3p   | hsa-miR-4419a   | hsa-miR-5698    | hsa-miR-6846-5p |
| hsa-miR-142-3p   | hsa-miR-4419b   | hsa-miR-5699-3p | hsa-miR-6846-5p |
| hsa-miR-143-5p   | hsa-miR-4419b   | hsa-miR-5699-3p | hsa-miR-6846-5p |
| hsa-miR-143-5p   | hsa-miR-4419b   | hsa-miR-5699-3p | hsa-miR-6846-5p |
| hsa-miR-143-5p   | hsa-miR-4420    | hsa-miR-5699-3p | hsa-miR-6847-3p |
| hsa-miR-143-5p   | hsa-miR-4420    | hsa-miR-5699-3p | hsa-miR-6847-3p |
| hsa-miR-145-3p   | hsa-miR-4420    | hsa-miR-5699-5p | hsa-miR-6847-5p |
| hsa-miR-145-5p   | hsa-miR-4421    | hsa-miR-5702    | hsa-miR-6847-5p |
| hsa-miR-145-5p   | hsa-miR-4421    | hsa-miR-5703    | hsa-miR-6848-3p |
| hsa-miR-1468-5p  | hsa-miR-4421    | hsa-miR-5703    | hsa-miR-6848-3p |
| hsa-miR-1469     | hsa-miR-4421    | hsa-miR-5705    | hsa-miR-6848-3p |
| hsa-miR-1469     | hsa-miR-4421    | hsa-miR-5705    | hsa-miR-6848-3p |
| hsa-miR-146a-3p  | hsa-miR-4423-5p | hsa-miR-5705    | hsa-miR-6848-5p |
| hsa-miR-146b-3p  | hsa-miR-4423-5p | hsa-miR-5705    | hsa-miR-6848-5p |
| hsa-miR-146b-3p  | hsa-miR-4423-5p | hsa-miR-5705    | hsa-miR-6848-5p |
| hsa-miR-146b-3p  | hsa-miR-4424    | hsa-miR-5706    | hsa-miR-6848-5p |
| hsa-miR-146b-3p  | hsa-miR-4425    | hsa-miR-5707    | hsa-miR-6848-5p |
| hsa-miR-146b-3p  | hsa-miR-4425    | hsa-miR-570-3p  | hsa-miR-6848-5p |
| hsa-miR-146b-3p  | hsa-miR-4425    | hsa-miR-570-5p  | hsa-miR-6848-5p |

|                 |                  |                |                 |
|-----------------|------------------|----------------|-----------------|
| hsa-miR-146b-3p | hsa-miR-4425     | hsa-miR-572 E  | hsa-miR-6849-5p |
| hsa-miR-1470    | hsa-miR-4425     | hsa-miR-572 E  | hsa-miR-6849-5p |
| hsa-miR-1471    | hsa-miR-4425     | hsa-miR-572 E  | hsa-miR-6850-3p |
| hsa-miR-1471    | hsa-miR-4430     | hsa-miR-572 E  | hsa-miR-6850-5p |
| hsa-miR-147a    | hsa-miR-4432     | hsa-miR-572 E  | hsa-miR-6850-5p |
| hsa-miR-147a    | hsa-miR-4433a-3p | hsa-miR-572 E  | hsa-miR-6850-5p |
| hsa-miR-147b    | hsa-miR-4433a-3p | hsa-miR-5739   | hsa-miR-6850-5p |
| hsa-miR-147b    | hsa-miR-4433b-3p | hsa-miR-5739   | hsa-miR-6850-5p |
| hsa-miR-147b    | hsa-miR-4433b-3p | hsa-miR-574-3p | hsa-miR-6851-5p |
| hsa-miR-148b-5p | hsa-miR-4433b-3p | hsa-miR-574-5p | hsa-miR-6851-5p |
| hsa-miR-149-3p  | hsa-miR-4433b-5p | hsa-miR-574-5p | hsa-miR-6851-5p |
| hsa-miR-149-3p  | hsa-miR-4435     | hsa-miR-574-5p | hsa-miR-6851-5p |
| hsa-miR-149-3p  | hsa-miR-4435     | hsa-miR-574-5p | hsa-miR-6851-5p |
| hsa-miR-149-3p  | hsa-miR-4436a    | hsa-miR-575 E  | hsa-miR-6852-3p |
| hsa-miR-149-3p  | hsa-miR-4436a    | hsa-miR-5787   | hsa-miR-6852-3p |
| hsa-miR-149-3p  | hsa-miR-4436b-3p | hsa-miR-5787   | hsa-miR-6852-5p |
| hsa-miR-149-3p  | hsa-miR-4436b-3p | hsa-miR-5787   | hsa-miR-6852-5p |
| hsa-miR-149-5p  | hsa-miR-4436b-3p | hsa-miR-578 E  | hsa-miR-6852-5p |
| hsa-miR-149-5p  | hsa-miR-4436b-3p | hsa-miR-578 E  | hsa-miR-6852-5p |
| hsa-miR-149-5p  | hsa-miR-4436b-3p | hsa-miR-578 E  | hsa-miR-6852-5p |
| hsa-miR-149-5p  | hsa-miR-4436b-3p | hsa-miR-578 E  | hsa-miR-6852-5p |
| hsa-miR-150-3p  | hsa-miR-4436b-5p | hsa-miR-578 E  | hsa-miR-6852-5p |
| hsa-miR-150-3p  | hsa-miR-4436b-5p | hsa-miR-578 E  | hsa-miR-6853-3p |
| hsa-miR-150-3p  | hsa-miR-4437     | hsa-miR-579-3p | hsa-miR-6853-3p |
| hsa-miR-150-3p  | hsa-miR-4437     | hsa-miR-579-5p | hsa-miR-6853-5p |
| hsa-miR-150-3p  | hsa-miR-4439     | hsa-miR-579-5p | hsa-miR-6854-3p |
| hsa-miR-151a-3p | hsa-miR-4440     | hsa-miR-579-5p | hsa-miR-6854-3p |
| hsa-miR-152-3p  | hsa-miR-4440     | hsa-miR-581 E  | hsa-miR-6855-5p |
| hsa-miR-152-5p  | hsa-miR-4440     | hsa-miR-581 E  | hsa-miR-6855-5p |
| hsa-miR-152-5p  | hsa-miR-4440     | hsa-miR-581 E  | hsa-miR-6855-5p |
| hsa-miR-152-5p  | hsa-miR-4440     | hsa-miR-582-5p | hsa-miR-6855-5p |
| hsa-miR-1537-5p | hsa-miR-4440     | hsa-miR-584-3p | hsa-miR-6855-5p |
| hsa-miR-1538    | hsa-miR-4440     | hsa-miR-584-3p | hsa-miR-6856-5p |
| hsa-miR-1538    | hsa-miR-4440     | hsa-miR-584-5p | hsa-miR-6856-5p |
| hsa-miR-1539    | hsa-miR-4440     | hsa-miR-584-5p | hsa-miR-6857-5p |
| hsa-miR-1539    | hsa-miR-4440     | hsa-miR-585-3p | hsa-miR-6857-5p |
| hsa-miR-1539    | hsa-miR-4441     | hsa-miR-585-3p | hsa-miR-6857-5p |
| hsa-miR-1539    | hsa-miR-4441     | hsa-miR-585-3p | hsa-miR-6858-5p |
| hsa-miR-1539    | hsa-miR-4442     | hsa-miR-587 E  | hsa-miR-6858-5p |
| hsa-miR-153-3p  | hsa-miR-4443     | hsa-miR-588 E  | hsa-miR-6859-3p |
| hsa-miR-155-3p  | hsa-miR-4443     | hsa-miR-588 E  | hsa-miR-6859-5p |
| hsa-miR-155-5p  | hsa-miR-4443     | hsa-miR-588 E  | hsa-miR-6860    |
| hsa-miR-1587    | hsa-miR-4443     | hsa-miR-592 E  | hsa-miR-6860    |

|                  |                 |                |                 |
|------------------|-----------------|----------------|-----------------|
| hsa-miR-1587     | hsa-miR-4443    | hsa-miR-592 E  | hsa-miR-6860    |
| hsa-miR-1587     | hsa-miR-4445-5p | hsa-miR-593-3p | hsa-miR-6860    |
| hsa-miR-1587     | hsa-miR-4446-3p | hsa-miR-593-3p | hsa-miR-6860    |
| hsa-miR-1587     | hsa-miR-4446-3p | hsa-miR-593-3p | hsa-miR-6860    |
| hsa-miR-15a-3p   | hsa-miR-4446-3p | hsa-miR-593-3p | hsa-miR-6861-3p |
| hsa-miR-15a-5p   | hsa-miR-4446-3p | hsa-miR-593-5p | hsa-miR-6861-5p |
| hsa-miR-16-1-3p  | hsa-miR-4446-3p | hsa-miR-593-5p | hsa-miR-6861-5p |
| hsa-miR-16-5p    | hsa-miR-4447    | hsa-miR-593-5p | hsa-miR-6861-5p |
| hsa-miR-17-5p    | hsa-miR-4447    | hsa-miR-593-5p | hsa-miR-6861-5p |
| hsa-miR-181a-2-3 | hsa-miR-4447    | hsa-miR-593-5p | hsa-miR-6861-5p |
| hsa-miR-181d-3p  | hsa-miR-4447    | hsa-miR-593-5p | hsa-miR-6861-5p |
| hsa-miR-181d-3p  | hsa-miR-4447    | hsa-miR-596 E  | hsa-miR-6861-5p |
| hsa-miR-1827     | hsa-miR-4447    | hsa-miR-596 E  | hsa-miR-6861-5p |
| hsa-miR-182-3p   | hsa-miR-4447    | hsa-miR-596 E  | hsa-miR-6862-3p |
| hsa-miR-182-5p   | hsa-miR-4448    | hsa-miR-597-3p | hsa-miR-6862-5p |
| hsa-miR-183-3p   | hsa-miR-4448    | hsa-miR-597-3p | hsa-miR-6862-5p |
| hsa-miR-183-5p   | hsa-miR-4448    | hsa-miR-597-3p | hsa-miR-6862-5p |
| hsa-miR-184 E    | hsa-miR-4449    | hsa-miR-597-3p | hsa-miR-6863    |
| hsa-miR-184 E    | hsa-miR-4449    | hsa-miR-597-3p | hsa-miR-6864-5p |
| hsa-miR-185-3p   | hsa-miR-4449    | hsa-miR-597-5p | hsa-miR-6865-5p |
| hsa-miR-185-3p   | hsa-miR-4449    | hsa-miR-598-5p | hsa-miR-6865-5p |
| hsa-miR-185-3p   | hsa-miR-4450    | hsa-miR-598-5p | hsa-miR-6866-5p |
| hsa-miR-185-3p   | hsa-miR-4450    | hsa-miR-598-5p | hsa-miR-6867-3p |
| hsa-miR-185-3p   | hsa-miR-4450    | hsa-miR-600 E  | hsa-miR-6867-5p |
| hsa-miR-185-5p   | hsa-miR-4451    | hsa-miR-601 E  | hsa-miR-6867-5p |
| hsa-miR-185-5p   | hsa-miR-4452    | hsa-miR-601 E  | hsa-miR-6868-3p |
| hsa-miR-187-3p   | hsa-miR-4453    | hsa-miR-601 E  | hsa-miR-6868-3p |
| hsa-miR-187-3p   | hsa-miR-4455    | hsa-miR-601 E  | hsa-miR-6868-3p |
| hsa-miR-187-3p   | hsa-miR-4455    | hsa-miR-602 E  | hsa-miR-6868-3p |
| hsa-miR-187-3p   | hsa-miR-4456    | hsa-miR-602 E  | hsa-miR-6869-5p |
| hsa-miR-187-3p   | hsa-miR-4458    | hsa-miR-604 E  | hsa-miR-6869-5p |
| hsa-miR-187-3p   | hsa-miR-4459    | hsa-miR-604 E  | hsa-miR-6869-5p |
| hsa-miR-187-3p   | hsa-miR-4459    | hsa-miR-6068   | hsa-miR-6870-5p |
| hsa-miR-188-3p   | hsa-miR-4461    | hsa-miR-6068   | hsa-miR-6870-5p |
| hsa-miR-188-5p   | hsa-miR-4462    | hsa-miR-6069   | hsa-miR-6870-5p |
| hsa-miR-188-5p   | hsa-miR-4462    | hsa-miR-6069   | hsa-miR-6870-5p |
| hsa-miR-188-5p   | hsa-miR-4464    | hsa-miR-6069   | hsa-miR-6870-5p |
| hsa-miR-18a-3p   | hsa-miR-4465    | hsa-miR-6069   | hsa-miR-6870-5p |
| hsa-miR-18a-5p   | hsa-miR-4465    | hsa-miR-6069   | hsa-miR-6870-5p |
| hsa-miR-18b-5p   | hsa-miR-4466    | hsa-miR-6070   | hsa-miR-6870-5p |
| hsa-miR-1908-3p  | hsa-miR-4466    | hsa-miR-6070   | hsa-miR-6870-5p |
| hsa-miR-1908-5p  | hsa-miR-4466    | hsa-miR-6071   | hsa-miR-6870-5p |
| hsa-miR-1908-5p  | hsa-miR-4466    | hsa-miR-6071   | hsa-miR-6870-5p |

|                 |                 |              |                   |
|-----------------|-----------------|--------------|-------------------|
| hsa-miR-1908-5p | hsa-miR-4466    | hsa-miR-6071 | hsa-miR-6871-5p   |
| hsa-miR-1908-5p | hsa-miR-4466    | hsa-miR-6073 | hsa-miR-6871-5p   |
| hsa-miR-1908-5p | hsa-miR-4466    | hsa-miR-6074 | hsa-miR-6872-3p   |
| hsa-miR-1908-5p | hsa-miR-4467    | hsa-miR-6074 | hsa-miR-6873-3p   |
| hsa-miR-1908-5p | hsa-miR-4467    | hsa-miR-6075 | hsa-miR-6874-3p   |
| hsa-miR-1909-3p | hsa-miR-4467    | hsa-miR-6076 | hsa-miR-6874-3p   |
| hsa-miR-1909-3p | hsa-miR-4467    | hsa-miR-6078 | hsa-miR-6874-3p   |
| hsa-miR-1909-3p | hsa-miR-4467    | hsa-miR-6081 | hsa-miR-6874-3p   |
| hsa-miR-1909-3p | hsa-miR-4467    | hsa-miR-6081 | hsa-miR-6874-3p   |
| hsa-miR-1909-3p | hsa-miR-4467    | hsa-miR-6081 | hsa-miR-6874-5p   |
| hsa-miR-1909-5p | hsa-miR-4467    | hsa-miR-6081 | hsa-miR-6874-5p   |
| hsa-miR-1910-3p | hsa-miR-4467    | hsa-miR-6081 | hsa-miR-6874-5p   |
| hsa-miR-1910-3p | hsa-miR-4467    | hsa-miR-6081 | hsa-miR-6874-5p   |
| hsa-miR-1910-5p | hsa-miR-4467    | hsa-miR-6081 | hsa-miR-6875-3p   |
| hsa-miR-1911-3p | hsa-miR-4468    | hsa-miR-6084 | hsa-miR-6875-5p   |
| hsa-miR-1911-3p | hsa-miR-4468    | hsa-miR-6084 | hsa-miR-6875-5p   |
| hsa-miR-1913    | hsa-miR-4469    | hsa-miR-6084 | hsa-miR-6875-5p   |
| hsa-miR-1914-3p | hsa-miR-4470    | hsa-miR-6085 | hsa-miR-6876-3p   |
| hsa-miR-1914-3p | hsa-miR-4471    | hsa-miR-6085 | hsa-miR-6876-3p   |
| hsa-miR-1914-5p | hsa-miR-4472    | hsa-miR-6086 | hsa-miR-6876-3p   |
| hsa-miR-1914-5p | hsa-miR-4472    | hsa-miR-6086 | hsa-miR-6876-3p   |
| hsa-miR-1915-3p | hsa-miR-4472    | hsa-miR-6086 | hsa-miR-6876-3p   |
| hsa-miR-1915-3p | hsa-miR-4472    | hsa-miR-6086 | hsa-miR-6876-3p   |
| hsa-miR-1915-3p | hsa-miR-4472    | hsa-miR-6086 | hsa-miR-6876-5p   |
| hsa-miR-1915-3p | hsa-miR-4472    | hsa-miR-6086 | hsa-miR-6877-3p   |
| hsa-miR-1915-5p | hsa-miR-4472    | hsa-miR-6086 | hsa-miR-6877-5p   |
| hsa-miR-1915-5p | hsa-miR-4474-3p | hsa-miR-6087 | hsa-miR-6877-5p   |
| hsa-miR-1915-5p | hsa-miR-4474-3p | hsa-miR-6087 | hsa-miR-6877-5p   |
| hsa-miR-191-3p  | hsa-miR-4476    | hsa-miR-6087 | hsa-miR-6877-5p   |
| hsa-miR-193a-5p | hsa-miR-4476    | hsa-miR-6087 | hsa-miR-6878-3p   |
| hsa-miR-193a-5p | hsa-miR-4478    | hsa-miR-6087 | hsa-miR-6878-3p   |
| hsa-miR-193a-5p | hsa-miR-4478    | hsa-miR-6087 | hsa-miR-6878-5p   |
| hsa-miR-193a-5p | hsa-miR-4479    | hsa-miR-6088 | hsa-miR-6879-3p   |
| hsa-miR-193a-5p | hsa-miR-4479    | hsa-miR-6089 | hsa-miR-6879-3p   |
| hsa-miR-193a-5p | hsa-miR-4479    | hsa-miR-6089 | hsa-miR-6879-5p   |
| hsa-miR-193b-5p | hsa-miR-4481    | hsa-miR-6089 | hsa-miR-6879-5p   |
| hsa-miR-193b-5p | hsa-miR-4481    | hsa-miR-6089 | hsa-miR-6879-5p   |
| hsa-miR-193b-5p | hsa-miR-4481    | hsa-miR-608  | E hsa-miR-6879-5p |
| hsa-miR-193b-5p | hsa-miR-4482-3p | hsa-miR-608  | E hsa-miR-6880-5p |
| hsa-miR-193b-5p | hsa-miR-4482-3p | hsa-miR-608  | E hsa-miR-6880-5p |
| hsa-miR-194-3p  | hsa-miR-4482-5p | hsa-miR-608  | E hsa-miR-6880-5p |
| hsa-miR-194-3p  | hsa-miR-4483    | hsa-miR-608  | E hsa-miR-6880-5p |
| hsa-miR-194-3p  | hsa-miR-4483    | hsa-miR-608  | E hsa-miR-6880-5p |

|                  |                 |                |                 |
|------------------|-----------------|----------------|-----------------|
| hsa-miR-195-5p   | hsa-miR-4483    | hsa-miR-608 E  | hsa-miR-6881-3p |
| hsa-miR-196a-5p  | hsa-miR-4483    | hsa-miR-608 E  | hsa-miR-6881-5p |
| hsa-miR-196a-5p  | hsa-miR-4483    | hsa-miR-608 E  | hsa-miR-6881-5p |
| hsa-miR-196a-5p  | hsa-miR-4483    | hsa-miR-6090   | hsa-miR-6881-5p |
| hsa-miR-196b-3p  | hsa-miR-4483    | hsa-miR-6090   | hsa-miR-6881-5p |
| hsa-miR-196b-5p  | hsa-miR-4483    | hsa-miR-6090   | hsa-miR-6881-5p |
| hsa-miR-1972     | hsa-miR-4485-5p | hsa-miR-609 E  | hsa-miR-6881-5p |
| hsa-miR-1973     | hsa-miR-4486    | hsa-miR-611 E  | hsa-miR-6881-5p |
| hsa-miR-1976     | hsa-miR-4486    | hsa-miR-611 E  | hsa-miR-6882-3p |
| hsa-miR-197-5p   | hsa-miR-4486    | hsa-miR-6126   | hsa-miR-6883-3p |
| hsa-miR-197-5p   | hsa-miR-4486    | hsa-miR-6127   | hsa-miR-6883-3p |
| hsa-miR-197-5p   | hsa-miR-4486    | hsa-miR-6127   | hsa-miR-6883-5p |
| hsa-miR-197-5p   | hsa-miR-4486    | hsa-miR-6129   | hsa-miR-6883-5p |
| hsa-miR-198 E    | hsa-miR-4487    | hsa-miR-6129   | hsa-miR-6883-5p |
| hsa-miR-199a-3p  | hsa-miR-4487    | hsa-miR-6129   | hsa-miR-6883-5p |
| hsa-miR-199a-3p  | hsa-miR-4488    | hsa-miR-612 E  | hsa-miR-6883-5p |
| hsa-miR-199b-3p  | hsa-miR-4488    | hsa-miR-612 E  | hsa-miR-6883-5p |
| hsa-miR-199b-3p  | hsa-miR-4488    | hsa-miR-612 E  | hsa-miR-6884-5p |
| hsa-miR-19a-5p   | hsa-miR-4488    | hsa-miR-612 E  | hsa-miR-6884-5p |
| hsa-miR-19b-1-5p | hsa-miR-4488    | hsa-miR-6130   | hsa-miR-6885-3p |
| hsa-miR-19b-1-5p | hsa-miR-4488    | hsa-miR-6130   | hsa-miR-6885-3p |
| hsa-miR-19b-1-5p | hsa-miR-4489    | hsa-miR-6130   | hsa-miR-6885-3p |
| hsa-miR-19b-1-5p | hsa-miR-4489    | hsa-miR-6131   | hsa-miR-6885-5p |
| hsa-miR-19b-2-5p | hsa-miR-4489    | hsa-miR-6131   | hsa-miR-6885-5p |
| hsa-miR-19b-2-5p | hsa-miR-4489    | hsa-miR-6131   | hsa-miR-6885-5p |
| hsa-miR-19b-2-5p | hsa-miR-448 E   | hsa-miR-6131   | hsa-miR-6886-5p |
| hsa-miR-19b-2-5p | hsa-miR-4490    | hsa-miR-6131   | hsa-miR-6886-5p |
| hsa-miR-19b-3p   | hsa-miR-4490    | hsa-miR-6132   | hsa-miR-6887-5p |
| hsa-miR-1-5p     | hsa-miR-4490    | hsa-miR-6132   | hsa-miR-6887-5p |
| hsa-miR-200b-5p  | hsa-miR-4492    | hsa-miR-6132   | hsa-miR-6887-5p |
| hsa-miR-200c-5p  | hsa-miR-4492    | hsa-miR-6132   | hsa-miR-6887-5p |
| hsa-miR-200c-5p  | hsa-miR-4494    | hsa-miR-6133   | hsa-miR-6887-5p |
| hsa-miR-202-3p   | hsa-miR-4494    | hsa-miR-6133   | hsa-miR-6888-3p |
| hsa-miR-202-5p   | hsa-miR-4494    | hsa-miR-6134   | hsa-miR-6888-3p |
| hsa-miR-202-5p   | hsa-miR-4496    | hsa-miR-6134   | hsa-miR-6888-3p |
| hsa-miR-203a-3p  | hsa-miR-4497    | hsa-miR-6134   | hsa-miR-6888-5p |
| hsa-miR-204-3p   | hsa-miR-4497    | hsa-miR-6134   | hsa-miR-6889-5p |
| hsa-miR-204-3p   | hsa-miR-4497    | hsa-miR-615-3p | hsa-miR-6889-5p |
| hsa-miR-204-5p   | hsa-miR-4498    | hsa-miR-615-5p | hsa-miR-6889-5p |
| hsa-miR-205-3p   | hsa-miR-4498    | hsa-miR-615-5p | hsa-miR-6890-3p |
| hsa-miR-205-5p   | hsa-miR-4498    | hsa-miR-615-5p | hsa-miR-6890-5p |
| hsa-miR-20a-5p   | hsa-miR-4498    | hsa-miR-6165   | hsa-miR-6890-5p |
| hsa-miR-20b-3p   | hsa-miR-4498    | hsa-miR-6165   | hsa-miR-6891-5p |

|                  |                 |                |                 |
|------------------|-----------------|----------------|-----------------|
| hsa-miR-210-3p   | hsa-miR-4498    | hsa-miR-6165   | hsa-miR-6892-3p |
| hsa-miR-210-3p   | hsa-miR-4498    | hsa-miR-616-3p | hsa-miR-6892-3p |
| hsa-miR-210-5p   | hsa-miR-4498    | hsa-miR-616-3p | hsa-miR-6893-5p |
| hsa-miR-2110     | hsa-miR-449a    | hsa-miR-619-3p | hsa-miR-6893-5p |
| hsa-miR-2110     | hsa-miR-449a    | hsa-miR-619-5p | hsa-miR-6893-5p |
| hsa-miR-2110     | hsa-miR-449a    | hsa-miR-619-5p | hsa-miR-6894-3p |
| hsa-miR-2113     | hsa-miR-449a    | hsa-miR-619-5p | hsa-miR-6894-5p |
| hsa-miR-2113     | hsa-miR-449a    | hsa-miR-619-5p | hsa-miR-6894-5p |
| hsa-miR-2114-3p  | hsa-miR-449a    | hsa-miR-622 E  | hsa-miR-6895-3p |
| hsa-miR-2116-5p  | hsa-miR-449a    | hsa-miR-622 E  | hsa-miR-6895-3p |
| hsa-miR-2116-5p  | hsa-miR-449b-5p | hsa-miR-623 E  | hsa-miR-708-5p  |
| hsa-miR-2116-5p  | hsa-miR-449b-5p | hsa-miR-623 E  | hsa-miR-7106-5p |
| hsa-miR-2116-5p  | hsa-miR-449b-5p | hsa-miR-623 E  | hsa-miR-7106-5p |
| hsa-miR-2116-5p  | hsa-miR-449b-5p | hsa-miR-623 E  | hsa-miR-7106-5p |
| hsa-miR-2117     | hsa-miR-449b-5p | hsa-miR-624-3p | hsa-miR-7106-5p |
| hsa-miR-2117     | hsa-miR-449b-5p | hsa-miR-625-5p | hsa-miR-7106-5p |
| hsa-miR-212-5p   | hsa-miR-449b-5p | hsa-miR-626 E  | hsa-miR-7106-5p |
| hsa-miR-212-5p   | hsa-miR-449b-5p | hsa-miR-627-3p | hsa-miR-7107-3p |
| hsa-miR-212-5p   | hsa-miR-449b-5p | hsa-miR-627-3p | hsa-miR-7107-3p |
| hsa-miR-214-5p   | hsa-miR-449c-3p | hsa-miR-627-5p | hsa-miR-7107-3p |
| hsa-miR-214-5p   | hsa-miR-449c-3p | hsa-miR-629-3p | hsa-miR-7107-3p |
| hsa-miR-214-5p   | hsa-miR-449c-3p | hsa-miR-629-5p | hsa-miR-7107-5p |
| hsa-miR-218-1-3p | hsa-miR-449c-3p | hsa-miR-629-5p | hsa-miR-7107-5p |
| hsa-miR-218-1-3p | hsa-miR-449c-5p | hsa-miR-629-5p | hsa-miR-7107-5p |
| hsa-miR-218-1-3p | hsa-miR-449c-5p | hsa-miR-630 E  | hsa-miR-7107-5p |
| hsa-miR-218-1-3p | hsa-miR-449c-5p | hsa-miR-632 E  | hsa-miR-7108-5p |
| hsa-miR-218-2-3p | hsa-miR-449c-5p | hsa-miR-632 E  | hsa-miR-7108-5p |
| hsa-miR-218-2-3p | hsa-miR-449c-5p | hsa-miR-632 E  | hsa-miR-7108-5p |
| hsa-miR-218-2-3p | hsa-miR-4500    | hsa-miR-632 E  | hsa-miR-7109-5p |
| hsa-miR-219a-1-3 | hsa-miR-4500    | hsa-miR-636 E  | hsa-miR-7109-5p |
| hsa-miR-219b-5p  | hsa-miR-4502    | hsa-miR-636 E  | hsa-miR-7109-5p |
| hsa-miR-221-3p   | hsa-miR-4502    | hsa-miR-636 E  | hsa-miR-7109-5p |
| hsa-miR-221-5p   | hsa-miR-4502    | hsa-miR-637 E  | hsa-miR-7109-5p |
| hsa-miR-223-3p   | hsa-miR-4502    | hsa-miR-637 E  | hsa-miR-7109-5p |
| hsa-miR-2277-3p  | hsa-miR-4505    | hsa-miR-637 E  | hsa-miR-7109-5p |
| hsa-miR-2277-5p  | hsa-miR-4505    | hsa-miR-637 E  | hsa-miR-7110-3p |
| hsa-miR-2277-5p  | hsa-miR-4505    | hsa-miR-637 E  | hsa-miR-7110-3p |
| hsa-miR-2277-5p  | hsa-miR-4505    | hsa-miR-637 E  | hsa-miR-7110-5p |
| hsa-miR-2277-5p  | hsa-miR-4505    | hsa-miR-638 E  | hsa-miR-7110-5p |
| hsa-miR-2277-5p  | hsa-miR-4506    | hsa-miR-638 E  | hsa-miR-7110-5p |
| hsa-miR-2278     | hsa-miR-4507    | hsa-miR-638 E  | hsa-miR-7110-5p |
| hsa-miR-2278     | hsa-miR-4507    | hsa-miR-638 E  | hsa-miR-7110-5p |
| hsa-miR-2278     | hsa-miR-4507    | hsa-miR-639 E  | hsa-miR-7110-5p |

|                 |                  |                  |                 |
|-----------------|------------------|------------------|-----------------|
| hsa-miR-2278    | hsa-miR-4507     | hsa-miR-639 E    | hsa-miR-7110-5p |
| hsa-miR-2278    | hsa-miR-4507     | hsa-miR-643 E    | hsa-miR-7110-5p |
| hsa-miR-2355-3p | hsa-miR-4507     | hsa-miR-645 E    | hsa-miR-7110-5p |
| hsa-miR-2355-3p | hsa-miR-4507     | hsa-miR-645 E    | hsa-miR-7110-5p |
| hsa-miR-2355-3p | hsa-miR-4507     | hsa-miR-645 E    | hsa-miR-7110-5p |
| hsa-miR-2355-3p | hsa-miR-4507     | hsa-miR-647 E    | hsa-miR-7111-5p |
| hsa-miR-2355-3p | hsa-miR-4507     | hsa-miR-647 E    | hsa-miR-7111-5p |
| hsa-miR-2392    | hsa-miR-4508     | hsa-miR-647 E    | hsa-miR-7111-5p |
| hsa-miR-2392    | hsa-miR-4508     | hsa-miR-648 E    | hsa-miR-7111-5p |
| hsa-miR-23a-5p  | hsa-miR-4508     | hsa-miR-648 E    | hsa-miR-7112-3p |
| hsa-miR-23a-5p  | hsa-miR-4508     | hsa-miR-648 E    | hsa-miR-7112-3p |
| hsa-miR-23a-5p  | hsa-miR-450b-3p  | hsa-miR-6499-3p  | hsa-miR-7112-5p |
| hsa-miR-23b-5p  | hsa-miR-450b-3p  | hsa-miR-6499-3p  | hsa-miR-7113-3p |
| hsa-miR-23b-5p  | hsa-miR-4510     | hsa-miR-6499-5p  | hsa-miR-7113-5p |
| hsa-miR-2467-3p | hsa-miR-4510     | hsa-miR-6499-5p  | hsa-miR-7114-5p |
| hsa-miR-2467-3p | hsa-miR-4510     | hsa-miR-6499-5p  | hsa-miR-7114-5p |
| hsa-miR-2467-3p | hsa-miR-4510     | hsa-miR-6500-3p  | hsa-miR-7114-5p |
| hsa-miR-2467-5p | hsa-miR-4514     | hsa-miR-6500-3p  | hsa-miR-7114-5p |
| hsa-miR-2467-5p | hsa-miR-4515     | hsa-miR-6500-3p  | hsa-miR-7114-5p |
| hsa-miR-2467-5p | hsa-miR-4518     | hsa-miR-6500-3p  | hsa-miR-7114-5p |
| hsa-miR-2467-5p | hsa-miR-4518     | hsa-miR-6500-5p  | hsa-miR-711 E   |
| hsa-miR-24-1-5p | hsa-miR-4518     | hsa-miR-6501-3p  | hsa-miR-711 E   |
| hsa-miR-24-3p   | hsa-miR-4519     | hsa-miR-6501-3p  | hsa-miR-711 E   |
| hsa-miR-25-5p   | hsa-miR-4520-3p  | hsa-miR-6501-5p  | hsa-miR-7150    |
| hsa-miR-25-5p   | hsa-miR-4520-5p  | hsa-miR-6501-5p  | hsa-miR-7150    |
| hsa-miR-25-5p   | hsa-miR-4520-5p  | hsa-miR-6501-5p  | hsa-miR-7150    |
| hsa-miR-25-5p   | hsa-miR-4520-5p  | hsa-miR-6503-5p  | hsa-miR-7151-3p |
| hsa-miR-25-5p   | hsa-miR-4521     | hsa-miR-6504-5p  | hsa-miR-7151-3p |
| hsa-miR-25-5p   | hsa-miR-4521     | hsa-miR-6504-5p  | hsa-miR-7151-3p |
| hsa-miR-25-5p   | hsa-miR-4524a-3p | hsa-miR-6504-5p  | hsa-miR-7152-3p |
| hsa-miR-25-5p   | hsa-miR-4524a-3p | hsa-miR-6505-3p  | hsa-miR-7152-3p |
| hsa-miR-2682-5p | hsa-miR-4524b-3p | hsa-miR-6506-5p  | hsa-miR-7152-3p |
| hsa-miR-2682-5p | hsa-miR-4525     | hsa-miR-6508-5p  | hsa-miR-7152-3p |
| hsa-miR-2682-5p | hsa-miR-4525     | hsa-miR-650 E    | hsa-miR-7152-5p |
| hsa-miR-2682-5p | hsa-miR-4525     | hsa-miR-650 E    | hsa-miR-7152-5p |
| hsa-miR-26a-5p  | hsa-miR-4525     | hsa-miR-650 E    | hsa-miR-7152-5p |
| hsa-miR-26b-3p  | hsa-miR-4525     | hsa-miR-650 E    | hsa-miR-7152-5p |
| hsa-miR-26b-3p  | hsa-miR-4525     | hsa-miR-6510-3p  | hsa-miR-7154-3p |
| hsa-miR-26b-3p  | hsa-miR-4525     | hsa-miR-6510-5p  | hsa-miR-7154-3p |
| hsa-miR-27a-5p  | hsa-miR-4529-3p  | hsa-miR-6511a-5p | hsa-miR-7154-3p |
| hsa-miR-2861    | hsa-miR-4530     | hsa-miR-6511a-5p | hsa-miR-7154-5p |
| hsa-miR-2861    | hsa-miR-4530     | hsa-miR-6513-5p  | hsa-miR-7154-5p |
| hsa-miR-2861    | hsa-miR-4532     | hsa-miR-6513-5p  | hsa-miR-7155-3p |

|                  |                 |                 |                 |
|------------------|-----------------|-----------------|-----------------|
| hsa-miR-2861     | hsa-miR-4532    | hsa-miR-6515-3p | hsa-miR-7155-3p |
| hsa-miR-2861     | hsa-miR-4534    | hsa-miR-6515-5p | hsa-miR-7155-5p |
| hsa-miR-28-3p    | hsa-miR-4534    | hsa-miR-6515-5p | hsa-miR-7155-5p |
| hsa-miR-296-3p   | hsa-miR-4534    | hsa-miR-6515-5p | hsa-miR-7155-5p |
| hsa-miR-296-3p   | hsa-miR-4534    | hsa-miR-6516-3p | hsa-miR-7155-5p |
| hsa-miR-296-3p   | hsa-miR-4535    | hsa-miR-653-3p  | hsa-miR-7155-5p |
| hsa-miR-296-3p   | hsa-miR-4535    | hsa-miR-653-3p  | hsa-miR-7155-5p |
| hsa-miR-296-3p   | hsa-miR-4536-5p | hsa-miR-654-5p  | hsa-miR-7156-3p |
| hsa-miR-296-3p   | hsa-miR-4537    | hsa-miR-654-5p  | hsa-miR-7157-3p |
| hsa-miR-296-3p   | hsa-miR-4538    | hsa-miR-654-5p  | hsa-miR-7157-3p |
| hsa-miR-296-3p   | hsa-miR-4538    | hsa-miR-654-5p  | hsa-miR-7157-5p |
| hsa-miR-297 E    | hsa-miR-4538    | hsa-miR-654-5p  | hsa-miR-7157-5p |
| hsa-miR-297 E    | hsa-miR-4538    | hsa-miR-654-5p  | hsa-miR-7157-5p |
| hsa-miR-298 E    | hsa-miR-455-3p  | hsa-miR-654-5p  | hsa-miR-7160-3p |
| hsa-miR-298 E    | hsa-miR-455-3p  | hsa-miR-656-5p  | hsa-miR-7160-3p |
| hsa-miR-299-3p   | hsa-miR-455-5p  | hsa-miR-656-5p  | hsa-miR-7160-3p |
| hsa-miR-299-5p   | hsa-miR-4632-3p | hsa-miR-656-5p  | hsa-miR-7160-5p |
| hsa-miR-29a-5p   | hsa-miR-4632-5p | hsa-miR-656-5p  | hsa-miR-7160-5p |
| hsa-miR-29b-1-5p | hsa-miR-4632-5p | hsa-miR-656-5p  | hsa-miR-7161-3p |
| hsa-miR-29b-1-5p | hsa-miR-4632-5p | hsa-miR-657 E   | hsa-miR-7161-5p |
| hsa-miR-29b-1-5p | hsa-miR-4632-5p | hsa-miR-657 E   | hsa-miR-7162-3p |
| hsa-miR-29b-1-5p | hsa-miR-4632-5p | hsa-miR-658 E   | hsa-miR-7162-5p |
| hsa-miR-29b-1-5p | hsa-miR-4632-5p | hsa-miR-658 E   | hsa-miR-7162-5p |
| hsa-miR-29b-2-5p | hsa-miR-4633-3p | hsa-miR-658 E   | hsa-miR-718 E   |
| hsa-miR-29b-2-5p | hsa-miR-4634    | hsa-miR-658 E   | hsa-miR-744-3p  |
| hsa-miR-29c-5p   | hsa-miR-4634    | hsa-miR-658 E   | hsa-miR-744-3p  |
| hsa-miR-301b-5p  | hsa-miR-4634    | hsa-miR-658 E   | hsa-miR-744-5p  |
| hsa-miR-301b-5p  | hsa-miR-4635    | hsa-miR-658 E   | hsa-miR-744-5p  |
| hsa-miR-301b-5p  | hsa-miR-4638-3p | hsa-miR-658 E   | hsa-miR-744-5p  |
| hsa-miR-3064-5p  | hsa-miR-4638-3p | hsa-miR-658 E   | hsa-miR-744-5p  |
| hsa-miR-3064-5p  | hsa-miR-4638-5p | hsa-miR-658 E   | hsa-miR-7515    |
| hsa-miR-3064-5p  | hsa-miR-4640-5p | hsa-miR-658 E   | hsa-miR-758-3p  |
| hsa-miR-3064-5p  | hsa-miR-4640-5p | hsa-miR-659-3p  | hsa-miR-758-3p  |
| hsa-miR-3064-5p  | hsa-miR-4640-5p | hsa-miR-659-3p  | hsa-miR-758-3p  |
| hsa-miR-3064-5p  | hsa-miR-4641    | hsa-miR-659-3p  | hsa-miR-758-5p  |
| hsa-miR-3074-5p  | hsa-miR-4642    | hsa-miR-659-5p  | hsa-miR-760 E   |
| hsa-miR-3074-5p  | hsa-miR-4642    | hsa-miR-660-3p  | hsa-miR-760 E   |
| hsa-miR-3074-5p  | hsa-miR-4642    | hsa-miR-661 E   | hsa-miR-760 E   |
| hsa-miR-3074-5p  | hsa-miR-4646-3p | hsa-miR-661 E   | hsa-miR-760 E   |
| hsa-miR-3074-5p  | hsa-miR-4646-3p | hsa-miR-661 E   | hsa-miR-760 E   |
| hsa-miR-30b-3p   | hsa-miR-4646-5p | hsa-miR-662 E   | hsa-miR-760 E   |
| hsa-miR-30b-3p   | hsa-miR-4647    | hsa-miR-663a    | hsa-miR-760 E   |
| hsa-miR-30b-3p   | hsa-miR-4648    | hsa-miR-663a    | hsa-miR-761 E   |

|                  |                 |                  |                 |   |
|------------------|-----------------|------------------|-----------------|---|
| hsa-miR-30b-3p   | hsa-miR-4648    | hsa-miR-663a     | hsa-miR-761     | E |
| hsa-miR-30b-3p   | hsa-miR-4648    | hsa-miR-663a     | hsa-miR-761     | E |
| hsa-miR-30b-3p   | hsa-miR-4649-3p | hsa-miR-663a     | hsa-miR-762     | E |
| hsa-miR-30b-3p   | hsa-miR-4649-3p | hsa-miR-663a     | hsa-miR-762     | E |
| hsa-miR-30c-1-3p | hsa-miR-4649-5p | hsa-miR-663b     | hsa-miR-762     | E |
| hsa-miR-30c-1-3p | hsa-miR-4649-5p | hsa-miR-663b     | hsa-miR-762     | E |
| hsa-miR-30c-1-3p | hsa-miR-4649-5p | hsa-miR-663b     | hsa-miR-762     | E |
| hsa-miR-30c-1-3p | hsa-miR-4649-5p | hsa-miR-663b     | hsa-miR-762     | E |
| hsa-miR-30c-1-3p | hsa-miR-4649-5p | hsa-miR-664a-5p  | hsa-miR-762     | E |
| hsa-miR-30c-2-3p | hsa-miR-4649-5p | hsa-miR-664b-3p  | hsa-miR-762     | E |
| hsa-miR-30c-2-3p | hsa-miR-4649-5p | hsa-miR-664b-3p  | hsa-miR-764     | E |
| hsa-miR-30c-2-3p | hsa-miR-4649-5p | hsa-miR-664b-5p  | hsa-miR-764     | E |
| hsa-miR-30c-2-3p | hsa-miR-4649-5p | hsa-miR-668-3p   | hsa-miR-764     | E |
| hsa-miR-30d-3p   | hsa-miR-4649-5p | hsa-miR-668-5p   | hsa-miR-764     | E |
| hsa-miR-30d-3p   | hsa-miR-4651    | hsa-miR-668-5p   | hsa-miR-764     | E |
| hsa-miR-3116     | hsa-miR-4651    | hsa-miR-668-5p   | hsa-miR-764     | E |
| hsa-miR-3116     | hsa-miR-4651    | hsa-miR-670-5p   | hsa-miR-765     | E |
| hsa-miR-3116     | hsa-miR-4651    | hsa-miR-670-5p   | hsa-miR-765     | E |
| hsa-miR-3117-3p  | hsa-miR-4651    | hsa-miR-670-5p   | hsa-miR-766-5p  |   |
| hsa-miR-3120-5p  | hsa-miR-4651    | hsa-miR-6715a-3p | hsa-miR-766-5p  |   |
| hsa-miR-3120-5p  | hsa-miR-4651    | hsa-miR-6715b-5p | hsa-miR-767-3p  |   |
| hsa-miR-3120-5p  | hsa-miR-4651    | hsa-miR-6716-5p  | hsa-miR-767-5p  |   |
| hsa-miR-3121-3p  | hsa-miR-4651    | hsa-miR-6716-5p  | hsa-miR-767-5p  |   |
| hsa-miR-3121-5p  | hsa-miR-4651    | hsa-miR-6717-5p  | hsa-miR-767-5p  |   |
| hsa-miR-3122     | hsa-miR-4652-3p | hsa-miR-6717-5p  | hsa-miR-767-5p  |   |
| hsa-miR-3122     | hsa-miR-4652-3p | hsa-miR-6717-5p  | hsa-miR-769-3p  |   |
| hsa-miR-3122     | hsa-miR-4652-3p | hsa-miR-6717-5p  | hsa-miR-769-3p  |   |
| hsa-miR-3122     | hsa-miR-4653-3p | hsa-miR-6717-5p  | hsa-miR-7703    |   |
| hsa-miR-3124-3p  | hsa-miR-4653-3p | hsa-miR-6717-5p  | hsa-miR-7703    |   |
| hsa-miR-3124-5p  | hsa-miR-4653-3p | hsa-miR-6718-5p  | hsa-miR-7703    |   |
| hsa-miR-3127-3p  | hsa-miR-4653-3p | hsa-miR-6718-5p  | hsa-miR-7704    |   |
| hsa-miR-3127-3p  | hsa-miR-4653-5p | hsa-miR-671-3p   | hsa-miR-7704    |   |
| hsa-miR-3127-5p  | hsa-miR-4653-5p | hsa-miR-671-5p   | hsa-miR-7704    |   |
| hsa-miR-3128     | hsa-miR-4653-5p | hsa-miR-6720-3p  | hsa-miR-7704    |   |
| hsa-miR-3129-5p  | hsa-miR-4653-5p | hsa-miR-6720-3p  | hsa-miR-7704    |   |
| hsa-miR-3129-5p  | hsa-miR-4654    | hsa-miR-6720-5p  | hsa-miR-7704    |   |
| hsa-miR-3129-5p  | hsa-miR-4654    | hsa-miR-6721-5p  | hsa-miR-7704    |   |
| hsa-miR-3130-3p  | hsa-miR-4654    | hsa-miR-6721-5p  | hsa-miR-7706    |   |
| hsa-miR-3130-3p  | hsa-miR-4654    | hsa-miR-6721-5p  | hsa-miR-7706    |   |
| hsa-miR-3131     | hsa-miR-4655-3p | hsa-miR-6721-5p  | hsa-miR-770-5p  |   |
| hsa-miR-3131     | hsa-miR-4655-5p | hsa-miR-6721-5p  | hsa-miR-770-5p  |   |
| hsa-miR-3132     | hsa-miR-4656    | hsa-miR-6721-5p  | hsa-miR-770-5p  |   |
| hsa-miR-3132     | hsa-miR-4656    | hsa-miR-6721-5p  | hsa-miR-7843-5p |   |

|                  |                  |                 |                 |
|------------------|------------------|-----------------|-----------------|
| hsa-miR-3132     | hsa-miR-4656     | hsa-miR-6722-3p | hsa-miR-7843-5p |
| hsa-miR-3132     | hsa-miR-4657     | hsa-miR-6722-3p | hsa-miR-7843-5p |
| hsa-miR-3135a    | hsa-miR-4658     | hsa-miR-6722-3p | hsa-miR-7843-5p |
| hsa-miR-3135a    | hsa-miR-4658     | hsa-miR-6722-3p | hsa-miR-7843-5p |
| hsa-miR-3135a    | hsa-miR-4658     | hsa-miR-6722-3p | hsa-miR-7845-5p |
| hsa-miR-3135a    | hsa-miR-4658     | hsa-miR-6722-3p | hsa-miR-7845-5p |
| hsa-miR-3135a    | hsa-miR-4659a-3p | hsa-miR-6722-3p | hsa-miR-7846-3p |
| hsa-miR-3135b    | hsa-miR-4659b-3p | hsa-miR-6722-5p | hsa-miR-7846-3p |
| hsa-miR-3135b    | hsa-miR-4660     | hsa-miR-6723-5p | hsa-miR-7847-3p |
| hsa-miR-3135b    | hsa-miR-4660     | hsa-miR-6724-5p | hsa-miR-7847-3p |
| hsa-miR-3135b    | hsa-miR-4660     | hsa-miR-6724-5p | hsa-miR-7847-3p |
| hsa-miR-3135b    | hsa-miR-4661-3p  | hsa-miR-6724-5p | hsa-miR-7847-3p |
| hsa-miR-3135b    | hsa-miR-4664-5p  | hsa-miR-6724-5p | hsa-miR-7847-3p |
| hsa-miR-3136-5p  | hsa-miR-4664-5p  | hsa-miR-6724-5p | hsa-miR-7847-3p |
| hsa-miR-3137     | hsa-miR-4664-5p  | hsa-miR-6726-3p | hsa-miR-7849-3p |
| hsa-miR-3137     | hsa-miR-4664-5p  | hsa-miR-6726-5p | hsa-miR-7850-5p |
| hsa-miR-3137     | hsa-miR-4664-5p  | hsa-miR-6726-5p | hsa-miR-7850-5p |
| hsa-miR-3137     | hsa-miR-4664-5p  | hsa-miR-6726-5p | hsa-miR-7850-5p |
| hsa-miR-3137     | hsa-miR-4665-5p  | hsa-miR-6727-3p | hsa-miR-7850-5p |
| hsa-miR-3138     | hsa-miR-4665-5p  | hsa-miR-6727-5p | hsa-miR-7850-5p |
| hsa-miR-3138     | hsa-miR-4665-5p  | hsa-miR-6727-5p | hsa-miR-7850-5p |
| hsa-miR-3139     | hsa-miR-4665-5p  | hsa-miR-6727-5p | hsa-miR-7850-5p |
| hsa-miR-3140-3p  | hsa-miR-4665-5p  | hsa-miR-6727-5p | hsa-miR-7851-3p |
| hsa-miR-3140-3p  | hsa-miR-4665-5p  | hsa-miR-6727-5p | hsa-miR-7854-3p |
| hsa-miR-3140-3p  | hsa-miR-4665-5p  | hsa-miR-6727-5p | hsa-miR-7854-3p |
| hsa-miR-3141     | hsa-miR-4665-5p  | hsa-miR-6728-3p | hsa-miR-7856-5p |
| hsa-miR-3141     | hsa-miR-4666b    | hsa-miR-6728-3p | hsa-miR-7974    |
| hsa-miR-3144-3p  | hsa-miR-4667-3p  | hsa-miR-6728-3p | hsa-miR-7974    |
| hsa-miR-3146     | hsa-miR-4667-5p  | hsa-miR-6728-3p | hsa-miR-7974    |
| hsa-miR-3147     | hsa-miR-4667-5p  | hsa-miR-6728-5p | hsa-miR-7974    |
| hsa-miR-3147     | hsa-miR-4669     | hsa-miR-6728-5p | hsa-miR-7974    |
| hsa-miR-3147     | hsa-miR-4669     | hsa-miR-6729-5p | hsa-miR-7975    |
| hsa-miR-3147     | hsa-miR-4669     | hsa-miR-6729-5p | hsa-miR-7976    |
| hsa-miR-3147     | hsa-miR-4669     | hsa-miR-6729-5p | hsa-miR-7976    |
| hsa-miR-3147     | hsa-miR-4669     | hsa-miR-6730-5p | hsa-miR-7976    |
| hsa-miR-3147     | hsa-miR-4670-5p  | hsa-miR-6731-3p | hsa-miR-7978    |
| hsa-miR-3147     | hsa-miR-4671-5p  | hsa-miR-6731-5p | hsa-miR-7978    |
| hsa-miR-3147     | hsa-miR-4672     | hsa-miR-6731-5p | hsa-miR-7978    |
| hsa-miR-3149     | hsa-miR-4674     | hsa-miR-6731-5p | hsa-miR-7978    |
| hsa-miR-3150a-3p | hsa-miR-4674     | hsa-miR-6731-5p | hsa-miR-7-5p    |
| hsa-miR-3150a-3p | hsa-miR-4674     | hsa-miR-6732-5p | hsa-miR-8052    |
| hsa-miR-3150a-3p | hsa-miR-4675     | hsa-miR-6732-5p | hsa-miR-8052    |
| hsa-miR-3150b-3p | hsa-miR-4675     | hsa-miR-6733-3p | hsa-miR-8052    |

|                  |                 |                 |              |
|------------------|-----------------|-----------------|--------------|
| hsa-miR-3150b-3p | hsa-miR-4675    | hsa-miR-6733-3p | hsa-miR-8056 |
| hsa-miR-3151-3p  | hsa-miR-4675    | hsa-miR-6733-3p | hsa-miR-8056 |
| hsa-miR-3151-3p  | hsa-miR-4675    | hsa-miR-6734-3p | hsa-miR-8056 |
| hsa-miR-3151-5p  | hsa-miR-4675    | hsa-miR-6734-5p | hsa-miR-8057 |
| hsa-miR-3151-5p  | hsa-miR-4675    | hsa-miR-6734-5p | hsa-miR-8057 |
| hsa-miR-3151-5p  | hsa-miR-4675    | hsa-miR-6734-5p | hsa-miR-8057 |
| hsa-miR-3151-5p  | hsa-miR-4675    | hsa-miR-6734-5p | hsa-miR-8058 |
| hsa-miR-3151-5p  | hsa-miR-4676-3p | hsa-miR-6735-3p | hsa-miR-8059 |
| hsa-miR-3151-5p  | hsa-miR-4676-5p | hsa-miR-6735-3p | hsa-miR-8060 |
| hsa-miR-3152-3p  | hsa-miR-4677-3p | hsa-miR-6735-3p | hsa-miR-8062 |
| hsa-miR-3154     | hsa-miR-4677-5p | hsa-miR-6735-3p | hsa-miR-8064 |
| hsa-miR-3157-3p  | hsa-miR-4677-5p | hsa-miR-6735-5p | hsa-miR-8064 |
| hsa-miR-3158-3p  | hsa-miR-4677-5p | hsa-miR-6736-5p | hsa-miR-8064 |
| hsa-miR-3158-5p  | hsa-miR-4677-5p | hsa-miR-6736-5p | hsa-miR-8065 |
| hsa-miR-3160-5p  | hsa-miR-4678    | hsa-miR-6736-5p | hsa-miR-8065 |
| hsa-miR-3165     | hsa-miR-4682    | hsa-miR-6736-5p | hsa-miR-8068 |
| hsa-miR-3165     | hsa-miR-4682    | hsa-miR-6736-5p | hsa-miR-8069 |
| hsa-miR-3165     | hsa-miR-4683    | hsa-miR-6736-5p | hsa-miR-8069 |
| hsa-miR-3166     | hsa-miR-4684-3p | hsa-miR-6736-5p | hsa-miR-8069 |
| hsa-miR-3167     | hsa-miR-4684-5p | hsa-miR-6736-5p | hsa-miR-8069 |
| hsa-miR-3168     | hsa-miR-4684-5p | hsa-miR-6737-3p | hsa-miR-8069 |
| hsa-miR-3169     | hsa-miR-4684-5p | hsa-miR-6737-5p | hsa-miR-8069 |
| hsa-miR-3169     | hsa-miR-4685-3p | hsa-miR-6737-5p | hsa-miR-8069 |
| hsa-miR-3169     | hsa-miR-4685-3p | hsa-miR-6737-5p | hsa-miR-8069 |
| hsa-miR-3170     | hsa-miR-4685-5p | hsa-miR-6737-5p | hsa-miR-8071 |
| hsa-miR-3170     | hsa-miR-4685-5p | hsa-miR-6737-5p | hsa-miR-8071 |
| hsa-miR-3170     | hsa-miR-4686    | hsa-miR-6737-5p | hsa-miR-8071 |
| hsa-miR-3171     | hsa-miR-4686    | hsa-miR-6737-5p | hsa-miR-8071 |
| hsa-miR-3173-5p  | hsa-miR-4687-3p | hsa-miR-6738-3p | hsa-miR-8071 |
| hsa-miR-3173-5p  | hsa-miR-4687-3p | hsa-miR-6738-5p | hsa-miR-8071 |
| hsa-miR-3173-5p  | hsa-miR-4687-3p | hsa-miR-6738-5p | hsa-miR-8072 |
| hsa-miR-3173-5p  | hsa-miR-4687-3p | hsa-miR-6738-5p | hsa-miR-8072 |
| hsa-miR-3174     | hsa-miR-4687-3p | hsa-miR-6738-5p | hsa-miR-8072 |
| hsa-miR-3175     | hsa-miR-4687-5p | hsa-miR-6740-3p | hsa-miR-8072 |
| hsa-miR-3176     | hsa-miR-4688    | hsa-miR-6740-3p | hsa-miR-8072 |
| hsa-miR-3176     | hsa-miR-4689    | hsa-miR-6740-5p | hsa-miR-8072 |
| hsa-miR-3177-3p  | hsa-miR-4689    | hsa-miR-6740-5p | hsa-miR-8072 |
| hsa-miR-3177-5p  | hsa-miR-4689    | hsa-miR-6740-5p | hsa-miR-8072 |
| hsa-miR-3177-5p  | hsa-miR-4689    | hsa-miR-6741-5p | hsa-miR-8072 |
| hsa-miR-3178     | hsa-miR-4689    | hsa-miR-6741-5p | hsa-miR-8072 |
| hsa-miR-3178     | hsa-miR-4690-5p | hsa-miR-6741-5p | hsa-miR-8072 |
| hsa-miR-3178     | hsa-miR-4690-5p | hsa-miR-6741-5p | hsa-miR-8073 |
| hsa-miR-3179     | hsa-miR-4691-5p | hsa-miR-6741-5p | hsa-miR-8073 |

|                 |                 |                 |                 |
|-----------------|-----------------|-----------------|-----------------|
| hsa-miR-3180-3p | hsa-miR-4691-5p | hsa-miR-6741-5p | hsa-miR-8073    |
| hsa-miR-3180-3p | hsa-miR-4691-5p | hsa-miR-6741-5p | hsa-miR-8074    |
| hsa-miR-3180-3p | hsa-miR-4691-5p | hsa-miR-6741-5p | hsa-miR-8075    |
| hsa-miR-3180-3p | hsa-miR-4691-5p | hsa-miR-6741-5p | hsa-miR-8077    |
| hsa-miR-3180-3p | hsa-miR-4692    | hsa-miR-6741-5p | hsa-miR-8077    |
| hsa-miR-3180-3p | hsa-miR-4692    | hsa-miR-6741-5p | hsa-miR-8077    |
| hsa-miR-3180-3p | hsa-miR-4692    | hsa-miR-6741-5p | hsa-miR-8078    |
| hsa-miR-3180-3p | hsa-miR-4695-5p | hsa-miR-6741-5p | hsa-miR-8078    |
| hsa-miR-3180-5p | hsa-miR-4697-3p | hsa-miR-6742-3p | hsa-miR-8078    |
| hsa-miR-3180    | hsa-miR-4697-3p | hsa-miR-6742-5p | hsa-miR-8078    |
| hsa-miR-3180    | hsa-miR-4697-5p | hsa-miR-6742-5p | hsa-miR-8080    |
| hsa-miR-3180    | hsa-miR-4697-5p | hsa-miR-6743-3p | hsa-miR-8081    |
| hsa-miR-3180    | hsa-miR-4697-5p | hsa-miR-6743-5p | hsa-miR-8083    |
| hsa-miR-3180    | hsa-miR-4697-5p | hsa-miR-6743-5p | hsa-miR-8083    |
| hsa-miR-3180    | hsa-miR-4697-5p | hsa-miR-6744-3p | hsa-miR-8085    |
| hsa-miR-3180    | hsa-miR-4697-5p | hsa-miR-6744-5p | hsa-miR-8086    |
| hsa-miR-3180    | hsa-miR-4700-5p | hsa-miR-6744-5p | hsa-miR-8086    |
| hsa-miR-3181    | hsa-miR-4700-5p | hsa-miR-6744-5p | hsa-miR-8086    |
| hsa-miR-3182    | hsa-miR-4700-5p | hsa-miR-6745    | hsa-miR-8089    |
| hsa-miR-3182    | hsa-miR-4700-5p | hsa-miR-6745    | hsa-miR-8089    |
| hsa-miR-3183    | hsa-miR-4701-3p | hsa-miR-6745    | hsa-miR-8089    |
| hsa-miR-3184-5p | hsa-miR-4701-3p | hsa-miR-6745    | hsa-miR-8089    |
| hsa-miR-3184-5p | hsa-miR-4701-3p | hsa-miR-6745    | hsa-miR-873-3p  |
| hsa-miR-3186-3p | hsa-miR-4701-3p | hsa-miR-6745    | hsa-miR-873-3p  |
| hsa-miR-3186-5p | hsa-miR-4701-3p | hsa-miR-6745    | hsa-miR-873-3p  |
| hsa-miR-3187-3p | hsa-miR-4701-5p | hsa-miR-6745    | hsa-miR-873-5p  |
| hsa-miR-3187-3p | hsa-miR-4703-3p | hsa-miR-6746-5p | hsa-miR-874-5p  |
| hsa-miR-3187-3p | hsa-miR-4705    | hsa-miR-6746-5p | hsa-miR-875-3p  |
| hsa-miR-3187-3p | hsa-miR-4706    | hsa-miR-6746-5p | hsa-miR-875-3p  |
| hsa-miR-3187-5p | hsa-miR-4706    | hsa-miR-6747-3p | hsa-miR-876-3p  |
| hsa-miR-3187-5p | hsa-miR-4706    | hsa-miR-6747-5p | hsa-miR-876-5p  |
| hsa-miR-3187-5p | hsa-miR-4706    | hsa-miR-6747-5p | hsa-miR-885-3p  |
| hsa-miR-3187-5p | hsa-miR-4706    | hsa-miR-6747-5p | hsa-miR-885-3p  |
| hsa-miR-3187-5p | hsa-miR-4707-5p | hsa-miR-6747-5p | hsa-miR-885-3p  |
| hsa-miR-3187-5p | hsa-miR-4707-5p | hsa-miR-6747-5p | hsa-miR-885-3p  |
| hsa-miR-3187-5p | hsa-miR-4708-5p | hsa-miR-6747-5p | hsa-miR-885-3p  |
| hsa-miR-3187-5p | hsa-miR-4710    | hsa-miR-6748-3p | hsa-miR-885-5p  |
| hsa-miR-3187-5p | hsa-miR-4710    | hsa-miR-6748-5p | hsa-miR-887-5p  |
| hsa-miR-3188    | hsa-miR-4710    | hsa-miR-6748-5p | hsa-miR-887-5p  |
| hsa-miR-3188    | hsa-miR-4711-3p | hsa-miR-6748-5p | hsa-miR-889-5p  |
| hsa-miR-3188    | hsa-miR-4711-3p | hsa-miR-6748-5p | hsa-miR-891a-3p |
| hsa-miR-3189-3p | hsa-miR-4711-5p | hsa-miR-6748-5p | hsa-miR-891a-3p |
| hsa-miR-3189-3p | hsa-miR-4712-5p | hsa-miR-6748-5p | hsa-miR-891a-3p |



|                 |                 |                 |                   |
|-----------------|-----------------|-----------------|-------------------|
| hsa-miR-3197    | hsa-miR-4728-5p | hsa-miR-6754-5p | hsa-miR-939-3p    |
| hsa-miR-3198    | hsa-miR-4730    | hsa-miR-6754-5p | hsa-miR-939-3p    |
| hsa-miR-3198    | hsa-miR-4730    | hsa-miR-6754-5p | hsa-miR-939-5p    |
| hsa-miR-3198    | hsa-miR-4731-5p | hsa-miR-6754-5p | hsa-miR-939-5p    |
| hsa-miR-3198    | hsa-miR-4731-5p | hsa-miR-6755-3p | hsa-miR-939-5p    |
| hsa-miR-3198    | hsa-miR-4731-5p | hsa-miR-6755-5p | hsa-miR-939-5p    |
| hsa-miR-3199    | hsa-miR-4731-5p | hsa-miR-6756-3p | hsa-miR-939-5p    |
| hsa-miR-3199    | hsa-miR-4732-3p | hsa-miR-6756-5p | hsa-miR-93-3p     |
| hsa-miR-31-3p   | hsa-miR-4732-5p | hsa-miR-6756-5p | hsa-miR-93-3p     |
| hsa-miR-31-5p   | hsa-miR-4732-5p | hsa-miR-6756-5p | hsa-miR-942-5p    |
| hsa-miR-3200-3p | hsa-miR-4734    | hsa-miR-6756-5p | hsa-miR-942-5p    |
| hsa-miR-3200-3p | hsa-miR-4734    | hsa-miR-6756-5p | hsa-miR-942-5p    |
| hsa-miR-3202    | hsa-miR-4734    | hsa-miR-6756-5p | hsa-miR-9500      |
| hsa-miR-320a    | hsa-miR-4734    | hsa-miR-6756-5p | hsa-miR-96-5p     |
| hsa-miR-320b    | hsa-miR-4736    | hsa-miR-6757-5p | hsa-miR-98-5p     |
| hsa-miR-323a-5p | hsa-miR-4736    | hsa-miR-6757-5p | hsa-miR-98-5p     |
| hsa-miR-323a-5p | hsa-miR-4736    | hsa-miR-6758-3p | hsa-miR-99b-3p    |
| hsa-miR-323a-5p | hsa-miR-4736    | hsa-miR-6758-5p | hsa-miR-9-5p      |
| hsa-miR-323a-5p | hsa-miR-4737    | hsa-miR-6759-5p | hsa-miR-9-5p      |
| hsa-miR-323a-5p | hsa-miR-4738-5p | hsa-miR-6759-5p | hsa-miR-9-5p      |
| hsa-miR-323a-5p | hsa-miR-4739    | hsa-miR-6759-5p | hsa-miR-708-5p    |
| hsa-miR-323a-5p | hsa-miR-4740-3p | hsa-miR-6759-5p | hsa-miR-708-3p    |
| hsa-miR-323a-5p | hsa-miR-4740-5p | hsa-miR-6759-5p | hsa-miR-455-5p    |
| hsa-miR-323b-5p | hsa-miR-4741    | hsa-miR-6759-5p | hsa-miR-409-3p    |
| hsa-miR-323b-5p | hsa-miR-4741    | hsa-miR-6759-5p | hsa-miR-297       |
| hsa-miR-323b-5p | hsa-miR-4741    | hsa-miR-6759-5p | hsa-miR-206       |
| hsa-miR-323b-5p | hsa-miR-4741    | hsa-miR-6759-5p | hsa-miR-145-3p    |
| hsa-miR-323b-5p | hsa-miR-4742-3p | hsa-miR-675-3p  | hsa-miR-143-5p    |
| hsa-miR-323b-5p | hsa-miR-4742-3p | hsa-miR-675-3p  | hsa-miR-138-5p    |
| hsa-miR-323b-5p | hsa-miR-4742-3p | hsa-miR-675-5p  | hsa-miR-143-3p    |
| hsa-miR-323b-5p | hsa-miR-4743-3p | hsa-miR-675-5p  | hsa-miR-199a-3p   |
| hsa-miR-323b-5p | hsa-miR-4743-3p | hsa-miR-675-5p  | hsa-miR-199b-3p   |
| hsa-miR-324-3p  | hsa-miR-4743-5p | hsa-miR-675-5p  | hsa-miR-146a-5p   |
| hsa-miR-324-3p  | hsa-miR-4743-5p | hsa-miR-675-5p  | hsa-miR-129-5p    |
| hsa-miR-324-5p  | hsa-miR-4743-5p | hsa-miR-675-5p  | hsa-miR-155-5p    |
| hsa-miR-325 E   | hsa-miR-4743-5p | hsa-miR-675-5p  | hsa-miR-129-2-3p  |
| hsa-miR-325 E   | hsa-miR-4743-5p | hsa-miR-675-5p  | hsa-miR-10b-3p    |
| hsa-miR-325 E   | hsa-miR-4745-3p | hsa-miR-675-5p  | hsa-miR-450a-1-3p |
| hsa-miR-328-5p  | hsa-miR-4745-3p | hsa-miR-6760-3p | hsa-let-7g-3p     |
| hsa-miR-328-5p  | hsa-miR-4745-3p | hsa-miR-6760-3p | hsa-miR-29a-5p    |
| hsa-miR-328-5p  | hsa-miR-4745-5p | hsa-miR-6760-5p |                   |
| hsa-miR-328-5p  | hsa-miR-4745-5p | hsa-miR-6761-3p | hsa-let-7c-3p     |
| hsa-miR-328-5p  | hsa-miR-4745-5p | hsa-miR-6761-3p | hsa-miR-33a-5p    |

|                |                 |                  |                   |
|----------------|-----------------|------------------|-------------------|
| hsa-miR-329-5p | hsa-miR-4746-3p | hsa-miR-6761-5p  | hsa-miR-4510      |
| hsa-miR-329-5p | hsa-miR-4746-3p | hsa-miR-6762-3p  | hsa-miR-9-5p      |
| hsa-miR-329-5p | hsa-miR-4746-3p | hsa-miR-6762-3p  | hsa-miR-877-3p    |
| hsa-miR-329-5p | hsa-miR-4746-3p | hsa-miR-6762-3p  | hsa-miR-653-3p    |
| hsa-miR-330-5p | hsa-miR-4746-5p | hsa-miR-6762-3p  |                   |
| hsa-miR-330-5p | hsa-miR-4746-5p | hsa-miR-6762-3p  | hsa-miR-31-3p     |
| hsa-miR-330-5p | hsa-miR-4747-3p | hsa-miR-6762-3p  | hsa-miR-15a-5p    |
| hsa-miR-330-5p | hsa-miR-4747-5p | hsa-miR-6762-5p  | hsa-miR-182-3p    |
| hsa-miR-331-5p | hsa-miR-4747-5p | hsa-miR-6762-5p  | hsa-miR-125a-3p   |
| hsa-miR-335-3p | hsa-miR-4747-5p | hsa-miR-6762-5p  | hsa-miR-195-5p    |
| hsa-miR-338-3p | hsa-miR-4748    | hsa-miR-6762-5p  | hsa-miR-107       |
| hsa-miR-339-3p | hsa-miR-4748    | hsa-miR-6763-3p  | hsa-miR-130a-3p   |
| hsa-miR-339-3p | hsa-miR-4748    | hsa-miR-6763-3p  | hsa-miR-514a-3p   |
| hsa-miR-339-3p | hsa-miR-4749-5p | hsa-miR-6763-3p  | hsa-miR-424-5p    |
| hsa-miR-339-5p | hsa-miR-4749-5p | hsa-miR-6763-5p  | hsa-miR-16-5p     |
| hsa-miR-339-5p | hsa-miR-4749-5p | hsa-miR-6764-3p  | hsa-miR-146b-5p   |
| hsa-miR-339-5p | hsa-miR-4749-5p | hsa-miR-6764-3p  | hsa-miR-940       |
| hsa-miR-339-5p | hsa-miR-4750-3p | hsa-miR-6764-3p  | hsa-miR-9-3p      |
| hsa-miR-33a-5p | hsa-miR-4750-5p | hsa-miR-6764-5p  | hsa-miR-627-3p    |
| hsa-miR-33a-5p | hsa-miR-4750-5p | hsa-miR-6764-5p  | hsa-miR-605-5p    |
| hsa-miR-33b-3p | hsa-miR-4750-5p | hsa-miR-6764-5p  |                   |
| hsa-miR-33b-3p | hsa-miR-4750-5p | hsa-miR-6765-3p  | hsa-miR-378e      |
| hsa-miR-33b-5p | hsa-miR-4751    | hsa-miR-6765-3p  | hsa-miR-24-2-5p   |
| hsa-miR-33b-5p | hsa-miR-4751    | hsa-miR-6765-5p  | hsa-miR-103a-3p   |
| hsa-miR-33b-5p | hsa-miR-4753-3p | hsa-miR-6766-3p  | hsa-miR-30d-3p    |
| hsa-miR-340-3p | hsa-miR-4753-3p | hsa-miR-6766-5p  | hsa-miR-550a-3p   |
| hsa-miR-342-5p | hsa-miR-4753-3p | hsa-miR-6766-5p  | hsa-miR-15b-5p    |
| hsa-miR-342-5p | hsa-miR-4753-3p | hsa-miR-6766-5p  | hsa-miR-548n      |
| hsa-miR-345-5p | hsa-miR-4753-5p | hsa-miR-6767-3p  | hsa-let-7a-2-3p   |
| hsa-miR-346 E  | hsa-miR-4754    | hsa-miR-6767-5p  | hsa-miR-615-5p    |
| hsa-miR-34a-5p | hsa-miR-4755-3p | hsa-miR-6768-3p  | hsa-miR-542-3p    |
| hsa-miR-34a-5p | hsa-miR-4755-3p | hsa-miR-6768-5p  | hsa-miR-196b-5p   |
| hsa-miR-34a-5p | hsa-miR-4755-5p | hsa-miR-6768-5p  | hsa-miR-301a-5p   |
| hsa-miR-34a-5p | hsa-miR-4755-5p | hsa-miR-6769a-5p | hsa-miR-24-1-5p   |
| hsa-miR-34a-5p | hsa-miR-4756-3p | hsa-miR-6769a-5p | hsa-miR-1260a     |
| hsa-miR-34a-5p | hsa-miR-4756-3p | hsa-miR-6769a-5p | hsa-miR-5100      |
| hsa-miR-34a-5p | hsa-miR-4756-5p | hsa-miR-6769a-5p | hsa-miR-503-5p    |
| hsa-miR-34b-5p | hsa-miR-4757-3p | hsa-miR-6769a-5p | hsa-miR-1260b     |
| hsa-miR-34c-5p | hsa-miR-4757-5p | hsa-miR-6769a-5p | hsa-miR-27a-5p    |
| hsa-miR-34c-5p | hsa-miR-4757-5p | hsa-miR-6769a-5p | hsa-miR-378g      |
| hsa-miR-34c-5p | hsa-miR-4757-5p | hsa-miR-6769a-5p | hsa-miR-6501-5p   |
| hsa-miR-34c-5p | hsa-miR-4758-3p | hsa-miR-6769b-3p | hsa-miR-346       |
| hsa-miR-34c-5p | hsa-miR-4758-5p | hsa-miR-6769b-5p | hsa-miR-125b-2-3p |

|                 |                 |                  |                 |
|-----------------|-----------------|------------------|-----------------|
| hsa-miR-3529-5p | hsa-miR-4758-5p | hsa-miR-6769b-5p | hsa-miR-196a-5p |
| hsa-miR-3605-3p | hsa-miR-4758-5p | hsa-miR-6769b-5p | hsa-miR-6720-5p |
| hsa-miR-3605-5p | hsa-miR-4758-5p | hsa-miR-6769b-5p | hsa-miR-548ab   |
| hsa-miR-3607-5p | hsa-miR-4761-3p | hsa-miR-6769b-5p | hsa-miR-141-3p  |
| hsa-miR-3610    | hsa-miR-4761-5p | hsa-miR-6769b-5p | hsa-miR-342-5p  |
| hsa-miR-3612    | hsa-miR-4763-3p | hsa-miR-6769b-5p | hsa-miR-1306-5p |
| hsa-miR-3614-3p | hsa-miR-4763-3p | hsa-miR-676-3p   | hsa-miR-183-3p  |
| hsa-miR-3614-5p | hsa-miR-4763-3p | hsa-miR-676-3p   | hsa-miR-324-3p  |
| hsa-miR-3614-5p | hsa-miR-4763-3p | hsa-miR-676-3p   | hsa-miR-378d    |
| hsa-miR-3614-5p | hsa-miR-4763-3p | hsa-miR-676-3p   |                 |
| hsa-miR-3615    | hsa-miR-4763-3p | hsa-miR-6770-3p  |                 |
| hsa-miR-3615    | hsa-miR-4763-3p | hsa-miR-6770-3p  |                 |
| hsa-miR-3615    | hsa-miR-4763-3p | hsa-miR-6770-3p  |                 |
| hsa-miR-3615    | hsa-miR-4763-5p | hsa-miR-6770-3p  |                 |
| hsa-miR-3616-3p | hsa-miR-4764-5p | hsa-miR-6770-5p  |                 |
| hsa-miR-3616-3p | hsa-miR-4764-5p | hsa-miR-6771-5p  |                 |
| hsa-miR-3616-3p | hsa-miR-4764-5p | hsa-miR-6771-5p  |                 |
| hsa-miR-3619-3p | hsa-miR-4764-5p | hsa-miR-6771-5p  |                 |
| hsa-miR-3619-3p | hsa-miR-4765    | hsa-miR-6771-5p  |                 |
| hsa-miR-3619-5p | hsa-miR-4767    | hsa-miR-6771-5p  |                 |
| hsa-miR-3619-5p | hsa-miR-4767    | hsa-miR-6771-5p  |                 |
| hsa-miR-361-3p  | hsa-miR-4767    | hsa-miR-6772-3p  |                 |
| hsa-miR-3620-3p | hsa-miR-4767    | hsa-miR-6772-3p  |                 |

d. HMUCC cohort

|                 |                 |                  |                  |   |         |
|-----------------|-----------------|------------------|------------------|---|---------|
| hsa-miR-708-5p  | 1. 3703442      | 5. 18400141<br>8 | 4. 31683286<br>9 | 0 | #DIV/0! |
| hsa-miR-708-3p  | 5. 9381581<br>9 | 10. 1323664<br>1 | 2. 15841643<br>5 | 0 | #DIV/0! |
| hsa-miR-516b-5p | 1. 3703442      | 0. 47127285<br>6 | 0                | 0 | #DIV/0! |
| hsa-miR-455-5p  | 81. 763870<br>5 | 208. 066966      | 35. 8836732<br>3 | 0 | #DIV/0! |
| hsa-miR-455-3p  | 6. 3949395<br>9 | 13. 1956399<br>7 | 2. 96782259<br>8 | 0 | #DIV/0! |
| hsa-miR-409-3p  | 1. 3703442      | 0. 70690928<br>4 | 1. 88861438      | 0 | #DIV/0! |
| hsa-miR-34c-5p  | 218. 79829      | 312. 689540<br>1 | 87. 4158656      | 0 | #DIV/0! |
| hsa-miR-34c-3p  | 3. 6542512      | 2. 82763713<br>7 | 0. 53960410<br>9 | 0 | #DIV/0! |
| hsa-miR-34b-3p  | 9. 5924093      | 22. 3854606      | 4. 04703081      | 0 | #DIV/0! |

|                  |                |                 |                 |                 |              |
|------------------|----------------|-----------------|-----------------|-----------------|--------------|
|                  | 9              | 7               | 5               |                 |              |
| hsa-miR-297      | 4.5678139<br>9 | 3.29890999<br>3 | 0.26980205<br>4 | 0               | #DIV/0!      |
| hsa-miR-214-5p   | 38.369637<br>6 | 82.9440226<br>8 | 11.8712903<br>9 | 0               | #DIV/0!      |
| hsa-miR-214-3p   | 100.94868<br>9 | 164.709863<br>2 | 28.5990177<br>6 | 0               | #DIV/0!      |
| hsa-miR-206      | 97.751219<br>5 | 177.905503<br>2 | 30.4876321<br>4 | 0               | #DIV/0!      |
| hsa-miR-145-5p   | 44.307795<br>8 | 98.4960269<br>3 | 19.1559458<br>6 | 0               | #DIV/0!      |
| hsa-miR-145-3p   | 112.82500<br>6 | 218.906241<br>7 | 32.3762465<br>2 | 0               | #DIV/0!      |
| hsa-miR-143-5p   | 38.826419      | 69.7483827<br>1 | 14.0297068<br>2 | 0               | #DIV/0!      |
| hsa-miR-138-5p   | 7.3085023<br>9 | 14.8450949<br>7 | 3.23762465<br>2 | 0               | #DIV/0!      |
| hsa-miR-143-3p   | 5959.6269<br>2 | 13032.3439<br>3 | 2245.8323       | 4.88640930<br>8 | 1219.63<br>3 |
| hsa-miR-199a-3p  | 4323.8927<br>3 | 8202.73969<br>8 | 2279.28775<br>5 | 8.14401551<br>3 | 530.928<br>8 |
| hsa-miR-199b-3p  | 2159.6624<br>6 | 4097.24621<br>1 | 1138.56466<br>9 | 4.07200775<br>6 | 530.368      |
| hsa-miR-199a-5p  | 1663.5978<br>6 | 3654.48536<br>3 | 601.658581<br>1 | 4.88640930<br>8 | 340.454<br>1 |
| hsa-miR-146a-5p  | 687.91278<br>8 | 1088.40466<br>1 | 423.589225<br>3 | 3.25760620<br>5 | 211.171<br>3 |
| hsa-miR-16-1-3p  | 74.912149<br>5 | 112.634212<br>6 | 16.7277273<br>7 | 2.44320465<br>4 | 30.6614<br>3 |
| hsa-miR-199b-5p  | 10.505972<br>2 | 25.2130978      | 6.74505135<br>8 | 0.40720077<br>6 | 25.8004<br>7 |
| hsa-miR-129-5p   | 909.90854<br>8 | 1290.58071<br>7 | 286.799583<br>7 | 47.2352899<br>7 | 19.2633<br>2 |
| hsa-miR-155-5p   | 52.986642<br>3 | 77.2887484<br>1 | 24.821789       | 2.85040542<br>9 | 18.5891<br>6 |
| hsa-miR-129-2-3p | 15.073786<br>2 | 25.6843706<br>6 | 4.04703081<br>5 | 0.81440155<br>1 | 18.5090<br>3 |
| hsa-miR-181a-3p  | 4.1110326      | 10.1323664<br>1 | 1.88861438      | 0.40720077<br>6 | 10.0958<br>4 |
| hsa-miR-6877-5p  | 3.6542512      | 3.77018284<br>9 | 2.96782259<br>8 | 0.40720077<br>6 | 8.97407<br>7 |
| hsa-miR-10b-3p   | 66.233302<br>9 | 98.0247540<br>8 | 29.9480280<br>3 | 7.73681473<br>7 | 8.56079<br>7 |
| hsa-miR-450a-1-3 | 6.8517209      | 15.5520042      | 3.50742670      | 0.81440155      | 8.41319      |

| p                | 9              | 5               | 6               | 1               | 7            |
|------------------|----------------|-----------------|-----------------|-----------------|--------------|
| hsa-let-7g-3p    | 3.1974698      | 3.77018284<br>9 | 1.07920821<br>7 | 0.40720077<br>6 | 7.85231<br>8 |
| hsa-miR-26a-2-3p | 12.333097<br>8 | 21.2072785<br>3 | 13.2203006<br>6 | 1.62880310<br>3 | 7.57187<br>8 |
| hsa-miR-29a-5p   | 5.9381581<br>9 | 7.06909284<br>2 | 4.31683286<br>9 | 0.81440155<br>1 | 7.29143<br>8 |
| hsa-miR-6842-3p  | 2.7406884      | 1.17818214      | 1.88861438      | 0.40720077<br>6 | 6.73055<br>8 |
| hsa-miR-6087     | 7.7652837<br>9 | 4.24145570<br>5 | 5.66584314<br>1 | 1.22160232<br>7 | 6.35663<br>8 |
| hsa-miR-10b-5p   | 3642.8316<br>6 | 5943.22198<br>9 | 2278.74815<br>1 | 748.842226<br>4 | 4.86461<br>8 |
| hsa-miR-345-3p   | 9.5924093<br>9 | 12.7243671<br>2 | 7.82425957<br>5 | 2.03600387<br>8 | 4.71139<br>1 |
| hsa-let-7c-3p    | 13.246660<br>6 | 12.0174578<br>3 | 9.98267601      | 2.85040542<br>9 | 4.64729      |
| hsa-miR-6500-3p  | 1.8271256      | 0.70690928<br>4 | 1.07920821<br>7 | 0.40720077<br>6 | 4.48703<br>9 |
| hsa-miR-3648     | 3.6542512      | 1.41381856<br>8 | 2.15841643<br>5 | 0.81440155<br>1 | 4.48703<br>9 |
| hsa-let-7c-5p    | 3648.7698<br>2 | 6395.17265<br>8 | 2811.87701      | 842.498404<br>8 | 4.33089<br>2 |
| hsa-miR-33a-5p   | 10.962753<br>6 | 14.6094585<br>4 | 8.36386368<br>4 | 2.85040542<br>9 | 3.84603<br>3 |
| hsa-miR-4510     | 12.333097<br>8 | 23.5636428<br>1 | 7.55445752<br>1 | 3.25760620<br>5 | 3.78593<br>9 |
| hsa-miR-9-5p     | 41.110326      | 67.156382       | 33.1856526<br>8 | 10.9944209<br>4 | 3.73919<br>9 |
| hsa-miR-222-5p   | 16.444130<br>4 | 14.8450949<br>7 | 7.01485341<br>2 | 4.47920853<br>2 | 3.67121<br>3 |
| hsa-miR-877-3p   | 12.789879<br>2 | 11.7818214      | 5.39604108<br>7 | 3.66480698<br>1 | 3.48991<br>9 |
| hsa-miR-653-3p   | 1.3703442      | 1.88509142<br>5 | 2.42821848<br>9 | 0.40720077<br>6 | 3.36527<br>9 |
| hsa-miR-3607-3p  | 1.3703442      | 2.59200070<br>9 | 3.77722876<br>1 | 0.40720077<br>6 | 3.36527<br>9 |
| hsa-miR-31-3p    | 13.703442      | 9.66109355<br>1 | 8.36386368<br>4 | 4.07200775<br>6 | 3.36527<br>9 |
| hsa-miR-184      | 2.7406884      | 0.23563642<br>8 | 0.53960410<br>9 | 0.81440155<br>1 | 3.36527<br>9 |
| hsa-miR-328-3p   | 152.10820<br>6 | 262.970253<br>7 | 122.490132<br>7 | 45.6064868<br>7 | 3.33523<br>2 |
| hsa-miR-15a-5p   | 7.7652837      | 12.7243671      | 10.2524780      | 2.44320465      | 3.17831      |

|                 |                |                 |                 |                 |              |
|-----------------|----------------|-----------------|-----------------|-----------------|--------------|
|                 | 9              | 2               | 6               | 4               | 9            |
| hsa-miR-182-3p  | 12.789879<br>2 | 26.1556435<br>2 | 9.71287395<br>6 | 4.07200775<br>6 | 3.14092<br>7 |
| hsa-miR-125a-3p | 123.78775<br>9 | 152.456769<br>7 | 76.3539813<br>7 | 40.3128767<br>9 | 3.07067<br>5 |
| hsa-miR-195-5p  | 5.9381581<br>9 | 17.2014592<br>5 | 12.4108945<br>8 | 2.03600387<br>8 | 2.91657<br>5 |
| hsa-miR-107     | 147.54039<br>2 | 227.624789<br>5 | 141.646078<br>5 | 51.3072977<br>3 | 2.87562<br>2 |
| hsa-miR-130a-3p | 95.924093<br>9 | 155.520042<br>5 | 65.0222950<br>9 | 33.7976643<br>8 | 2.83818<br>7 |
| hsa-miR-514a-3p | 6.8517209<br>9 | 4.94836499<br>4 | 4.04703081<br>5 | 2.44320465<br>4 | 2.80439<br>9 |
| hsa-miR-4449    | 2.283907<br>4  | 0.70690928<br>4 | 1.34901027<br>2 | 0.81440155<br>1 | 2.80439<br>9 |
| hsa-miR-424-5p  | 38.826419<br>9 | 67.156382<br>9  | 39.3910999<br>3 | 13.8448263<br>7 | 2.80439<br>9 |
| hsa-miR-99b-5p  | 11632.395<br>1 | 16559.5856<br>2 | 7913.56405<br>5 | 4150.59750<br>6 | 2.80258<br>3 |
| hsa-let-7e-3p   | 27.863665<br>4 | 47.8341949<br>4 | 22.9331746<br>2 | 10.5872201<br>7 | 2.63182<br>1 |
| hsa-miR-653-5p  | 3.1974698<br>9 | 2.35636428<br>1 | 3.77722876<br>1 | 1.22160232<br>7 | 2.61743<br>9 |
| hsa-miR-212-3p  | 12.789879<br>2 | 17.6727321<br>1 | 15.1089150<br>4 | 4.88640930<br>8 | 2.61743<br>9 |
| hsa-miR-16-5p   | 598.84041<br>5 | 921.102797<br>3 | 707.690788<br>5 | 230.882839<br>8 | 2.59369<br>8 |
| hsa-miR-522-3p  | 11.419535<br>7 | 16.4945499<br>7 | 7.01485341<br>2 | 4.47920853<br>2 | 2.54945<br>4 |
| hsa-miR-146b-5p | 143.42935<br>9 | 218.199332<br>4 | 138.948058<br>5 | 61.0801163<br>5 | 2.34821<br>7 |
| hsa-miR-99b-3p  | 852.35409<br>1 | 1124.69267<br>1 | 430.873880<br>8 | 365.259095<br>7 | 2.33356<br>9 |
| hsa-miR-6510-3p | 0.9135628<br>2 | 0.94254571<br>2 | 0.26980205<br>4 | 0.40720077<br>6 | 2.24351<br>9 |
| hsa-miR-4440    | 0.9135628<br>8 | 1.41381856<br>8 | 3.50742670<br>6 | 0.40720077<br>6 | 2.24351<br>9 |
| hsa-miR-3180-3p | 9.1356279<br>9 | 12.9600035<br>4 | 9.44307190<br>1 | 4.07200775<br>6 | 2.24351<br>9 |
| hsa-miR-3180    | 9.1356279<br>9 | 12.9600035<br>4 | 9.44307190<br>1 | 4.07200775<br>6 | 2.24351<br>9 |
| hsa-miR-2682-5p | 0.9135628<br>6 | 0.47127285<br>6 | 0<br>0          | 0.40720077<br>6 | 2.24351<br>9 |
| hsa-miR-940     | 2.7406884<br>9 | 1.88509142<br>9 | 1.61881232<br>9 | 1.22160232<br>9 | 2.24351<br>9 |

|                   |                |                 |                 |                 |              |
|-------------------|----------------|-----------------|-----------------|-----------------|--------------|
|                   |                | 5               | 6               | 7               | 9            |
| hsa-miR-9-3p      | 2.7406884      | 5.65527427<br>4 | 4.85643697<br>8 | 1.22160232<br>7 | 2.24351<br>9 |
| hsa-miR-627-3p    | 1.8271256      | 1.88509142<br>5 | 4.31683286<br>9 | 0.81440155<br>1 | 2.24351<br>9 |
| hsa-miR-605-5p    | 1.8271256      | 1.41381856<br>8 | 1.61881232<br>6 | 0.81440155<br>1 | 2.24351<br>9 |
| hsa-miR-5009-5p   | 1.8271256      | 1.41381856<br>8 | 2.69802054<br>3 | 0.81440155<br>1 | 2.24351<br>9 |
| hsa-miR-378e      | 14.617004<br>8 | 20.2647328<br>1 | 18.8861438      | 6.51521241      | 2.24351<br>9 |
| hsa-miR-149-5p    | 348.52420<br>8 | 444.174666<br>9 | 272.769876<br>9 | 156.365097<br>8 | 2.22891<br>3 |
| hsa-miR-24-2-5p   | 668.27118<br>7 | 836.273683<br>2 | 450.299628<br>7 | 302.957377<br>1 | 2.20582<br>6 |
| hsa-miR-147b      | 22.382288<br>6 | 27.0981892<br>3 | 14.2995088<br>8 | 10.1800193<br>9 | 2.19864<br>9 |
| hsa-miR-103a-3p   | 1807.484       | 2842.24659<br>5 | 2032.41887<br>5 | 823.767169<br>1 | 2.19416<br>9 |
| hsa-miR-30d-3p    | 41.567107<br>4 | 58.2021977<br>3 | 39.1212978<br>8 | 19.1384364<br>5 | 2.17191<br>8 |
| hsa-miR-125b-1-3p | 372.27684<br>1 | 486.589224      | 322.143652<br>9 | 171.431526<br>5 | 2.17157<br>7 |
| hsa-miR-212-5p    | 52.986642<br>3 | 57.0240155<br>9 | 48.5643697<br>8 | 24.4320465<br>4 | 2.16873<br>5 |
| hsa-miR-550a-3p   | 23.295851<br>4 | 25.4487342<br>3 | 25.0915910<br>5 | 10.9944209<br>4 | 2.11887<br>9 |
| hsa-miR-15b-5p    | 101.86225<br>2 | 139.496765<br>4 | 117.903497<br>7 | 48.8640930<br>8 | 2.08460<br>3 |
| hsa-miR-31-5p     | 303.75963<br>1 | 441.582666<br>2 | 298.940676<br>2 | 145.777877<br>7 | 2.08371<br>6 |
| hsa-miR-548n      | 5.0245953<br>9 | 5.18400141<br>8 | 5.66584314<br>1 | 2.44320465<br>4 | 2.05655<br>9 |
| hsa-miR-125b-5p   | 6616.9353<br>5 | 10814.7695      | 8257.83147<br>7 | 3263.30701<br>6 | 2.02767<br>8 |
| hsa-miR-99a-5p    | 11258.291<br>2 | 18718.9578<br>5 | 13602.0705<br>7 | 5571.72821<br>3 | 2.02061      |
| hsa-miR-3909      | 14.617004<br>8 | 19.7934599<br>6 | 19.6955499<br>7 | 7.32961396<br>1 | 1.99423<br>9 |
| hsa-miR-34a-5p    | 36.085730<br>6 | 66.4494727<br>2 | 71.7673464<br>5 | 18.3240349      | 1.96931<br>1 |
| hsa-let-7a-2-3p   | 9.5924093<br>9 | 7.54036569<br>8 | 8.63366573<br>8 | 4.88640930<br>8 | 1.96307<br>9 |
| hsa-miR-615-5p    | 22.83907       | 51.8400141      | 29.6782259      | 11.8088224      | 1.93406      |

|                   |                |                 |                 |                 |              |
|-------------------|----------------|-----------------|-----------------|-----------------|--------------|
|                   |                | 8               | 8               | 9               | 8            |
| hsa-miR-542-3p    | 103.23259<br>6 | 169.186955<br>4 | 103.603988<br>9 | 53.7505023<br>8 | 1.92058<br>8 |
| hsa-miR-196b-5p   | 223.36610<br>4 | 396.811744<br>9 | 299.210478<br>2 | 116.459421<br>8 | 1.91797<br>4 |
| hsa-miR-652-3p    | 110.99788      | 167.537500<br>4 | 106.302009<br>4 | 58.2297109<br>2 | 1.90620<br>7 |
| hsa-let-7e-5p     | 1233.3097<br>8 | 1949.18453<br>3 | 1324.72808<br>7 | 649.892437<br>9 | 1.89771<br>4 |
| hsa-miR-132-5p    | 153.02176<br>9 | 183.089504<br>6 | 160.532222<br>3 | 81.0329543<br>5 | 1.88838<br>9 |
| hsa-miR-3614-5p   | 2.283907       | 0.47127285<br>6 | 1.61881232<br>6 | 1.22160232<br>7 | 1.86959<br>9 |
| hsa-miR-301a-5p   | 15.987349      | 25.6843706<br>6 | 9.44307190<br>1 | 8.55121628<br>8 | 1.86959<br>9 |
| hsa-miR-24-1-5p   | 34.258605      | 58.9091070<br>2 | 32.1064444<br>6 | 18.3240349      | 1.86959<br>9 |
| hsa-miR-1260a     | 282.29090<br>5 | 342.615366<br>4 | 503.180831<br>3 | 151.071487<br>8 | 1.86859<br>2 |
| hsa-miR-5100      | 42.937451<br>6 | 40.5294656<br>3 | 55.8490252<br>5 | 23.2104442<br>1 | 1.84991<br>9 |
| hsa-miR-503-5p    | 105.51650<br>3 | 170.129501<br>1 | 111.698050<br>5 | 57.4153093<br>6 | 1.83777<br>6 |
| hsa-miR-1306-3p   | 16.444130<br>4 | 15.5520042<br>5 | 11.6014883<br>4 | 8.95841706<br>4 | 1.83560<br>7 |
| hsa-miR-1260b     | 303.75963<br>1 | 380.552831<br>3 | 549.047180<br>6 | 168.988321<br>9 | 1.79751<br>8 |
| hsa-miR-101-3p    | 3616.7951<br>2 | 4840.91477<br>8 | 4152.25361<br>6 | 2025.00945<br>7 | 1.78606<br>3 |
| hsa-miR-27a-5p    | 954.67312<br>5 | 951.499896<br>6 | 1312.04739      | 534.654618<br>4 | 1.78558<br>8 |
| hsa-miR-378g      | 24.666195<br>6 | 34.6385549<br>3 | 28.5990177<br>6 | 13.8448263<br>7 | 1.78161<br>8 |
| hsa-miR-6501-5p   | 5.0245953<br>9 | 1.41381856<br>8 | 0.80940616<br>3 | 2.85040542<br>9 | 1.76276<br>5 |
| hsa-miR-346       | 6.3949395<br>9 | 9.42545712<br>3 | 4.04703081<br>5 | 3.66480698<br>1 | 1.74495<br>9 |
| hsa-miR-125b-2-3p | 79.936744<br>9 | 136.669128<br>3 | 120.331716<br>2 | 46.0136876<br>5 | 1.73723<br>8 |
| hsa-miR-196a-5p   | 1487.7370<br>2 | 2615.09307<br>9 | 2476.78285<br>9 | 861.636841<br>2 | 1.72664      |
| hsa-miR-30b-3p    | 13.246660<br>6 | 15.0807314      | 31.2970383      | 7.73681473<br>7 | 1.71215<br>9 |
| hsa-miR-1246      | 15.987349      | 16.4945499      | 11.0618842      | 9.36561784      | 1.70702      |

|                 |                |                 |                 |                 |              |
|-----------------|----------------|-----------------|-----------------|-----------------|--------------|
|                 |                | 7               | 3               |                 | 6            |
| hsa-miR-203a-3p | 118.30638<br>2 | 234.929518<br>8 | 142.995088<br>8 | 70.0385334<br>1 | 1.68916<br>1 |
| hsa-miR-6720-5p | 1.3703442      | 3.06327356<br>5 | 5.12623903<br>2 | 0.81440155<br>1 | 1.68263<br>9 |
| hsa-miR-548ab   | 2.7406884      | 1.64945499<br>7 | 2.42821848<br>9 | 1.62880310<br>3 | 1.68263<br>9 |
| hsa-miR-449c-5p | 1.3703442      | 2.35636428<br>1 | 3.23762465<br>2 | 0.81440155<br>1 | 1.68263<br>9 |
| hsa-miR-141-3p  | 2.7406884      | 1.64945499<br>7 | 1.34901027<br>2 | 1.62880310<br>3 | 1.68263<br>9 |
| hsa-miR-135b-5p | 1.3703442      | 3.06327356<br>5 | 1.07920821<br>7 | 0.81440155<br>1 | 1.68263<br>9 |
| hsa-miR-140-3p  | 1093.0778<br>9 | 1745.59465<br>9 | 1334.71076<br>3 | 651.114040<br>2 | 1.67878<br>1 |
| hsa-miR-22-5p   | 94.096968<br>3 | 134.784036<br>9 | 130.853996<br>3 | 56.6009078<br>1 | 1.66246<br>4 |
| hsa-miR-6720-3p | 15.530567<br>6 | 22.6210970<br>9 | 17.8069355<br>9 | 9.36561784      | 1.65825<br>3 |
| hsa-miR-132-3p  | 159.41670<br>8 | 213.486603<br>8 | 190.480250<br>4 | 96.9137846      | 1.64493<br>3 |
| hsa-miR-342-5p  | 11.876316<br>4 | 9.42545712<br>3 | 11.3316862<br>8 | 7.32961396<br>1 | 1.62031<br>9 |
| hsa-miR-1306-5p | 10.505972<br>2 | 12.9600035<br>4 | 13.2203006<br>6 | 6.51521241      | 1.61252<br>9 |
| hsa-miR-125a-5p | 3225.3334<br>6 | 5544.76078<br>9 | 3704.11240<br>4 | 2003.83501<br>7 | 1.60958      |
| hsa-miR-183-3p  | 6.3949395<br>9 | 15.5520042<br>5 | 7.55445752<br>1 | 4.07200775<br>6 | 1.57046<br>4 |
| hsa-miR-324-3p  | 32.431479<br>4 | 45.0065577<br>6 | 33.9950588<br>5 | 20.7672395<br>6 | 1.56166<br>5 |
| hsa-miR-625-3p  | 22.83907       | 22.8567335<br>2 | 29.9480280<br>3 | 14.6592279<br>2 | 1.558        |
| hsa-miR-615-3p  | 1553.0567<br>6 | 2386.29010<br>7 | 1551.36181<br>2 | 1008.22912      | 1.54038<br>1 |
| hsa-miR-378d    | 849.15662<br>2 | 1195.3836       | 964.272542<br>2 | 555.014657<br>2 | 1.52997<br>2 |
| hsa-miR-26b-5p  | 771.04700<br>2 | 1239.44761<br>2 | 955.638876<br>4 | 511.851375      | 1.50638<br>8 |

e. Overlapped miR

|                 |                |                 |                 |
|-----------------|----------------|-----------------|-----------------|
| hsa-miR-103a-3p | hsa-miR-324-3p | hsa-miR-143-3p  | hsa-miR-15b-5p  |
| hsa-miR-129-5p  | hsa-miR-33a-5p | hsa-miR-146a-5p | hsa-miR-542-3p  |
| hsa-miR-155-5p  | hsa-miR-409-3p | hsa-miR-107     | hsa-miR-503-5p  |
| hsa-miR-15a-5p  | hsa-miR-455-5p | hsa-miR-424-5p  | hsa-miR-141-3p  |
| hsa-miR-16-5p   | hsa-miR-206    | hsa-miR-146b-5p | hsa-miR-199a-5p |
| hsa-miR-195-5p  | hsa-miR-138-5p | hsa-miR-9-3p    |                 |
