# Supplementary material for: LncRNA TINCR favors tumorigenesis via STAT3–TINCR–EGFR-feedback loop by recruiting DNMT1 and acting as a competing endogenous RNA in human breast cancer
Source: Springer Nature journal article supplement (doi:10.1038/s41419-020-03188-0), 2021-01-14
Supplement: MOESM13 [file 41419_2020_3188_MOESM13_ESM.pdf]

| Target       | Position | Chr | GenomePosition | Distance2TSS | Type | UACC812         |                    |                    | MDA-MB-231      |                 |                 |
|--------------|----------|-----|----------------|--------------|------|-----------------|--------------------|--------------------|-----------------|-----------------|-----------------|
|              |          |     |                |              |      | 812-NC          | 812-Si<br>TINCR #1 | 812-Si<br>TINCR #2 | NC              | Si TINCR<br>#1  | Si TINCR<br>#2  |
| MIR503<br>_1 | 92       | X   | 133680280      | 148          | CG   | 0.9814126<br>39 | 0.975693362        | 0.98074662         | 0.9834464<br>49 | 0.9816168<br>79 | 0.9803789<br>81 |
| MIR503<br>_1 | 203      | X   | 133680391      | 37           | CG   | 0.9816188<br>87 | 0.978372491        | 0.977246036        | 0.9839563<br>35 | 0.9816513<br>76 | 0.9818718<br>95 |
