# Supplementary material for: LncRNA TINCR favors tumorigenesis via STAT3–TINCR–EGFR-feedback loop by recruiting DNMT1 and acting as a competing endogenous RNA in human breast cancer
Source: Cell Death Dis. 2021 Jan 14;12(1):83. doi: 10.1038/s41419-020-03188-0 (PMC7809450; doi:10.1038/s41419-020-03188-0)
Supplement: Supplementary file 8 — Supplementary Table S1 [file 41419_2020_3188_MOESM8_ESM.xlsx]

## Sheet: clinical information
Specimen Number	Specimen library Number	Medical Record Number	Pathology Number	Molecular Subtype	Age_at_diagnosis	Gender	Histological Grade	T(cm)ajcc_tumor_pathologic_pt	N ajcc_nodes_pathologic_pn	M ajcc_metastasis_pathologic_pm	TNM	er_status_by_ihc	pr_status_by_ihc	her2_status_by_ihc	KI-67（%）	P53
CA 1300497	HMU31300497J07RC1	532441	1318160	TNB	47	female	2	1.5*2.0	1.0*2.0	-	T2N1MO	-	-	-	25	-
CA 1200204	HMU31200204J07RC1	505844	1224420	HER-2	54	female	3	1.3*1.7	0.5*0.9	-	T1N1M0	-	-	3+	20	1+
CA 1300347	HMU31300347J07RC1	526979	1312896	TNB	51	female	3	2.9*2.1	1.2*0.7	-	T2N1MO	-	-	-	40	3+
CA 1100073	HMU31100073J07RC1	462048	1111264	TNB	56	female	2	1.3*1.5	0.6*1.1	-	T1N1M0	-	-	-	40	1+
CA 1300518	HMU31300518J07RC1	533053	1319425	HER-2	48	female	3	3.4*2.6	1.0*0.6	-	T2N1M0	-	-	3+	20	1+
CA 1300789	HMU31300789J07RC1	544410	1331476	HER-2	50	female	3	2.3*1.0	-	-	T2N0M0	-	-	3+	60	-
CA 1400434	HMU31400434J07RC1	571247	1422760	HER-2	59	female	2	2.2*1.5	2.0*1.3	-	T2N1M0	-	-	3+	60	2+
CA 1000016	HMU31000016J07RC3	427283	1006332	HER2	42	female	2	3.0*1.6	-	-	T2N0M0	-	-	3+	30	-
CA 1100086	HMU31100086J07RC1	463414	1113530	LB2	50	female	2	1.8*1.4	1.4*1.0	-	T1N1M0	+	+	3+	10	-
CA 1001434	HMU31001434J07RC3	451197	1101010	TNB	49	female	2	1.7*2.4	1.5*1.9	-	T2N1M0	-	-	-	20	-
CA 1300556	HMU31300556J07RC1	534655	1321034	HER-2	62	female	3	4.1*1.9	1.9*1.0	-	T2N1M0	-	-	3+	50	-
CA 1001341	HMU31100134J07RC1	463819	1112842	LA	43	female	3	2.5*1.6	1.7*1.3	-	T2N1MO	+	+	-	10	-
CA 1300516	HMU31300516J07RC1	531540	1319366	TNB	72	female	3	2.5*3.3	1.0*1.4	-	T2N1MO	-	-	1+	20	-
CA 1400212	HMU31400212J07RC1	556796	1411157	LB1	50	female	2	1.7*1.5	1.3*0.7	-	T1N1M0	+	-	1+	50	2+
CA 1100240	HMU31100240J07RC1	463556	1114897	LA	53	female	2	2.7*1.7	1.9*1.0	-	T2N1MO	+	+	-	<1	-
CA 1400045	HMU31400045J07RC1	552861	1402764	TNB	37	female	3	1.2*1.8	0.9*1.8	-	T1N1M0	-	-	-	60	3+
CA 130139	HMU3130139J07RC1	518871	1304866	HER-2	51	female	3	1.6*2.7	1.6*1.2	-	T2N1M0	-	-	3+	15	-
CA 1300832	HMU31300832J07RC1	547964	1334997	TNB	48	female	3	3.1*4.0	-	-	T2N0M0	-	-	1+	60	3+
CA 130238	HMU3130238J07RC1	521012	1307937	LB1	37	female	3	0.7*1.0	-	-	T1N0M0	+	+	2+	20	-
CA 130276	HMU3130276J07RP1	522396	1309684	LB1	57	female	2	3.0*3.1	2.3*2.2	-	T2N1MO	+	+	1+	15	-
CA 130095	HMU3130095J07RC1	518691	1303557	TNB	53	female	1	2.0*3.3	0.9*1.0	-	T2N1MO	-	-	-	50	2+
CA 130076	HMU3130076J07RC1	516949	1302707	TNB	51	female	2	6.0*1.3	1.0*0.7	-	T3N1M0	-	-	2+	20	-
CA 1400004	HMU31400004J07RC1	530176	1400170	LA	55	female	2	1.0*1.3	1.1*0.5	-	T1N1M0	+	+	-	10	-
CA 130157	HMU3130157J07RC1	519756	1305400	HER-2	58	female	1	2.8*1.2	-	-	T2N0M0	-	-	3+	30	-
CA 1100045	HMU31100045J07RC1	462221	1111801	TNB	49	female	2	2.5*2.6	0.5*0.5	-	T2N1MO	-	-	-	40	2+
CA 1300772	HMU31300772J07RC1	532567	1330536	TNB	44	female	2	2.2*1.6	1.3*0.8	-	T2N1MO	-	-	-	70	+
CA 1200169	HMU31200169J07RC1	503675	1223387	LA	46	female	2	2.0*1.4	1.2*0.7	-	T2N1M0	+	+	1+	5	-
CA 1400249	HMU31400249J07RC1	562325	1413183	LB2	47	female	2	1.8*1.4	1.0*0.5	-	T1N1M0	+	+	3+	25	+
CA 1002204	HMU31002204J07RC3	456695	1106031	TNB	47	female	2	2.6*2.4	1.0*0.6	-	T2N1M0	-	-	-	40	-
CA 1300760	HMU31300760J07RC1	544581	1329961	HER-2	33	female	2	1.2*0.8	1.7*0.6	-	T1N1M0	-	-	3+	15	2+
CA 1100065	HMU31100065J07RC1	460969	1110882	LB2	56	female	3	1.7*2.4	1.2*2.0	-	T2N1M0	+	+	3+	10	-
CA 1200150	HMU31200150J07RC1	504103	1222763	HER-2	54	female	2	3.9*2.2*3.5	1.3*0.7	-	T2N1M0	-	-	3+	40	2+
CA 1400253	HMU31400253J07RC1	562192	1413331	TNB	54	female	2	3.0*1.3	1.5*0.4	-	T2N1MO	-	-	1+	60	+
CA 1300567	HMU31300567J07RC1	534022	1321483	LB2	40	female	2	2.4*1.7	1.0*0.6	-	T2N1M0	+	-	3+	60	-
CA 1000019	HMU31000019J07RC3	427322	100635	HER2	53	female	2	3.1*1.2	1.2*1.3，右锁上0.5*0.3	-	T2N3MO	-	-	3+	20	-
CA 130181	HMU3130181J07RC1	519957	1305917	HER-2	58	female	2	2.1*1.1	-	-	T2N0M0	-	-	3+	10	-
CA 1200357	HMU31200357J07RC1	511762	1231366	LA	60	female	2	1.6*1.3	1.7*0.9	-	T1N1M0	+	+	1+	5	-
CA 1000206	HMU31000206J07RC3	433335	1010941	TNB	46	female	1	1.3*0.9	-	-	T1N0M0	-	-	-	40	-
CA 1300451	HMU31300451J07RC1	529528	1316914	LB2	41	female	3	2.9*1.3	-	-	T2N0MO	+	+	3+	40	-
CA 1300526	HMU31300526J07RC1	533615	1319857	TNB	42	female	3	2.8*2.1	1.1*0.6	-	T2N1MO	-	-	-	70	-
CA 1300792	HMU31300792J07RC1	544106	1331865	HER-2	48	female	2	1.8*2.1	-	-	T2N0M0	-	-	3+	10	1+
CA 1200341	HMU31200341J07RC1	509842	1231086	LB2	42	female	2	2.8*1.7	2.3*0.8	-	T2N1M0	-	+	3+	20	-
CA 1001670	HMU31001670J07RC3	452776	1102380	LB1	40	female	3	1.8*2.5	1.7*2.5	-	T2N1M0	+	-	-	80	-
CA 1300577	HMU31300577J07RC1	535420	1322094	HER-2	60	female	3	1.8*2.8	0.6*1.0	-	T2N1M0	-	-	3+	20	2+
CA 1400317	HMU31400317J07RC1	563697	1416115	HER-2	51	female	3	2.1*2.4*2.7	2.3*0.8	-	T2N1M0	-	-	3+	25	-
CA 1200300	HMU31200300J07RC1	508137	1229029	LA	39	female	2	2.4*3.2	0.7*1.2	-	T2N1M0	+	+	2+	3	-
CA 1001406	HMU31001406J07RC3	449972	1100998	LB1	32	female	2	3.2*3.0	1.7*1.6	-	T2N1M0	+	+	1+	20	-
CA 1200200	HMU31200200J07RC1	505869	1224273	HER-2	61	female	2	1.4*2.3	0.8*1.2	-	T2N1M0	-	-	3+	20	1+
CA 1100152	HMU31100152J07RC1	463609	1114912	LA	47	female	2	1.3*0.7	1.3*0.8	-	T1N1M0	+	+	-	<1	-
CA 1400288	HMU31400288J07RC1	563328	1414861	LB2	64	female	3	1.6*2.2	0.9*1.6	-	T2N1M0	+	-	3+	25	+
CA 1300529	HMU31300529J07RC1	533786	1319895	TNB	52	female	2	0.8*1.0	0.5*1.1	-	T1N1M0	-	-	1+	5	-
CA 1400160	HMU31400160J07RC1	556965	1408377	TNB	45	female	2	2.2*1.6	-	-	T2N0M0	-	-	-	50	3+
CA 1200124	HMU31200124J07RC1	501746	1221830	LA	37	female	2	2.2*2.0	1.2*0.9	-	T2N1MO	+	+	1+	6	-
CA 1300595	HMU31300595J07RC1	536423	1322825	HER-2	50	female	3	1.9*2.6	-	-	T2N0M0	-	-	3+	25	2+
CA 1400200	HMU31400200J07RC1	560415	1411046	LB2	53	female	2	1.9*1.8	1.1*0.6	-	T1N1M0	+	+	3+	20	3+
CA 1000248	HMU31000248J07RC3	435091	1012757	LB1	65	female	2	1.8*1.4	1.9*1.0	-	T1N1M0	3+	3+	-	40	-
CA 1400322	HMU31400322J07RC1	541470	1416367	LB2	54	female	3	2.1*1.5	-	-	T2N0MO	+	+	3+	60	-
CA 1300380	HMU31300380J07RC1	528750	1314381	LB2	57	female	2	2.0*1.1	1.0*0.6	-	T2N1M0	+	+	3+	20	-
CA 1300499	HMU31300499J07RC1	532147	1318337	TNB	48	female	2	1.6*2.3	0.6*1.1	-	T2N1MO	-	-	3+	10	3+
CA 1000305	HMU31000305J07RC3	436050	1014369	HER2	59	female	2	2.0*3.0	-	-	T2N0M0	-	-	3+	40	-
CA 1200161	HMU31200161J07RC1	504518	1222911	LA	56	female	2	1.9*1.7	1.1*0.6	-	T1N1M0	+	+	-	8	-
CA 1300501	HMU31300501J07RC1	531492	1318348	TNB	45	female	2	1.6*2.7	0.7*0.8	-	T2N1MO	+	-	2+	30	1+
CA 130263	HMU3130263J07RC1	522397	1309143	TNB	43	female	1	1.5*1.7	1.0*0.6	-	T1N1M0	-	-	-	30	-
CA 1300857	HMU31300857J07RC1	548878	1336548	LB1	54	female	2	2.4*1.3	-	-	T2N0M0	+	+	2+	20	-
CA 130266	HMU3130266J07RC1	522328	1309249	TNB	62	female	3	3.0*2.0	1.2*0.7	-	T2N1MO	-	-	-	80	3+
CA 1300629	HMU31300629J07RC1	535642	1323700	TNB	74	female	3	1.7*1.5	1.0*0.8	-	T1N1M0	-	-	-	50	3+
CA 1300608	HMU31300608J07RC1	535513	1322979	HER-2	51	female	2	1.4*0.8	1.0*0.6	-	T1N1M0	-	-	3+	25	1+
CA 130061	HMU3130061J07RC1	515600	1302137	TNB	46	female	3	3.2*4.2	1.6*2.1	-	T2N1MO	-	-	-	30	3+
CA 130180	HMU3130180J07RC1	519917	1305920	HER-2	46	female	3	1.4*1.7	0.7*1.0	-	T1N1M0
CA 1300641	HMU31300641J07RC1	536865	1324261	TNB	55	female	3	1.5*1.1	-	-	T1N0M0	-	-	1+	25	1+
CA 1200113	HMU31200113J07RC1	501896	1221498	LA	45	female	2	1.5*2.1	0.8*1.5	-	T2N1MO	+	+	1+	8	-
CA 1200125	HMU31200125J07RC1	504426	1221872	HER-2	57	female	3	2.9*2.0	1.4*1.0	-	T2N1M0	-	-	3+	40	3+
CA 1300804	HMU31300804J07RC1	545680	1333208	HER-2	55	female	2	2.2*1.5	1.8*0.7	-	T2N1M0	-	-	3+	25	1+
CA 1300566	HMU31300566J07RC1	534840	1321489	TNB	53	female	2	1.8*1.6	-	-	T1N0M0	-	-	-	50	-
CA 1300469	HMU31300469J07RC1	531337	1317374	LB1	55	female	3	1.5*1.7	0.7*0.9	-	T1N1M0	+	+	1+	40	1+
CA 1300639	HMU31300639J07RC1	535638	1324120	HER-2	65	female	3	1.5*2.6	0.8*1.3	-	T2N1M0	-	-	3+	20	3+
CA 1300778	HMU31300778J07RC1	544475	1330963	LB1	52	female	2	1.7*0.8	-	-	T1N0M0	+	+	2+	＜1	-
CA 1400178	HMU31400178J07RC1	558968	1409508	HER-2	55	female	3	2.6*3.1	1.2*0.8	-	T2N1M0	-	-	3+	60	-
CA 1300617	HMU31300617J07RC1	537518	1323271	HER-2	50	female	2	1.7*1.7	-	-	T1N1M0	-	-	2+	20	-
CA 1200253	HMU31200253J07RC1	508151	1226645	HER-2	43	female	2	2.1*1.3	1.3*0.6	-	T2N1M0	-	-	3+	15	2+
CA 1001472	HMU31001472J07RC3	420037		LA	37	female	1	2.3*3.8	2.1*1.1	-	T2N1M0
CA 130234	HMU3130234J07RC1	521387	1307915	HER-2	35	female	3	1.8*1.6	-	-	T1N0M0	-	-	3+	20	-
CA 130131	HMU3130131J07RC1	518135	1304705	HER-2	58	female	2	1.4*1.3	-	-	T1N0M0	-	-	3+	60	3+
CA 130280	HMU3130280J07RC1	524086	1303024	TNB	41	female	3	3.4*2.7	1.0*0.5	-	T2N1MO	-	-	1+	70	-
CA 130154	HMU3130154J07RC1	519749	1305333	TNB	61	female	3	1.9*2.1	0.7*1.2	-	T2N1MO	-	-	2+	10	-
CA 1000243	HMU31000243J07RC3	432585	1012914	TNB	63	female	2	2.6*1.5	1.4*1.1	-	T2N1M0	-	-	-	70	-
CA 1000342	HMU31000342J07RC3	432713	1015115	LA	61	female	1	1.6*1.4	-	-	T1N0M0	3+	3+	-	5	-
CA 1100098	HMU31100098J07RC1	462999	1112424	HER-2	50	female	2	1.0*1.4	1.0*1.3	-	T1N1M0	-	-	3+	30	1+
CA 130292	HMU3130292J07RC1	524484	1310572	TNB	59	female	2	1.2*2.1*2.3	1.3*0.6	-	T2N1MO	-	-	-	10	2+
CA 1200199	HMU31200199J07RC1	505423	1224287	HER-2	47	female	1	3.9*2.1	1.2*0.6	-	T2N1M0	-	-	3+	5	-
CA 130296	HMU3130296J07RC1	524156	1310923	TNB	41	female	3	3.9*5.1	2.3*0.9	-	T3N1M0	-	-	-	70	-
CA 1002021	HMU31002021J07RC3	454606	1104421	LB2	55	female	2	1.3*3.1	1.1*0.6	-	T2N1M0	+	-	3+	20	+
CA 1200149	HMU31200149J07RC1	504121	1222712	TNB	55	female	2	1.8*1.7	-	-	T1N0M0	-	-	2+	25	-
CA 1400346	HMU31400346J07RC1	566360	1417455	LB1	41	female	1	3.0*1.0	3.4*1.2	-	T2N3MO	+	+	1+	20	+
CA 1200183	HMU31200183J07RC1	503692	1223843	TNB	54	female	2	2.2*2.7	-	-	T2N0M0	-	-	-	10	-
CA 1300742	HMU3130074J07RC1	516761	1302537	HER-2	39	female	3	2.9*2.1	1.1*0.5	-	T2N1M0	-	-	3+	20	-
CA 1200296	HMU31200296J07RC1	509019	1228588	LA	46	female	2	3.0*2.1*2.4	1.6*0.9	-	T2N1M0	+	+	1+	10	-
CA 1200296	HMU31200291J07RC1	508009	1228435	HER-2	46	female	2	2.2*1.5*1.7	1.7*0.8	-	T2N1M0	-	-	3+	20	1+
CA 1300337	HMU31300337J07RC1	524613	1312297	LB2	46	female	2	2.4*1.3	1.6*1.3	-	T2N1M0	+	+	3+	10	1+
CA 1200234	HMU31200234J07RC1	506269	1225842	LB2	42	female	2	2.4*1.4	1.7*1.2	-	T2N1M0	+	+	3+	30	-
CA 1200121	HMU31200121J07RC1	502456	1221806	HER-2	45	female	1	2.5*1.6	1.0*0.6	-	T2N1M0	-	-	3+	20	3+
CA 1200181	HMU31200181J07RC1	505109	1223730	HER-2	41	female	3	1.4*1.7	-	-	T1N0M0	-	-	3+	30	-
CA 1300498	HMU31300498J07RC1	532443	1318194	TNB	59	female	2	1.1*1.2	0.6*1.0	-	T1N1M0	-	-	-	20	-
CA 130277	HMU3130277J07RP1	522982	1309689	LB1	62	female	2	1.9*1.1	-	-	T1N0M0	+	-	2+	8	1+
CA 1200364	HMU31200364J07RC1	512622	1231594	TNB	49	female	1	2.9*1.6	-	-	T2N0M0	-	-	-	10	-
CA 1300426	HMU31300426J07RC1	528991	1316236	TNB	40	female	3	3.4*2.4	3.2*2.2	-	T2N1MO	-	-	1+	70	3+
CA 1002082	HMU31002082J07RC3	456014	1104967	HER2	46	female	2	1.6*2.6	1.0*1.6	-	T2N1M0	-	-	3+	20	+
CA 1000002	HMU31000002J07RC3	426674	1005270	LA	48	female	2	1.7*2.4	-	-	T2N0MO	+	3+	-	10	+
CA 1300513	HMU31300513J07RC1	529676	1319091	LB2	51	female	3	2.1*3.4	0.9*1.5	-	T2N1M0	+	+	3+	50	-
CA 1002440	HMU31002440J07RC3	458187	1108722	LB2	40	female	2	1.5*1.1	-	-	T1N0M0	+	+	2+	8	-
CA 1400380	HMU31400380J07RC1	568810	1419416	TNB	47	female	3	1.2*1.3	1.9*1.4	-	T1N1M0	-	-	-	>60	-
CA 1300489	HMU31300489J07RC1	532253	1318108	TNB	64	female	3	2.0*2.7	0.6*1.1	-	T2N1MO	-	-	-	40	-
CA 1400054	HMU31400054J07RC1	552281	1403387	TNB	43	female	2	1.9*1.1	-	-	T1N0M0	-	-	1+	10	1+
CA 130286	HMU3130286J07RC1	524331	1310072	TNB	67	female	3	1.3*2.0	1.4*0.7	-	T2N1MO	-	-	1+	40	3+
CA 1001895	HMU31001895J07RC3	452135	1103528	HER2	56	female	2	1.6*1.6	-	-	T1N0M0	-	-	2+	20	2+
CA 1000004	HMU31000004J07RC3	426765	1005339	LA	54	female	2	3.5*4.0	-	-	T2N0M0	3+	3+	-	5	+
CA 1200185	HMU31200185J07RC1	503700	1223850	TNB	44	female	2	1.1*1.6	0.6*1.1	-	T1N1M0	-	-	1+	60	-
CA 130285	HMU3130285J07RC1	523947	1310062	LB1	45	female	2	3.3*.3.3	2.5*1.7	-	T2N1MO	+	+	-	20	-
CA 130099	HMU3130099J07RC1	517510	1303779	TNB	57	female	3	3.5*1.9	0.8*0.4	-	T2N1MO	-	-	-	60	-
CA 1200175	HMU31200175J07RC1	505565	1223558	LB2	39	female	3	1.9*1.4	1.0*0.7	-	T1N1M0	+	+	3+	20	-
CA 1300812	HMU31300812J07RC1	545759	1333641	HER-2	49	female	2	1.4*1.5	-	-	T1N0M0	-	-	3+	30	-
CA 1300650	HMU31300650J07RC1	535663	1324768	HER-2	58	female	3	2.0*2.6	0.9*1.4	-	T2N1M0	-	-	3+	30	3+
CA 1200187	HMU31200187J07RC1	505093	1223846	TNB	69	female	3	7.5*5.3	-	-	T3N0M0	-	-	-	50	-
CA 1300479	HMU31300479J07RC1	532423	1317784	TNB	51	female	2	1.4*1.7	0.6*1.0	-	T1N1M0	-	-	-	20	-
CA 1001070	HMU31001070J07RC3	448402	1026118	LB1	40	female	2	1.8*2.4	-	-	T2N0M0	+	-	-	10	-
