# Supplementary material for: LncRNA TINCR favors tumorigenesis via STAT3–TINCR–EGFR-feedback loop by recruiting DNMT1 and acting as a competing endogenous RNA in human breast cancer
Source: Cell Death Dis. 2021 Jan 14;12(1):83. doi: 10.1038/s41419-020-03188-0 (PMC7809450; doi:10.1038/s41419-020-03188-0)
Supplement: Supplementary file 10 — Supplementary Table S3 [file 41419_2020_3188_MOESM10_ESM.xlsx]

## Sheet: Sheet1
GSE11121
GSE12276
GSE1456
GSE16391
GSE16391
GSE16446
GSE16716
GSE17705
GSE17907
GSE18728
GSE19615
GSE20194
GSE20271
GSE2034
GSE20685
GSE20711
GSE21653
GSE2603
GSE26971
GSE2741
GSE2990
GSE31448
GSE31519
GSE32646
GSE3494
GSE37946
GSE41998
GSE42568
GSE45255
GSE4611
GSE5327
GSE6532
GSE7390
GSE9195
E-MATAB-365
E-TABM-43
